# Supplementary material for: In-situ trace element and S isotope systematics in pyrite from three porphyry-epithermal prospects, Limnos Island, Greece
Source: Frontiers journal article supplement (doi:10.3389/feart.2022.916107), 2022-10-10
Supplement: Data_Sheet_1.pdf [file Data_Sheet_1.pdf]

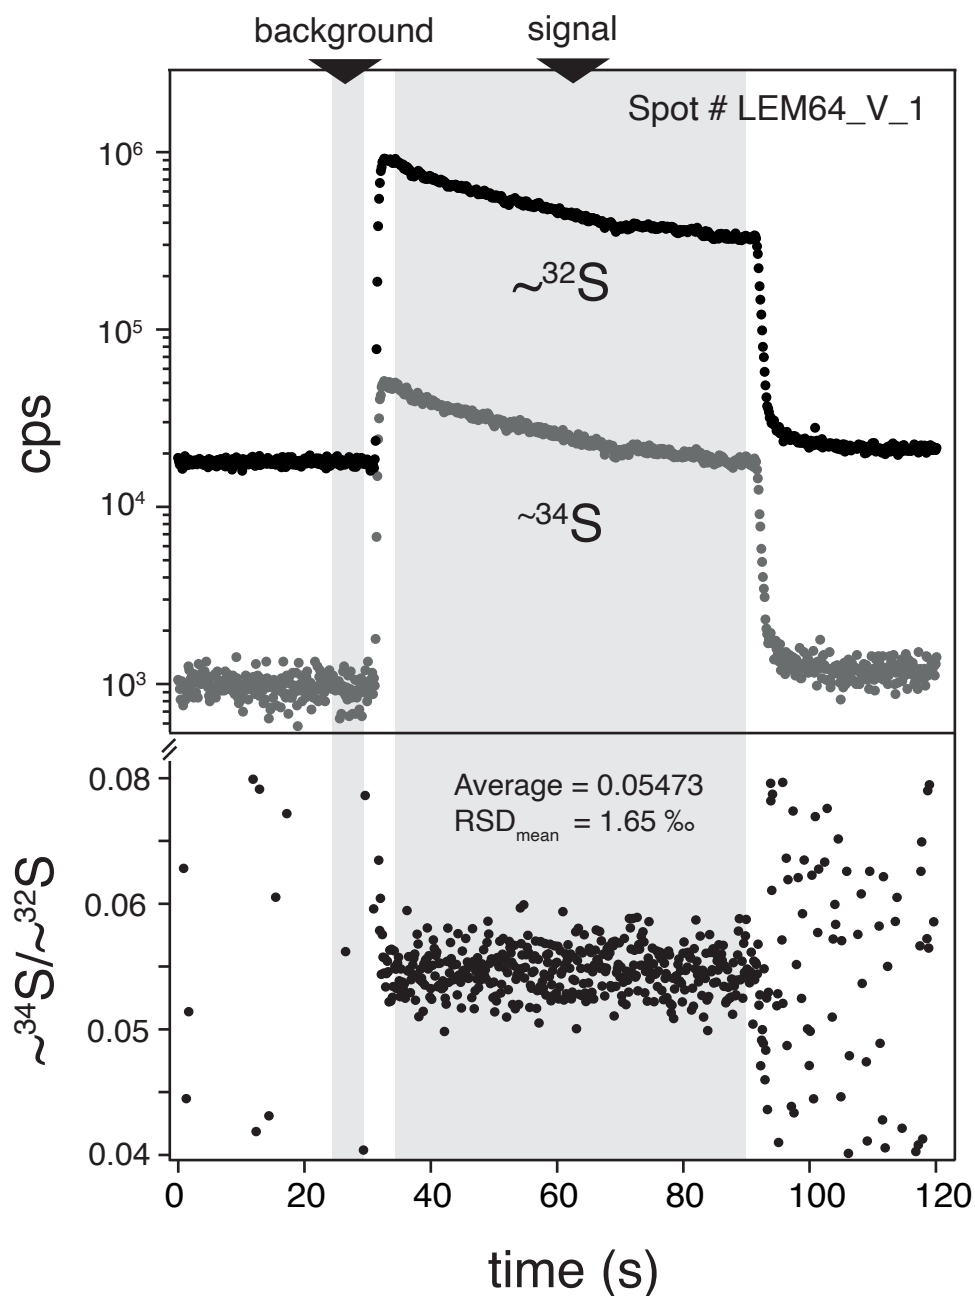

Data Sheet 1: Example of a LA-ICP-MS spot analysis of pyrite analyzed in this study. Sulfur isotopes are measured in mass shift mode as  $^{34}\text{S}^{16}\text{O}^+$  and  $^{32}\text{S}^{16}\text{O}^+$  denoted  $\sim^{34}\text{S}$  and  $\sim^{32}\text{S}$ , respectively. Integration windows for background and signal are indicated, such as the resulting background corrected  $\sim^{34}\text{S}/\sim^{32}\text{S}$  ratios. For further details see methods section.
