# Supplementary material for: In-situ trace element and S isotope systematics in pyrite from three porphyry-epithermal prospects, Limnos Island, Greece
Source: Frontiers journal article supplement (doi:10.3389/feart.2022.916107), 2022-10-10
Supplement: Table_2.XLSX [file Table_2.XLSX]

## Sheet: sphalerite
No.	Sample	Mineral	stage	Spot name	Comment	Te	As	S	Cu	Cd	Au	Ag	Fe	Sb	Pb	Zn	Total	mol% FeS
Fakos (wt. %)
40	LM-27B	sp	epithermal IS	LM27B_I_sph1		0	0	32.775	0.4	0.466	0.035	0.004	0.686	0	0.073	65.024	99.463	1.20398
41	LM-27B	sp	epithermal IS	LM27B_I_sph2		0	0.013	32.523	0.689	0.427	0	0	0.804	0	0.111	63.965	98.532	1.42335
42	LM-27B	sp	epithermal IS	LM27B_I_sph3		0	0.004	32.827	1.423	0.437	0	0.012	1.245	0	0.016	62.677	98.641	2.19447
51	LM-27B	sp	epithermal IS	LM27B_III_sph1		0.008	0	32.994	0.118	0.413	0	0	0.46	0.058	0.045	65.961	100.057	0.802457
52	LM-27B	sp	epithermal IS	LM27B_III_sph2		0	0	33.118	0.064	0.415	0	0.028	0.616	0.05	0	66.054	100.345	1.07086
53	LM-27B	sp	epithermal IS	LM27B_III_sph3		0.01	0.008	32.669	0.093	0.419	0.023	0.013	0.674	0.001	0.061	65.953	99.924	1.17968
54	LM-27B	sp	epithermal IS	LM27B_III_sph4		0	0	32.745	0.046	0.408	0	0	0.585	0	0.035	65.527	99.346	1.02749
60	LM-27B	sp	epithermal IS	LM27B_VIII_sp1		0	0	32.819	0.646	0.431	0	0.033	0.659	0.064	0.016	65.558	100.226	1.14929
61	LM-27B	sp	epithermal IS	LM27B_VIII_sp2		0	0	33.24	0.452	0.388	0	0	0.57	0	0	65.273	99.923	0.992707
62	LM-27B	sp	epithermal IS	LM27B_VIII_sp3		0.004	0	32.853	0.466	0.406	0	0.01	0.545	0	0.006	65.265	99.555	0.954787
63	LM-27B	sp	epithermal IS	LM27B_VIII_sp4		0	0.021	32.756	0.244	0.442	0	0	0.764	0.006	0.019	65.482	99.734	1.3376
71	LM-27B	sp	epithermal IS	LM27B_IV_sp1		0.028	0	32.504	0.999	0.413	0	0	1.381	0.002	0.051	63.654	99.032	2.4334
72	LM-27B	sp	epithermal IS	LM27B_IV_sp2		0.011	0	32.562	0.709	0.418	0	0	0.685	0	0	65.093	99.478	1.20319
74	LM-27B	sp	epithermal IS	LM27B_IV_sp4		0.042	0	32.432	0.131	0.494	0	0.024	0.692	0	0.038	65.717	99.57	1.21678
77	LM-27B	sp	epithermal IS	LM27B_XVII_sp1		0	0.04	32.06	0.039	0.521	0.052	0.052	0.673	0	0.026	65.587	99.05	1.19183
78	LM-27B	sp	epithermal IS	LM27B_XVII_sp2		0	0	31.918	0.002	0.447	0.15	0.031	0.626	0.008	0	65.567	98.749	1.11251
79	LM-27B	sp	epithermal IS	LM27B_XVII_sp3		0.004	0	32.487	0.046	0.422	0	0	0.583	0.049	0	65.912	99.503	1.02488
86	LM-27B	sp	epithermal IS	LM27B_XIII_sp1		0	0	32.384	0.025	0.407	0.023	0	0.618	0	0.029	65.937	99.423	1.08793
87	LM-27B	sp	epithermal IS	LM27B_XIII_sp2		0	0	32.53	0.345	0.426	0.017	0.014	0.508	0.009	0.01	65.251	99.11	0.895439
88	LM-27B	sp	epithermal IS	LM27B_XIII_sp3		0.021	0.015	32.385	0.033	0.423	0.046	0.012	0.667	0	0.026	65.622	99.25	1.17596
92	LM-27B	sp	epithermal IS	LM27B_VII_sp1		0	0.005	32.917	0.151	0.448	0	0.008	0.559	0	0.089	65.477	99.654	0.978683
93	LM-27B	sp	epithermal IS	LM27B_VII_sp2		0	0	32.683	0.737	0.425	0	0.019	0.691	0	0.064	64.468	99.087	1.21658
94	LM-27B	sp	epithermal IS	LM27B_VII_sp3		0	0	32.653	0.505	0.411	0	0	0.584	0.077	0	64.798	99.028	1.02892
42	LM-27B	sp	epithermal IS	LM27B_VI_sp1	Cu > 2 wt%	0	0	33.344	4.13	0.456	0	0	3.4	0	0.106	59.812	101.248	5.83786
43	LM-27B	sp	epithermal IS	LM27B_VI_sp2		0.019	0.03	33.445	0.464	0.447	0.058	0.013	0.566	0	0	65.335	100.377	0.981469
44	LM-27B	sp	epithermal IS	LM27B_VI_sp3		0.002	0.015	32.787	0.801	0.411	0	0	0.808	0	0	63.493	98.317	1.42887
45	LM-27B	sp	epithermal IS	LM27B_VI_sp4		0	0.009	32.225	1.023	0.425	0	0.004	1.081	0	0	64.894	99.661	1.90004
47	LM-27B	sp	epithermal IS	LM27B_VI_sp_5		0	0	33.147	0.734	0.413	0	0	0.726	0	0	64.993	100.013	1.26423
48	LM-27B	sp	epithermal IS	LM27B_VI_sp_7		0.02	0	32.622	1.89	0.432	0	0	1.755	0	0	63.117	99.836	3.06818
51	LM-27B	sp	epithermal IS	LM27B_VI_sp_8		0.043	0.053	33.234	0.326	0.478	0.069	0.016	0.398	0	0	66.183	100.8	0.689458
149	LM-29	sp	epithermal HS	LM29_III_sp_2		0	0	32.199	0	0.295	0.058	0	0.135	0	0	65.931	98.618	0.239522
150	LM-29	sp	epithermal HS	LM29_III_sp_3		0	0	32.159	0	0.317	0.017	0	0.318	0	0	65.676	98.487	0.564735
151	LM-29	sp	epithermal HS	LM29_III_sp_4		0	0.009	32.545	0.038	0.299	0	0	0.254	0.028	0	66.47	99.643	0.445828
93	LM-29	sp	epithermal HS	LM29_I_sp		n.a.	0	33.396	0.016	0.404	n.a.	n.a.	0.173	0	0	66.138	100.127	0.300672
94	LM-29	sp	epithermal HS	LM29_I_sp		n.a.	0.004	33.23	0.006	0.333	n.a.	n.a.	0.131	0.012	0.025	66.38	100.121	0.22798
95	LM-29	sp	epithermal HS	LM29_I_sp		n.a.	0	33.326	0.014	0.283	n.a.	n.a.	0.122	0.025	0	66.825	100.595	0.211366
96	LM-29	sp	epithermal HS	LM29_I_sp		n.a.	0	33.311	0.02	0.473	n.a.	n.a.	0.058	0.019	0	66.442	100.323	0.100765
97	LM-29	sp	epithermal HS	LM29_I_sp		n.a.	0	33.287	0.016	0.431	n.a.	n.a.	0.056	0	0.003	66.597	100.39	0.0972429
98	LM-29	sp	epithermal HS	LM29_I_sp		n.a.	0	33.062	0	0.368	n.a.	n.a.	0.044	0	0	66.219	99.693	0.0769215
99	LM-29	sp	epithermal HS	LM29_I_sp		n.a.	0	33.267	0.007	0.33	n.a.	n.a.	0.125	0	0	66.283	100.012	0.217614
100	LM-29	sp	epithermal HS	LM29_I_sp		n.a.	0	33.222	0.013	0.336	n.a.	n.a.	0.211	0.022	0.022	66.36	100.186	0.36702
101	LM-29	sp	epithermal HS	LM29_II_sp		n.a.	0	33.13	0.042	0.27	n.a.	n.a.	0.132	0.074	0	66.674	100.322	0.229526
102	LM-29	sp	epithermal HS	LM29_II_sp		n.a.	0	33.279	0	0.271	n.a.	n.a.	0.126	0.059	0	67.077	100.812	0.218041
103	LM-29	sp	epithermal HS	LM29_II_sp		n.a.	0.016	33.289	0.03	0.279	n.a.	n.a.	0.055	0.035	0	66.799	100.503	0.0953913
104	LM-29	sp	epithermal HS	LM29_II_sp		n.a.	0	33.23	0.01	0.286	n.a.	n.a.	0.189	0.018	0	65.827	99.56	0.330186
105	LM-29	sp	epithermal HS	LM29_II_sp		n.a.	0.01	34.13	0.001	0.332	n.a.	n.a.	0.434	0.013	0.028	65.917	100.865	0.745717
106	LM-29	sp	epithermal HS	LM29_II_sp		n.a.	0	34.295	0.03	0.303	n.a.	n.a.	0.305	0	0	65.848	100.781	0.523661
107	LM-29	sp	epithermal HS	LM29_II_sp		n.a.	0	33.068	0.012	0.475	n.a.	n.a.	1.466	0.001	0.006	63.87	98.898	2.57435
108	LM-29	sp	epithermal HS	LM29_V_sp		n.a.	0	32.936	0	0.437	n.a.	n.a.	0.443	0.049	0	65.959	99.824	0.774364
109	LM-29	sp	epithermal HS	LM29_V_sp		n.a.	0	33.174	0	0.444	n.a.	n.a.	0.243	0.04	0.046	65.775	99.722	0.424508
124	LM-29	sp	epithermal HS	LM29_XV_sp		n.a.	0	32.985	0	0.464	n.a.	n.a.	0.163	0.016	0	65.924	99.552	0.285489
125	LM-29	sp	epithermal HS	LM29_XV_sp		n.a.	0.019	33.037	0.022	0.451	n.a.	n.a.	0.058	0	0	66.407	99.994	0.101214
126	LM-29	sp	epithermal HS	LM29_XV_sp		n.a.	0.024	32.959	0.019	0.298	n.a.	n.a.	0.027	0	0.071	66.507	99.905	0.0471735
127	LM-29	sp	epithermal HS	LM29_XV_sp		n.a.	0.027	32.976	0.041	0.306	n.a.	n.a.	0.169	0.043	0	66.042	99.604	0.295787
128	LM-29	sp	epithermal HS	LM29_XV_sp		n.a.	0	32.782	0.129	0.427	n.a.	n.a.	0.561	0	0.059	64.468	98.426	0.992096
130	LM-29	sp	epithermal HS	LM29_XV_sp		n.a.	0	33.236	0.019	0.315	n.a.	n.a.	0.313	0.04	0.087	66.478	100.488	0.543271
131	LM-29	sp	epithermal HS	LM29_XV_sp		n.a.	0	33.258	0.027	0.282	n.a.	n.a.	0.347	0.042	0	66.102	100.058	0.603757
132	LM-29	sp	epithermal HS	LM29_XV_sp		n.a.	0	32.955	0.015	0.351	n.a.	n.a.	0.148	0.024	0	66.384	99.877	0.258568
133	LM-29	sp	epithermal HS	LM29_XV_sp		n.a.	0	33.196	0.009	0.348	n.a.	n.a.	0.221	0.015	0	66.169	99.958	0.385102
134	LM-29	sp	epithermal HS	LM29_XV_sp		n.a.	0.047	33.561	0	0.346	n.a.	n.a.	0.504	0	0.006	65.459	99.923	0.875704
252	LM-33a	sp	epithermal IS	LM33a_I_sp2		0.013	0	32.884	0.075	0.442	0.006	0.006	0.746	0.019	0	64.736	98.927	1.31282
253	LM-33a	sp	epithermal IS	LM33a_I_sp3		0.014	0	32.797	0.055	0.406	0.017	0	0.798	0	0.035	65.77	99.892	1.39512
254	LM-33a	sp	epithermal IS	LM33a_I_sp4		0	0	32.893	0.195	0.437	0.006	0.037	0.826	0.081	0.108	65.613	100.196	1.44072
261	LM-33a	sp	epithermal IS	LM33a_II_sp1		0	0.036	32.947	0.118	0.474	0.017	0	0.672	0	0	65.722	99.986	1.17284
262	LM-33a	sp	epithermal IS	LM33a_II_sp2		0	0.015	32.93	0.027	0.434	0.012	0	0.632	0	0	65.47	99.52	1.10691
263	LM-33a	sp	epithermal IS	LM33a_II_sp3		0.017	0	32.509	0.047	0.435	0	0.005	0.358	0.046	0.089	65.652	99.158	0.631402
268	LM-33a	sp	epithermal IS	LM33a_XII_sp1		0	0	32.608	0.006	0.499	0.064	0	0.438	0.053	0	65.747	99.415	0.770346
269	LM-33a	sp	epithermal IS	LM33a_XII_sp2		0	0	33.392	0.014	0.469	0.006	0.028	0.203	0	0	66.258	100.37	0.352284
270	LM-33a	sp	epithermal IS	LM33a_XII_sp3		0	0	32.312	0.007	0.532	0.012	0	0.248	0.054	0.035	66.377	99.577	0.436771
274	LM-33a	sp	epithermal IS	LM33a_VIII_sp1		0	0	33.842	0.025	0.45	0.04	0.019	0.223	0	0	66.485	101.084	0.383653
275	LM-33a	sp	epithermal IS	LM33a_VIII_sp2		0	0	33.761	0	0.468	0	0.005	0.299	0	0	66.196	100.729	0.51593
276	LM-33a	sp	epithermal IS	LM33a_VIII_sp3		0.014	0	33.512	0	0.497	0	0	0.49	0.085	0	65.783	100.381	0.849451
302	LM-33a	sp	epithermal IS	LM33a_V_sp1		0	0	33.349	0.196	0.487	0	0	0.438	0	0	64.643	99.113	0.767205
306	LM-33a	sp	epithermal IS	LM33a_X_sp1		0	0	33.21	0.044	0.476	0.081	0	0.269	0.027	0	65.793	99.9	0.469259
80	LM-33b	sp	epithermal IS	LM33b_V_sp_1		0.002	0.011	32.426	0.02	0.091	0	0.003	1.221	0	0	65.759	99.533	2.14269
81	LM-33b	sp	epithermal IS	LM33b_V_sp_2		0	0	32.106	0.015	0.062	0.029	0.008	0.874	0	0	66.444	99.538	1.53828
118	LM-33b	sp	epithermal IS	LM33b_VII_sp1		0.008	0.013	33.197	0.069	0.452	0.052	0.002	0.47	0	0.003	65.451	99.717	0.820679
119	LM-33b	sp	epithermal IS	LM33b_VII_sp2	Cu > 2 wt%	0.031	0.013	33.541	4.813	0.393	0	0	3.946	0	0.035	56.701	99.473	6.84563
120	LM-33b	sp	epithermal IS	LM33b_VII_sp3		0	0	33.412	0.206	0.466	0.121	0	0.715	0	0.064	65.281	100.265	1.24172
121	LM-33b	sp	epithermal IS	LM33b_VII_sp4		0.012	0	33.447	0.043	0.491	0	0	0.593	0	0.038	65.431	100.055	1.03074
122	LM-33b	sp	epithermal IS	LM33b_VII_sp5		0.021	0	33.063	0.116	0.436	0	0.008	0.524	0	0.051	65.134	99.353	0.918334
123	LM-33b	sp	epithermal IS	LM33b_VI_sp1		0	0	33.937	0	0.47	0	0.021	0.278	0.03	0	66.584	101.32	0.477059
124	LM-33b	sp	epithermal IS	LM33b_VI_sp2		0	0	33.824	0	0.483	0	0.009	0.51	0.037	0.086	65.785	100.734	0.879869
125	LM-33b	sp	epithermal IS	LM33b_VI_sp3		0	0	33.966	0.023	0.468	0.144	0.016	0.462	0	0.045	65.403	100.527	0.797732
126	LM-33b	sp	epithermal IS	LM33b_VI_sp4		0.007	0	33.14	0.002	0.481	0	0	0.241	0	0	66.279	100.15	0.419687
132	LM-33b	sp	epithermal IS	LM33b_VIII_sp1		0.024	0	33.255	0.022	0.441	0.006	0.021	0.244	0.05	0	65.86	99.923	0.425334
133	LM-33b	sp	epithermal IS	LM33b_VIII_sp2		0	0.028	33.263	0	0.471	0	0	0.31	0.008	0	66.324	100.404	0.53827
134	LM-33b	sp	epithermal IS	LM33b_VIII_sp3		0	0	33.554	0	0.427	0	0	0.256	0.035	0	65.686	99.958	0.444982
146	LM-33b	sp	epithermal IS	LM33b_IV_sp1		0	0	33.224	0.525	0.461	0.035	0	1.036	0.06	0.022	64.137	99.5	1.81042
225	LM-64	sp	epithermal IS vein in propylitic altered host rock	LM64_III_sp1		0	0	33.466	0.076	0.463	0	0.028	0.432	0	0	65.473	99.938	0.751403
226	LM-64	sp	epithermal IS vein in propylitic altered host rock	LM64_III_sp2		0	0.015	33.473	0.065	0.497	0	0	0.517	0	0	65.925	100.492	0.895453
227	LM-64	sp	epithermal IS vein in propylitic altered host rock	LM64_III_sp3		0.001	0	33.347	0.017	0.468	0	0.017	0.582	0.019	0	65.75	100.201	1.01113
74	LM-64	sp	epithermal IS vein in propylitic altered host rock	LM64_III_sp		n.a.	0	33.119	0.029	0.483	n.a.	n.a.	0.575	0.025	0	65.778	100.009	1.00218
75	LM-64	sp	epithermal IS vein in propylitic altered host rock	LM64_III_sp		n.a.	0	32.997	0.086	0.481	n.a.	n.a.	0.553	0	0.043	65.44	99.6	0.967834
76	LM-64	sp	epithermal IS vein in propylitic altered host rock	LM64_III_sp		n.a.	0	33.176	0.074	0.473	n.a.	n.a.	0.553	0	0.009	65.696	99.981	0.963561
77	LM-64	sp	epithermal IS vein in propylitic altered host rock	LM64_III_sp		n.a.	0	33.717	0.039	0.453	n.a.	n.a.	0.387	0.018	0.022	65.304	99.94	0.671906
78	LM-64	sp	epithermal IS vein in propylitic altered host rock	LM64_III_sp		n.a.	0	33.484	0.16	0.468	n.a.	n.a.	0.451	0.05	0.065	65.28	99.958	0.784534
min						0	0	31.918	0	0.062	0	0	0.027	0	0	56.701
max						0.043	0.053	34.295	4.813	0.532	0.15	0.052	3.946	0.085	0.111	67.077
std						0.0103342	0.0108468	0.46639	0.693904	0.0805006	0.0337911	0.0115417	0.556616	0.0232168	0.0297723	1.33517
geo. mean						n.a.	n.a.	33.04	n.a.	0.398674	n.a.	n.a.	0.402741	n.a.	n.a.	65.4683
Kaspakas (wt. %)
40	LEM_18	sp	epithermal IS	LEM_18A_III_			0	33.423	0.019	0.116			8.961	0	0	55.761	98.28	15.6002
51	LEM_6	sp	epithermal IS	LEM_6_I_			0.018	33.272	0.118	0.563			0.641	0.011	0	65.54	100.163	1.11497
55	LEM_6	sp	epithermal IS	LEM_6_II_			0	33.232	0.023	0.523			2.928	0	0	63.236	99.942	5.08739
42	LEM19I	sp	epithermal IS	LEM19III-IV_			0	33.401	0.11	0.429			0.544	0	0	65.369	99.853	0.947155
43	LEM19I	sp	epithermal IS	LEM19III-IV_			0	33.538	0.478	0.427			0.903	0	0	64.761	100.107	1.56674
44	LEM19I	sp	epithermal IS	LEM19III-IV_			0	33.229	0.158	0.418			0.709	0.074	0.055	65.221	99.864	1.23633
108	LEM19I	sp	epithermal IS	LEM19III_II			0	33.058	0.198	0.559			0.691	0	0	64.363	98.869	1.21545
109	LEM19I	sp	epithermal IS	LEM19III_II			0	32.801	0.308	0.568			0.849	0.036	0	63.887	98.449	1.50101
112	LEM19I	sp	epithermal IS	LEM19III_II			0	32.713	0.179	0.605			0.505	0.062	0.025	64.995	99.084	0.889894
113	LEM19I	sp	epithermal IS	LEM19III_I_			0	32.66	0.044	0.59			0.75	0	0.065	64.744	98.853	1.32402
117	LEM19I	sp	epithermal IS	LEM19III_III_			0	32.704	0.041	0.567			0.635	0.034	0	64.754	98.735	1.12146
118	LEM19I	sp	epithermal IS	LEM19III_III_			0	32.97	0.002	0.573			0.84	0.012	0	64.639	99.036	1.47661
min						0	0	32.66	0.002	0.116	0	0	0.505	0	0	55.761	98.28	0.889894
max						0	0.018	33.538	0.478	0.605	0	0	8.961	0.074	0.065	65.54	100.163	15.6002
std						n.a.	0.00519615	0.309747	0.139952	0.136773	n.a.	n.a.	2.41356	0.0264006	0.023593	2.65263	0.674654	4.19834
geo. mean						n.a.	n.a.	33.0821	0.0711647	0.462704	n.a.	n.a.	0.970046	n.a.	n.a.	63.8847	99.2675	1.69884

## Sheet: galena
Sample	Mineral	stage	No	Spot name	Te	As	S	Cu	Cd	Au	Ag	Fe	Sb	Pb	Zn	Total	Pb*
Fakos (wt. %)
LM-27B	gn	epithermal IS	37	LM27B_I_gn1	0.184	0	13.095	0.22	0.107	0	0	0.043	0	81.453	0.05	95.152	86.1489
LM-27B	gn	epithermal IS	38	LM27B_I_gn2	0.081	0	13.158	0.372	0.063	0	0	0.157	0.216	83.615	0.071	97.733	86.4022
LM-27B	gn	epithermal IS	39	LM27B_I_gn3	0.261	0	13.19	0.559	0.06	0	0	0.089	0	82.331	0.114	96.604	86.1906
LM-27B	gn	epithermal IS	44	LM27B_II_gn1	0.202	0	13.305	0.18	0.053	0	0	0.021	0.005	82.827	0	96.593	86.1906
LM-27B	gn	epithermal IS	45	LM27B_II_gn2	0.894	0	13.068	0.072	0.045	0.436	0	0.018	0.352	80.925	0	95.81	86.1906
LM-27B	gn	epithermal IS	55	LM27B_III_gn1	0.022	0	13.328	0.009	0.066	0	0	0.016	0	82.696	0.022	96.159	86.1906
LM-27B	gn	epithermal IS	56	LM27B_III_gn2	0.043	0	13.442	0	0.02	0	0	0.03	0.168	82.167	0	95.87	86.1906
LM-27B	gn	epithermal IS	59	LM27B_III_gn3	0.043	0	13.157	0	0.085	0	0	0	0.073	81.723	0.006	95.087	86.1906
LM-27B	gn	epithermal IS	75	LM27B_XVII_gn1	0.049	0	13.04	0.029	0.074	0	0	0	0	82.282	0	95.474	86.1906
LM-27B	gn	epithermal IS	76	LM27B_XVII_gn2	0.038	0	12.98	0.047	0.041	0	0	0.015	0	81.698	0.002	94.821	86.1906
LM-27B	gn	epithermal IS	80	LM27B_XV_gn1	0.014	0	13.038	0	0.053	0	0	0	0.009	83.054	0	96.168	86.1906
LM-27B	gn	epithermal IS	81	LM27B_XV_gn2	0.014	0	12.874	0.009	0.06	0	0	0.017	0.041	83.923	0.003	96.941	86.1906
LM-27B	gn	epithermal IS	85	LM27B_XIII_gn1	0.061	0	13.186	0.033	0.052	0	0	0.006	0.176	85.319	0	98.833
LM-27B	gn	epithermal IS	90	LM27B_VII_gn1	0.014	0	13.263	0	0.055	0	0	0	0.068	84.89	0.213	98.503
LM-33b	gn	epithermal IS	97	LM33b_II_gn1	0.052	0	13.463	0.02	0.047	0	0	0	0.021	85.546	0.008	99.157
LM-33b	gn	epithermal IS	98	LM33b_II_gn2	0.064	0	13.284	0	0.077	0	0	0	0.099	85.694	0	99.218
LM-33b	gn	epithermal IS	99	LM33b_II_gn3	0.025	0	13.097	0	0.058	0	0	0	0.033	85.223	0	98.436
LM-33b	gn	epithermal IS	100	LM33b_II_gn4	0	0	13.35	0	0.072	0	0	0.006	0.094	85.744	0	99.266
LM-33b	gn	epithermal IS	108	LM33b_VII_gn1	0.025	0	13.325	0.001	0.054	0	0	0.049	0.029	84.761	0.018	98.262
LM-33b	gn	epithermal IS	109	LM33b_VII_gn2	0.03	0	13.37	0	0.021	0	0	0.025	0.063	86.414	0.137	100.06
LM-33b	gn	epithermal IS	110	LM33b_VII_gn3	0.048	0	13.367	0.006	0.029	0	0	0.031	0.103	86.491	0.66	100.735
LM-33b	gn	epithermal IS	127	LM33b_VI_gn1	0.049	0	13.533	0	0.024	0	0	0	0.076	86.024	0.006	99.712
LM-33b	gn	epithermal IS	145	LM33b_IV_gn1	0.046	0	13.454	0	0.01	0	0	0.014	0	84.315	0.043	97.882	86.1906
LM-33b	gn	epithermal IS	176	LM33b_III_gn1	0	0	13.52	0.033	0.036	0	0	0.042	0.03	85.532	0	99.193
LM-33b	gn	epithermal IS	177	LM33b_III_gn2	0	0	13.322	0.013	0.015	0	0	0	0	85.475	0	98.825
LM-33a	gn	epithermal IS	259	LM33a_II_gn1	0.043	0	13.171	0	0.037	0	0	0.006	0	85.795	0.035	99.087
LM-33a	gn	epithermal IS	260	LM33a_II_gn2	0.005	0	13.263	0.02	0.054	0	0	0.023	0.006	85.84	0.02	99.231
LM-33a	gn	epithermal IS	278	LM33a_XV_gn1	0.04	0	13.449	0	0.033	0	0	0	0.056	84.522	0.01	98.11
LM-33a	gn	epithermal IS	279	LM33a_XV_gn2	0.024	0	13.5	0	0.031	0	0.002	0.004	0.122	85.13	0.011	98.824
LM-33a	gn	epithermal IS	281	LM33a_IX_gn1	0.038	0	13.231	0.022	0.028	0	0	0	0.096	86.202	0	99.617
LM-33a	gn	epithermal IS	286	LM33a_III_gn1	0.039	0	13.201	0.055	0.081	0	0	0	0.01	86.182	0	99.568
LM-33a	gn	epithermal IS	287	LM33a_III_gn2	0.049	0	13.306	0.142	0.051	0	0	0.068	0	86.864	0	100.48
LM-33a	gn	epithermal IS	288	LM33a_III_gn3	0.036	0	13.269	0.015	0.058	0	0	0.002	0.045	85.226	0.023	98.674
LM-33a	gn	epithermal IS	294	LM33a_IV_gn1	0	0	13.086	1.069	0.017	0	0	0.562	0	85.546	0	100.28
LM-33a	gn	epithermal IS	295	LM33a_XIII_gn1	0.015	0	13.307	0.087	0.041	0	0	0.02	0.121	87.391	0.008	100.99
LM-33a	gn	epithermal IS	299	LM33a_V_gn1	0.043	0	13.327	0.033	0.056	0	0	0	0	86.649	0	100.108
LM-33a	gn	epithermal IS	304	LM33a_X_gn1	0.023	0	13.326	0.022	0.033	0	0	0	0.072	86.191	0.025	99.692
LM-33a	gn	epithermal IS	311	LM33a_XII_gn1	0.04	0	13.263	0.003	0.08	0	0	0.005	0.029	86.928	0.018	100.366
LM-27B	gn	epithermal IS	32	LM27B_XVI_gn_1	0.034	0	13.142	0.078	0.056	0	0	0	0.023	84.977	0	98.31
LM-27B	gn	epithermal IS	33	LM27B_XVI_gn_2	0.017	0	13.224	0.035	0.06	0	0	0	0.05	83.92	0.021	97.327	86.1906
LM-27B	gn	epithermal IS	34	LM27B_XVI_gn_3	0.044	0	13.188	0.01	0.081	0.004	0	0.006	0.009	84.371	0.027	97.74	86.1906
LM-27B	gn	epithermal IS	69	LM33b_X_gn_1	0.012	0	13.713	0.994	0.027	0	0	2.206	0	83.06	0.022	100.034
LM-27B	gn	epithermal IS	70	LM33b_X_gn_2	0.003	0	13.866	0.878	0.021	0	0	2.092	0	83.259	0	100.119
min					0	0	12.874	0	0.01	0	0	0	0	80.925	0
max					0.894	0	13.866	1.069	0.107	0.436	0.002	2.206	0.352	87.391	0.66
std					0.139512	0	0.187267	0.262249	0.0219294	0.0664777	0.000304997	0.459943	0.0714553	1.70195	0.10585
geo. mean					n.a.	n.a.	13.2787	n.a.	0.0438922	n.a.	n.a.	n.a.	n.a.	84.5919	n.a.
Kaspakas (wt. %)
LEM19III	gn	epithermal IS		LEM19III-I_gn_		0	13.483	0	0.073			0.072	0.076	89.104	0	102.808
LEM19III	gn	epithermal IS		LEM19III-I_gn_		0	13.271	0	0.039			0.137	0	88.666	0.052	102.165
min					0	0	13.271	0	0.039	0	0	0.072	0	88.666	0
max					0	0	13.483	0	0.073	0	0	0.137	0.076	89.104	0.052
std					n.a.	0	0.149907	0	0.0240416	n.a.	n.a.	0.0459619	0.0537401	0.309713	0.0367696
geo. mean					n.a.	n.a.	13.3766	n.a.	0.0533573	n.a.	n.a.	0.0993177	n.a.	88.8847	n.a.

## Sheet: pyrite
mineral	stage	No.	Comment	Te (wt%)	As (wt%)	S (wt%)	Cu (wt%)	Cd (wt%)	Au (wt%)	Ag (wt%)	Fe (wt%)	Sb (wt%)	Pb (wt%)	Zn (wt%)	Total (wt%)
Fakos (wt. %)
py	epithermal IS	33	LM27B_I_py_1	0.005	0.402	52.123	0.361	0.042	0	0.004	46.114	0.15	0.15	0.072	99.423
py	epithermal IS	34	LM27B_I_py_2	0	0.409	51.464	0.47	0.063	0.037	0	46.297	0.171	0.139	0.058	99.108
py	epithermal IS	43	LM27B_II_py1	0	0.005	52.997	0.205	0.042	0	0	46.317	0	0	0.043	99.609
py	epithermal IS	57	LM27B_III_py1	0.007	0.05	52.383	0.011	0.056	0	0.001	46.76	0.052	0	0.286	99.606
py	epithermal IS	58	LM27B_III_py2	0.002	0.008	52.487	0.013	0.048	0.005	0.025	45.754	0.013	0	0.005	98.36
py	epithermal IS	66	LM27B_IV_py1	0	0.031	52.387	0.034	0.036	0	0.027	47.247	0.033	0	0.088	99.883
py	epithermal IS	67	LM27B_IV_py2	0	0.018	52.589	0	0.038	0	0	47.021	0	0.013	0.026	99.705
py	epithermal IS	68	LM27B_IV_py3	0	0.034	52.303	0.023	0.053	0	0.016	47.068	0	0	0.035	99.532
py	epithermal IS	69	LM27B_IV_py4	0.019	0.039	51.944	0.036	0.045	0.023	0	46.72	0.022	0.021	0.185	99.054
py	epithermal IS	70	LM27B_IV_py5	0	0.047	52.003	0.015	0.044	0.014	0.035	46.916	0	0	0.097	99.171
py	epithermal IS	82	LM27B_XV_py1	0.01	0.029	51.057	0	0.035	0.005	0.01	46.631	0	0	0	97.777
py	epithermal IS	104	LM33b_II_py1	0	0	52.883	0.294	0.047	0.055	0.037	46.389	0.017	0	0.117	99.839
py	epithermal IS	105	LM33b_II_py2	0.069	0.009	51.975	0.257	0.045	0	0.142	46.408	0	0.075	0	98.98
py	epithermal IS	106	LM33b_II_py3	0.017	0.006	52.242	0.378	0.03	0.06	0.036	46.2	0	0	0.018	98.987
py	epithermal IS	107	LM33b_II_py4	0.007	0.024	53.047	0.259	0.023	0	0.007	46.327	0	0.12	0	99.814
py	epithermal IS	111	LM33b_VII_py1	0	0.037	52.665	0	0.056	0	0.007	46.408	0.004	0	0.13	99.307
py	epithermal IS	112	LM33b_VII_py2	0.03	0.026	52.681	0	0.051	0	0.014	46.225	0.032	0.027	0.161	99.247
py	epithermal IS	113	LM33b_VII_py3	0	0.027	52.98	0.025	0.035	0	0	46.592	0	0	0.043	99.702
py	epithermal IS	114	LM33b_VII_py4	0	0.029	53.082	0.027	0.042	0.074	0.02	45.884	0	0.016	0.056	99.23
py	epithermal IS	115	LM33b_VII_py5	0	0.022	53.275	0.001	0.046	0.051	0.009	46.433	0.004	0.085	0.161	100.087
py	epithermal IS	116	LM33b_VII_py6	0.017	0.053	52.624	0.034	0.031	0	0.011	46.733	0.013	0.019	0	99.535
py	epithermal IS	117	LM33b_VII_py7	0	0	52.825	0.029	0.06	0	0	46.295	0.027	0	0.039	99.275
py	epithermal IS	128	LM33b_VI_py1	0.006	0.015	53.55	0.043	0.039	0	0	45.797	0.004	0	1.313	100.767
py	epithermal IS	131	LM33b_VIII_py1	0	0.018	52.911	0.032	0.032	0	0.031	46.055	0	0	0.001	99.08
py	epithermal IS	135	LM33b_IV_py1	0	0.007	52.583	0.015	0.043	0	0	45.571	0	0	0.016	98.235
py	epithermal IS	136	LM33b_IV_py2	0.007	0	52.565	0.038	0.028	0	0.01	45.372	0.024	0	0	98.044
py	epithermal IS	137	LM33b_IV_py3	0.03	0.025	52.92	0.053	0.037	0	0.021	45.663	0	0.032	0.119	98.9
py	epithermal IS	138	LM33b_IV_py4	0.021	1.231	52.102	0.101	0.038	0	0	45.284	0.011	0	0	98.788
py	epithermal IS	139	LM33b_IV_py5	0	0.015	52.715	0.057	0.038	0	0	45.521	0	0.027	0.028	98.401
py	epithermal IS	140	LM33b_IV_py6	0	0.03	52.673	0.078	0.042	0	0.029	46.31	0	0.048	0	99.21
py	epithermal IS	141	LM33b_IV_py7	0	0.014	53.059	0.121	0.048	0.023	0.03	45.892	0.059	0.056	0.035	99.337
py	epithermal IS	142	LM33b_IV_py8	0.001	0.045	52.582	0.01	0.047	0.014	0.015	45.688	0.028	0.051	0.019	98.5
py	epithermal IS	143	LM33b_IV_py9	0.008	0	52.434	0.075	0.055	0	0	44.893	0	0.056	0.026	97.547
py	epithermal IS	144	LM33b_IV_py10	0.013	0.01	53.274	0.042	0.049	0.009	0	45.358	0	0	0.075	98.83
py	epithermal IS	150	LM33b_XI_py1	0.014	0.02	53.552	0.089	0.037	0	0	45.211	0	0.027	0.017	98.967
py	epithermal IS	151	LM33b_XI_py2	0	0.037	53.509	0.11	0.042	0	0.011	45.655	0.012	0.024	0.042	99.442
py	epithermal IS	152	LM33b_XI_py3	0.003	0.038	53.275	0.078	0.033	0	0.009	45.765	0.019	0.021	0.013	99.254
py	epithermal IS	153	LM33b_XI_py4	0.026	0.003	52.9	0.065	0.024	0	0	45.953	0	0	0.017	98.988
py	epithermal IS	154	LM33b_XI_py5	0.04	0.018	52.894	0.142	0.057	0.115	0	45.808	0.011	0.056	0	99.141
py	epithermal IS	155	LM33b_XI_py6	0.015	0.013	53.042	0.123	0.052	0.005	0.027	45.543	0	0	0.032	98.852
py	epithermal IS	156	LM33b_XI_py7	0.013	0.022	53.389	0.021	0.035	0.051	0	45.473	0.037	0.037	0.008	99.086
py	epithermal IS	157	LM33b_XI_py8	0.007	0.005	53.212	0.023	0.062	0	0.031	45.407	0.002	0	0.01	98.759
py	epithermal IS	162	LM33b_III_py1	0	0	53.029	0.03	0.038	0.005	0.017	45.573	0	0	0.131	98.823
py	epithermal IS	163	LM33b_III_py2	0.014	0	53.291	0.028	0.066	0	0	45.664	0	0.027	0	99.09
py	epithermal IS	164	LM33b_III_py3	0.026	0.037	53.066	0.065	0.052	0.023	0	46.013	0	0	0.033	99.315
py	epithermal IS	165	LM33b_III_py4	0.002	0	52.961	0.042	0.032	0.032	0	45.935	0.018	0	0	99.022
py	epithermal IS	166	LM33b_III_py5	0	0.002	53.101	0.027	0.051	0	0.019	45.712	0.012	0	0.002	98.926
py	epithermal IS	167	LM33b_III_py6	0	0.006	53.207	0.065	0.042	0.009	0.006	45.899	0	0	0	99.234
py	epithermal IS	168	LM33b_III_py7	0.008	0.029	53.532	0.039	0.033	0	0.01	46.313	0	0	0.003	99.967
py	epithermal IS	169	LM33b_III_py8	0	0.028	53.615	0.076	0.048	0	0	46.025	0	0.013	0.201	100.006
py	epithermal IS	170	LM33b_III_py9	0.023	0	53.209	0.032	0.049	0	0	46.477	0	0.021	0	99.811
py	epithermal IS	178	LM33b_III_py1	0.024	0.033	53.074	0.054	0.057	0	0	46.154	0.039	0.043	0.015	99.493
py	epithermal IS	179	LM33b_III_py2	0.03	0.019	53.421	0	0.051	0.037	0	46.276	0.021	0	0	99.855
py	epithermal IS	180	LM33b_III_py3	0.004	0.03	53.486	0.02	0.026	0.023	0.002	46.162	0	0	0	99.753
py	epithermal IS	181	LM33b_III_py4	0	0.027	53.432	0.017	0.06	0.014	0	45.251	0.021	0	0	98.822
py	epithermal IS	182	LM33b_III_py5	0.015	0.02	52.904	0	0.033	0.078	0	45.989	0	0	0	99.039
py	epithermal IS	183	LM33b_III_py6	0.022	0.026	52.975	0.045	0.034	0.005	0	46.141	0	0.035	0.018	99.301
py	epithermal IS	184	LM33b_III_py7	0.018	0.02	52.73	0.004	0.048	0.028	0	46.673	0.036	0.011	0	99.568
py	epithermal IS	185	LM33b_III_py8	0	0.045	52.967	0.039	0.037	0	0.025	46.002	0	0.04	0.041	99.196
py	porphyry propylitic	186	LM64_I_py1	0	0.027	52.909	0.052	0.04	0	0.004	46.514	0.043	0	0	99.589
py	porphyry propylitic	187	LM64_I_py2	0	0.016	53.139	0	0.004	0.028	0.002	46.55	0.039	0	0	99.778
py	porphyry propylitic	188	LM64_I_py3	0.004	0.038	52.876	0.004	0.053	0.005	0.001	46.248	0.001	0	0	99.23
py	porphyry propylitic	189	LM64_I_py4	0.008	0.022	53.005	0.008	0.042	0	0.029	45.864	0	0	0.003	98.981
py	porphyry propylitic	190	LM64_I_py5	0	0.016	53.23	0.012	0.055	0	0	46.255	0	0	0.014	99.582
py	porphyry propylitic	191	LM64_I_py6	0.033	0	53.445	0.002	0.043	0	0.001	46.542	0.002	0	0	100.068
py	porphyry propylitic	192	LM64_I_py7	0	0	53.169	0	0.051	0	0	45.942	0	0.021	0.008	99.191
py	porphyry propylitic	193	LM64_I_py8	0.021	0.037	52.846	0.005	0.047	0	0.017	45.911	0	0	0.014	98.898
py	porphyry propylitic	194	LM64_I_py9	0	0.038	52.569	0	0.032	0.028	0.009	46.168	0	0	0	98.844
py	porphyry propylitic	195	LM64_I_py10	0	0.036	52.993	0.001	0.044	0.046	0.01	45.132	0	0	0	98.262
py	porphyry propylitic	196	LM64_II_py1	0.018	0.007	53.141	0.005	0.041	0	0.019	46.452	0	0	0	99.683
py	porphyry propylitic	197	LM64_II_py2.1	0.001	0	53.15	0.002	0.05	0.083	0.01	46.088	0	0.027	0	99.411
py	porphyry propylitic	198	LM64_II_py2.2	0	0.019	52.878	0.024	0.04	0.018	0.011	46.1	0.012	0.016	0.037	99.155
py	porphyry propylitic	199	LM64_II_py2.3	0.006	0.008	52.592	0	0.054	0	0.028	45.998	0.037	0	0	98.723
py	porphyry propylitic	200	LM64_II_py3	0.019	0.013	52.553	0.048	0.029	0	0	45.621	0	0	0.008	98.291
py	porphyry propylitic	202	LM64_II_py5	0	0.02	53.503	0.043	0.054	0.055	0	45.999	0	0.035	0	99.709
py	porphyry propylitic	203	LM64_II_py6	0	0.958	52.871	0.018	0.052	0.051	0.012	45.879	0.019	0	0.038	99.898
py	porphyry propylitic	204	LM64_II_py7	0.018	0.001	52.89	0.007	0.04	0.018	0	46.272	0	0.019	0.023	99.288
py	porphyry propylitic	205	LM64_XII_py1	0	0.02	53.028	0	0.061	0.046	0.013	46.073	0	0.045	0.016	99.302
py	porphyry propylitic	207	LM64_XII_py3	0.014	0	53.123	0.026	0.041	0.046	0	45.87	0.008	0	0.021	99.149
py	porphyry propylitic	208	LM64_XII_py4	0	0.047	53.434	0	0.055	0.055	0.015	46.322	0.015	0	0	99.943
py	porphyry propylitic	210	LM64_XIV_py1	0.005	0.029	53.442	0.033	0.046	0	0	45.996	0.042	0	0	99.593
py	porphyry propylitic	211	LM64_XIV_py2	0	0.034	53.231	0.017	0.031	0	0	46.073	0.001	0.008	0	99.395
py	porphyry propylitic	212	LM64_XIV_py3	0	0.018	53.586	0.036	0.02	0.101	0.02	46.486	0	0	0	100.267
py	porphyry propylitic	213	LM64_XIV_py4	0.001	0.002	53.184	0.011	0.036	0	0	46.323	0.013	0	0	99.57
py	porphyry propylitic	214	LM64_XIV_py5	0.01	0	53.429	0.025	0.04	0	0.002	46.161	0	0.016	0	99.683
py	porphyry propylitic	217	LM64_XIV_py6	0.032	0.022	53.097	0.032	0.046	0.009	0.008	45.748	0	0	0.006	99
py	porphyry propylitic	218	LM64_XIV_py7	0	0.007	53.148	0.025	0.042	0.028	0.029	46.116	0.042	0	0	99.437
py	porphyry propylitic	219	LM64_III_py1	0	0.047	53.162	0	0.03	0.009	0	46.473	0.04	0	0.01	99.771
py	porphyry propylitic	220	LM64_III_py2	0.007	0.032	53.453	0	0.029	0	0.02	45.304	0.09	0	0	98.935
py	porphyry propylitic	221	LM64_III_py3	0	0.002	53.412	0.022	0.035	0	0	46.129	0.005	0	0	99.605
py	porphyry propylitic	222	LM64_III_py4	0	0.011	52.386	0.028	0.025	0	0	45.869	0	0.043	0.018	98.38
py	porphyry propylitic	223	LM64_III_py5	0.009	0.049	52.506	0.026	0.023	0.009	0	46.232	0.038	0.003	0.008	98.903
py	porphyry propylitic	228	LM64_XIII_py1	0.001	0.01	52.845	0.041	0.054	0	0.02	45.671	0.023	0	0	98.665
py	porphyry propylitic	229	LM64_XIII_py2	0	0.038	53.124	0	0.044	0	0	45.38	0.063	0	0.013	98.662
py	porphyry propylitic	230	LM64_IV_py1	0.013	0.055	52.963	0.012	0.021	0.06	0.018	45.55	0	0	0	98.692
py	porphyry propylitic	231	LM64_IV_py2	0	0.009	53.267	0.031	0.037	0	0.016	45.79	0.017	0	0	99.167
py	porphyry propylitic	232	LM64_IV_py3	0.006	0.025	53.204	0.036	0.037	0.037	0.002	45.354	0	0.008	0.012	98.721
py	porphyry propylitic	233	LM64_IV_py4	0.003	0.03	52.825	0.047	0.055	0	0	45.636	0	0.04	0	98.636
py	porphyry propylitic	234	LM64_IV_py5	0.002	0.09	52.332	0.013	0.038	0	0	45.213	0	0	0	97.688
py	porphyry propylitic	235	LM64_VI_py1	0	0.016	52.3	0	0.055	0	0	45.827	0	0.037	0	98.235
py	porphyry propylitic	236	LM64_VI_py2	0.003	0.01	52.74	0.026	0.033	0	0.008	46.672	0.014	0	0.003	99.509
py	porphyry propylitic	237	LM64_VI_py3	0	0.024	52.639	0.011	0.023	0.009	0	46.319	0.019	0.011	0	99.055
py	porphyry propylitic	238	LM64_VI_py4	0.025	0.039	52.873	0.012	0.055	0.129	0.019	46.141	0.025	0.027	0.006	99.351
py	porphyry propylitic	239	LM64_VI_py5	0	0.02	52.486	0.005	0.026	0	0	45.743	0	0	0.032	98.312
py	porphyry propylitic	240	LM64_VI_py6	0.03	0.003	52.176	0.011	0.036	0	0.014	45.647	0	0	0	97.917
py	porphyry propylitic	241	LM64_VI_py7	0.016	0.042	52.459	0.011	0.047	0	0.028	45.307	0	0.059	0	97.969
py	porphyry propylitic	242	LM64_VI_py8	0	0.007	52.534	0.004	0.036	0	0.024	46.024	0.001	0.024	0	98.654
py	porphyry propylitic	243	LM64_VI_py9	0	0.039	52.779	0.002	0.052	0.028	0	45.656	0.012	0.035	0.018	98.621
py	porphyry propylitic	244	LM64_VIII_py1	0.028	0	52.579	0.007	0.043	0	0	45.482	0	0	0.005	98.144
py	porphyry propylitic	245	LM64_VIII_py2	0	0.128	52.722	0.035	0.059	0.037	0	45.112	0.111	0	0	98.204
py	porphyry propylitic	246	LM64_VIII_py3	0.028	0.055	52.183	0.042	0.054	0.032	0	45.743	0.019	0	0	98.156
py	porphyry propylitic	247	LM64_VIII_py4	0.005	0.008	52.702	0.003	0.018	0.041	0	45.631	0.019	0.064	0.017	98.508
py	porphyry propylitic	248	LM64_VIII_py5	0	0	52.694	0.022	0.033	0.037	0	46.166	0	0	0	98.952
py	porphyry propylitic	249	LM64_VIII_py6	0	0.007	52.891	0.03	0.042	0	0	45.654	0.027	0	0	98.651
py	porphyry propylitic	250	LM64_VIII_py7	0.013	0.008	53.135	0.026	0.022	0	0	45.362	0.082	0.019	0.027	98.694
py	epithermal IS	255	LM33a_I_py1	0	0.022	53.048	0.046	0.02	0.028	0	45.343	0	0	0.096	98.603
py	epithermal IS	256	LM33a_I_py2	0.018	0.052	52.731	0.055	0.031	0	0	45.351	0	0.024	0.014	98.276
py	epithermal IS	257	LM33a_I_py3	0	0.048	53.101	0.018	0.017	0.005	0	45.446	0.026	0.059	0.003	98.723
py	epithermal IS	258	LM33a_II_py1	0.026	0.002	52.544	0.016	0.042	0.055	0	45.658	0	0.024	0	98.367
py	epithermal IS	264	LM33a_XII_py1	0	0.026	52.398	0.038	0.027	0	0	45.677	0	0.029	0.096	98.291
py	epithermal IS	265	LM33a_XII_py2	0.001	0.032	52.045	0.005	0.059	0.032	0	46.015	0	0	0.054	98.243
py	epithermal IS	266	LM33a_XII_py3	0	0.026	52.734	0.009	0.055	0	0.021	46.012	0	0	0.124	98.981
py	epithermal IS	267	LM33a_XII_py4	0.024	0.015	52.823	0.015	0.036	0	0.014	45.949	0.004	0.008	0.007	98.895
py	epithermal IS	271	LM33a_VIII_py1	0.005	0.066	52.4	0.004	0.055	0.028	0.002	46.129	0	0	0.227	98.916
py	epithermal IS	277	LM33a_VIII_py2	0	0.046	52.476	0.01	0.027	0	0.016	45.967	0.081	0.037	0.568	99.228
py	epithermal IS	289	LM33a_III_py1	0.006	0.032	53.069	0.191	0.043	0.037	0.01	45.837	0.013	0	0.037	99.275
py	epithermal IS	290	LM33a_III_py2	0.018	0.004	52.825	0.258	0.04	0.065	0.012	46.041	0.039	0.013	0.031	99.346
py	epithermal IS	291	LM33a_III_py3	0.001	0.038	53.231	0.35	0.069	0	0	44.619	0	0.069	0.001	98.378
py	epithermal IS	292	LM33a_IV_py1	0.015	0.01	52.826	0.108	0.05	0.046	0	45.86	0	0.021	0	98.936
py	epithermal IS	297	LM33a_XIII_py1	0.006	0.031	52.861	0.086	0.033	0.014	0.001	46.141	0.038	0	0.001	99.212
py	epithermal IS	298	LM33a_XIII_py2	0	0.017	53.403	0.294	0.041	0	0	45.185	0.029	0	0.013	98.982
py	epithermal IS	303	LM33a_V_py1	0	0.03	53.017	0.043	0.047	0.005	0	45.263	0	0.04	0.001	98.446
py	epithermal IS	307	LM33a_X_py1	0.013	0	52.961	0.026	0.041	0.014	0	45.315	0.004	0.064	0	98.438
py	epithermal IS	308	LM33a_XII_py1	0	0.007	53.463	0.042	0.072	0	0.008	45.456	0	0	0.004	99.052
py	epithermal IS	309	LM33a_XII_py2	0	0.018	53.586	0.033	0.054	0.046	0	45.457	0.015	0.037	0.038	99.284
py	epithermal IS	310	LM33a_XII_py3	0	0.019	53.154	0.011	0.027	0	0.056	45.669	0.008	0	0.021	98.965
py	epithermal IS	53	LM27B_VI_py_1	0	0.015	53.294	0.065	0.033	0.046	0.024	46.708	0.012	0	0.182	100.379
py	epithermal IS	54	LM27B_VI_py_2	0	0.001	53.266	0.028	0.05	0	0.019	46.923	0.033	0	0.063	100.383
py	epithermal IS	55	LM27B_VI_py_3	0.018	0	52.8	0.006	0.025	0.037	0	46.806	0	0	0.047	99.739
py	epithermal IS	56	LM27B_VI_py_4	0.003	0.016	52.78	0.052	0.038	0.023	0.016	46.942	0.058	0	0.013	99.941
py	epithermal IS	57	LM27B_VI_py_5	0.01	0.017	53.103	0.053	0.068	0.023	0.049	46.985	0.006	0	0	100.314
py	epithermal IS	58	LM27B_VI_py_6	0	0.022	53.82	0.015	0.028	0.018	0	46.549	0.004	0	0.175	100.631
py	epithermal IS	59	LM33b_X_py1	0.029	0.006	53.223	0.015	0.031	0	0	46.827	0	0	0.021	100.152
py	epithermal IS	60	LM33b_X_py2	0	0.005	52.308	0.047	0.06	0.056	0.008	46.957	0.077	0	0.011	99.529
py	epithermal IS	61	LM33b_X_py3	0	0.001	53.431	0.303	0.032	0.028	0.026	46.911	0.043	0	0	100.775
py	epithermal IS	62	LM33b_X_py4	0.002	0.019	53.428	0.309	0.032	0.042	0	47.036	0.08	0	0	100.948
py	epithermal IS	63	LM33b_X_py5	0	0.023	53.477	0.054	0.054	0	0	46.942	0	0.014	0.037	100.601
py	epithermal IS	72	LM33b_V_py_1	0	0.388	52.788	0	0.041	0.009	0	46.879	0.03	0.003	0.049	100.187
py	epithermal IS	73	LM33b_V_py_2	0	0.499	52.804	0.019	0.054	0	0	46.84	0.032	0	0	100.248
py	epithermal IS	74	LM33b_V_py_3	0	0.611	52.973	0.046	0.032	0.009	0	46.93	0.076	0	0.015	100.692
py	epithermal IS	78	LM33b_V_py_4	0	1.581	51.684	0.032	0.02	0.103	0	46.667	0.018	0.14	0.043	100.288
py	epithermal IS	79	LM33b_V_py_5	0.001	0.151	53.12	0	0.05	0.079	0	46.676	0	0	0.04	100.117
py	porphyry propylitic	82	LM64_V_py_1	0	0.073	53.634	0.01	0.05	0.023	0	46.976	0.017	0.057	0	100.84
py	porphyry propylitic	83	LM64_V_py_2	0.02	0	53.496	0	0.029	0	0.024	46.737	0	0	0.038	100.344
py	porphyry propylitic	86	LM64_V_py_3	0	0	53.64	0.007	0.061	0.125	0.002	47.148	0	0	0	100.983
py	porphyry propylitic	87	LM64_V_py_4	0	0.01	52.673	0.004	0.041	0	0	46.671	0	0	0	99.399
py	porphyry propylitic	88	LM64_V_py_5	0	0.006	53.05	0.017	0.06	0	0.049	46.654	0	0	0.015	99.851
py	porphyry propylitic	89	LM64_V_py_6	0	0.072	52.735	0	0.022	0.069	0	46.927	0.014	0	0.023	99.862
py	porphyry propylitic	90	LM64_V_py_7	0.012	0.044	52.468	0	0.051	0.023	0	46.767	0.04	0	0	99.405
py	porphyry propylitic	91	LM64_V_py_8	0	0	53.046	0	0.052	0	0	47.016	0.034	0	0.012	100.16
py	porphyry propylitic	92	LM64_V_py_9	0.013	0.005	52.777	0	0.048	0.037	0	46.719	0	0	0.016	99.615
py	porphyry propylitic	95	LM64_VII_py1	0.026	0.01	52.322	0.018	0.02	0	0.001	46.774	0.059	0	0.024	99.254
py	porphyry propylitic	96	LM64_VII_py2	0.005	0.032	52.415	0.001	0.022	0	0.001	46.916	0.03	0	0.016	99.438
py	porphyry propylitic	97	LM64_VII_py3	0.002	0.018	52.618	0.015	0.042	0.028	0.02	46.91	0.007	0	0.022	99.682
py	porphyry propylitic	98	LM64_VII_py4	0.01	0.047	52.17	0.03	0.029	0	0	46.629	0.019	0	0.014	98.948
py	porphyry propylitic	99	LM64_VII_py5	0	0.034	52.175	0.027	0.037	0	0	46.953	0	0	0.019	99.245
py	porphyry propylitic	100	LM64_VII_py6	0	0.044	52.271	0	0.054	0	0.038	46.787	0.027	0	0.001	99.222
py	porphyry propylitic	101	LM64_VII_py7	0.029	0.014	52.706	0.022	0.04	0.088	0.004	46.488	0	0.024	0	99.415
py	porphyry propylitic	102	LM64_VII_py8	0.004	0.006	51.131	0.023	0.029	0.102	0	46.834	0	0	0	98.129
py	porphyry propylitic	103	LM64_VII_py9	0.009	0	52.306	0.039	0.058	0	0.001	46.486	0	0.043	0.025	98.967
py	porphyry propylitic	104	LM64_VII_py10	0.013	0.048	52.069	0.039	0.062	0.019	0.002	46.461	0	0	0	98.713
py	porphyry propylitic	105	LM64_X_py1	0	0.011	52.309	0.015	0.034	0.074	0.032	46.542	0	0	0.015	99.032
py	porphyry propylitic	106	LM64_X_py2	0.008	0.008	52.432	0	0.059	0	0	46.881	0.068	0	0.006	99.462
py	porphyry propylitic	107	LM64_X_py3	0	0.047	52.097	0	0.06	0.051	0.007	46.712	0.087	0	0.005	99.066
py	porphyry propylitic	108	LM64_X_py4	0	0.006	51.92	0	0.033	0	0.004	46.837	0.077	0	0	98.877
py	porphyry propylitic	109	LM64_X_py5	0	0.05	52.494	0	0.049	0.037	0	46.692	0	0	0.006	99.328
py	porphyry propylitic	110	LM64_X_py6	0	0.017	52.683	0.037	0.03	0.037	0.012	46.9	0.045	0	0	99.761
py	porphyry propylitic	111	LM64_X_py7	0	0.011	51.932	0	0.067	0.019	0.042	46.599	0.018	0	0	98.688
py	porphyry propylitic	112	LM64_IX_py1.1	0	0.027	52.443	0	0.04	0	0	46.877	0	0	0	99.387
py	porphyry propylitic	113	LM64_IX_py1.2	0.002	0.014	51.985	0.015	0.053	0.019	0	46.831	0.018	0	0.006	98.943
py	porphyry propylitic	114	LM64_IX_py1.3	0	0.018	52.393	0.005	0.046	0	0.024	46.536	0	0	0.023	99.045
py	porphyry propylitic	115	LM64_IX_py1.4	0.017	0.014	52.306	0.039	0.037	0.046	0	46.915	0	0	0.011	99.385
py	porphyry propylitic	116	LM64_IX_py1.5	0	0.032	53.271	0.006	0.041	0.005	0.018	46.601	0.026	0	0.004	100.004
py	epithermal HS	133	LM29_IX_py_1.1	0.011	0.02	52.058	0.015	0.058	0	0	46.237	0	0.011	0	98.41
py	epithermal HS	134	LM29_IX_py_1.2	0	0	53.187	0.045	0.035	0.028	0	46.094	0	0.049	0.007	99.445
py	epithermal HS	135	LM29_IX_py_1.3	0.028	0.01	51.989	0.131	0.038	0.023	0	46.058	0	0	0.005	98.282
py	epithermal HS	136	LM29_IX_py_1.4	0	0	51.836	0.058	0.045	0.12	0	46.093	0	0	0	98.152
py	epithermal HS	137	LM29_IX_py_2	0	0.002	52.588	0.05	0.035	0	0	46.936	0	0	0	99.611
py	epithermal HS	140	LM29_IV_py_1	0	0.028	52.681	0.025	0.05	0.032	0.015	46.497	0	0	0.005	99.333
py	epithermal HS	141	LM29_IV_py_2	0.002	0.066	53.291	0.178	0.057	0	0	46.114	0.005	0	0.028	99.741
py	epithermal HS	143	LM29_III_py_1	0.013	0.006	53.367	0.454	0.038	0.032	0.022	46.383	0.032	0	0.019	100.366
py	epithermal HS	144	LM29_III_py_2	0	0.016	53.632	0.046	0.047	0.065	0	46.966	0	0	0.001	100.773
py	epithermal HS	145	LM29_III_py_3	0.008	0.034	53.464	0.14	0.049	0.051	0	46.886	0	0	0.028	100.66
py	epithermal HS	146	LM29_III_py_4	0	0.014	53.473	0.104	0.039	0	0.004	46.803	0.015	0.003	0.016	100.471
py	epithermal HS	147	LM29_III_py_5	0	0	53.746	0.23	0.028	0.042	0	46.658	0.035	0.038	0	100.777
py	epithermal HS	152	LM29_VI_py_1	0	0	53.402	0.152	0.056	0.074	0.011	46.298	0.005	0	0	99.998
py	epithermal HS	153	LM29_VI_py_2	0	0.051	53.992	0.031	0.031	0.009	0.007	46.49	0.081	0	0.002	100.694
py	epithermal HS	154	LM29_VI_py_3	0.028	0.027	53.686	0.028	0.054	0.078	0	46.859	0.052	0.043	0.002	100.857
py	epithermal HS	155	LM29_VI_py_4	0.004	0.031	53.549	0.211	0.026	0	0	46.594	0.026	0	0.005	100.446
py	epithermal HS	157	LM29_V_py_1.1	0	0.048	53.536	0.065	0.032	0.018	0.004	46.806	0.024	0.062	0.031	100.626
py	epithermal HS	158	LM29_V_py_1.2	0.01	0.005	53.758	0.595	0.037	0.028	0.025	46.142	0.061	0	0	100.661
py	epithermal HS	159	LM29_V_py_1.3	0	0.022	53.197	0.118	0.04	0	0.003	46.971	0	0	0.037	100.388
py	epithermal HS	160	LM29_V_py_2	0.004	0.014	53.564	0.045	0.07	0.074	0.011	46.134	0	0.003	0.015	99.934
py	epithermal HS	161	LM29_V_py_3	0.015	0.038	53.414	0.088	0.034	0.042	0.021	46.459	0.015	0	0	100.126
py	epithermal HS	162	LM29_V_py_4	0.017	0.028	53.255	0.02	0.033	0	0	46.703	0	0	0	100.056
py	epithermal HS	163	LM29_V_py_5	0.009	0	53.152	0.019	0.048	0.042	0	45.955	0.006	0.03	0.021	99.282
py	epithermal HS	164	LM29_V_py_6	0	0.041	53.795	0.074	0.025	0.037	0	46.661	0.015	0.022	0	100.67
py	epithermal HS	165	LM29_V_py_7	0.014	0.006	53.6	0.168	0.058	0.005	0	46.394	0.007	0.073	0	100.325
py	epithermal HS	168	LM29_XI_py_1	0	0.034	53.328	0.058	0.05	0.023	0.001	46.905	0	0	0.011	100.41
py	epithermal HS	169	LM29_XI_py_2	0.003	0.047	53.372	0.083	0.039	0	0	46.807	0	0	0	100.351
py	epithermal HS	170	LM29_XI_py_3	0.021	0.039	53.878	0.365	0.058	0.06	0	46.403	0.032	0.124	0.024	101.004
py	epithermal HS	171	LM29_XI_py_4	0.018	0.034	53.505	0.045	0.042	0	0.003	46.654	0.043	0	0.049	100.393
py	epithermal HS	172	LM29_XI_py_5	0	0.032	53.813	0.038	0.036	0	0	46.737	0.076	0	0	100.732
py	epithermal HS	173	LM29_XI_py_6	0.009	0.012	53.012	0.026	0.032	0.102	0.012	47.046	0.074	0	0	100.325
py	epithermal HS	174	LM29_XI_py_7	0	0.006	53.469	0.12	0.042	0.037	0.01	46.774	0	0	0.014	100.472
py	epithermal HS	175	LM29_XI_py_8	0.011	0.05	53.489	1.177	0.045	0	0.019	45.596	0.013	0.065	0.022	100.487
py	epithermal HS	176	LM29_XI_py_9	0.017	0.026	53.339	0.014	0.052	0.046	0.018	46.751	0.014	0	0	100.277
py	epithermal HS	178	LM29_VIII_py_1	0.009	0	53.522	0.056	0.038	0.028	0.007	46.527	0.007	0.022	0.007	100.223
py	epithermal HS	179	LM29_VIII_py_2	0.022	0.006	53.208	0.04	0.037	0.028	0.02	46.653	0	0.057	0.002	100.073
py	epithermal HS	180	LM29_VIII_py_3	0.01	0.029	53.122	0.055	0.037	0.055	0	46.884	0.091	0	0	100.283
py	epithermal HS	181	LM29_VIII_py_4	0.004	0.017	52.908	0.342	0.028	0	0.011	46.541	0.11	0	0.012	99.973
py	epithermal HS	184	LM29_XII_py_1	0	0.037	53.357	0.127	0.023	0.083	0	46.679	0	0	0	100.306
py	epithermal HS	185	LM29_XII_py_2	0.006	0.005	53.201	0.132	0.019	0.005	0	46.96	0	0	0.011	100.339
py	epithermal HS	186	LM29_XII_py_3	0	0.023	53.583	0.034	0.034	0	0	46.848	0.03	0	0	100.552
py	epithermal HS	187	LM29_II_py_1	0	0	53.422	0.014	0.066	0.042	0	47.058	0	0	0	100.602
py	epithermal HS	188	LM29_II_py_2	0.005	0.006	53.149	0.075	0.051	0.032	0	46.813	0	0	0.035	100.166
py	epithermal HS	189	LM29_II_py_3	0	0.006	53.453	0.015	0.054	0.055	0	47.444	0	0	0.034	101.061
py	epithermal HS	190	LM29_X_py_1	0.007	0.014	52.977	0.272	0.031	0.06	0.011	46.443	0	0	0.005	99.82
py	epithermal HS	191	LM29_X_py_2	0.002	0	52.493	0.127	0.046	0	0	46.738	0	0.016	0	99.422
py	epithermal HS	192	LM29_X_py_3	0	0.05	52.391	0.339	0.049	0	0	46.511	0.011	0	0	99.351
py	epithermal HS	193	LM29_X_py_4	0.026	0.022	53.239	0.033	0.023	0	0.01	46.797	0.014	0	0	100.164
py	epithermal HS	194	LM29_X_py_5	0.01	0.025	53.799	0.245	0.042	0.032	0	46.671	0	0	0	100.824
py	epithermal HS	195	LM29_I_py_1	0.007	0.002	53.49	0.666	0.055	0	0	46.348	0	0	0.002	100.57
py	epithermal HS	196	LM29_I_py_2	0.012	0	52.843	0.434	0.033	0.046	0	46.679	0.007	0	0.023	100.077
py	epithermal HS	197	LM29_I_py_3	0	0.009	53.097	0.028	0.057	0	0.017	47.192	0.023	0	0.005	100.428
py	epithermal HS	198	LM29_I_py_4		0.038	52.699	0.113	0.067	0.009	0	46.778	0	0.13	0	99.834
py	epithermal HS	199	LM29_I_py_5	0	0	53.413	0.097	0.05	0	0	46.639	0	0	0.001	100.2
py	epithermal HS	200	LM29_I_py_1.1	0	0.01	53.62	0.022	0.03	0	0.021	47.024	0	0	0	100.727
py	epithermal HS	201	LM29_I_py_1.2	0.003	0.024	53.22	0.049	0.04	0	0.032	47.146	0	0	0	100.514
py	epithermal HS	202	LM29_I_py_1.3	0	0.026	53.012	0.033	0.026	0.06	0	46.801	0.03	0	0	99.988
py	epithermal HS	203	LM29_I_py_1.4	0.02	0.001	52.946	0.037	0.054	0	0	46.395	0	0	0	99.453
py	epithermal HS	204	LM29_I_py_1.5	0.017	0.02	53.334	0	0.051	0.018	0.022	47.02	0	0	0.003	100.485
py	epithermal HS	205	LM29_I_py_1.6	0	0.018	53.44	0.035	0.049	0	0.003	46.832	0.03	0	0.039	100.446
py	epithermal HS	206	LM29_VII_py_1	0	0.013	54.051	0.296	0.031	0.014	0	46.741	0.018	0.065	0	101.229
py	epithermal HS	207	LM29_VII_py_2	0.011	0.029	53.569	0.774	0.042	0.023	0	46.741	0	0	0.036	101.225
py	epithermal HS	208	LM29_VII_py_3	0	0	53.319	0.021	0.043	0.009	0.025	46.736	0.044	0	0	100.197
min				0	0	51.057	0	0.004	0	0	44.619	0	0	0
max				0.069	1.581	54.051	1.177	0.072	0.129	0.142	47.444	0.171	0.15	1.313
std				0.0100059	0.152922	0.512602	0.133325	0.0120755	0.0282073	0.0141024	0.549207	0.0266476	0.0268822	0.0982568
geo. mean				n.a.	n.a.	52.9416	n.a.	0.0401676	n.a.	n.a.	46.2783	n.a.	n.a.	n.a.
Kaspakas (wt. %)
py	epithermal IS	34	LEM_18A_II_		0.034	53.441	0.021	0.035			46.557	0.037	0	0.016	100.141
py	epithermal IS	35	LEM_18A_II_		0.096	53.357	0.057	0.05			46.539	0	0.085	0	100.184
py	epithermal IS	38	LEM_18A_III_		0.036	53.7	0	0.04			46.558	0	0	0.005	100.339
py	epithermal IS	39	LEM_18A_III_		0.074	53.422	0.021	0.047			46.438	0	0.018	0	100.02
py	epithermal IS	41	LEM_18A_III_		0.672	52.863	0.013	0.05			46.1	0.039	0.086	0.034	99.857
py	epithermal IS	42	LEM_18A_IV_		0.353	53.442	0	0.046			46.391	0	0.184	0.002	100.418
py	epithermal IS	43	LEM_18A_IV_		0.005	53.492	0.02	0.062			46.547	0.05	0	0	100.176
py	epithermal IS	48	LEM_6_I_		0.024	53.711	0	0.045			46.768	0.04	0.072	0	100.66
py	epithermal IS	49	LEM_6_I_		0.014	53.757	0	0.041			46.695	0.001	0.057	0	100.565
py	epithermal IS	50	LEM_6_I_		0	53.725	0	0.039			46.578	0.002	0.075	0.045	100.464
py	epithermal IS	52	LEM_6_I_		0.017	53.557	0	0.049			46.438	0	0	0.187	100.248
py	epithermal IS	53	LEM_6_II_		0.002	53.608	0.025	0.039			46.532	0.044	0.034	0.031	100.315
py	epithermal IS	54	LEM_6_II_		0.027	53.358	0	0.045			46.639	0.01	0.083	0	100.162
py	epithermal IS	57	LEM_6_II_		0.07	53.306	0.006	0.04			46.803	0.03	0	0.007	100.262
py	epithermal IS	58	LEM_6_III_		0.017	53.702	0	0.038			46.797	0.028	0	0.032	100.614
py	epithermal IS	60	LEM_6_III_		0	53.365	0	0.033			46.752	0	0.049	0	100.199
py	epithermal IS	63	LEM_6_III_		0.006	53.571	0.002	0.068			46.712	0.021	0.023	0	100.403
py	epithermal IS	64	LEM_6_V_		0	53.66	0	0.044			46.716	0	0.047	0.008	100.475
py	epithermal IS	66	LEM_6_V_		0	53.4	0.004	0.051			46.284	0	0.026	0.001	99.766
py	epithermal IS	67	LEM_6_V		0.016	53.402	0	0.033			46.956	0	0.01	0	100.417
py	epithermal IS	25	LEM19III-I_1		0.037	48.748	0.012	0.032			48.168	0	0.094	0	97.091
py	epithermal IS	26	LEM19III-I_2		0	52.643	0.009	0.047			46.857	0	0.052	0.007	99.615
py	epithermal IS	28	LEM19III-I_4		0.025	53.526	0	0.054			46.872	0.009	0	0.02	100.506
py	epithermal IS	29	LEM19III-I_5		0.034	53.565	0	0.036			46.597	0.015	0.028	0.035	100.31
py	epithermal IS	30	LEM19III-I_6		0.011	53.663	0.007	0.045			46.566	0.037	0	0.017	100.346
py	epithermal IS	31	LEM19III-I_7		0.013	53.736	0.02	0.03			46.828	0	0	0.025	100.652
py	epithermal IS	33	LEM19III-I_9		0.035	52.793	0.021	0.055			46.624	0.06	0.021	0	99.609
py	epithermal IS	37	LEM19III-IV_		0.011	53.653	0	0.05			46.601	0.006	0	0.004	100.325
py	epithermal IS	38	LEM19III-IV		0.031	53.461	0.046	0.06			46.179	0.018	0	0.015	99.81
py	epithermal IS	39	LEM19III-IV		0.021	53.994	0.009	0.053			46.027	0	0.015	0	100.119
py	epithermal IS	40	LEM19III-IV		0.033	53.129	0	0.042			46.31	0	0.147	0.056	99.717
py	epithermal IS	41	LEM19III-IV		0.02	53.926	0.027	0.043			46.775	0	0	0.039	100.83
py	epithermal IS	50	LEM19III-II_		0.067	53.711	0	0.065			46.614	0.005	0.005	0.032	100.499
py	epithermal IS	51	LEM19III-II_		0.007	53.853	0	0.046			46.83	0.018	0.013	0	100.767
py	epithermal IS	52	LEM19III-II_		0.063	53.938	0	0.041			46.846	0.028	0	0.021	100.937
py	epithermal IS	53	LEM19III-II_		0	53.719	0.035	0.058			46.922	0.002	0	0	100.736
py	epithermal IS	54	LEM19III-II_		0.028	53.692	0.02	0.033			46.71	0	0	0.009	100.492
py	epithermal IS	55	LEM19III-II_		0.012	53.891	0	0.042			46.664	0.021	0	0.047	100.677
py	epithermal IS	56	LEM19III-II_		0.025	53.714	0.008	0.055			46.269	0.025	0.015	0	100.111
py	epithermal IS	65	LEM19III-III_		0.027	53.472	0	0.049			46.473	0	0.085	0.008	100.114
py	epithermal IS	66	LEM19III-III_		0.014	53.779	0.007	0.021			46.256	0.038	0	0.006	100.121
py	epithermal IS	67	LEM19III-III_		0.015	53.568	0	0.039			46.658	0	0.083	0	100.363
py	epithermal IS	69	LEM19III-III_		0.01	53.65	0.016	0.03			46.395	0.025	0	0	100.126
py	epithermal IS	70	LEM19III-III_		0.149	53.824	0.008	0.055			46.671	0	0	0	100.707
py	epithermal IS	72	LEM19III-III_		0.014	53.93	0.038	0.061			46.524	0.012	0	0	100.579
py	epithermal IS	73	LEM19III-III_		0.004	53.527	0.042	0.025			46.641	0.038	0.01	0	100.287
py	epithermal IS	74	LEM19III-III_		0.022	53.8	0.011	0.04			46.473	0	0	0	100.346
py	epithermal IS	75	LEM19III-III_		0.015	53.54	0.025	0.038			46.328	0	0.049	0	99.995
py	epithermal IS	76	LEM19III-III_		0	53.756	0	0.059			46.634	0	0.021	0	100.47
py	epithermal IS	110	LEM19III_II		0.354	53.054	0.011	0.048			46.443	0.047	0	0	99.957
py	epithermal IS	111	LEM19III_II		0.53	52.642	0.009	0.034			46.505	0	0.228	0.066	100.014
py	epithermal IS	115	LEM19III_I_		0.016	53.853	0.003	0.03			46.596	0.012	0.01	0.603	101.123
py	epithermal IS	116	LEM19III_I_		0.029	53.457	0.024	0.042			45.76	0	0.147	0.004	99.463
py	epithermal IS	68	LEM19III-III_		0	54.048	0.023	0.066			46.584	0.014	0.021	0.001	100.757
py	epithermal IS	71	LEM19III-III_		0.027	54.072	0.012	0.03			46.666	0.018	0.021	0.001	100.847
min				0	0	48.748	0	0.021	0	0	45.76	0	0	0
max				0	0.672	54.072	0.057	0.068	0	0	48.168	0.06	0.228	0.603
std				n.a.	0.126857	0.72224	0.0136654	0.0107356	n.a.	n.a.	0.316144	0.0168307	0.0503434	0.0844406
geo. mean				n.a.	n.a.	53.4707	n.a.	0.0432165	n.a.	n.a.	46.5929	n.a.	n.a.	n.a.
Sardes (wt. %)
py	porphyry potassic	120	LEM35_I		0.008	53.468	0.011	0.064			46.719	0	0	0	100.27
py	porphyry potassic	121	LEM35_I		0.027	51.555	2.976	0.057			45.218	0	0	0	99.833
py	porphyry potassic	123	LEM35_I		0.029	53.529	0.001	0.043			46.405	0	0	0.001	100.008
py	porphyry potassic	126	LEM35_II_		0.012	49.873	6.197	0.055			43.074	0	0.053	0	99.264
py	porphyry potassic	127	LEM35_II_		0	53.45	0.036	0.044			46.523	0.021	0	0.004	100.078
py	porphyry potassic	129	LEM35_II_		0.014	53.61	0.043	0.038			46.385	0	0.031	0.006	100.127
py	porphyry potassic	130	LEM35_III_		0.002	53.359	0.007	0.046			46.773	0.028	0	0	100.215
py	porphyry potassic	132	LEM35_III_		0.042	53.049	0	0.044			46.156	0	0	0.018	99.309
py	porphyry potassic	134	LEM35_III_		0.02	53.546	0.011	0.034			46.627	0	0.003	0.006	100.247
py	porphyry potassic	136	LEM35_III_		0.029	53.178	0.014	0.038			46.777	0	0.072	0	100.108
py	porphyry potassic	139	LEM35_III_		0.01	53.266	0.008	0.041			46.612	0	0.005	0	99.942
py	porphyry potassic	141	LEM35_III_		0.044	53.24	0	0.072			46.376	0.055	0	0.02	99.807
py	porphyry potassic	142	LEM35_III_		0.018	53.819	0.022	0.045			46.595	0	0	0	100.499
py	porphyry potassic	144	LEM35_III_		0.033	53.27	0.004	0.033			46.363	0	0.106	0	99.809
py	porphyry potassic	145	LEM35_III_		0.039	53.349	0.027	0.058			46.512	0	0	0	99.985
py	porphyry potassic	146	LEM35_III_		0	53.252	0.014	0.044			46.29	0.045	0	0	99.645
py	porphyry potassic	148	LEM35_III_		0.039	53.129	0.027	0.055			46.435	0	0.013	0.012	99.71
py	porphyry potassic	149	LEM35_III_		0.016	53.384	0	0.036			46.083	0	0	0	99.519
py	epithermal IS	78	LEM33_I_		0.052	53.437	0	0.029			46.338	0.029	0	0	99.885
py	epithermal IS	79	LEM33_I_		0.14	53.626	0	0.048			46.335	0	0.015	0	100.164
py	epithermal IS	80	LEM33_I_		0.015	53.878	0.02	0.031			46.239	0.015	0	0.015	100.213
py	epithermal IS	83	LEM33_II_		0.934	53.042	0.017	0.066			45.941	0.169	0.01	0.004	100.183
py	epithermal IS	84	LEM33_II_		0.049	53.137	0.017	0.032			46.355	0.017	0.003	0.01	99.62
py	epithermal IS	88	LEM33_II_		0.061	53.318	0.022	0.045			46.406	0.007	0	0.005	99.864
py	epithermal IS	96	LEM33_II_		0.039	53.403	0.066	0.041			46.042	0	0	0.013	99.604
py	epithermal IS	99	LEM33_III_		0.1	53.139	0.038	0.029			46.073	0.084	0.08	0.019	99.562
py	epithermal IS	100	LEM33_III_		0.005	53.054	0.016	0.045			45.776	0	0.036	0	98.932
py	epithermal IS	101	LEM33_III_		0.047	53.463	0.023	0.042			46.262	0	0	0	99.837
py	epithermal IS	28	LEM_33I_IV_		0.034	53.403	0.02	0.019			45.457	0	0	0.001	98.934
py	epithermal IS	29	LEM_33I_IV_		0	53.227	0	0.029			45.884	0	0	0	99.14
py	epithermal IS	30	LEM_33I_IV_		0.021	53.293	0.012	0.032			45.983	0	0	0	99.341
py	epithermal IS	102	LEM33_III_		0.104	53.461	0	0.057			46.77	0.071	0.041	0.009	100.513
min				0	0	49.873	0	0.019	0	0	43.074	0	0	0	98.932
max				0	0.934	53.878	6.197	0.072	0	0	46.777	0.169	0.106	0.02	100.513
std				n.a.	0.162244	0.714027	1.19629	0.0121761	n.a.	n.a.	0.671983	0.0355558	0.0273917	0.00646571	0.414917
geo. mean				n.a.	n.a.	53.1892	n.a.	0.0418333	n.a.	n.a.	46.1759	n.a.	n.a.	n.a.	99.8169

## Sheet: chalcopyrite
Sample	Mineral	stage	No	Spot name	Te	As	S	Cu	Cd	Au	Ag	Fe	Sb	Pb	Zn	Total
Fakos (wt. %)
LM-27B	ccp	epithermal IS	64	LM27B_VIII_cpy1	0	0	34.247	34.657	0.049	0	0.052	29.988	0	0.044	1.225	100.262
LM-27B	ccp	epithermal IS	65	LM27B_VIII_cpy2	0.015	0.034	34.335	34.907	0.031	0.016	0.001	30.202	0	0.065	0.994	100.6
LM-27B	ccp	epithermal IS	91	LM27B_VII_cp1	0	0.041	34.376	34.258	0.038	0.005	0	29.053	0	0.062	1.603	99.436
LM-33	ccp	epithermal IS	101	LM33b_II_cpy1	0	0	34.684	35.215	0.038	0.099	0.006	30.231	0	0.062	0.005	100.34
LM-33	ccp	epithermal IS	102	LM33b_II_cpy2	0.002	0.027	34.832	35.044	0.044	0	0.044	30.157	0	0.044	0	100.194
LM-33	ccp	epithermal IS	103	LM33b_II_cpy3	0	0	35.451	35.421	0.041	0.052	0.001	30.542	0	0.047	0	101.555
LM-33	ccp	epithermal IS	129	LM33b_VIII_cpy1	0.033	0.017	35.068	34.792	0.06	0.047	0.019	29.439	0	0	0	99.475
LM-33	ccp	epithermal IS	130	LM33b_VIII_cpy2	0.003	0.002	34.83	34.634	0.054	0	0.015	29.374	0	0	0.035	98.947
LM-33	ccp	epithermal IS	147	LM33b_IV_cpy1	0	0	34.513	34.797	0.065	0	0	29.347	0	0.041	0	98.763
LM-33	ccp	epithermal IS	148	LM33b_IV_cpy2	0.029	0	34.288	35.14	0.05	0.083	0.027	29.665	0	0.161	0	99.443
LM-33	ccp	epithermal IS	149	LM33b_IV_cpy3	0.002	0	34.553	34.747	0.048	0	0.012	29.363	0	0	0.028	98.753
LM-33	ccp	epithermal IS	158	LM33b_XI_cpy1	0	0.017	34.526	34.868	0.067	0	0.037	29.685	0	0.064	0	99.264
LM-33	ccp	epithermal IS	159	LM33b_XI_cpy2	0	0.029	34.61	35.201	0.054	0	0.003	29.48	0	0	0	99.377
LM-33	ccp	epithermal IS	160	LM33b_XI_cpy3	0.026	0	34.532	35.254	0.051	0	0.029	29.735	0	0	0.021	99.648
LM-33	ccp	epithermal IS	161	LM33b_XI_cpy4	0	0	34.96	34.956	0.049	0	0.021	29.905	0	0	0.026	99.917
LM-33	ccp	epithermal IS	172	LM33b_III_cpy1	0.029	0	35.029	34.957	0.034	0.052	0	29.896	0	0.023	0	100.02
LM-33	ccp	epithermal IS	173	LM33b_III_cpy2	0.032	0	34.905	34.991	0.021	0.016	0.013	30.106	0	0	0	100.084
LM-33	ccp	epithermal IS	174	LM33b_III_cpy3	0	0	35.087	35.096	0.043	0.052	0	30.085	0	0	0.003	100.366
LM-33	ccp	epithermal IS	175	LM33b_III_cpy4	0.007	0.009	35.029	34.624	0.031	0.021	0.019	29.666	0	0	0.037	99.443
LM-33	ccp	epithermal IS	280	LM33a_XV_py1	0.009	0	34.093	34.526	0.036	0	0	29.424	0	0.006	0.011	98.105
LM-33	ccp	epithermal IS	282	LM33a_IX_py1	0	0.006	34.25	35.084	0.035	0.031	0.01	29.916	0	0	0	99.332
LM-33	ccp	epithermal IS	284	LM33a_III_cpy2	0.024	0	34.861	34.527	0.041	0.109	0.016	29.447	0	0.05	0	99.075
LM-33	ccp	epithermal IS	285	LM33a_III_cpy3	0	0	34.542	34.781	0.045	0	0.025	29.55	0	0	0.02	98.963
LM-33	ccp	epithermal IS	293	LM33a_IV_cpy1	0.001	0	34.139	34.999	0.034	0	0.029	29.69	0	0	0.017	98.909
LM-33	ccp	epithermal IS	296	LM33a_XIII_cpy1	0	0.005	34.707	34.644	0.035	0	0	29.557	0	0	0.018	98.966
LM-33	ccp	epithermal IS	301	LM33a_V_cpy1	0	0	34.703	34.529	0.051	0.026	0.007	29.492	0	0	0.016	98.824
LM-33	ccp	epithermal IS	305	LM33a_X_cpy1	0.016	0	34.74	34.728	0.038	0	0.011	29.464	0	0.026	0.111	99.134
LM-33	ccp	epithermal IS	312	LM33a_XII_cp1	0.009	0.015	34.835	34.59	0.028	0	0.006	29.535	0	0.044	0.067	99.129
LM-27B	ccp	epithermal IS	40	LM27B_VI_cpy1	0	0.046	34.738	34.809	0.051	0.021	0	30.104	0	0.071	0.279	100.119
LM-27B	ccp	epithermal IS	41	LM27B_VI_cpy2	0	0.032	34.624	35.214	0.049	0.026	0	30.215	0	0	0.13	100.29
LM-27B	ccp	epithermal IS	46	LM27B_VI_cpy3	0.008	0	34.725	34.85	0.052	0.031	0.024	29.568	0	0.122	0.171	99.551
LM-27B	ccp	epithermal IS	52	LM27B_VI_cpy_4	0.03	0	34.685	35.23	0.04	0	0.019	30.067	0	0.03	0.02	100.121
LM-33	ccp	epithermal IS	64	LM33b_X_cpy_1	0	0.016	34.492	35.311	0.042	0	0.025	30.159	0	0	0	100.045
LM-33	ccp	epithermal IS	65	LM33b_X_cpy_2	0.029	0	34.256	35.326	0.041	0.052	0.002	30.034	0	0.098	0	99.838
LM-33	ccp	epithermal IS	66	LM33b_X_cpy_3	0	2.302	33.024	35.741	0.055	0	0.701	26.083	0.271	0.015	0.941	99.133
min					0	0	33.024	34.258	0.021	0	0	26.083	0	0	0
max					0.033	2.302	35.451	35.741	0.067	0.109	0.701	30.542	0.271	0.161	1.603
std					0.0120313	0.387872	0.408074	0.311489	0.010277	0.0300419	0.116939	0.709322	0.0458074	0.0394839	0.388701
geo. mean					n.a.	n.a.	34.6053	34.9257	0.042811	n.a.	n.a.	29.6548	n.a.	n.a.	n.a.
Kaspakas (wt. %)
LEM 18A	ccp	epithermal IS	7	LEM_18A_II_		0	34.63	34.183	0.04		30.002		0	0.057	0	98.912
LEM 18A	ccp	epithermal IS	44	LEM_18A_IV_		0	34.871	33.933	0.04		30.189		0	0.011	0	99.044
min					0	0	34.63	33.933	0.04	0	30.002	0	0	0.011	0
max					0	0	34.871	34.183	0.04	0	30.189	0	0	0.057	0
std					n.a.	0	0.170413	0.176777	0	n.a.	0.132229	n.a.	0	0.0325269	0
geo. mean					n.a.	n.a.	34.7503	34.0578	0.04	n.a.	30.0954	n.a.	n.a.	0.02504	n.a.
Sardes (wt. %)
LEM 35	ccp	porphyry potassic	124	LEM35_I		0	43.019	18.212	0.041		38.585		0	0	0.066	99.923
Lem35	ccp	porphyry potassic	125	LEM35_II_		0.003	34.712	34.55	0.026		30.021		0	0.077	0	99.389
min					0	0	34.712	18.212	0.026	0	30.021	0	0	0	0
max					0	0.003	43.019	34.55	0.041	0	38.585	0	0	0.077	0.066
std					n.a.	0.00212132	5.87394	11.5527	0.0106066	n.a.	6.05566	n.a.	0	0.0544472	0.046669
geo. mean					n.a.	n.a.	38.6429	25.0843	0.0326497	n.a.	34.0347	n.a.	n.a.	n.a.	n.a.

## Sheet: arsenopyrite
Sample	Mineral	stage	No	Spot name	Te	As	S	Cu	Cd	Au	Fe	Ag	Sb	Pb	Zn	Total
Sardes (wt. %)
LEM_33	apy	epithermal IS-LS	26	LEM_33I_II		34.593	27.526	0.011	0.025		36.818		0.47	0.14	0.022	99.605
LEM_33	apy	epithermal IS-LS	27	LEM_33I_II		40.483	23.824	0.021	0.024		36.121		0.51	0	0	100.983
LEM_33	apy	epithermal IS-LS	85	LEM33_II_		40.392	23.818	0.019	0.058		36.075		0.991	0.003	0	101.356
LEM_33	apy	epithermal IS-LS	93	LEM33_II_		39.554	24.208	0.025	0.02		36.144		0.89	0	0.001	100.842
LEM_33	apy	epithermal IS-LS	98	LEM33_III_		39.729	23.103	0.023	0.035		35.832		0.774	0.127	0	99.623
LEM_33	apy	epithermal IS-LS	103	LEM33_III_		39.492	24.082	0.024	0.065		35.949		0.367	0.199	0	100.178
min					0	34.593	23.103	0.011	0.02	0	35.832	0	0.367	0	0	99.605
max					0	40.483	27.526	0.025	0.065	0	36.818	0	0.991	0.199	0.022	101.356
std					n.a.	2.21942	1.56577	0.00512835	0.0191146	n.a.	0.344673	n.a.	0.252829	0.0879532	0.0089088	0.738701
geo. mean					n.a.	38.9847	24.3873	0.0198171	0.0341401	n.a.	36.1551	n.a.	0.625782	n.a.	n.a.	100.429

## Sheet: sulfosalts
Sample	No.	Mineral	stage	Te	As	S	Cu	Cd	Au	Ag	Fe	Sb	Pb	Zn	Total			Cu(A)	Ag	Cu(B)	Fe	Zn	As	Cd	Sb	Te	Pb	Au	S
Fakos (wt. %)																		apfu (29)
LM-27B	30	ttr	epithermal IS	0	2.66	25.1	39.85	0.08	0.01	0.25	1.46	26.54	0.04	6.19	102.18			9.963	0.037	0.212	0.424	1.537	0.577	0.011	3.536	0	0.003	0	12.7
LM-27B	31	ttr	epithermal IS	0	2.66	25.16	39.97	0.08	0	0.23	1.68	26.01	0.06	5.94	101.8			9.965	0.035	0.243	0.488	1.476	0.577	0.011	3.467	0	0.005	0	12.734
LM-27B	32	ttr	epithermal IS	0	2.15	25.1	39.7	0.09	0	0.27	1.48	27.03	0	6.17	101.98			9.959	0.041	0.205	0.431	1.534	0.466	0.013	3.611	0	0	0	12.738
LM-27B	47	ttr	epithermal IS	0	2.16	24.99	39.64	0.06	0	0.19	1.52	26.3	0.07	6.43	101.37			9.972	0.028	0.213	0.444	1.605	0.472	0.009	3.527	0	0.006	0	12.725
LM-27B	48	ttr	epithermal IS	0	2.44	24.93	39.55	0.07	0	0.22	1.39	25.8	0	6.37	100.75			9.967	0.033	0.234	0.407	1.597	0.533	0.01	3.474	0	0	0	12.744
LM-27B	49	ttr	epithermal IS	0	2.4	25.37	39.74	0.09	0.03	0.18	1.32	26.23	0.01	6.36	101.73			9.972	0.028	0.171	0.383	1.578	0.519	0.013	3.494	0	0.001	0.003	12.837
LM-27B	95	ttr	epithermal IS	0	2.7	24.85	39.43	0.1	0	0.35	1.85	26.46	0	6.28	102.03			9.947	0.053	0.15	0.539	1.563	0.586	0.015	3.537	0	0	0	12.61
LM-33a	272	ttr	epithermal IS	0	5.84	25.3	36.91	0.2	0	3.91	1.19	20.74	0	7.7	102.03			9.384	0.585	0	0.344	1.902	1.258	0.028	2.752	0	0	0	12.747
LM-33a	300	ttr	epithermal IS	0	7.22	24.33	26.44	0.43	0	18.79	0.94	16.82	0.09	6.11	102.03			7.107	2.975	0	0.287	1.596	1.646	0.065	2.36	0	0.008	0	12.957
LM-29	166	tnt	epithermal HS	0	15.52	32.3	47	0.02	0.1	0.07	3.25	2.84	0	0.01	102.03			9.991	0.009	0.536	0.828	0.003	2.949	0.003	0.332	0	0	0.007	14.341
LM-29	110	tnt	epithermal HS	n.a.	15.556	32.166	46.567	0.03	n.a.	n.a.	3.099	3.175	0.024	0.015	100.632			10	n.a.	0.490129	0.794358	0.00328446	2.97248	0.00382063	0.373299	n.a.	0.00165821	n.a.	14.361
LM-29	121	tnt	epithermal HS	n.a.	11.684	27.299	43.307	0.152	n.a.	n.a.	4.54	10.194	0	0.213	97.389			10	n.a.	0.634102	1.2685	0.0508385	2.43362	0.0211007	1.30647	n.a.	0	n.a.	13.2854
LM-29	120	en	epithermal HS	n.a.	19.056	33.283	47.637	0.044	n.a.	n.a.	1.551	0.309	0.015	0	101.895			–	–	–	–	–	–	–	–	–	–	–	–

## Sheet: 2020-05-26_Fakos_kraw
K-raw (intensity ratio)	Group : Haase	Sample : 20200526_MK	Page	1
No.	Te	As	S	Cu	Cd	Au	Ag	Fe	Sb	Pb	Zn	Total	Comment
1	100.104	0	0.047	0	0.809	0	100.422	0	0	0.043	0.011	201.436	Std_Ag2Te_1
2	101.479	0	0.029	0.063	0.774	0	100.092	0	0	0	0	202.437	Std_Ag2Te_2
3	100.96	0	0.039	0.007	0.815	0	100.174	0.024	0	0	0.056	202.075	Std_Ag2Te_3
4	0	102.089	0	0	0.17	0	0	0.089	0	0.059	0.072	102.479	Std_InAs_1
5	0	102.355	0	0.018	0.168	0	0	0.023	0	0	0	102.564	Std_InAs_2
6	0	100.586	0.002	0.047	0.198	0.034	0	0.015	0	0.066	0.031	100.979	Std_InAs_3
7	0.01	0.016	98.479	0.084	0.053	0.042	0	100.761	0.065	0.062	0	199.572	Std_FeS2_1
8	0.063	0.011	98.654	0	0.064	0	0	101.346	0.124	0.027	0.007	200.296	Std_FeS2_2
9	0	0	97.591	0.009	0.039	0.076	0	101.264	0.13	0.039	0.004	199.152	Std_FeS2_3
10	0.05	0	58.888	100.592	0.049	0	0.035	70.661	0	0.168	0	230.443	Std_cpy_1
11	0	0	58.351	100.565	0.038	0	0.022	70.397	0	0	0.008	229.381	Std_cpy_2
12	0.113	0	58.566	100.988	0.037	0	0.015	71.559	0	0	0	231.278	Std_cpy_3
13	0	0.051	43.096	0.103	98.42	0	0	0.027	0	0	0.023	141.72	Std_CdS_1
14	0	0	43.382	0.164	98.558	0.053	0.018	0	0	0	0	142.175	Std_CdS_2
15	0	0	43.373	0.032	97.844	0	0.006	0	0	0	0.03	141.285	Std_CdS_3
16	0	0	0	0.957	0.072	100.613	0.003	0	0	0	0	101.645	Std_Au_1
17	0.076	0	0	1.051	0.067	100.194	0	0.072	0.145	0	0	101.605	Std_Au_2
18	0.057	0.058	0	0.888	0.096	100.073	0.059	0	0.013	0	0	101.244	Std_Au_3
19	0	1.821	0	0	0.157	0	0	0.045	100.76	0	0.001	102.784	Std_InSb_1
20	0	1.736	0	0.13	0.209	0	0	0	102.543	0.105	0.063	104.786	Std_InSb_2
21	0	1.702	0	0	0.194	0.038	0	0.05	101.188	0.078	0	103.25	Std_InSb_3
22	108.487	0	0	0.075	0.032	0	0	0	0	94.536	0.063	203.193	Std_PbTe_1
23	108.164	0	0	0.018	0.067	0	0	0.006	0	95.064	0.026	203.345	Std_PbTe_2
24	107.704	0	0	0.081	0.085	0	0	0.075	0	94.775	0	202.72	Std_PbTe_3
25	0.058	0	50.964	0.019	0.037	0	0	0	0.027	0	100.633	151.738	Std_sph_1
26	0.023	0	51.065	0.013	0.045	0	0.016	0	0	0.097	100.515	151.774	Std_sph_2
27	0.017	0	51.612	0.138	0.049	0.023	0	0	0.074	0	99.992	151.905	Std_sph_3
28	0.1	0	11.911	0.596	0.05	0	0	0.037	0.126	105.449	0.1	118.369	LM27B_I_plat_1
29	0.016	0	11.254	1.086	0.052	0	0	0.045	0	104.606	0.131	117.19	LM27B_I_plat_2
30	0	4.303	41.273	122.091	0.09	0.004	0.316	3.419	50.769	0.055	9.497	231.817	LM27B_I_bou_1
31	0	4.303	41.372	122.38	0.088	0	0.296	3.93	49.734	0.082	9.107	231.292	LM27B_I_bou_2
32	0	3.457	41.376	121.552	0.108	0	0.342	3.462	51.739	0	9.446	231.482	LM27B_I_bou_3
33	0.013	0.915	97.041	0.995	0.044	0	0.004	99.272	0.267	0.218	0.099	198.868	LM27B_I_py_1
34	0	0.927	95.649	1.297	0.067	0.03	0	99.751	0.305	0.203	0.08	198.309	LM27B_I_py_2
35	0	0.67	36.778	48.245	0.07	0	0	0.492	42.312	61.903	0.45	190.92	LM27B_I_ttr_1
36	0	1.696	36.554	47.823	0.082	0	0	0.232	40.606	59.807	0.378	187.178	LM27B_I_ttr_2
37	0.473	0	28.084	0.792	0.105	0	0	0.105	0	136.762	0.092	166.413	LM27B_I_gn1
38	0.209	0	28.199	1.338	0.062	0	0	0.385	0.361	140.299	0.13	170.983	LM27B_I_gn2
39	0.67	0	28.232	2.01	0.059	0	0	0.22	0	137.972	0.21	169.373	LM27B_I_gn3
40	0	0	50.831	1.198	0.502	0.023	0.004	1.666	0	0.09	96.865	151.179	LM27B_I_sph1
41	0	0.018	50.478	2.063	0.46	0	0	1.952	0	0.136	95.27	150.377	LM27B_I_sph2
42	0	0.005	51.053	4.256	0.471	0	0.013	3.019	0	0.019	93.258	152.094	LM27B_I_sph3
43	0	0.011	99.046	0.565	0.045	0	0	99.562	0	0	0.059	199.288	LM27B_II_py1
44	0.519	0	28.551	0.649	0.052	0	0	0.051	0.008	139.147	0	168.977	LM27B_II_gn1
45	2.301	0	27.915	0.258	0.045	0.413	0	0.044	0.589	135.284	0	166.849	LM27B_II_gn2
46	0.064	0	11.547	0.016	0.056	0	0	0	0.08	104.238	0	116.001	LM27B_II_unknown_1
47	0	3.479	41.142	121.358	0.072	0	0.238	3.558	50.335	0.094	9.847	230.123	LM27B_II_ttr1
48	0	3.922	40.979	121.084	0.08	0	0.273	3.252	49.34	0	9.761	228.691	LM27B_II_ttr2
49	0	3.869	41.752	121.64	0.106	0.023	0.231	3.087	50.135	0.016	9.74	230.599	LM27B_II_ttr3
50	0	0	12.155	0.164	0.021	0	0	0.415	0	102.807	0	115.562	LM27B_II_unknown2
51	0.023	0	51.14	0.354	0.444	0	0	1.117	0.105	0.055	98.268	151.506	LM27B_III_sph1
52	0	0	51.346	0.19	0.447	0	0.032	1.496	0.09	0	98.38	151.981	LM27B_III_sph2
53	0.027	0.011	50.6	0.28	0.452	0.015	0.015	1.639	0.002	0.074	98.285	151.4	LM27B_III_sph3
54	0	0	50.752	0.138	0.44	0	0	1.423	0	0.043	97.607	150.403	LM27B_III_sph4
55	0.057	0	28.626	0.031	0.065	0	0	0.039	0	139.049	0.041	167.908	LM27B_III_gn1
56	0.109	0	28.855	0	0.02	0	0	0.074	0.279	138.08	0	167.417	LM27B_III_gn2
57	0.019	0.113	97.698	0.031	0.059	0	0.001	100.598	0.092	0	0.395	199.006	LM27B_III_py1
58	0.006	0.018	98.176	0.037	0.051	0.004	0.028	98.3	0.023	0	0.007	196.65	LM27B_III_py2
59	0.11	0	28.259	0	0.083	0	0	0	0.122	137.413	0.012	165.999	LM27B_III_gn3
60	0	0	50.864	1.934	0.464	0	0.038	1.603	0.116	0.019	97.683	152.721	LM27B_VIII_sp1
61	0	0	51.578	1.354	0.417	0	0	1.385	0	0	97.18	151.914	LM27B_VIII_sp2
62	0.012	0	50.933	1.395	0.438	0	0.011	1.325	0	0.008	97.213	151.335	LM27B_VIII_sp3
63	0	0.029	50.771	0.731	0.476	0	0	1.856	0.011	0.023	97.543	151.44	LM27B_VIII_sp4
64	0	0	57.828	100.263	0.055	0	0.063	69.874	0	0.058	1.773	229.914	LM27B_VIII_cpy1
65	0.044	0.058	57.975	100.988	0.034	0.011	0.001	70.375	0	0.086	1.438	231.01	LM27B_VIII_cpy2
66	0	0.071	97.721	0.092	0.038	0	0.031	101.654	0.059	0	0.122	199.788	LM27B_IV_py1
67	0	0.04	98.198	0	0.04	0	0	101.119	0	0.019	0.037	199.453	LM27B_IV_py2
68	0	0.078	97.602	0.063	0.056	0	0.018	101.251	0	0	0.048	199.116	LM27B_IV_py3
69	0.051	0.087	96.852	0.098	0.047	0.019	0	100.532	0.04	0.031	0.256	198.013	LM27B_IV_py4
70	0	0.107	96.988	0.041	0.046	0.011	0.04	100.944	0	0	0.134	198.311	LM27B_IV_py5
71	0.077	0	50.469	2.988	0.446	0	0	3.351	0.004	0.062	94.771	152.168	LM27B_IV_sp1
72	0.031	0	50.452	2.125	0.451	0	0	1.667	0	0	96.984	151.71	LM27B_IV_sp2
73	0.021	0	51.244	4.201	0.458	0	0	2.832	0	0	97.257	156.013	LM27B_IV_sp3
74	0.117	0	50.23	0.392	0.533	0	0.028	1.683	0	0.047	97.946	150.976	LM27B_IV_sp4
75	0.126	0	28.022	0.104	0.073	0	0	0	0	138.417	0	166.742	LM27B_XVII_gn1
76	0.096	0	27.888	0.168	0.04	0	0	0.037	0	137.415	0.003	165.647	LM27B_XVII_gn2
77	0	0.055	49.605	0.116	0.562	0.034	0.06	1.638	0	0.031	97.797	149.898	LM27B_XVII_sp1
78	0	0	49.341	0.006	0.482	0.098	0.036	1.522	0.015	0	97.786	149.286	LM27B_XVII_sp2
79	0.012	0	50.296	0.138	0.455	0	0	1.418	0.088	0	98.225	150.632	LM27B_XVII_sp3
80	0.037	0	28.029	0	0.052	0	0	0	0.015	139.777	0	167.91	LM27B_XV_gn1
81	0.036	0	27.688	0.034	0.059	0	0	0.041	0.069	141.3	0.006	169.233	LM27B_XV_gn2
82	0.027	0.066	95.203	0	0.037	0.004	0.011	100.354	0	0	0	195.702	LM27B_XV_py1
83	0	0	0	0	0.02	0	0.01	0	0	0.016	0.004	0.05	LM27B_XV_sp1
84	0.001	0	57.407	100.231	0.033	0.03	0.064	67.618	0	0	0	225.384	LM27B_XV_cp1
85	0.156	0	28.344	0.119	0.052	0	0	0.014	0.294	143.573	0	172.552	LM27B_XIII_gn1
86	0	0	50.118	0.075	0.438	0.015	0	1.504	0	0.035	98.278	150.463	LM27B_XIII_sp1
87	0	0	50.393	1.034	0.458	0.011	0.017	1.235	0.017	0.012	97.227	150.404	LM27B_XIII_sp2
88	0.058	0.02	50.138	0.1	0.456	0.03	0.013	1.622	0	0.031	97.802	150.27	LM27B_XIII_sp3
89	0	0.317	36.823	45.225	0.103	0	0	0.001	43.885	61.461	0	187.815	LM27B_XIII_ttr1
90	0.037	0	28.482	0	0.054	0	0	0	0.114	142.72	0.395	171.802	LM27B_VII_gn1
91	0	0.069	58.043	99.134	0.042	0.004	0	67.694	0	0.082	2.319	227.387	LM27B_VII_cp1
92	0	0.007	51.051	0.451	0.482	0	0.009	1.358	0	0.109	97.536	151.003	LM27B_VII_sp1
93	0	0	50.705	2.206	0.458	0	0.022	1.68	0	0.078	96.025	151.174	LM27B_VII_sp2
94	0	0	50.629	1.512	0.443	0	0	1.419	0.139	0	96.518	150.66	LM27B_VII_sp3
95	0	4.36	40.855	120.788	0.12	0	0.448	4.333	50.642	0	9.624	231.17	LM27B_VII_ttr1
96	0.142	0	12.025	0	0.052	0	0	0.028	0	107.558	0	119.805	LM27B_V_gn1
97	0.134	0	28.935	0.073	0.046	0	0	0	0.036	143.934	0.014	173.172	LM33b_II_gn1
98	0.164	0	28.559	0	0.076	0	0	0	0.166	144.23	0.001	173.196	LM33b_II_gn2
99	0.065	0	28.169	0	0.057	0	0	0	0.055	143.499	0	171.845	LM33b_II_gn3
100	0	0	28.701	0	0.071	0	0	0.015	0.158	144.313	0	173.258	LM33b_II_gn4
101	0	0	58.689	101.807	0.043	0.072	0.007	70.357	0	0.082	0.007	231.064	LM33b_II_cpy1
102	0.004	0.046	59.002	101.273	0.049	0	0.053	70.148	0	0.058	0	230.633	LM33b_II_cpy2
103	0	0	60.065	102.347	0.045	0.038	0.001	71.02	0	0.062	0	233.578	LM33b_II_cpy3
104	0	0	98.713	0.809	0.049	0.045	0.042	99.766	0.029	0	0.162	199.615	LM33b_II_py1
105	0.19	0.02	96.991	0.708	0.047	0	0.162	99.849	0	0.109	0	198.076	LM33b_II_py2
106	0.048	0.013	97.469	1.041	0.031	0.049	0.041	99.391	0	0	0.025	198.108	LM33b_II_py3
107	0.019	0.055	99.139	0.712	0.025	0	0.008	99.598	0	0.176	0	199.732	LM33b_II_py4
108	0.065	0	28.636	0.003	0.053	0	0	0.12	0.048	142.603	0.034	171.562	LM33b_VII_gn1
109	0.077	0	28.729	0	0.021	0	0	0.062	0.105	145.367	0.255	174.616	LM33b_VII_gn2
110	0.123	0	28.646	0.022	0.029	0	0	0.076	0.172	145.113	1.221	175.402	LM33b_VII_gn3
111	0	0.084	98.382	0	0.059	0	0.008	99.765	0.006	0	0.18	198.484	LM33b_VII_py1
112	0.082	0.058	98.429	0	0.054	0	0.016	99.361	0.057	0.039	0.223	198.319	LM33b_VII_py2
113	0	0.062	99.017	0.069	0.037	0	0	100.142	0	0	0.059	199.386	LM33b_VII_py3
114	0	0.067	99.257	0.073	0.044	0.061	0.022	98.571	0	0.023	0.078	198.196	LM33b_VII_py4
115	0	0.051	99.556	0.003	0.049	0.042	0.01	99.794	0.006	0.125	0.222	199.858	LM33b_VII_py5
116	0.047	0.12	98.284	0.092	0.033	0	0.012	100.481	0.023	0.027	0	199.119	LM33b_VII_py6
117	0	0	98.761	0.079	0.063	0	0	99.487	0.048	0	0.054	198.492	LM33b_VII_py7
118	0.021	0.018	51.498	0.205	0.487	0.034	0.002	1.141	0	0.004	97.463	150.873	LM33b_VII_sp1
119	0.086	0.018	52.637	14.341	0.424	0	0	9.512	0	0.043	84.101	161.162	LM33b_VII_sp2
120	0	0	51.871	0.615	0.501	0.08	0	1.734	0	0.078	97.204	152.083	LM33b_VII_sp3
121	0.034	0	51.947	0.127	0.528	0	0	1.437	0	0.047	97.396	151.516	LM33b_VII_sp4
122	0.058	0	51.314	0.346	0.469	0	0.009	1.272	0	0.062	96.985	150.515	LM33b_VII_sp5
123	0	0	52.68	0	0.505	0	0.025	0.675	0.055	0	99.127	153.067	LM33b_VI_sp1
124	0	0	52.564	0	0.519	0	0.01	1.236	0.067	0.105	97.917	152.418	LM33b_VI_sp2
125	0	0	52.788	0.067	0.502	0.095	0.019	1.119	0	0.055	97.34	151.985	LM33b_VI_sp3
126	0.019	0	51.358	0.007	0.517	0	0	0.586	0	0	98.738	151.225	LM33b_VI_sp4
127	0.125	0	29.087	0	0.024	0	0	0	0.126	144.745	0.011	174.118	LM33b_VI_gn1
128	0.017	0.035	99.778	0.117	0.041	0	0	98.542	0.006	0	1.816	200.352	LM33b_VI_py1
129	0.093	0.029	59.445	100.53	0.067	0.034	0.022	68.437	0	0	0	228.657	LM33b_VIII_cpy1
130	0.008	0.004	59.045	100.061	0.06	0	0.018	68.298	0	0	0.051	227.545	LM33b_VIII_cpy2
131	0	0.042	98.973	0.088	0.033	0	0.035	98.944	0	0	0.001	198.116	LM33b_VIII_py1
132	0.067	0	51.579	0.066	0.475	0.004	0.025	0.594	0.09	0	98.087	150.987	LM33b_VIII_sp1
133	0	0.038	51.559	0	0.507	0	0	0.752	0.015	0	98.797	151.668	LM33b_VIII_sp2
134	0	0	52.089	0	0.459	0	0	0.621	0.063	0	97.779	151.011	LM33b_VIII_sp3
135	0	0.016	98.394	0.042	0.045	0	0	97.887	0	0	0.022	196.406	LM33b_IV_py1
136	0.019	0	98.386	0.106	0.03	0	0.011	97.445	0.042	0	0	196.039	LM33b_IV_py2
137	0.084	0.058	98.989	0.146	0.039	0	0.023	98.098	0	0.047	0.164	197.648	LM33b_IV_py3
138	0.057	2.839	96.741	0.278	0.04	0	0	97.458	0.019	0	0	197.432	LM33b_IV_py4
139	0	0.035	98.643	0.158	0.04	0	0	97.781	0	0.039	0.039	196.735	LM33b_IV_py5
140	0	0.067	98.444	0.214	0.044	0	0.032	99.544	0	0.07	0	198.415	LM33b_IV_py6
141	0	0.031	99.231	0.333	0.051	0.019	0.034	98.602	0.105	0.082	0.048	198.536	LM33b_IV_py7
142	0.002	0.102	98.342	0.026	0.049	0.011	0.017	98.157	0.05	0.074	0.026	196.856	LM33b_IV_py8
143	0.022	0	98.176	0.207	0.058	0	0	96.405	0	0.082	0.037	194.987	LM33b_IV_py9
144	0.035	0.024	99.761	0.116	0.052	0.008	0	97.383	0	0	0.104	197.483	LM33b_IV_py10
145	0.119	0	28.903	0	0.009	0	0	0.033	0	141.804	0.079	170.947	LM33b_IV_gn1
146	0	0	51.648	1.569	0.496	0.023	0	2.511	0.107	0.027	95.44	151.821	LM33b_IV_sp1
147	0	0	58.466	100.574	0.072	0	0	68.283	0	0.055	0	227.45	LM33b_IV_cpy1
148	0.083	0	58.01	101.654	0.056	0.061	0.032	69.074	0	0.215	0	229.185	LM33b_IV_cpy2
149	0.006	0	58.534	100.417	0.054	0	0.015	68.314	0	0	0.04	227.38	LM33b_IV_cpy3
150	0.037	0.046	100.348	0.246	0.039	0	0	97.038	0	0.039	0.023	197.816	LM33b_XI_py1
151	0	0.086	100.172	0.303	0.045	0	0.012	98.039	0.021	0.035	0.057	198.77	LM33b_XI_py2
152	0.008	0.088	99.708	0.215	0.034	0	0.01	98.289	0.034	0.031	0.018	198.435	LM33b_XI_py3
153	0.071	0.007	98.956	0.179	0.025	0	0	98.724	0	0	0.023	197.985	LM33b_XI_py4
154	0.11	0.042	98.85	0.391	0.06	0.095	0	98.436	0.019	0.082	0	198.085	LM33b_XI_py5
155	0.042	0.029	99.264	0.339	0.055	0.004	0.03	97.819	0	0	0.044	197.626	LM33b_XI_py6
156	0.036	0.051	99.966	0.059	0.037	0.042	0	97.623	0.065	0.055	0.01	197.944	LM33b_XI_py7
157	0.018	0.011	99.672	0.064	0.065	0	0.035	97.48	0.004	0	0.014	197.363	LM33b_XI_py8
158	0	0.029	58.479	100.785	0.075	0	0.045	69.067	0	0.086	0	228.566	LM33b_XI_cpy1
159	0	0.049	58.586	101.765	0.06	0	0.003	68.631	0	0	0	229.094	LM33b_XI_cpy2
160	0.074	0	58.443	101.923	0.057	0	0.035	69.23	0	0	0.031	229.793	LM33b_XI_cpy3
161	0	0	59.243	100.995	0.054	0	0.026	69.547	0	0	0.038	229.903	LM33b_XI_cpy4
162	0	0	99.234	0.082	0.04	0.004	0.019	97.883	0	0	0.181	197.443	LM33b_III_py1
163	0.039	0	99.798	0.078	0.07	0	0	98.046	0	0.039	0	198.07	LM33b_III_py2
164	0.071	0.086	99.233	0.18	0.054	0.019	0	98.857	0	0	0.046	198.546	LM33b_III_py3
165	0.005	0	99.07	0.116	0.034	0.027	0	98.677	0.032	0	0	197.961	LM33b_III_py4
166	0	0.005	99.41	0.073	0.053	0	0.021	98.165	0.021	0	0.003	197.751	LM33b_III_py5
167	0	0.015	99.576	0.179	0.044	0.008	0.007	98.584	0	0	0	198.413	LM33b_III_py6
168	0.023	0.066	100.165	0.107	0.035	0	0.011	99.48	0	0	0.004	199.891	LM33b_III_py7
169	0	0.064	100.286	0.21	0.051	0	0	98.873	0	0.02	0.278	199.782	LM33b_III_py8
170	0.062	0	99.517	0.089	0.052	0	0	99.864	0	0.031	0	199.615	LM33b_III_py9
171	0	0	0.311	0.358	0.013	0.004	0	0.639	0	0.031	0.034	1.39	LM33b_III_Sbox1
172	0.084	0	59.355	101.009	0.038	0.038	0	69.517	0	0.031	0	230.072	LM33b_III_cpy1
173	0.091	0	59.133	101.1	0.023	0.011	0.016	70.017	0	0	0	230.391	LM33b_III_cpy2
174	0	0	59.439	101.408	0.047	0.038	0	69.966	0	0	0.004	230.902	LM33b_III_cpy3
175	0.019	0.015	59.393	100.013	0.035	0.015	0.022	68.953	0	0	0.053	228.518	LM33b_III_cpy4
176	0	0	29.051	0.12	0.035	0	0	0.103	0.051	143.885	0	173.245	LM33b_III_gn1
177	0	0	28.646	0.047	0.015	0	0	0	0	143.884	0	172.592	LM33b_III_gn2
178	0.066	0.077	99.257	0.148	0.06	0	0	99.166	0.069	0.062	0.021	198.926	LM33b_III_py1
179	0.083	0.044	99.934	0	0.054	0.03	0	99.399	0.038	0	0	199.582	LM33b_III_py2
180	0.01	0.069	100.084	0.056	0.027	0.019	0.002	99.144	0	0	0	199.411	LM33b_III_py3
181	0	0.062	100.115	0.047	0.063	0.011	0	97.119	0.038	0	0	197.455	LM33b_III_py4
182	0.042	0.046	98.915	0	0.035	0.064	0	98.8	0	0	0	197.902	LM33b_III_py5
183	0.062	0.06	99.068	0.125	0.036	0.004	0	99.141	0	0.051	0.025	198.572	LM33b_III_py6
184	0.049	0.046	98.507	0.01	0.051	0.023	0	100.332	0.063	0.016	0	199.097	LM33b_III_py7
185	0	0.102	99.061	0.107	0.039	0	0.028	98.838	0	0.059	0.056	198.29	LM33b_III_py8
186	0	0.062	98.888	0.142	0.042	0	0.004	99.971	0.076	0	0	199.185	LM64_I_py1
187	0	0.036	99.345	0	0.004	0.023	0.002	100.026	0.069	0	0	199.505	LM64_I_py2
188	0.011	0.088	98.869	0.012	0.056	0.004	0.001	99.374	0.002	0	0	198.417	LM64_I_py3
189	0.022	0.051	99.19	0.022	0.044	0	0.032	98.508	0	0	0.004	197.873	LM64_I_py4
190	0	0.036	99.583	0.032	0.058	0	0	99.365	0	0	0.019	199.093	LM64_I_py5
191	0.09	0	99.986	0.004	0.045	0	0.001	99.984	0.004	0	0	200.114	LM64_I_py6
192	0	0	99.523	0	0.054	0	0	98.668	0	0.031	0.01	198.286	LM64_I_py7
193	0.059	0.086	98.853	0.013	0.049	0	0.019	98.628	0	0	0.019	197.726	LM64_I_py8
194	0	0.088	98.254	0	0.034	0.023	0.01	99.219	0	0	0	197.628	LM64_I_py9
195	0	0.082	99.234	0.003	0.046	0.038	0.011	96.885	0	0	0	196.299	LM64_I_py10
196	0.05	0.016	99.388	0.015	0.043	0	0.021	99.806	0	0	0	199.339	LM64_II_py1
197	0.002	0	99.403	0.004	0.053	0.068	0.011	99.004	0	0.039	0	198.584	LM64_II_py2.1
198	0	0.044	98.876	0.066	0.042	0.015	0.012	99.055	0.021	0.023	0.051	198.205	LM64_II_py2.2
199	0.016	0.018	98.356	0	0.057	0	0.031	98.832	0.065	0	0	197.375	LM64_II_py2.3
200	0.054	0.029	98.315	0.132	0.03	0	0	98.006	0	0	0.011	196.577	LM64_II_py3
201	0.075	0	92.815	0.087	0.054	0.008	0.007	100.825	0	0	0	193.871	LM64_II_py4
202	0	0.046	100.117	0.117	0.057	0.046	0	98.79	0	0.051	0	199.224	LM64_II_py5
203	0	2.208	98.32	0.05	0.055	0.042	0.013	98.69	0.034	0	0.053	199.465	LM64_II_py6
204	0.05	0.002	98.895	0.021	0.042	0.015	0	99.429	0	0.027	0.031	198.512	LM64_II_py7
205	0	0.046	99.174	0	0.064	0.038	0.015	98.982	0	0.066	0.022	198.407	LM64_XII_py1
206	0	0.097	95.964	0.056	0.056	0.027	0	97.813	0	0.066	0.003	194.082	LM64_XII_py2
207	0.038	0	99.389	0.07	0.043	0.038	0	98.522	0.015	0	0.029	198.144	LM64_XII_py3
208	0	0.108	99.927	0	0.058	0.046	0.017	99.507	0.027	0	0	199.69	LM64_XII_py4
209	0.015	0	81.282	0.059	0.045	0	0	67.208	0	0	0.013	148.622	LM64_XII_unknown1
210	0.015	0.068	100.03	0.089	0.049	0	0	98.777	0.074	0	0	199.102	LM64_XIV_py1
211	0	0.078	99.605	0.045	0.033	0	0	98.961	0.002	0.012	0	198.736	LM64_XIV_py2
212	0	0.042	100.18	0.098	0.021	0.083	0.022	99.87	0	0	0	200.316	LM64_XIV_py3
213	0.002	0.004	99.495	0.029	0.038	0	0	99.515	0.023	0	0	199.106	LM64_XIV_py4
214	0.028	0	100.005	0.069	0.043	0	0.002	99.143	0	0.023	0	199.313	LM64_XIV_py5
215	0.028	0.057	0.592	0.051	0.04	0.015	0	1.275	0	0	0	2.058	LM64_XIV_unknown1
216	0	0	34.912	0.004	0.03	0	0.007	10.255	0	0.02	0.013	45.241	LM64_XIV_unknown2
217	0.087	0.051	99.372	0.089	0.048	0.008	0.009	98.25	0	0	0.009	197.923	LM64_XIV_py6
218	0	0.016	99.42	0.067	0.044	0.023	0.032	99.063	0.074	0	0	198.739	LM64_XIV_py7
219	0	0.108	99.393	0	0.032	0.008	0	99.858	0.072	0	0.014	199.485	LM64_III_py1
220	0.02	0.075	100.153	0	0.031	0	0.022	97.231	0.16	0	0	197.692	LM64_III_py2
221	0	0.005	99.975	0.06	0.037	0	0	99.071	0.008	0	0	199.156	LM64_III_py3
222	0	0.026	97.954	0.076	0.026	0	0	98.571	0	0.062	0.025	196.74	LM64_III_py4
223	0.024	0.111	98.111	0.072	0.024	0.008	0	99.371	0.067	0.004	0.011	197.803	LM64_III_py5
224	0.046	0	84.163	0.092	0.027	0.281	0.02	0.994	0.116	0	0.007	85.746	LM64_III_Mo1
225	0	0	51.963	0.226	0.497	0	0.032	1.048	0	0	97.459	151.225	LM64_III_sp1
226	0	0.02	51.947	0.194	0.534	0	0	1.255	0	0	98.153	152.103	LM64_III_sp2
227	0.003	0	51.753	0.05	0.503	0	0.02	1.412	0.034	0	97.889	151.664	LM64_III_sp3
228	0.002	0.024	98.895	0.113	0.057	0	0.022	98.095	0.04	0	0	197.248	LM64_XIII_py1
229	0	0.088	99.481	0	0.046	0	0	97.426	0.112	0	0.018	197.171	LM64_XIII_py2
230	0.035	0.126	99.085	0.034	0.022	0.049	0.02	97.824	0	0	0	197.195	LM64_IV_py1
231	0	0.02	99.725	0.087	0.039	0	0.018	98.329	0.029	0	0	198.247	LM64_IV_py2
232	0.016	0.057	99.62	0.1	0.039	0.03	0.002	97.371	0	0.012	0.016	197.263	LM64_IV_py3
233	0.008	0.069	98.852	0.13	0.058	0	0	98.026	0	0.059	0	197.202	LM64_IV_py4
234	0.006	0.206	97.902	0.035	0.04	0	0	97.114	0	0	0	195.303	LM64_IV_py5
235	0	0.036	97.8	0	0.058	0	0	98.474	0	0.055	0	196.423	LM64_VI_py1
236	0.01	0.024	98.549	0.072	0.034	0	0.009	100.33	0.025	0	0.004	199.057	LM64_VI_py2
237	0	0.055	98.389	0.031	0.024	0.008	0	99.549	0.034	0.016	0	198.106	LM64_VI_py3
238	0.068	0.089	98.774	0.034	0.058	0.106	0.021	99.154	0.044	0.039	0.009	198.396	LM64_VI_py4
239	0	0.046	98.166	0.015	0.028	0	0	98.279	0	0	0.044	196.578	LM64_VI_py5
240	0.084	0.007	97.578	0.031	0.038	0	0.016	98.081	0	0	0	195.835	LM64_VI_py6
241	0.045	0.097	98.172	0.029	0.05	0	0.031	97.313	0	0.086	0	195.823	LM64_VI_py7
242	0	0.016	98.242	0.012	0.038	0	0.027	98.896	0.002	0.035	0	197.268	LM64_VI_py8
243	0	0.089	98.737	0.004	0.055	0.023	0	98.071	0.021	0.051	0.025	197.076	LM64_VI_py9
244	0.076	0	98.405	0.021	0.046	0	0	97.684	0	0	0.007	196.239	LM64_VIII_py1
245	0	0.294	98.624	0.097	0.063	0.03	0	96.877	0.196	0	0	196.181	LM64_VIII_py2
246	0.077	0.126	97.51	0.114	0.057	0.027	0	98.311	0.034	0	0	196.256	LM64_VIII_py3
247	0.013	0.018	98.595	0.009	0.019	0.034	0	98.019	0.034	0.094	0.023	196.858	LM64_VIII_py4
248	0	0	98.511	0.06	0.034	0.03	0	99.206	0	0	0	197.841	LM64_VIII_py5
249	0	0.016	98.995	0.084	0.045	0	0	98.05	0.048	0	0	197.238	LM64_VIII_py6
250	0.035	0.018	99.509	0.07	0.023	0	0	97.388	0.145	0.027	0.037	197.252	LM64_VIII_py7
251	0.006	0	50.006	0.417	0.483	0	0.011	2.404	0.158	0	102.362	155.847	LM33a_I_sp1
252	0.036	0	51.041	0.223	0.475	0.004	0.007	1.81	0.034	0	96.369	149.999	LM33a_I_sp2
253	0.04	0	50.827	0.166	0.438	0.011	0	1.938	0	0.043	97.972	151.435	LM33a_I_sp3
254	0	0	51.019	0.585	0.471	0.004	0.043	2.007	0.145	0.133	97.751	152.158	LM33a_I_sp4
255	0	0.051	99.284	0.126	0.021	0.023	0	97.372	0	0	0.132	197.009	LM33a_I_py1
256	0.049	0.12	98.681	0.151	0.033	0	0	97.401	0	0.035	0.019	196.489	LM33a_I_py2
257	0	0.111	99.423	0.048	0.018	0.004	0	97.582	0.046	0.086	0.004	197.322	LM33a_I_py3
258	0.072	0.004	98.269	0.044	0.045	0.046	0	98.088	0	0.035	0	196.603	LM33a_II_py1
259	0.109	0	28.324	0	0.037	0	0	0.014	0	144.446	0.065	172.995	LM33a_II_gn1
260	0.013	0	28.517	0.072	0.053	0	0	0.057	0.011	144.493	0.037	173.253	LM33a_II_gn2
261	0	0.049	51.072	0.352	0.51	0.011	0	1.632	0	0	97.896	151.522	LM33a_II_sp1
262	0	0.02	51.061	0.082	0.467	0.008	0	1.535	0	0	97.498	150.671	LM33a_II_sp2
263	0.047	0	50.356	0.139	0.468	0	0.006	0.871	0.082	0.109	97.854	149.932	LM33a_II_sp3
264	0	0.058	97.962	0.106	0.029	0	0	98.157	0	0.043	0.132	196.487	LM33a_XII_py1
265	0.004	0.073	97.208	0.013	0.062	0.027	0	98.923	0	0	0.074	196.384	LM33a_XII_py2
266	0	0.058	98.581	0.023	0.058	0	0.024	98.877	0	0	0.171	197.792	LM33a_XII_py3
267	0.067	0.035	98.814	0.041	0.038	0	0.016	98.711	0.006	0.012	0.01	197.75	LM33a_XII_py4
268	0	0	50.499	0.019	0.537	0.042	0	1.066	0.095	0	97.985	150.243	LM33a_XII_sp1
269	0	0	51.781	0.043	0.504	0.004	0.032	0.494	0	0	98.685	151.543	LM33a_XII_sp2
270	0	0	49.978	0.021	0.573	0.008	0	0.605	0.097	0.043	98.993	150.318	LM33a_XII_sp3
271	0.013	0.151	97.816	0.012	0.058	0.023	0.002	99.186	0	0	0.314	197.575	LM33a_VIII_py1
272	0	9.739	41.251	113.337	0.231	0	4.91	2.79	38.714	0	11.839	222.811	LM33a_VIII_ttr1
273	0	9.336	41.514	115.823	0.242	0	4.491	2.023	39.383	0.012	12.306	225.13	LM33a_VIII_ttr2
274	0	0	52.512	0.073	0.484	0.027	0.022	0.542	0	0	98.993	152.653	LM33a_VIII_sp1
275	0	0	52.406	0	0.503	0	0.006	0.726	0	0	98.543	152.184	LM33a_VIII_sp2
276	0.038	0	52.031	0	0.534	0	0	1.189	0.154	0	97.934	151.88	LM33a_VIII_sp3
277	0	0.104	97.887	0.028	0.029	0	0.018	98.874	0.143	0.055	0.785	197.923	LM33a_VIII_py2
278	0.102	0	28.899	0	0.033	0	0	0	0.093	142.177	0.018	171.322	LM33a_XV_gn1
279	0.061	0	29.007	0	0.031	0	0.002	0.01	0.204	143.197	0.02	172.532	LM33a_XV_gn2
280	0.024	0	57.727	99.784	0.04	0	0	68.475	0	0.008	0.016	226.074	LM33a_XV_py1
281	0.098	0	28.452	0.079	0.027	0	0	0	0.16	145.126	0	173.942	LM33a_IX_gn1
282	0	0.011	57.939	101.429	0.039	0.023	0.012	69.661	0	0	0	229.114	LM33a_IX_py1
283	0.011	0.02	57.932	99.685	0.062	0.03	0.029	67.374	0	0	0	225.143	LM33a_III_cpy1
284	0.068	0	59.086	99.772	0.046	0.08	0.019	68.447	0	0.066	0	227.584	LM33a_III_cpy2
285	0	0	58.51	100.511	0.05	0	0.03	68.75	0	0	0.029	227.88	LM33a_III_cpy3
286	0.1	0	28.389	0.2	0.08	0	0	0	0.017	145.089	0	173.875	LM33a_III_gn1
287	0.126	0	28.599	0.511	0.05	0	0	0.167	0	146.16	0	175.613	LM33a_III_gn2
288	0.093	0	28.523	0.054	0.057	0	0	0.004	0.076	143.424	0.042	172.273	LM33a_III_gn3
289	0.017	0.073	99.218	0.525	0.045	0.03	0.011	98.491	0.023	0	0.051	198.484	LM33a_III_py1
290	0.051	0.009	98.677	0.71	0.042	0.053	0.013	98.975	0.069	0.02	0.043	198.662	LM33a_III_py2
291	0.004	0.088	99.71	0.964	0.073	0	0	95.799	0	0.102	0.001	196.741	LM33a_III_py3
292	0.041	0.022	98.776	0.296	0.053	0.038	0	98.538	0	0.031	0	197.795	LM33a_IV_py1
293	0.004	0	57.761	101.186	0.038	0	0.035	69.139	0	0	0.025	228.188	LM33a_IV_cpy1
294	0	0	27.973	3.844	0.016	0	0	1.385	0	143.184	0	176.402	LM33a_IV_gn1
295	0.038	0	28.611	0.316	0.041	0	0	0.05	0.202	147.099	0.015	176.372	LM33a_XIII_gn1
296	0	0.009	58.819	100.09	0.039	0	0	68.736	0	0	0.025	227.718	LM33a_XIII_cpy1
297	0.017	0.071	98.823	0.236	0.035	0.011	0.001	99.153	0.067	0	0.001	198.415	LM33a_XIII_py1
298	0	0.04	99.991	0.808	0.043	0	0	97.028	0.051	0	0.018	197.979	LM33a_XIII_py2
299	0.111	0	28.661	0.12	0.055	0	0	0	0	145.881	0	174.828	LM33a_V_gn1
300	0	13.243	40.87	81.498	0.505	0	24.065	2.152	29.43	0.121	9.449	201.333	LM33a_V_ttr1
301	0	0	58.819	99.756	0.057	0.019	0.008	68.57	0	0	0.023	227.252	LM33a_V_cpy1
302	0	0	51.817	0.586	0.524	0	0	1.062	0	0	96.199	150.188	LM33a_V_sp1
303	0	0.069	99.287	0.117	0.05	0.004	0	97.182	0	0.059	0.001	196.769	LM33a_V_py1
304	0.06	0	28.651	0.079	0.032	0	0	0	0.12	145.069	0.046	174.057	LM33a_X_gn1
305	0.047	0	58.864	100.357	0.042	0	0.013	68.533	0	0.035	0.16	228.051	LM33a_X_cpy1
306	0	0	51.491	0.131	0.512	0.053	0	0.653	0.048	0	98.005	150.893	LM33a_X_sp1
307	0.037	0	99.183	0.072	0.043	0.011	0	97.297	0.006	0.094	0	196.743	LM33a_X_py1
308	0	0.016	100.162	0.116	0.075	0	0.009	97.575	0	0	0.006	197.959	LM33a_XII_py1
309	0	0.042	100.356	0.089	0.057	0.038	0	97.583	0.027	0.055	0.052	198.299	LM33a_XII_py2
310	0	0.044	99.51	0.031	0.028	0	0.064	98.067	0.015	0	0.029	197.788	LM33a_XII_py3
311	0.103	0	28.527	0.01	0.079	0	0	0.013	0.048	146.375	0.034	175.189	LM33a_XII_gn1
312	0.025	0.026	59.051	99.935	0.031	0	0.007	68.67	0	0.059	0.097	227.901	LM33a_XII_cp1
313	100.542	0	0.014	0.057	0.815	0	100.613	0	0	0.039	0	202.08	std_Ag2Te_1
314	100.738	0	0.04	0.035	0.835	0	99.734	0.045	0	0	0.029	201.456	std_Ag2Te_2
315	0	100.766	0.004	0	0.178	0.004	0	0	0	0	0.01	100.962	std_InAs_1
316	0	101.38	0	0	0.224	0	0	0	0	0.016	0	101.62	std_InAs_2
317	0	0	98.448	0.095	0.051	0.004	0.009	96.273	0.027	0.141	0.008	195.056	std_FeS2_1
318	0.046	0.018	98.444	0.019	0.025	0.057	0	96.442	0	0.012	0.041	195.104	std_FeS2_2
319	0	0.053	99.191	0.021	0.06	0.046	0.025	96.661	0	0.094	0.036	196.187	std_FeS2_3
320	0.02	0	59.163	99.066	0.05	0.091	0.02	68.271	0	0.016	0	226.697	std_cpy_1
321	0	0	58.961	99.326	0.045	0	0	68.626	0	0.023	0	226.981	std_cpy_2
322	0	0.009	58.639	98.879	0.046	0	0	68.384	0	0.113	0.009	226.079	std_cpy_3
323	0	0	42.918	0.056	99.649	0	0.024	0	0.051	0	0.012	142.71	std_CdS_1
324	0	0.079	42.997	0.141	99.724	0.008	0	0	0.143	0	0.034	143.126	std_CdS_2
325	0.036	0	0	1.016	0.078	101.213	0.011	0	0	0	0	102.354	std_Au_1
326	0	0.02	0	0.814	0.079	99.995	0.059	0	0	0	0	100.967	std_Au_2
327	0	2.002	0	0.006	0.181	0	0	0.026	100.177	0	0.015	102.407	std_InSb_1
328	0	1.815	0.015	0.161	0.203	0.068	0	0.03	101.381	0	0	103.673	std_InSb_2
329	107.103	0	0	0.072	0.048	0	0	0.036	0	97.657	0.01	204.926	std_PbTe_1
330	107.375	0	0	0	0.029	0	0	0	0	96.972	0	204.376	std_PbTe_2
331	107.449	0	0	0.114	0.01	0	0	0	0	98.393	0.04	206.006	std_PbTe_3
332	0	0	51.634	0.097	0.033	0	0	0.008	0.088	0	99.723	151.583	std_sph_1
333	0.027	0	51.32	0.117	0.019	0	0	0.003	0	0.039	99.772	151.297	std_sph_2
334	0.071	0	51.522	0.1	0.041	0	0.008	0.013	0	0	99.922	151.677	std_sph_3
99999	107.558	0	0.005	0.053	0.069	0	0	0.019	0	97.439	0.028	205.171
Minimum	0	0	0	0	0.004	0	0	0	0	0	0	0.05
Maximum	108.487	102.355	100.356	122.38	99.724	101.213	100.613	101.654	102.543	147.099	102.362	233.578
Average	3.791	1.773	64.304	14.963	1.612	1.512	1.611	50.47	3.294	20.306	18.132	181.767
Sigma	19.511	12.345	33.777	35.98	11.988	12.193	12.231	46.656	14.949	47.84	37.616	36.864
No. of data 335

## Sheet: 2020-05-27_Fakos_kraw
K-raw (intensity ratio)	Group : Haase	Sample : 20200527_MK	Page	1
No.	Te	As	S	Cu	Cd	Au	Ag	Fe	Sb	Pb	Zn	Total	Comment
1	100.692	0	0.039	0.034	0.729	0	100.211	0	0	0	0.049	201.754	std_Ag2Te_1
2	101.748	0	0.065	0.073	0.781	0.087	100.549	0	0	0	0	203.303	std_Ag2Te_2
3	101.004	0	0.03	0.054	0.749	0	100.5	0	0	0	0	202.337	std_Ag2Te_3
4	0	102.172	0.032	0	0.16	0.011	0	0	0	0	0	102.375	std_InAs_1
5	0	102.939	0	0	0.145	0	0	0.021	0	0.008	0.046	103.159	std_InAs_2
6	0	102.508	0	0	0.192	0	0	0.006	0	0.016	0.109	102.831	std_InAs_3
7	0.052	0	99.642	0.013	0.035	0	0	99.426	0	0	0	199.168	std_FeS2_1
8	0	0.035	99.326	0	0.038	0.091	0.009	100.201	0.025	0	0.034	199.759	std_FeS2_2
9	0	0.066	99.359	0	0.036	0.038	0	100.488	0	0	0	199.987	std_FeS2_3
10	0	0	57.851	101.353	0.045	0.019	0.011	70.142	0	0	0	229.421	std_cpy_1
11	0.003	0	58.563	100.918	0.042	0	0.03	69.693	0	0	0.004	229.253	std_cpy_2
12	0.078	0	58.683	101.55	0.07	0.011	0	70.348	0	0.012	0	230.752	std_cpy_3
13	0	0.027	42.589	0.188	98.291	0.015	0	0.016	0	0	0.011	141.137	std_CdS_1
14	0	0	42.411	0.095	98.327	0	0.074	0	0	0	0.07	140.977	std_CdS_2
15	0	0	42.545	0.123	98.763	0.004	0.024	0	0	0	0.025	141.484	std_CdS_3
16	0.028	0	0	0.866	0.078	100.821	0.052	0	0	0	0	101.845	std_Au_1
17	0	0	0	0.843	0.064	100.322	0.02	0.003	0	0	0	101.252	std_Au_2
18	0	0	0	0.769	0.101	101.179	0	0.067	0	0	0	102.116	std_Au_3
19	0	1.67	0	0.117	0.141	0	0	0.016	102.56	0	0.019	104.523	std_InSb_1
20	0	1.465	0.005	0.153	0.164	0	0	0.106	102.205	0	0.01	104.108	std_InSb_2
21	0	1.76	0.008	0	0.159	0	0	0	101.816	0.016	0.016	103.775	std_InSb_3
22	108.118	0	0	0.056	0.045	0	0	0	0	94.776	0.008	203.003	std_PbTe_1
23	109.175	0	0.002	0	0.093	0	0	0	0	94.829	0.065	204.164	std_PbTe_2
24	108.704	0	0.014	0.035	0.035	0	0	0.004	0	94.048	0.025	202.865	std_PbTe_3
25	0.018	0.022	50.564	0.101	0.052	0	0	0	0.099	0	100.673	151.529	std_sph_1
26	0	0	50.912	0.043	0.045	0.053	0	0	0.074	0	100.994	152.121	std_sph_2
27	0.043	0	51.409	0.029	0.025	0	0	0	0.065	0	100.315	151.886	std_sph_3
28	0	0.78	37.88	45.67	0.035	0	0	0	42.428	62.982	0	189.775	LM27B_XII_ttr_1
29	0	0.407	37.23	45.813	0.076	0	0	0.068	43.057	61.821	0.059	188.531	LM27B_XII_ttr_2
30	0	0	19.297	44.947	0.109	0	0.016	0.762	26.308	57.175	0.285	148.899	LM27B_XII_ttr_3
31	0	0.509	37.031	46.34	0.08	0	0.009	0.01	43.137	62.297	0	189.413	LM27B_XII_ttr_4
32	0.088	0	28.253	0.28	0.055	0	0	0	0.038	143.014	0	171.728	LM27B_XVI_gn_1
33	0.044	0	28.415	0.125	0.059	0	0	0	0.084	141.172	0.04	169.939	LM27B_XVI_gn_2
34	0.114	0	28.346	0.037	0.08	0.004	0	0.015	0.015	141.966	0.049	170.626	LM27B_XVI_gn_3
35	0	0.066	51.968	190.706	0.062	0	0.112	0	0	2.551	0.065	245.53	LM27B_XVI_CuS_1
36	0	0.026	50.605	6.435	0.458	0	0.013	4.578	0.027	0.047	89.842	152.031	LM27B_XVI_sp1
37	0	0	51.843	190.658	0.074	0.011	0.119	0	0	2.519	0.072	245.296	LM27B_XVI_CuS_3
38	0.093	0	15.83	0.394	0.041	0	0	0.029	0	105.765	1.211	123.363	LM27B_XVI_plat_1
39	0.115	0	15.126	0	0.052	0	0	0	0.107	106.385	0	121.785	LM27B_VI_gn1
40	0	0.079	58.806	100.614	0.057	0.015	0	70.035	0	0.095	0.403	230.104	LM27B_VI_cpy1
41	0	0.055	58.573	101.799	0.055	0.019	0	70.34	0	0	0.188	231.029	LM27B_VI_cpy2
42	0	0	52.107	12.33	0.493	0	0	8.222	0	0.131	88.883	162.166	LM27B_VI_sp1
43	0.053	0.042	51.91	1.389	0.481	0.038	0.015	1.373	0	0	97.284	152.585	LM27B_VI_sp2
44	0.006	0.02	50.931	2.397	0.442	0	0	1.961	0	0	94.5	150.257	LM27B_VI_sp3
45	0	0.013	49.904	3.064	0.459	0	0.004	2.63	0	0	96.713	152.787	LM27B_VI_sp4
46	0.023	0	58.816	100.752	0.058	0.023	0.029	68.789	0	0.162	0.248	228.9	LM27B_VI_cpy3
47	0	0	51.439	2.196	0.445	0	0	1.764	0	0	96.769	152.613	LM27B_VI_sp_5
48	0.055	0	50.679	5.655	0.466	0	0	4.26	0	0	93.954	155.069	LM27B_VI_sp_7
49	0.028	0	15.212	0	0.012	0	0	0.046	0.025	103.861	0.055	119.239	LM27B_VI_gn_2
50	0.087	0	14.674	0.037	0.074	0	0	0.322	0.027	106.285	0.17	121.676	LM27B_VI_gn_3
51	0.12	0.073	51.499	0.977	0.515	0.046	0.019	0.967	0	0	98.624	152.84	LM27B_VI_sp_8
52	0.085	0	58.72	101.833	0.045	0	0.022	69.977	0	0.04	0.028	230.75	LM27B_VI_cpy_4
53	0	0.035	99.53	0.179	0.035	0.038	0.027	100.414	0.021	0	0.251	200.53	LM27B_VI_py_1
54	0	0.002	99.542	0.076	0.053	0	0.021	100.861	0.059	0	0.087	200.701	LM27B_VI_py_2
55	0.05	0	98.618	0.018	0.026	0.03	0	100.629	0	0	0.065	199.436	LM27B_VI_py_3
56	0.008	0.037	98.555	0.144	0.04	0.019	0.018	100.937	0.103	0	0.018	199.879	LM27B_VI_py_4
57	0.027	0.038	99.2	0.145	0.072	0.019	0.056	101.01	0.011	0	0	200.578	LM27B_VI_py_5
58	0	0.049	100.638	0.041	0.029	0.015	0	100.009	0.006	0	0.242	201.029	LM27B_VI_py_6
59	0.079	0.015	99.487	0.043	0.032	0	0	100.641	0	0	0.028	200.325	LM33b_X_py1
60	0	0.011	97.596	0.129	0.064	0.046	0.009	101.006	0.137	0	0.015	199.013	LM33b_X_py2
61	0	0.002	99.791	0.834	0.034	0.023	0.029	100.872	0.076	0	0	201.661	LM33b_X_py3
62	0.005	0.044	99.74	0.851	0.034	0.034	0	101.155	0.141	0	0	202.004	LM33b_X_py4
63	0	0.053	99.954	0.148	0.057	0	0	100.894	0	0.02	0.052	201.178	LM33b_X_py5
64	0	0.027	58.358	102.079	0.046	0	0.03	70.223	0	0	0	230.763	LM33b_X_cpy_1
65	0.082	0	57.929	102.176	0.046	0.038	0.002	69.954	0	0.131	0	230.358	LM33b_X_cpy_2
66	0	3.937	55.137	104.247	0.061	0	0.84	61.074	0.499	0.02	1.373	227.188	LM33b_X_cpy_3
67	0	36.352	42.49	125.449	0.209	0.03	4.303	10.448	2.171	0	9.18	230.632	LM33b_X_unknown_1
68	0	37.892	42.632	125.127	0.234	0.004	4.88	8.841	3.134	0.154	9.321	232.219	LM33b_X_unknown_2
69	0.03	0	29.115	3.541	0.027	0	0	5.404	0	138.087	0.04	176.244	LM33b_X_gn_1
70	0.007	0	29.464	3.13	0.02	0	0	5.122	0	138.52	0	176.263	LM33b_X_gn_2
71	0	28.968	41.771	128.501	0.159	0.046	1.678	4.129	13.119	0	10.554	228.925	LM33b_X_unknown_3
72	0	0.886	98.38	0	0.043	0.008	0	100.842	0.053	0.004	0.068	200.284	LM33b_V_py_1
73	0	1.141	98.373	0.051	0.057	0	0	100.762	0.057	0	0	200.441	LM33b_V_py_2
74	0	1.398	98.607	0.128	0.033	0.008	0	100.974	0.135	0	0.021	201.304	LM33b_V_py_3
75	0.003	0	2.206	0.185	0.038	0	0	2.483	0	92.61	0.082	97.607	LM33b_V_unknowm_1
76	0	0	2.771	0.007	0.066	0	0	3.502	3.11	94.641	0.003	104.1	LM33b_V_unknowm_2
77	0.148	0	2.488	0.01	0	0	0	5.06	0	90.605	0.038	98.349	LM33b_V_unknowm_3
78	0	3.625	95.489	0.09	0.021	0.084	0	100.633	0.032	0.202	0.059	200.235	LM33b_V_py_4
79	0.002	0.345	99.16	0	0.053	0.065	0	100.34	0	0	0.055	200.02	LM33b_V_py_5
80	0.005	0.015	50.188	0.06	0.098	0	0.003	2.971	0	0	97.936	151.276	LM33b_V_sp_1
81	0	0	49.593	0.044	0.067	0.019	0.009	2.129	0	0	99.043	150.904	LM33b_V_sp_2
82	0	0.166	100.243	0.028	0.053	0.019	0	100.955	0.03	0.083	0	201.577	LM64_V_py_1
83	0.054	0	100.047	0	0.03	0	0.027	100.42	0	0	0.053	200.631	LM64_V_py_2
84	0	0	31.886	0.018	0.016	0.042	0	2.254	0	0.02	0	34.236	LM64_V_unknown_1
85	0.01	0	71.507	0.006	0.039	0.015	0	69.229	0	0	0	140.806	LM64_V_unknown_2
86	0	0	100.196	0.019	0.064	0.103	0.002	101.335	0	0	0	201.719	LM64_V_py_3
87	0	0.022	98.426	0.01	0.043	0	0	100.326	0	0	0	198.827	LM64_V_py_4
88	0	0.013	99.171	0.046	0.064	0	0.056	100.266	0	0	0.021	199.637	LM64_V_py_5
89	0	0.164	98.417	0	0.023	0.057	0	100.912	0.025	0	0.031	199.629	LM64_V_py_6
90	0.032	0.1	97.963	0	0.054	0.019	0	100.561	0.072	0	0	198.801	LM64_V_py_7
91	0	0	99.12	0	0.055	0	0	101.069	0.061	0	0.016	200.321	LM64_V_py_8
92	0.035	0.011	98.595	0	0.051	0.03	0	100.432	0	0	0.022	199.176	LM64_V_py_9
93	0	0	30.404	0	0.024	0	0.01	1.319	0	0	0.03	31.787	LM64_V_unknown_3
94	0	0	0	0.01	0.043	0	0	0.549	0	0.004	0.017	0.623	LM64_V_sp_1
95	0.072	0.024	97.691	0.048	0.021	0	0.001	100.586	0.105	0	0.034	198.582	LM64_VII_py1
96	0.015	0.073	97.857	0.003	0.024	0	0.001	100.896	0.053	0	0.022	198.944	LM64_VII_py2
97	0.006	0.04	98.245	0.041	0.044	0.023	0.022	100.873	0.013	0	0.03	199.337	LM64_VII_py3
98	0.029	0.106	97.393	0.082	0.031	0	0	100.28	0.034	0	0.019	197.974	LM64_VII_py4
99	0	0.077	97.369	0.073	0.04	0	0	101.002	0	0	0.026	198.587	LM64_VII_py5
100	0	0.101	97.589	0	0.058	0	0.044	100.618	0.049	0	0.001	198.46	LM64_VII_py6
101	0.079	0.033	98.442	0.06	0.042	0.072	0.004	99.932	0	0.036	0	198.7	LM64_VII_py7
102	0.011	0.013	95.258	0.065	0.031	0.084	0	100.815	0	0	0	196.277	LM64_VII_py8
103	0.026	0	97.707	0.107	0.061	0	0.001	99.953	0	0.063	0.034	197.952	LM64_VII_py9
104	0.035	0.11	97.205	0.107	0.066	0.015	0.002	99.916	0	0	0	197.456	LM64_VII_py10
105	0	0.026	97.654	0.041	0.036	0.061	0.036	100.077	0	0	0.021	197.952	LM64_X_py1
106	0.023	0.018	97.91	0	0.063	0	0	100.81	0.12	0	0.009	198.953	LM64_X_py2
107	0	0.106	97.206	0	0.064	0.042	0.008	100.469	0.154	0	0.007	198.056	LM64_X_py3
108	0	0.015	96.9	0	0.035	0	0.004	100.749	0.137	0	0	197.84	LM64_X_py4
109	0	0.113	98.014	0	0.051	0.03	0	100.395	0	0	0.008	198.611	LM64_X_py5
110	0	0.038	98.367	0.103	0.031	0.03	0.013	100.847	0.08	0	0	199.509	LM64_X_py6
111	0	0.026	96.945	0	0.071	0.015	0.048	100.22	0.032	0	0	197.357	LM64_X_py7
112	0	0.062	97.931	0	0.043	0	0	100.804	0	0	0	198.84	LM64_IX_py1.1
113	0.007	0.033	97.01	0.041	0.056	0.015	0	100.739	0.032	0	0.008	197.941	LM64_IX_py1.2
114	0	0.04	97.874	0.013	0.049	0	0.027	100.051	0	0	0.031	198.085	LM64_IX_py1.3
115	0.046	0.031	97.608	0.109	0.039	0.038	0	100.911	0	0	0.015	198.797	LM64_IX_py1.4
116	0	0.073	99.607	0.016	0.043	0.004	0.02	100.134	0.046	0	0.006	199.949	LM64_IX_py1.5
117	0.34	0	0.54	0.141	0.006	0	0	6.774	0	129.009	0.03	136.84	LM97B_I_unknown_1
118	0.01	0	0.304	0.029	0.026	0	0	65.181	0	44.266	0.085	109.901	LM97B_I_unknown_2
119	0	0	0.282	0	0.05	0	0	127.926	0.559	13.075	0.203	142.095	LM97B_I_unknown_3
120	0	0	1.233	0.145	0.024	0	0	48.741	0	34.364	0.122	84.629	LM97B_I_unknown_4
121	0.157	0	0.704	0.425	0	0	0	0.559	0	113.029	0.034	114.908	LM97B_IX_gn1
122	0.061	0	2.487	0.267	0	0	0	6.996	0	105.048	0.049	114.908	LM97B_IX_gn2
123	0.165	0	0.619	0.112	0	0	0	27.692	0	78.181	0.02	106.789	LM97B_IX_gn3
124	0.066	0	2.424	0.109	0.004	0	0.063	0.864	0	108.06	0.03	111.62	LM97B_IX_gn4
125	0.136	0	0	0	0.024	0	0	0.043	0	159.897	0.094	160.194	LM97B_XIII_gn1
126	0.201	0	0	0.069	0.012	0	0	0.003	0	163.617	0	163.902	LM97B_XIII_gn2
127	0.111	0	0	0	0.025	0	0	0.043	0	162.373	0.024	162.576	LM97B_XIII_gn3
128	0.033	0	0	0	0.043	0	0	0	0	165.295	0.071	165.442	LM97B_XIII_gn4
129	0.157	0	1.026	0.082	0	0	0	0.593	0	103.683	0.095	105.636	LM97B_XIII_gn5
130	0.218	0	1.447	0.081	0	0	0	1.009	0	100.374	0.193	103.322	LM97B_XIII_gn6
131	0.101	0	1.565	0.141	0	0	0	0.944	0	89.056	0.048	91.855	LM97B_XIII_gn7
132	0.108	0	2.174	0.106	0	0	0.033	0.921	0	100.358	0.037	103.737	LM97B_XIII_gn8
133	0.031	0.046	97.252	0.041	0.061	0	0	99.408	0	0.016	0	196.855	LM29_IX_py_1.1
134	0	0	99.503	0.125	0.037	0.023	0	99.021	0	0.071	0.009	198.789	LM29_IX_py_1.2
135	0.078	0.022	97.088	0.361	0.041	0.019	0	99.037	0	0	0.007	196.653	LM29_IX_py_1.3
136	0	0	96.737	0.16	0.048	0.099	0	99.121	0	0	0	196.165	LM29_IX_py_1.4
137	0	0.005	98.211	0.137	0.037	0	0	100.931	0	0	0	199.321	LM29_IX_py_2
138	0.101	0	14.482	0.106	0.068	0	0	0.068	0	108.525	0.088	123.438	LM29_IX_gn_1
139	0.078	0	14.636	0.147	0.054	0	0	0.159	0	106.868	0	121.942	LM29_IX_gn_2
140	0	0.064	98.423	0.069	0.053	0.027	0.017	99.95	0	0	0.007	198.61	LM29_IV_py_1
141	0.006	0.152	99.638	0.489	0.06	0	0	99.09	0.008	0	0.039	199.482	LM29_IV_py_2
142	0	0.004	97.6	0.078	0.046	0	0.022	96.584	0.097	0.016	0	194.447	LM29_IV_py_3
143	0.036	0.013	99.676	1.252	0.04	0.027	0.025	99.733	0.057	0	0.027	200.886	LM29_III_py_1
144	0	0.037	100.229	0.128	0.05	0.053	0	100.934	0	0	0.001	201.432	LM29_III_py_2
145	0.021	0.077	99.866	0.385	0.052	0.042	0	100.791	0	0	0.038	201.272	LM29_III_py_3
146	0	0.031	99.961	0.286	0.041	0	0.004	100.588	0.027	0.004	0.022	200.964	LM29_III_py_4
147	0	0	100.47	0.635	0.03	0.034	0	100.274	0.061	0.055	0	201.559	LM29_III_py_5
148	0.094	0	48.525	0	0.301	0.046	0	0.169	0	0	98.257	147.392	LM29_III_sp_1
149	0	0	49.77	0	0.318	0.038	0	0.33	0	0	98.303	148.759	LM29_III_sp_2
150	0	0	49.735	0	0.342	0.011	0	0.774	0	0	97.897	148.759	LM29_III_sp_3
151	0	0.013	50.331	0.115	0.322	0	0	0.619	0.051	0	99.084	150.535	LM29_III_sp_4
152	0	0	99.835	0.417	0.059	0.061	0.012	99.482	0.008	0	0	199.874	LM29_VI_py_1
153	0	0.117	101.033	0.085	0.033	0.008	0.008	99.843	0.143	0	0.002	201.272	LM29_VI_py_2
154	0.077	0.062	100.333	0.078	0.057	0.065	0	100.696	0.093	0.063	0.003	201.527	LM29_VI_py_3
155	0.011	0.071	100.101	0.582	0.028	0	0	100.14	0.046	0	0.007	200.986	LM29_VI_py_4
156	0.077	0	28.216	0	0.092	0	0.067	5.604	0	144.003	0.047	178.106	LM29_VI_gn_1
157	0	0.11	100.062	0.178	0.034	0.015	0.004	100.597	0.042	0.091	0.043	201.176	LM29_V_py_1.1
158	0.028	0.011	100.454	1.638	0.039	0.023	0.028	99.193	0.108	0	0	201.522	LM29_V_py_1.2
159	0	0.049	99.373	0.325	0.042	0	0.003	100.988	0	0	0.051	200.831	LM29_V_py_1.3
160	0.012	0.031	100.2	0.125	0.073	0.061	0.012	99.089	0	0.004	0.021	199.628	LM29_V_py_2
161	0.041	0.088	99.855	0.241	0.036	0.034	0.024	99.827	0.027	0	0	200.173	LM29_V_py_3
162	0.046	0.064	99.564	0.054	0.035	0	0	100.363	0	0	0	200.126	LM29_V_py_4
163	0.026	0	99.442	0.051	0.051	0.034	0	98.71	0.011	0.044	0.029	198.398	LM29_V_py_5
164	0	0.095	100.595	0.204	0.027	0.03	0	100.25	0.027	0.032	0	201.26	LM29_V_py_6
165	0.039	0.013	100.262	0.463	0.061	0.004	0	99.686	0.013	0.107	0	200.648	LM29_V_py_7
166	0	28.389	50.659	143.683	0.024	0.068	0.076	7.901	5.194	0	0.022	236.016	LM29_V_ttr_1
167	0	0	16.219	0.106	0.067	0.011	0	3.548	0	106.802	0	126.753	LM29_V_gn_1
168	0	0.079	99.646	0.159	0.053	0.019	0.001	100.82	0	0	0.016	200.793	LM29_XI_py_1
169	0.007	0.108	99.753	0.229	0.041	0	0	100.602	0	0	0	200.74	LM29_XI_py_2
170	0.059	0.09	100.682	1.006	0.061	0.049	0	99.745	0.057	0.182	0.034	201.965	LM29_XI_py_3
171	0.051	0.077	100.034	0.125	0.044	0	0.003	100.25	0.076	0	0.067	200.727	LM29_XI_py_4
172	0	0.073	100.658	0.104	0.038	0	0	100.403	0.135	0	0	201.411	LM29_XI_py_5
173	0.025	0.027	98.957	0.071	0.034	0.084	0.013	101.154	0.131	0	0	200.496	LM29_XI_py_6
174	0	0.015	99.931	0.329	0.044	0.03	0.011	100.529	0	0	0.019	200.908	LM29_XI_py_7
175	0.03	0.113	99.81	3.244	0.048	0	0.021	98.125	0.023	0.095	0.031	201.54	LM29_XI_py_8
176	0.046	0.06	99.69	0.04	0.055	0.038	0.02	100.468	0.025	0	0	200.442	LM29_XI_py_9
177	0.049	0	16.118	0.01	0.051	0.011	0	2.788	0	105.846	0.026	124.899	LM29_XI_gn_1
178	0.024	0	100.105	0.153	0.04	0.023	0.008	99.961	0.013	0.032	0.009	200.368	LM29_VIII_py_1
179	0.06	0.013	99.465	0.11	0.039	0.023	0.022	100.264	0	0.083	0.003	200.082	LM29_VIII_py_2
180	0.028	0.066	99.211	0.151	0.039	0.046	0	100.789	0.162	0	0	200.492	LM29_VIII_py_3
181	0.012	0.038	98.788	0.942	0.03	0	0.012	100.091	0.196	0	0.016	200.125	LM29_VIII_py_4
182	0.065	0	16.916	0.244	0.039	0	0.104	4.452	0.019	107.533	0.253	129.625	LM29_VIII_gn_1
183	0.131	0	16.756	0	0.049	0	0	1.938	0	110.2	0	129.074	LM29_VIII_gn_2
184	0	0.084	99.672	0.348	0.024	0.068	0	100.334	0	0	0	200.53	LM29_XII_py_1
185	0.017	0.011	99.393	0.363	0.02	0.004	0	100.961	0	0	0.015	200.784	LM29_XII_py_2
186	0	0.053	100.194	0.093	0.036	0	0	100.665	0.053	0	0	201.094	LM29_XII_py_3
187	0	0	99.836	0.038	0.07	0.034	0	101.142	0	0	0	201.12	LM29_II_py_1
188	0.014	0.013	99.298	0.207	0.054	0.027	0	100.633	0	0	0.049	200.295	LM29_II_py_2
189	0	0.013	99.816	0.043	0.057	0.046	0	102.007	0	0	0.046	202.028	LM29_II_py_3
190	0.018	0.033	98.931	0.748	0.033	0.049	0.012	99.858	0	0	0.007	199.689	LM29_X_py_1
191	0.007	0	98.028	0.35	0.048	0	0	100.514	0	0.024	0	198.971	LM29_X_py_2
192	0	0.113	97.76	0.933	0.052	0	0	100.064	0.019	0	0	198.941	LM29_X_py_3
193	0.071	0.051	99.515	0.091	0.024	0	0.011	100.576	0.025	0	0	200.364	LM29_X_py_4
194	0.029	0.057	100.562	0.674	0.045	0.027	0	100.303	0	0	0	201.697	LM29_X_py_5
195	0.019	0.004	99.9	1.835	0.058	0	0	99.682	0	0	0.002	201.5	LM29_I_py_1
196	0.033	0	98.593	1.195	0.035	0.038	0	100.427	0.013	0	0.032	200.366	LM29_I_py_2
197	0	0.02	99.188	0.078	0.06	0	0.019	101.464	0.04	0	0.007	200.876	LM29_I_py_3
198	0	0.086	98.414	0.31	0.071	0.008	0	100.601	0	0.19	0	199.68	LM29_I_py_4
199	0	0	99.882	0.266	0.053	0	0	100.222	0	0	0.001	200.424	LM29_I_py_5
200	0	0.022	100.259	0.062	0.032	0	0.024	101.05	0	0	0	201.449	LM29_I_py_1.1
201	0.009	0.055	99.428	0.135	0.042	0	0.036	101.357	0	0	0	201.062	LM29_I_py_1.2
202	0	0.06	99.017	0.09	0.027	0.049	0	100.607	0.053	0	0	199.903	LM29_I_py_1.3
203	0.055	0.002	99.001	0.103	0.057	0	0	99.699	0	0	0	198.917	LM29_I_py_1.4
204	0.047	0.046	99.672	0	0.054	0.015	0.025	101.061	0	0	0.004	200.924	LM29_I_py_1.5
205	0	0.04	99.899	0.096	0.052	0	0.003	100.646	0.053	0	0.054	200.843	LM29_I_py_1.6
206	0	0.029	101.062	0.815	0.033	0.011	0	100.454	0.032	0.095	0	202.531	LM29_VII_py_1
207	0.03	0.066	99.922	2.133	0.045	0.019	0	100.586	0	0	0.049	202.85	LM29_VII_py_2
208	0	0	99.693	0.057	0.046	0.008	0.028	100.428	0.078	0	0	200.338	LM29_VII_py_3
292	101.222	0	0.037	0.009	0.821	0	101.175	0	0	0	0	203.264	Std_Ag2Te_1
293	100.482	0	0.025	0.163	0.775	0	100.975	0	0	0	0	202.42	Std_Ag2Te_2
294	101.308	0	0.034	0.187	0.802	0.068	100.603	0.019	0	0	0.058	203.079	Std_Ag2Te_3
295	0	102.265	0.011	0.022	0.155	0	0	0.025	0	0	0	102.478	Std_InAs_1
296	0	101.95	0.008	0.091	0.158	0	0	0.071	0	0.008	0.048	102.334	Std_InAs_2
297	0	101.133	0	0.034	0.202	0.023	0	0	0.019	0	0.022	101.433	Std_InAs_3
298	0.03	0.038	98.302	0.003	0.062	0	0	99.826	0.08	0	0.033	198.374	Std_FeS2_1
299	0	0.057	98.888	0.057	0.025	0.015	0	99.908	0	0	0	198.95	Std_FeS2_2
300	0	0.119	99.409	0.009	0.043	0	0.02	99.835	0.002	0.067	0	199.504	Std_FeS2_3
301	0.04	0.015	55.934	101.179	0.009	0	0.024	69.626	0	0	0.048	226.875	Std_cpy_1
302	0.054	0	57.603	101.567	0.039	0.057	0	69.578	0	0.051	0.016	228.965	Std_cpy_2
303	0.058	0.031	57.295	100.998	0.033	0	0.013	69.251	0	0	0.014	227.693	Std_cpy_3
304	0	0.033	42.31	0.207	99.465	0.011	0.026	0.033	0.063	0	0	142.148	Std_CdS_1
305	0	0.038	42.743	0	99.865	0.004	0.035	0.02	0	0.067	0	142.772	Std_CdS_2
306	0	0.031	41.944	0.093	99.818	0	0.041	0	0	0	0.064	141.991	Std_CdS_3
307	0.036	0	0	0.933	0.111	100.613	0	0	0	0	0	101.693	Std_Au_1
308	0	0.002	0	1.055	0.088	100.007	0	0	0	0	0	101.152	Std_Au_2
309	0.006	0.027	0	0.893	0.07	100.559	0.016	0.061	0.086	0	0	101.718	Std_Au_3
310	0	1.879	0.024	0.009	0.17	0	0	0.015	101.311	0	0.015	103.423	Std_InSb_1
311	0	1.738	0	0.031	0.196	0	0	0	101.169	0.174	0.052	103.36	Std_InSb_2
312	0	1.875	0	0.112	0.194	0	0	0	101.313	0.004	0.073	103.571	Std_InSb_3
313	109.092	0	0.008	0.071	0.033	0	0	0.025	0	98.664	0	207.893	Std_PbTe_1
314	108.984	0	0.013	0	0.038	0	0	0.019	0	96.931	0.098	206.083	Std_PbTe_2
315	0.001	0	49.829	0.015	0.05	0.008	0.009	0	0	0	98.398	148.31	Std_sp_1
316	0	0	48.849	0.157	0.058	0	0	0	0.174	0	98.127	147.365	Std_sp_2
317	0	0	49.324	0.047	0.032	0	0.008	0.059	0	0	99.655	149.125	Std_sp_3
318	108.507	0	0	0.081	0.062	0	0	0	0	92.173	0	200.823	Std_PbTe_3
99999	107.858	0	0	0	0.08	0	0	0.051	0	97.575	0.045	205.609
Minimum	0	0	0	0	0	0	0	0	0	0	0	0.623
Maximum	109.175	102.939	101.062	190.706	99.865	101.179	101.175	154.845	102.56	165.295	100.994	245.53
Average	4.308	2.431	63.301	24.296	1.942	1.908	1.94	62.683	2.504	14.999	6.221	186.535
Sigma	20.831	14.318	37.353	44.402	13.472	13.684	13.696	44.187	14.464	38.564	23.615	41.372
No. of data 319

## Sheet: 2020-07-30_Fakos_Kraw
K-raw (intensity ratio)	Group : Haase	Sample : 20200730_FB	Page	1
No.	Sb	As	S	Cu	Cd	Pb	Fe	Zn	Total	Comment
1	0	97.856	0.023	0.032	0.181	0	0	0.079	98.171	InAs_
2	0	97.51	0.024	0.054	0.157	0.019	0.001	0	97.765	InAs_
3	0	97.966	0.001	0	0.183	0	0	0.012	98.162	InAs_
4	0	0.084	100.111	0.089	0.07	0	99.633	0	199.987	FeS_
5	0.049	0.114	100.145	0.043	0.067	0	99.564	0.015	199.997	FeS_
6	0	0.061	99.822	0.095	0.043	0	99.123	0	199.144	FeS_
7	0	0	99.534	0.072	0.054	0.004	99.095	0.017	198.776	FeS_
8	0	0.002	59.331	99.699	0.053	0.008	69.295	0	228.388	ccp_
9	0	0.017	59.366	99.466	0.019	0.061	69.11	0	228.039	ccp_
10	0	0	59.17	99.213	0.055	0	69.736	0	228.174	ccp_
11	0	0	43.226	0.049	98.624	0	0.015	0.03	141.944	CdS_
12	0	0	43.485	0	98.528	0	0.005	0	142.018	CdS_
13	102.109	1.184	0.004	0.076	0.176	0.065	0.03	0	103.644	InSb_
14	101.53	1.19	0.012	0.017	0.154	0.034	0	0.009	102.946	InSb_
15	101.567	1.017	0	0.126	0.155	0.053	0	0	102.918	InSb_
16	0.117	0	51.237	0.064	0.036	0.042	0.009	99.229	150.734	sph_
17	0	0	51.313	0.149	0.028	0	0	99.919	151.409	sph_
18	0	0	51.676	0.101	0.033	0	0	99.152	150.962	sph_
19	0	0	0.004	0	0.066	98.694	0	0.001	98.765	PbTe_
20	0	0	0	0.041	0.076	99.746	0.053	0.03	99.946	PbTe_
21	0	0	0.017	0	0.042	100.438	0.027	0	100.524	PbTe_
68	0	0	0.031	0	0.024	0	0.754	0.005	0.814	L64_IIb_sp_
69	0	0	0.108	0	0.02	0.079	0.742	0.014	0.963	L64_IIb_sp_
70	0	0	100.553	0.04	0.04	0	100.045	0.004	200.682	L64_IIb_py_
71	0	0	56.438	93.255	0.029	0	64.861	0.147	214.73	L64_IIb_cpy_
72	0	0.028	100.366	0.004	0.073	0	100.75	0	201.221	L64_IIb_py_
73	0.063	0.026	99.851	0.066	0.074	0.03	100.169	0.05	200.329	L64_IIb_py_
74	0.045	0	51.368	0.086	0.52	0	1.397	97.956	151.372	L64_IIIb_sp_
75	0	0	51.186	0.258	0.518	0.053	1.343	97.458	150.816	L64_IIIb_sp_
76	0	0	51.465	0.221	0.509	0.011	1.342	97.827	151.375	L64_IIIb_sp_
77	0.033	0	52.397	0.117	0.486	0.026	0.939	97.177	151.175	L64_IIIb_sp_
78	0.09	0	52.013	0.48	0.503	0.079	1.094	97.179	151.438	L64_IIIb_sp_
79	0.07	0.063	100.772	0.006	0.038	0	100.387	0.004	201.34	L64_IIIb_py_
80	0.018	0	0	0.001	0.002	0	1.057	0	1.078	LM64_XIIb_cp_
81	0.031	0	0.005	0.006	0.007	0	0.647	0	0.696	LM64_XIIb_cp_
82	0.074	0.101	0	0	0.02	0	2.946	0	3.141	LM64_Vb_sp_
83	0.082	0	0.003	0	0.028	0	0.583	0	0.696	LM64_Vb_sp_
84	0.033	0.017	0	0.076	0.02	0.045	0.558	0	0.749	LM64_Vb_sp_
85	0.065	0	0.24	0	0.041	0	1.383	0.025	1.754	LM64_Vb_sp_
86	0	0.078	99.599	0.03	0.047	0.144	99.98	0.058	199.936	LM64_XIIb_py
87	0.029	0.007	100.337	0.011	0.027	0.015	99.728	0.022	200.176	LM64_XIIb_py
88	0	0	7.295	6.491	0	108.45	6.558	0.098	128.892	LM64_XIIb_gn
89	0.006	0.017	0	0.019	0	0	0.293	0	0.335	LM64_XIIb_gn
90	0.006	0.038	99.262	0	0.043	0	99.536	0	198.885	LM64_XIIb_py_
91	0.027	0	0	0	0.004	0.004	0.25	0.014	0.299	LM64_XIIb_sp_
92	0	0.024	0.018	0	0.035	0	0.203	0	0.28	LM64_XIIb_sp_
93	0	0	51.786	0.047	0.434	0	0.42	98.492	151.179	LM29_Ib_sp_
94	0.022	0.005	51.487	0.019	0.358	0.03	0.319	98.885	151.125	LM29_Ib_sp_
95	0.045	0	51.61	0.043	0.305	0	0.297	99.551	151.851	LM29_Ib_sp_
96	0.035	0	51.628	0.059	0.509	0	0.14	98.982	151.353	LM29_Ib_sp_
97	0	0	51.573	0.047	0.464	0.004	0.135	99.218	151.441	LM29_Ib_sp_
98	0	0	51.212	0	0.396	0	0.106	98.654	150.368	LM29_Ib_sp_
99	0	0	51.551	0.02	0.354	0	0.304	98.724	150.953	LM29_Ib_sp_
100	0.039	0	51.478	0.039	0.361	0.026	0.513	98.85	151.306	LM29_Ib_sp_
101	0.133	0	51.293	0.127	0.291	0	0.32	99.344	151.508	LM29_IIb_sp_
102	0.106	0	51.518	0	0.291	0	0.307	99.945	152.167	LM29_IIb_sp_
103	0.063	0.023	51.547	0.088	0.3	0	0.133	99.523	151.677	LM29_IIb_sp_
104	0.033	0	51.516	0.031	0.307	0	0.46	98.02	150.367	LM29_IIb_sp_
105	0.022	0.014	53.04	0.004	0.357	0.034	1.052	98.068	152.591	LM29_IIb_sp_
106	0	0	53.31	0.088	0.325	0	0.74	97.942	152.405	LM29_IIb_sp_
107	0.002	0	51.438	0.037	0.512	0.008	3.548	94.983	150.528	LM29_IIb_sp_
108	0.088	0	51.041	0	0.471	0	1.076	98.257	150.933	LM29_Vb_sp_
109	0.071	0	51.453	0	0.478	0.057	0.591	97.968	150.618	LM29_Vb_sp_
110	5.808	28.492	50.474	142.394	0.033	0.03	7.528	0.022	234.781	LM29_Vb_unknwn-in-py_
111	0.014	0	100.339	1.04	0.049	0.042	99.085	0	200.569	LM29_Vb_py_
112	0.047	0	100.879	0.127	0.053	0.045	100.682	0	201.833	LM29_Vb_py_
113	0.018	0.023	99.932	0.117	0.076	0	101.882	0.014	202.062	LM29_VIIIb_py_
114	0	0	99.229	0	0.061	0	99.906	0	199.196	LM29_VIIIb_py_
115	0.014	0.044	99.979	0.946	0.066	0	100.157	0.02	201.226	LM29_VIIIb_py_
116	0.016	0.054	100.529	0.885	0.041	0	100.302	0.019	201.846	LM29_VIIIb_py_
117	0	0	12.869	0.113	0.071	109.091	1.288	0.036	123.468	LM29_VIIIb_gn_
118	0.119	0	0.236	0.029	0.027	0.034	1.47	0.026	1.941	LM29_VIIIb_sp_
119	0	0.05	100.33	0.223	0.059	0.008	99.45	0	200.12	LM29_XIV_py_
120	0.562	35.898	51.571	146.428	0.047	0.019	3.806	0	238.331	LM29_XIV_unknown_
121	19.011	20.552	43.37	132.482	0.171	0	10.868	0.326	226.78	LM29_XIV_unknown_
122	0.143	0	0	0.019	0.023	0	0.466	0.02	0.671	LM29_XIV_sp_
123	0.004	0.014	0.037	0.054	0.046	0	0.517	0	0.672	LM29_XIV_sp_
124	0.029	0	51.117	0	0.499	0	0.395	98.21	150.25	LM29_XV_sp_
125	0	0.026	51.165	0.066	0.485	0	0.142	98.956	150.84	LM29_XV_sp_
126	0	0.033	51.02	0.056	0.321	0.087	0.065	99.124	150.706	LM29_XV_sp_
127	0.078	0.037	51.076	0.121	0.329	0	0.412	98.39	150.443	LM29_XV_sp_
128	0	0	50.884	0.387	0.459	0.072	1.362	95.984	149.148	LM29_XV_sp_
129	0	0	50.367	0.017	0.444	0.027	1.052	94.923	146.83	LM29_XV_sp_
130	0.072	0	51.506	0.057	0.339	0.106	0.761	99.039	151.88	LM29_XV_sp_
131	0.076	0	51.553	0.082	0.304	0	0.843	98.436	151.294	LM29_XV_sp_
132	0.043	0	51.026	0.046	0.378	0	0.36	98.915	150.768	LM29_XV_sp_
133	0.027	0	51.445	0.026	0.374	0	0.538	98.555	150.965	LM29_XV_sp_
134	0	0.065	52.108	0.001	0.371	0.008	1.222	97.42	151.195	LM29_XV_sp_
135	0	99.309	0	0	0.187	0	0	0	99.496	Std_InAs_1
136	0	99.728	0.013	0.011	0.169	0.083	0.022	0.07	100.096	Std_InAs_2
137	0	97.97	0	0.066	0.186	0	0	0.023	98.245	Std_InAs_3
138	0	0.075	99.629	0	0.059	0.004	99.749	0	199.516	Std_FeS2_1
139	0.004	0	99.832	0.049	0.047	0.106	100.398	0	200.436	Std_FeS2_2
140	0	0	100.021	0.036	0.05	0.011	99.148	0.062	199.328	Std_FeS2_3
141	0	0.014	59.045	99.456	0.017	0	70.555	0.041	229.128	Std_cpy_1
142	0	0	59.129	100.719	0.026	0	69.917	0.012	229.803	Std_cpy_2
143	0	0.01	58.957	101.143	0.042	0	70.137	0.027	230.316	Std_cpy_3
144	0	0	43.02	0.087	99.531	0	0	0.048	142.686	Std_CdS_1
145	0.025	0.066	43.477	0.11	99.333	0	0.039	0.006	143.056	Std_CdS_2
146	0	0	43.129	0.05	99.56	0	0	0.031	142.77	Std_CdS_3
147	101.156	1.35	0	0.099	0.165	0	0	0.045	102.815	Std_InSb_1
148	100.85	1.289	0.005	0.113	0.186	0	0.019	0	102.462	Std_InSb_2
149	101.425	1.404	0.015	0	0.178	0	0.017	0	103.039	Std_InSb_3
150	0	0	51.278	0.126	0.036	0	0	98.665	150.105	Std_sph_1
151	0.012	0.007	51.062	0.109	0.039	0	0	99.728	150.957	Std_sph_2
152	0	0.026	51.4	0.113	0.02	0	0.027	100.21	151.796	Std_sph_3
153	0	0	0	0.017	0.051	99.135	0	0.016	99.219	Std_PbTe_1
154	0	0	0	0.017	0.071	98.599	0.011	0.029	98.727	Std_PbTe_2
155	0	0	0.011	0	0.055	99.71	0	0.003	99.779	Std_PbTe_3
Minimum	0	0	0	0	0	0	0	0	0.28
Maximum	102.109	107.686	100.879	146.428	99.56	109.091	122.973	100.21	238.331
Average	4.167	9.348	52.707	8.574	3.333	5.478	40.872	26.543	151.022
Sigma	19.649	26.996	38.393	29.706	17.545	22.632	46.113	43.666	63.15
No. of data 155

## Sheet: 20200729_Kaspakas_Sardes_kraw
K-raw (intensity ratio)	Group : Haase	Sample : 20200729_FB	Page	1
No.	Sb	As	S	Cu	Cd	Pb	Fe	Zn	Total	Comment
25	0	0.083	90.433	0.034	0.034	0.136	103.976	0	194.696	LEM19III-I_sph1
26	0	0	98.345	0.024	0.05	0.076	100.749	0.009	199.253	LEM19III-I_sph2
27	0.061	0.042	98.477	0	0.063	0.03	102.092	0.028	200.793	LEM19III-I_sph3
28	0.016	0.057	100.082	0	0.057	0	100.72	0.027	200.959	LEM19III-I_sph4
29	0.027	0.078	100.187	0	0.038	0.042	100.11	0.048	200.53	LEM19III-I_sph5
30	0.065	0.026	100.402	0.019	0.047	0	100.027	0.023	200.609	LEM19III-I_sph6
31	0	0.03	100.508	0.054	0.032	0	100.611	0.035	201.27	LEM19III-I_sph7
32	0	0.026	0.019	0	0.035	0.004	0.765	0.001	0.85	LEM19III-I_sph8
33	0.106	0.08	98.647	0.058	0.058	0.03	100.221	0	199.2	LEM19III-I_sph9
34	0	0	60.942	0	0.045	79.762	49.876	0	190.625	LEM19III-I_gn_
35	0.126	0	29.004	0	0.072	150.054	0.177	0	179.433	LEM19III-I_gn_
36	0	0	28.547	0	0.039	149.317	0.338	0.096	178.337	LEM19III-I_gn_
37	0.01	0.024	100.387	0	0.053	0	100.103	0.005	200.582	LEM19III-IV_Sph
38	0.033	0.071	100.033	0.127	0.064	0	99.19	0.02	199.538	LEM19III-IV_Sph_
39	0	0.049	101.144	0.024	0.056	0.023	98.805	0	200.101	LEM19III-IV_Sph_
40	0	0.075	99.359	0	0.045	0.215	99.513	0.078	199.285	LEM19III-IV_Sph_
41	0	0.045	100.882	0.074	0.046	0	100.484	0.053	201.584	LEM19III-IV_Sph_
42	0	0	51.856	0.329	0.462	0	1.321	97.298	151.266	LEM19III-IV_
43	0	0	52.127	1.431	0.46	0	2.189	96.353	152.56	LEM19III-IV_
44	0.133	0	51.594	0.474	0.45	0.068	1.72	97.098	151.537	LEM19III-IV_
45	0	0	0.33	0.793	0.078	1.676	1.181	101.429	105.487	LEM19III-IV_
46	0	0	0.693	1.324	0.058	0.989	5.527	88.997	97.588	LEM19III-IV_
47	47.355	3.149	41.703	100.472	0.266	0	3.555	13.221	209.721	LEM19III-IV_
48	0	0	6.946	0	0.014	74.768	0.709	0.075	82.512	LEM19III-IV_
49	0	0	3.654	0	0.049	55.761	0.017	0	59.481	LEM19III-IV_
50	0.008	0.155	100.457	0	0.069	0.008	100.139	0.044	200.88	LEM19III-II_
51	0.033	0.016	100.757	0	0.049	0.019	100.598	0	201.472	LEM19III-II_
52	0.049	0.144	100.883	0	0.043	0	100.637	0.029	201.785	LEM19III-II_
53	0.004	0	100.472	0.095	0.061	0	100.818	0	201.45	LEM19III-II_
54	0	0.064	100.433	0.054	0.035	0	100.349	0.013	200.948	LEM19III-II_
55	0.037	0.028	100.836	0	0.045	0	100.232	0.065	201.243	LEM19III-II_
56	0.045	0.057	100.545	0.023	0.058	0.023	99.363	0	200.114	LEM19III-II_
57	0	0.021	100.769	0.064	0.022	0.155	101.357	0.012	202.4	LEM19III-II_
58	0	0	2.436	0.04	0	91.44	6.075	0.053	100.044	LEM19III-II_
59	0	0.09	1.854	0.097	0.162	0.336	0.191	0.109	2.839	LEM19III-II_
60	0	0	9.122	0.047	0.017	27.824	44.38	0.015	81.405	LEM19III-II_
61	0.102	0	37.571	0	0.017	0	87.733	0.061	125.484	LEM19III-II_
62	0	0.017	0.255	0.053	0.016	0.053	35.354	0.024	35.772	LEM19III-II_
63	0	0	0.221	0.011	0.025	0.068	18.436	0	18.761	LEM19III-II_
64	0	0.007	0.425	0.04	0.01	0.125	34.978	0.032	35.617	LEM19III-II_
65	0	0.061	100.04	0	0.051	0.125	99.84	0.012	200.129	LEM19III-III_
66	0.067	0.033	100.682	0.019	0.022	0	99.328	0.009	200.16	LEM19III-III_
67	0	0.035	100.214	0	0.041	0.121	100.243	0	200.654	LEM19III-III_
68	0.024	0	101.178	0.064	0.07	0.03	100.042	0.001	201.409	LEM19III-III_
69	0.045	0.023	100.408	0.043	0.031	0	99.646	0	200.196	LEM19III-III_
70	0	0.342	100.636	0.021	0.058	0	100.267	0	201.324	LEM19III-III_
71	0.033	0.063	101.203	0.034	0.032	0.03	100.225	0.001	201.621	LEM19III-III_
72	0.02	0.033	100.938	0.104	0.065	0	99.919	0	201.079	LEM19III-III_
73	0.067	0.009	100.122	0.115	0.026	0.015	100.206	0	200.56	LEM19III-III_
74	0	0.05	100.692	0.03	0.042	0	99.81	0	200.624	LEM19III-III_
75	0	0.035	100.195	0.07	0.04	0.072	99.511	0	199.923	LEM19III-III_
76	0	0	100.597	0	0.062	0.03	100.169	0	200.858	LEM19III-III_
77	0.118	0	15.595	0.007	0.031	0	0.104	0.021	15.876	LEM19III-III_
78	0.051	0.118	99.97	0	0.031	0	99.535	0	199.705	LEM33_I_
79	0	0.322	100.298	0	0.051	0.023	99.529	0	200.223	LEM33_I_
80	0.027	0.035	100.874	0.054	0.032	0	99.288	0.02	200.33	LEM33_I_
81	0	79.958	0.373	0.058	0.027	0.397	48.172	0.043	129.028	LEM33_I_
82	0.053	73.469	0.304	0.02	0.013	0.2	41.647	0.025	115.731	LEM33_I_
83	0.3	2.152	98.701	0.047	0.069	0.015	98.802	0.005	200.091	LEM33_II_
84	0.031	0.113	99.362	0.046	0.034	0.004	99.6	0.014	199.204	LEM33_II_
85	1.853	107.131	35.894	0.058	0.064	0.004	83.111	0	228.115	LEM33_II_
86	0	20.692	12.723	0.219	0	50.39	14.415	0.017	98.456	LEM33_II_
87	0.669	111.343	35.971	0	0.061	0.053	83.545	0	231.642	LEM33_II_
88	0.012	0.141	99.711	0.061	0.047	0	99.702	0.007	199.681	LEM33_II_
89	1.119	101.582	28.23	0.206	0.045	0	74.482	0	205.664	LEM33_II_
90	1.629	79.688	0.496	0.198	0.044	0.076	53.593	0.03	135.754	LEM33_II_
91	0.83	81.015	0.311	0.14	0.051	0.076	56.555	0.04	139.018	LEM33_II_
92	1.156	79.7	0.346	0.295	0.022	0.038	54.22	0.039	135.816	LEM33_II_
93	1.664	104.666	36.582	0.077	0.023	0	83.176	0.002	226.19	LEM33_II_
94	1.111	109.678	36.356	0.112	0.057	0.064	83.42	0.014	230.812	LEM33_II_
95	0.296	8.537	79.596	0.061	0.037	0.264	90.984	0.012	179.787	LEM33_II_
96	0	0.089	99.928	0.181	0.044	0	98.893	0.018	199.153	LEM33_II_
97	1.46	81.508	0.341	0.224	0.044	0.106	52.916	0	136.599	LEM33_III_
98	1.45	105.172	34.799	0.07	0.039	0.151	82.61	0	224.291	LEM33_III_
99	0.149	0.229	99.363	0.104	0.031	0.117	98.991	0.027	199.011	LEM33_III_
100	0	0.012	99.313	0.043	0.047	0.053	98.311	0	197.779	LEM33_III_
101	0	0.108	100.031	0.064	0.045	0	99.369	0	199.617	LEM33_III_
102	0.126	0.238	99.919	0	0.061	0.06	100.509	0.013	200.926	LEM33_III_
103	0.685	104.882	36.374	0.073	0.072	0.238	82.769	0	225.093	LEM33_III_
104	0.895	74.709	0.72	0.585	0.019	0.045	50.421	0	127.394	LEM33_IV
105	1.209	75.748	0.454	0.561	0.027	0.181	51.819	0.028	130.027	LEM33_IV_
106	1.005	4.222	14.846	0.374	0.025	2.307	61.946	0.003	84.728	LEM33_IV_
107	0.528	0.102	5.943	0	0.029	96.823	2.937	0.02	106.382	LEM33_IV_
108	0	0	51.363	0.594	0.602	0	1.675	95.791	150.025	LEM19III_II
109	0.065	0	50.967	0.923	0.611	0	2.058	95.087	149.711	LEM19III_II
110	0.084	0.812	99.008	0.03	0.051	0	99.838	0	199.823	LEM19III_II
111	0	1.213	98.072	0.024	0.036	0.332	100.06	0.092	199.829	LEM19III_II
112	0.112	0	50.748	0.535	0.652	0.03	1.226	96.821	150.124	LEM19III_II
113	0	0	50.689	0.132	0.635	0.079	1.819	96.422	149.776	LEM19III_I_
114	0	0	0.493	0.347	0.007	0	0.031	0.004	0.882	LEP19III_I
115	0.02	0.036	100.554	0.007	0.032	0.015	100.178	0.834	201.676	LEM19III_I_
116	0	0.068	100.107	0.067	0.045	0.215	98.263	0.006	198.771	LEM19III_I_
117	0.061	0	50.749	0.122	0.611	0	1.542	96.426	149.511	LEM19III_III_
118	0.022	0	51.21	0.007	0.617	0	2.037	96.21	150.103	LEM19III_III_
119	0	0	0.024	0.302	0.615	0.502	0.477	78.919	80.839	LEM19III_III_
120	0	0.019	100.001	0.031	0.067	0	100.38	0	200.498	LEM35_I
121	0	0.059	95.514	8.225	0.06	0	97.763	0	201.621	LEM35_I
122	0.041	0.023	96.319	0	0.061	0	102.892	0.004	199.34	LEM35_I
123	0	0.066	100.159	0.001	0.046	0	99.676	0.001	199.949	LEM35_I
124	0	0	76.122	51.413	0.045	0	86.28	0.094	213.954	LEM35_I
125	0	0.005	58.842	99.809	0.029	0.102	69.791	0	228.578	LEM35_II_
126	0	0.026	91.583	17.205	0.058	0.076	93.716	0	202.664	LEM35_II_
127	0.037	0	99.989	0.098	0.046	0	99.949	0.006	200.125	LEM35_II_
128	0	0.009	95.944	0.187	0.057	0.306	101.653	0.025	198.181	LEM35_II_
129	0	0.033	100.32	0.118	0.04	0.045	99.636	0.008	200.2	LEM35_II_
130	0.049	0.005	99.78	0.019	0.048	0	100.505	0	200.406	LEM35_III_
131	0.014	0.158	0.003	0.009	0.07	0.121	148.589	0.006	148.97	LEM35_III_
132	0	0.096	99.223	0	0.047	0	99.16	0.025	198.551	LEM35_III_
133	0	0	70.702	0.014	0.064	0	129.937	0.035	200.752	LEM35_III_
134	0	0.047	100.162	0.03	0.036	0.004	100.171	0.009	200.459	LEM35_III_
135	0.12	0	0.195	0	0.031	24.885	2.858	0.022	28.111	LEM35_III_
136	0	0.066	99.408	0.038	0.04	0.106	100.537	0	200.195	LEM35_III_
137	0.024	0.012	0.39	0.019	0.036	0	2.9	0.012	3.393	LEM35_III_
138	0.057	0	0.024	0.05	0.035	0	1.617	0.02	1.803	LEM35_III_
139	0	0.023	99.616	0.023	0.044	0.008	100.154	0	199.868	LEM35_III_
140	0	0.101	7.117	0.019	0.009	0.057	21.967	0.027	29.297	LEM35_III_
141	0.098	0.101	99.565	0	0.077	0	99.636	0.027	199.504	LEM35_III_
142	0	0.042	100.711	0.06	0.047	0	100.083	0	200.943	LEM35_III_
143	0	0.028	0.038	0.041	0.017	0	1.384	0.014	1.522	LEM35_III_
144	0	0.075	99.651	0.011	0.035	0.155	99.611	0	199.538	LEM35_III_
145	0	0.089	99.772	0.075	0.062	0	99.935	0	199.933	LEM35_III_
146	0.08	0	99.631	0.038	0.047	0	99.438	0	199.234	LEM35_III_
147	0	0	0	0.007	0.041	0	1.197	0.048	1.293	LEM35_III_
148	0	0.089	99.34	0.075	0.058	0.019	99.781	0.016	199.378	LEM35_III_
149	0	0.036	99.924	0	0.038	0	98.968	0	198.966	LEM35_III_
10	0	98.595	0.014	0.019	0.169	0.011	0	0	98.808	std_InAs_
11	0	98.42	0.006	0.093	0.218	0.049	0	0.011	98.797	std_InAs_
12	0	99.913	0	0.04	0.163	0	0.014	0.002	100.132	std_InAs_
150	0	99.063	0.001	0.074	0.185	0.053	0	0.067	99.443	InAs_
151	0	98.315	0.003	0	0.156	0.049	0.069	0	98.592	InAs_
152	0	99.077	0.005	0.194	0.156	0.117	0.037	0	99.586	InAs_
4	0.029	0.047	100.253	0.019	0.058	0	99.953	0.041	200.4	std_FeS2_
5	0	0.078	99.508	0.076	0.044	0	99.471	0.031	199.208	std_FeS2_
6	0.008	0.073	99.749	0.007	0.02	0.068	100.418	0.048	200.391	std_FeS2_
7	0.065	0.063	99.213	0.019	0.038	0	99.995	0.033	199.426	std_FeS2_
8	0	0	99.136	0.12	0.065	0.015	100.211	0	199.547	std_FeS2_
9	0	0.04	99.76	0	0.018	0.11	99.692	0	199.62	std_FeS2_
153	0.043	0.078	99.793	0.111	0.067	0	99.133	0	199.225	FeS2_
154	0.022	0.096	99.694	0.066	0.045	0.079	100.039	0	200.041	FeS2_
155	0.027	0.03	100.303	0.021	0.032	0	99.285	0.031	199.729	FeS2_
156	0	0	100.185	0.046	0.058	0	100.065	0.012	200.366	FeS2_
157	0	0.019	100.386	0	0.059	0	99.348	0.001	199.813	FeS2_
158	0.01	0.002	100.136	0	0.043	0	99.558	0.023	199.772	FeS2_
1	0	0.023	58.758	100.437	0.029	0	70.052	0	229.299	std_CPY_1
2	0	0	58.654	100.382	0.053	0.038	69.97	0	229.097	std_CPY_2
3	0	0	59.07	99.66	0.051	0.038	69.758	0.013	228.59	std_CPY_3
159	0	0.023	58.378	100.86	0.033	0.053	70.037	0	229.384	CCP_
160	0	0	59.208	100.461	0.063	0.008	70.268	0.007	230.015	CCP_
13	0.053	0	42.685	0.134	98.619	0	0	0.005	141.496	std_CdS_
14	0	0	42.633	0.038	99.038	0	0.012	0.053	141.774	std_CdS_
15	0	0	42.799	0	99.086	0.045	0.01	0	141.94	std_CdS_
161	0.035	0	42.749	0.023	99.773	0	0.061	0.015	142.656	CdS_
162	0	0	43.203	0.14	99.761	0	0	0.004	143.108	CdS_
163	0.065	0.01	42.545	0.215	100.149	0	0.018	0.103	143.105	CdS_
164	100.218	1.455	0.009	0	0.161	0.144	0.015	0.014	102.016	InSb_
16	99.397	1.294	0.009	0.107	0.186	0	0.055	0.021	101.069	std_InSb_
17	100.722	1.122	0.001	0.094	0.157	0	0.03	0.007	102.133	std_InSb_
18	101.345	1.342	0.004	0	0.187	0	0.015	0	102.893	std_InSb_
165	99.466	1.321	0	0	0.192	0	0.053	0	101.032	InSb_
166	99.059	1.305	0.016	0.135	0.182	0.034	0	0.033	100.764	InSb_
19	0	0	51.082	0.122	0.033	0	0.032	99.697	150.966	std_Sph_
20	0	0	50.859	0.04	0.048	0	0	99.703	150.65	std_Sph_
21	0	0	50.886	0.1	0.053	0.064	0.01	100.009	151.122	std_Sph_
167	0	0.012	50.941	0.007	0.052	0	0	99.339	150.351	SPH_
168	0.029	0	50.819	0.056	0.053	0	0	99.393	150.35	SPH_
169	0	0	50.806	0.047	0.042	0	0	99.088	149.983	SPH_
22	0	0	0.006	0.15	0.086	101.527	0	0	101.769	std_PbTe_
23	0	0	0	0	0.025	101.793	0.043	0.006	101.867	std_PbTe_
24	0	0	0.005	0	0.047	100.735	0	0.046	100.833	std_PbTe_
170	0	0	0	0	0.052	102.066	0.001	0	102.119	PbTe_
171	0	0	0	0.036	0.037	101.039	0.014	0.086	101.212	PbTe_
172	0	0	0	0.155	0.042	101.528	0.021	0.017	101.763	PbTe_
99999	0.057	0	50.952	0.109	0.047	0.008	0.015	99.263	150.451
Minimum	0	0	0	0	0	0	0	0	0.85
Maximum	101.345	111.343	101.203	100.86	100.149	150.054	148.589	101.429	231.642
Average	3.864	11.663	58.689	4.597	3.531	8.219	59.343	10.694	160.599
Sigma	18.635	30.875	42.258	20.141	18.226	27.663	45.803	30.285	59.241
No. of data 173
uncertainty	0.360783	0.2415	3.16234	0.194501	0.235934	0.199101	0.117324	0.13385

[truncated: 1 more sheets: 20200730_Kaspakas_Sardes_Kraw]
