# Supplementary material for: In-situ trace element and S isotope systematics in pyrite from three porphyry-epithermal prospects, Limnos Island, Greece
Source: Frontiers journal article supplement (doi:10.3389/feart.2022.916107), 2022-10-10
Supplement: Table_3.XLSX [file Table_3.XLSX]

## Sheet: Tabelle1
Table A2: XRD results, all results are in wt. %. Mineral abbreviations: qz = quartz, hem = hematite, nac= nacrite ab = albite, plag = plagioclase, mkl = microcline, sa = sanidine, alu = alunite, kao = kaolinite, dol = dolomite, cc = calcite, whi = witherite, mc = muscovite, smc = smectite, goe = goethite, py = pyrite, chl = chlorite, hbl = hornblende, dio = diopside, bt = biotite, mag = magnetite.
Samples (Fakos)	stage	qz	hem	nac	ab	plag	mkl	sa	alu/kao	dol	cc	whi	mc	smc	goe	py	chl	Natrojarosit	hbl	dio	bt	mag
LM-JB-04	Porphyry	–	–	18	11	10	20	–	–	–	–	14	2	7	–	–	–	–	–	–	–	–
LM-JB-05	Porphyry	62.61	–	1.77	–	–	–	–	–	3.38	–	–	–	–	32.24	–	–	–	–	–	–	–
LM-JB-17	Porphyry	15	–	–	8	34	5	31	–	–	–	–	–	–	–	–	–	–	2	–	4	1
LM-JB-18	Porphyry	14	–	–	5	25	12	29	–	–	–	–	–	–	–	–	–	–	–	–	6	6
LM-JB-20	Porphyry	2	–	–	4	35	2	34	–	–	–	–	–	–	–	–	–	–	–	15	3	4
LM-JB-03	Transitional	–	11	–	–	–	–	–	37	36	2	–	–	–	–	–	–	–	–	–	–	–
LM-JB-13	Transitional	66	–	–	–	–	2	–	–	–	–	–	32	–	–	–	–	–	–	–	–	–
LM-JB-14	Transitional	66	–	–	–	–	1	–	–	–	–	–	33	–	–	–	–	–	–	–	–	–
LM-JB-16	Transitional	66	–	1	–	–	–	–	–	–	2	–	30	–	–	–	–	–	–	–	–	–
LM-JB-01	Transitional, Secondary alteration	48.4	23.85	27.74	–	–	–	–	–	–	–	–	–	–	–	–	–	–	–	–	–	–
LM-JB-02	Transitional, Secondary alteration	14	14	2	12	7	19	16	–	–	–	–	–	–	–	–	–	–	–	–	–	–
LM-JB-10	Transitional, Secondary alteration	15	–	–	17	3	4	26	–	–	–	–	34	–	–	–	–	1	–	–	–	–
LM-JB-12	epithermal	69	–	–	–	–	1	–	–	–	–	–	30	–	–	–	–	–	–	–	–	–
LM-JB-06	epithermal	32	–	3	–	–	–	–	–	8	6	–	11	–	–	1	39	–	–	–	–	–
LM-JB-15 (1)	epithermal	23	–	–	22	7	5	15	–	–	–	–	7	–	–	–	8	–	7	5	–	–
LM-JB-15 (2)	epithermal	18	–	2	6	21	4	16	–	–	–	–	4	–	–	4	12	–	11	1	–	–
LM-JB-15 (3)	epithermal	23	–	–	3	16	2	4	–	–	6	–	11	–	–	–	16	–	5	–	14	–
