# Supplementary material for: In-situ trace element and S isotope systematics in pyrite from three porphyry-epithermal prospects, Limnos Island, Greece
Source: Frontiers journal article supplement (doi:10.3389/feart.2022.916107), 2022-10-10
Supplement: Table_4.XLSX [file Table_4.XLSX]

## Sheet: all_LA-ICP-MS
Table A4: all LA-ICP-MS data (sheet 1) and coorelating RSD as well as SD for the used primary and secondary standards in Sheets 2-4
date	spot ID	type	mineral		Mn55 [ppm]	Mn55_ppm_2SE(int)	Mn55_ppm_ LOD_Howell	Fe57 [ppm]	Fe57_ppm_2SE(int)	Fe57_ppm_ LOD_Howell	Co59 [ppm]	Co59_ppm_2SE(int)	Co59_ppm_ LOD_Howell	Ni60 [ppm]	Ni60_ppm_2SE(int)	Ni60_ppm_ LOD_Howell	Cu63 [ppm]	Cu63_ppm_2SE(int)	Cu63_ppm_ LOD_Howell	Zn67 [ppm]	Zn67_ppm_2SE(int)	Zn67_ppm_ LOD_Howell	Ga69 [ppm]	Ga69_ppm_2SE(int)	Ga69_ppm_ LOD_Howell	Ga71 [ppm]	Ga71_ppm_2SE(int)	Ga71_ppm_ LOD_Howell	Ge73 [ppm]	Ge73_ppm_2SE(int)	Ge73_ppm_ LOD_Howell	Ge74 [ppm]	Ge74_ppm_2SE(int)	Ge74_ppm_ LOD_Howell	As75 [ppm]	As75_ppm_2SE(int)	As75_ppm_ LOD_Howell	Se77 [ppm]	Se77_ppm_2SE(int)	Se77_ppm_ LOD_Howell	Ag109 [ppm]	Ag109_ppm_2SE(int)	Ag109_ppm_ LOD_Howell	Cd111 [ppm]	Cd111_ppm_2SE(int)	Cd111_ppm_ LOD_Howell	In115 [ppm]	In115_ppm_2SE(int)	In115_ppm_ LOD_Howell
2020-06-09	LM64_I_py7	porphyry	pyrite		n.a.			464335	63431.7	40.056	9.89023	1.76801	0.0586233	168.237	23.0105	0.541892	26.6747	17.3509	0.785922	6.2637	1.96553	6.2637	n.a.			n.a.			n.a.			n.a.			1.57531	0.657961	0.457151	134.602	30.2245	2.24867	10.072	5.41181	0.079315	0.411169	0.12409	0.411169	n.a.
2020-06-09	LM64_I_py8	porphyry	pyrite		n.a.			454129	19101.2	40.2394	21.7447	11.2771	0.0668619	122.124	58.3891	0.474939	5.85716	4.7529	0.527356	3.58619	2.28021	3.58619	n.a.			n.a.			n.a.			n.a.			2.63816	1.33308	0.355345	94.3649	14.0671	2.61929	3.59956	1.07783	0.0564516	0.186186	0.113675	0.186186	n.a.
2020-06-09	LM64_II_py7	porphyry	pyrite		n.a.			469155	57023.6	21.632	60.8115	34.0618	0.0525071	442.468	210.09	0.326894	2.90157	2.5587	0.575626	4.44752	2.64529	4.44752	n.a.			n.a.			n.a.			n.a.			5.09	3.29356	0.278344	66.6489	39.2962	1.68914	0.057785	0.0436489	0.057785	0.168647	0.128453	0.168647	n.a.
2020-06-09	LM64_II_py6	porphyry	pyrite		n.a.			495110	72288.9	19.8953	47.4193	7.59893	0.0324672	201.726	40.9554	0.288155	1909.21	586.963	0.672952	3.9816	6.66631	3.9816	n.a.			n.a.			n.a.			n.a.			2663.88	595.82	0.289646	38.796	4.61902	1.46673	0.8779	0.948399	0.0427934	0.229217	0.0673023	0.229217	n.a.
2020-06-09	LM64_II_py2.3	porphyry	pyrite		n.a.			462390	47119.6	28.3514	16.3317	3.42008	0.0439042	111.523	15.6866	0.445473	4.14906	1.05695	0.682152	5.08123	2.08293	5.08123	n.a.			n.a.			n.a.			n.a.			0.676478	0.444348	0.345664	48.0654	8.53876	1.69625	2.00322	1.33982	0.0289323	0.2662	0.0989621	0.2662	n.a.
2020-06-09	LM64_II_py2.2	porphyry	pyrite		n.a.			474418	52331.1	21.7297	188.7	102.099	0.0735296	555.19	187.694	0.336724	15.0295	6.46132	0.75168	3.88573	2.36938	3.88573	n.a.			n.a.			n.a.			n.a.			10.0968	2.85575	0.288666	50.1984	19.1271	2.074	0.465761	0.25918	0.0212791	0.239047	0.0789875	0.239047	n.a.
2020-06-09	LM64_II_py2.1	porphyry	pyrite		n.a.			506618	62335.9	26.839	192.586	20.9114	0.0359838	713.469	94.7618	0.265161	15.5645	3.00976	0.743391	3.08022	1.11548	3.08022	n.a.			n.a.			n.a.			n.a.			13.9671	4.01419	0.180838	82.8357	8.59023	1.2802	0.898808	0.802233	0.0239028	0.336795	0.0785178	0.336795	n.a.
2020-06-09	LM64_III_py4	porphyry	pyrite		n.a.			413648	54943.8	17.4905	157.547	64.4481	0.0565795	412.46	102.81	0.283668	8.65714	2.25993	0.601053	5.18288	2.0022	5.18288	n.a.			n.a.			n.a.			n.a.			9.09159	4.50828	0.36728	103.72	14.0391	1.35197	0.42646	0.102297	0.0304291	0.217569	0.10315	0.217569	n.a.
2020-06-09	LM64_III_py5	porphyry	pyrite		n.a.			547134	19914.6	39.6184	238.733	137.197	0.0795382	603.413	144.431	0.497813	6.00551	4.90168	1.02449	4.56089	1.84778	4.56089	n.a.			n.a.			n.a.			n.a.			7.22985	2.2471	0.601082	88.956	50.7441	1.89264	10.5622	20.6691	0.0677214	0.294227	0.135611	0.294227	n.a.
2020-06-09	LM64_V_py_2	porphyry	pyrite		n.a.			504860	49337.4	19.4891	1.59344	1.18747	0.0274566	31.4637	26.8566	0.55602	2.76671	1.77572	0.705629	3.184	2.26213	3.184	n.a.			n.a.			n.a.			n.a.			1.95186	0.783733	0.251652	156.412	30.557	2.60922	0.0322234	0.0357613	0.0322234	0.145474	0.0824777	0.145474	n.a.
2020-06-09	LM64_V_py_9	porphyry	pyrite		n.a.			447101	61771.3	25.8271	53.7158	47.8459	0.0458048	518.766	233.742	0.269845	5.05417	2.36579	0.853309	4.43057	3.08476	4.43057	n.a.			n.a.			n.a.			n.a.			1.58429	1.28801	0.275213	103.95	17.335	2.16985	0.0362608	0.017312	0.0362608	0.285718	0.0805304	0.285718	n.a.
2020-06-09	LM64_V_py_6	porphyry	pyrite		n.a.			462961	43863.5	23.5607	94.8712	109.424	0.0424915	721.481	322.709	0.381641	1.60948	0.648044	0.646358	2.78946	1.74603	2.78946	n.a.			n.a.			n.a.			n.a.			2.93288	1.58427	0.258208	186.558	30.8303	1.85781	0.150701	0.225627	0.0240961	0.108041	0.147299	0.108041	n.a.
2020-06-09	LM64_V_py_3	porphyry	pyrite		n.a.			564193	69966.9	37.1203	6.60105	1.41	0.0625632	169.561	18.1026	0.441092	3.23433	2.62981	1.05881	5.50263	5.02767	5.44413	n.a.			n.a.			n.a.			n.a.			3.14359	0.253164	0.189457	250.434	40.0497	3.07961	1.02982	0.951393	0.0365096	0.149394	0.0144596	0.149394	n.a.
2020-06-09	LM64_VI_py6	porphyry	pyrite		n.a.			482849	92175.8	33.84	137.713	36.0211	0.0372318	918.509	139.736	0.416025	4.50244	1.51286	1.08001	4.13012	1.35598	4.13012	n.a.			n.a.			n.a.			n.a.			3.24402	1.33613	0.550606	60.043	14.2428	2.72746	0.10421	0.11518	0.0791083	0.34781	0.0986217	0.34781	n.a.
2020-06-09	LM64_VI_py5	porphyry	pyrite		n.a.			528138	34334.1	31.7535	59.2429	11.8493	0.0595255	149.395	21.6128	0.404208	9.53361	5.2047	0.619386	5.79789	3.51726	5.79789	n.a.			n.a.			n.a.			n.a.			10.1616	1.87816	0.310137	272.641	17.5085	1.88576	0.3352	0.361775	0.0549129	0.188297	0.140394	0.188297	n.a.
2020-06-09	LM64_VI_py4	porphyry	pyrite		n.a.			581810	188683	34.6799	217.548	8.77659	0.0541779	293.34	61.1047	0.466097	41.8705	44.6729	0.870156	5.77814	6.37073	5.77814	n.a.			n.a.			n.a.			n.a.			40.5753	38.0596	0.304943	202.02	36.9211	1.40475	1.3774	0.323855	0.0530116	0.132897	0.131497	0.132897	n.a.
2020-06-09	LM64_VII_py1	porphyry	pyrite		n.a.			447863	29642.9	32.3538	43.568	8.04936	0.0523601	290.067	32.67	0.406929	0.865085	0.411564	0.470907	5.95267	2.57994	5.95267	n.a.			n.a.			n.a.			n.a.			8.4067	3.29153	0.361125	141.487	20.5772	1.9778	0.036803	0.0227145	0.036803	0.0954902	0.110566	0.0942323	n.a.
2020-06-09	LM64_VII_py5	porphyry	pyrite		n.a.			466311	43701	23.444	7.18194	1.60964	0.0584124	115.336	41.1002	0.419534	0.824387	0.563439	0.73136	4.3216	2.52786	4.3216	n.a.			n.a.			n.a.			n.a.			7.57375	11.7266	0.293915	176.683	12.3478	1.63285	0.0666324	0.092746	0.0310182	0.175717	0.19663	0.175717	n.a.
2020-06-09	LM64_VII_py7	porphyry	pyrite		n.a.			522908	61068.1	25.0448	332.913	155.444	0.0378817	396.056	128.645	0.460774	4.73512	2.37695	0.592928	3.6125	1.81016	3.6125	n.a.			n.a.			n.a.			n.a.			85.0329	37.1467	0.284094	127.576	7.48057	2.87777	0.289509	0.118253	0.0352214	0.182979	0.282811	0.182979	n.a.
2020-06-09	LM64_VIII_py5	porphyry	pyrite		n.a.			518187	84446.5	15.8783	51.7246	12.831	0.0461011	120.103	42.2687	0.484728	3.78793	2.5558	0.521001	3.97069	3.93005	3.97069	n.a.			n.a.			n.a.			n.a.			4.55823	2.18907	0.346977	125.023	37.1309	2.12572	0.112384	0.067285	0.0263769	0.196013	0.126187	0.196013	n.a.
2020-06-09	LM64_VIII_py6	porphyry	pyrite		n.a.			477736	37870.8	19.258	260.561	161.167	0.0451586	874.929	449.419	0.419234	34.4329	19.9201	0.535459	2.56387	2.83302	2.56387	n.a.			n.a.			n.a.			n.a.			7.27252	3.38727	0.160359	114.566	50.3422	1.03294	0.309591	0.0963447	0.0278069	0.102286	0.110141	0.102286	n.a.
2020-06-09	LM64_VIII_py3	porphyry	pyrite		n.a.			500624	40237.2	13.1663	99.8626	54.7063	0.0398801	292.527	198.896	0.180437	4.07749	1.78776	1.31065	4.21926	1.45229	4.21926	n.a.			n.a.			n.a.			n.a.			10.2885	3.87688	0.652488	163.877	122.308	3.2787	0.801523	0.126445	0.0579127	0.276007	0.0909177	0.276007	n.a.
2020-06-09	LM64_VIII_py2	porphyry	pyrite		n.a.			467761	115557	34.2601	27.7511	0.409324	0.0730168	174.179	20.1046	0.529241	5.52585	3.50899	0.884715	143.81	292.095	5.68642	n.a.			n.a.			n.a.			n.a.			7.66771	1.41688	0.383437	92.6807	67.148	1.9286	0.292535	0.0181419	0.0494558	0.21039	0.14177	0.21039	n.a.
2020-06-09	LM64_IX_py1.3	porphyry	pyrite		n.a.			434376	36375.6	24.5451	17.0198	6.15648	0.0502939	69.3701	18.9464	0.412408	5.09552	1.14056	0.616677	7.92524	3.60213	7.92524	n.a.			n.a.			n.a.			n.a.			2.77782	0.487783	0.267903	164.472	59.353	2.13368	0.0593863	0.0195097	0.0593863	0.225132	0.163671	0.225132	n.a.
2020-06-09	LM64_IX_py1.4	porphyry	pyrite		n.a.			466825	31058.6	38.5265	32.606	12.0218	0.0414967	142.619	57.1139	0.471896	1.8355	0.512876	1.18032	2.75603	4.11866	2.75603	n.a.			n.a.			n.a.			n.a.			2.86329	1.18508	0.268337	440.194	60.5188	2.45434	0.0438277	0.0370031	0.0438277	0.315625	0.133599	0.315625	n.a.
2020-06-09	LM64_IX_py1.4	porphyry	pyrite		n.a.			474880	57534.3	17.7994	76.4332	19.7383	0.0510971	681.052	227.118	0.279928	306.983	302.558	0.753792	3.65262	3.926	3.65262	n.a.			n.a.			n.a.			n.a.			15.587	9.65587	0.27725	475.623	272.212	4.63292	0.0509643	0.033501	0.0509643	0.15123	0.118442	0.15123	n.a.
2020-06-09	LM64_X_py1	porphyry	pyrite		n.a.			474007	47326.8	24.6532	108.602	37.3505	0.0533666	279.195	68.48	0.393142	1.02986	0.613554	1.01044	5.44466	2.25197	5.44466	n.a.			n.a.			n.a.			n.a.			1.35443	0.840712	0.289072	173.18	19.4677	2.02496	0.0427408	0.0281876	0.0427408	0.164077	0.166693	0.164077	n.a.
2020-06-09	LM64_X_py6	porphyry	pyrite		n.a.			507164	47112.8	33.3838	120.475	29.8118	0.0394615	317.048	74.0286	0.357036	5.81776	3.10279	0.58936	3.69231	2.66884	3.69231	n.a.			n.a.			n.a.			n.a.			6.90318	2.08328	0.358814	175.028	49.0511	2.07529	0.236808	0.161253	0.0533095	0.186735	0.160662	0.151157	n.a.
2020-06-09	LM64_XII_py1	porphyry	pyrite		n.a.			459699	29164.9	17.9117	40.4528	6.80774	0.0504184	214.034	27.4126	0.28	6.54645	1.84548	0.616584	4.16528	1.43396	4.16528	n.a.			n.a.			n.a.			n.a.			8.30195	1.14495	0.18881	265.197	31.168	2.31455	1.11197	0.543089	0.0376828	0.175544	0.0734839	0.175544	n.a.
2020-06-09	LM64_XII_py3	porphyry	pyrite		n.a.			511028	63049.1	31.1654	59.4257	10.4496	0.0766448	216.19	51.5966	0.413827	11.4494	3.07257	1.19708	8.58957	5.6394	8.58957	n.a.			n.a.			n.a.			n.a.			10.4796	2.70395	0.571029	233.962	47.1887	2.4569	2.00881	1.90866	0.0535892	0.403591	0.229139	0.403591	n.a.
2020-12-02	LM-JB-14-01	epithermal	pyrite		15.363	1.42914	0.307321	486648	24169.1	6.97457	464.771	63.8974	0.0265675	225.042	167.902	0.178268	0.20656	0.143146	0.20656	1.14624	0.692368	1.14624	0.178532	0.117922	0.0545609	0.0918126	0.0924784	0.0577067	1.13971	0.483514	0.398031	0.708059	0.254891	0.164363	486.068	75.4391	0.181122	102.448	12.0514	1.14635	0.0226014	0.0146891	0.0226014	0.161239	0.0967831	0.161239	0.00560081	0.00982725	0.00503342
2020-12-02	LM-JB-14-02	epithermal	pyrite		17.2662	1.47038	0.287791	488510	36225.5	11.2635	166.98	22.6425	0.0274868	189.104	15.9192	0.318307	0.26693	0.175413	0.236188	0.822528	1.44903	0.822528	0.0293731	0.0529151	0.0293731	0.0291505	0.0269648	0.0291505	0.667588	0.287649	0.328379	0.94179	0.0709873	0.149687	393.597	39.1774	0.168173	115.454	16.9754	1.44247	0.0228226	0.0285981	0.0228226	0.244708	0.147491	0.244708	0.0124764	0.00616448	0.0124764
2020-12-02	LM-JB-14-03	epithermal	pyrite		15.6717	0.764181	0.274188	473360	42687.9	9.27544	191.45	11.29	0.0381965	986.566	79.973	0.17748	0.444257	0.808913	0.169988	1.18497	0.47276	1.18497	0.0447428	0.0143872	0.0447428	0.04515	0.015345	0.04515	1.09426	0.557854	0.301976	0.674315	0.0924542	0.182594	264.328	16.2094	0.233439	83.1332	8.95661	0.910431	0.02748	0.00993267	0.02748	0.196325	0.00968328	0.196325	0.00486062	0.00546111	0.00486062
2020-12-02	LM-JB-14-04	epithermal	pyrite		16.344	1.13121	0.170741	498146	41215.4	7.43384	78.7872	18.9506	0.0378123	359.505	83.2506	0.212234	0.229095	0.332934	0.229095	1.05829	0.831674	1.05829	0.0306737	0.0186397	0.0306737	0.0405099	0.0348977	0.0183936	0.616792	0.441826	0.317245	1.45175	0.24295	0.0806873	124.72	22.0373	0.151798	197.346	19.4047	0.935478	0.0256643	0.00928205	0.0256643	0.218194	0.131582	0.218194	0.0103321	0.00421236	0.0103321
2020-12-02	LM-JB-14-05	epithermal	pyrite		16.4772	1.18736	0.219823	473278	31302.9	8.52566	243.903	33.1122	0.0254347	644.729	85.3453	0.258086	0.161396	0.124486	0.161396	0.858597	0.826668	0.858597	0.0490142	0.038306	0.0490142	0.0271226	0.0304444	0.0271226	0.663774	0.276504	0.337842	0.5476	0.203206	0.186418	69.753	6.82622	0.130573	68.7859	4.7383	1.55958	0.0193333	0.0130054	0.0193333	0.18068	0.128758	0.18068	0.0098163	0.00400852	0.0098163
2020-12-02	LM-JB-14-06	epithermal	pyrite		15.1027	0.939709	0.262516	470046	15687.7	5.69035	160.464	34.4089	0.038365	529.872	118.084	0.285207	0.189663	0.135976	0.189663	0.923966	0.377323	0.923966	0.0481507	0.0153329	0.0481507	0.0337781	0.035914	0.0337781	0.78623	0.271689	0.295606	0.699446	0.144112	0.136452	531.878	171.876	0.160831	124.68	10.4802	2.08021	0.0333104	0.00221405	0.0333104	0.174393	0.0670724	0.174393	0.0102425	0.00468057	0.0102425
2020-12-02	LM-JB-14-07	epithermal	pyrite		15.6028	1.17259	0.41713	471273	33294.6	6.5981	268.118	76.3907	0.0299415	371.413	52.2594	0.255951	0.160274	0.101082	0.160274	1.32619	0.636958	1.32619	0.0316853	0.0125389	0.0316853	0.0454545	0.00260545	0.0454545	1.05296	0.801626	0.293921	0.413044	0.157124	0.115796	124.854	16.5798	0.22161	77.5292	8.77136	1.27597	0.0335333	0.0105687	0.0335333	0.131724	0.0732162	0.131724	0.00897537	0.00437558	0.00897537
2020-12-02	LM-JB-14-08	epithermal	pyrite		16.5756	1.40541	0.380455	494675	45422.7	10.6302	106.169	15.3229	0.0245588	495.43	68.6714	0.392461	0.204949	0.194619	0.175796	1.21385	0.779147	1.21385	0.0265183	0.0242793	0.0265183	0.0638089	0.00252606	0.0638089	0.882269	0.397706	0.367977	0.962618	0.32742	0.115958	761.448	91.5476	0.253841	153.577	25.2039	1.05423	0.0297225	0.0182336	0.0297225	0.190555	0.0760156	0.190555	0.00781273	0.0113266	0.00781273
2020-12-02	LM-JB-14-09	epithermal	pyrite		18.827	3.72104	0.217395	475663	18561.1	8.81037	481.22	142.708	0.0472569	1123.83	147.031	0.236245	2.95868	1.19324	0.117285	1.21289	0.398184	1.21289	0.0831583	0.122085	0.0710977	0.0679884	0.0526188	0.033511	1.03103	0.441623	0.23206	0.771521	0.284505	0.111607	252.578	44.1532	0.244351	109.676	12.2988	1.26503	1.59929	1.73759	0.0159476	0.180433	0.233017	0.159406	0.0101329	0.000355768	0.0101329
2020-12-02	LM-JB-14-10	epithermal	pyrite		16.2109	1.46328	0.280999	489418	50357.4	7.09524	841.037	181.757	0.0612619	765.882	202.795	0.375076	0.359749	0.349724	0.219918	0.846139	0.436509	0.846139	0.0385843	0.0212857	0.0385843	0.0526485	0.0314976	0.0526485	0.494654	0.514306	0.397594	0.587384	0.328597	0.148316	258.85	73.1957	0.189658	102.922	25.0667	1.31672	0.033437	0.0192615	0.033437	0.119729	0.128149	0.00332374	0.0129783	0.000142691	0.0129783
2020-12-02	LM-JB-14-11	epithermal	pyrite		20.0687	1.38253	0.264194	470879	28559.6	9.77912	57.1731	50.3336	0.0345373	1432.01	850.937	0.224167	24.455	6.07765	0.234834	2.30173	0.597467	1.3177	0.498395	0.11074	0.0540313	0.469266	0.239676	0.0722199	0.615202	0.491012	0.479731	0.257335	0.144804	0.17127	1829.02	877.488	0.150339	1.50585	0.498334	1.50585	4.55185	1.09277	0.031431	0.202435	0.0059166	0.202435	0.0113507	0.0106472	0.0055324
2020-12-02	LM-JB-14-12	epithermal	pyrite		29.185	10.5719	0.269735	466187	45973.7	7.28322	106.201	19.4909	0.0466515	273.548	45.3105	0.235505	0.271495	0.186411	0.224614	1.2884	0.880062	0.812671	0.61116	0.467585	0.041897	0.304428	0.208397	0.0602849	0.513764	0.369594	0.392342	0.770321	0.0721821	0.159854	370.286	48.2391	0.188881	97.4951	12.9176	1.01562	0.0306577	0.016242	0.0306577	0.0699619	0.0943864	0.00130832	0.0146058	0.00636134	0.0146058
2020-12-02	LM-JB-14-13	epithermal	pyrite		15.212	1.25855	0.154904	462792	32047.6	9.80397	60.1126	5.97571	0.0244646	426.359	26.8958	0.218912	14.1226	2.69409	0.190854	1.00605	0.92076	1.00605	0.0393956	0.0023327	0.0393956	0.0349239	0.014567	0.0349239	0.83199	0.648438	0.468408	0.20238	0.170958	0.163033	3291.2	765.135	0.224913	34.7513	11.121	1.26937	1.79174	0.351769	0.0194751	0.112864	0.136686	0.112864	0.00658326	0.00367089	0.00658326
2020-12-02	LM-JB-14-14	epithermal	pyrite		15.8027	0.982511	0.228525	449750	40912	7.98297	55.1189	4.76186	0.0267876	125.658	26.4866	0.373606	0.211276	0.0690527	0.211276	1.4116	0.680955	1.4116	0.0349999	0.0240367	0.0349999	0.0329043	0.0360097	0.0329043	1.17325	0.728253	0.483258	0.852234	0.151504	0.202957	326.854	31.9469	0.222805	130.507	11.8163	1.59224	0.0172815	0.0197268	0.0172815	0.13708	0.0749306	0.13708	0.00686197	0.000144042	0.00686197
2020-06-09	LM29_I_py_1.1	epithermal	pyrite		n.a.			461315	41430.9	14.0054	12.5003	3.47542	0.0332581	126.578	42.2706	0.373262	166.466	31.3138	0.453385	71.5351	64.1264	3.41247	n.a.			n.a.			n.a.			n.a.			2.94925	1.71578	0.2465	64.6585	12.1599	2.529	8.93745	7.84569	0.0585221	0.303009	0.0915043	0.303009	n.a.
2020-06-09	LM29_I_py_1.2	epithermal	pyrite		n.a.			504089	188169	41.2524	7.98322	3.98648	0.135691	184.431	56.4939	0.803809	75.1961	19.338	1.14921	36.9151	47.1235	14.3893	n.a.			n.a.			n.a.			n.a.			31.4341	28.4109	0.927719	104.723	53.8511	4.04226	10.7201	6.9081	0.0670077	0.46208	0.766813	0.46208	n.a.
2020-06-09	LM29_I_py_1.3	epithermal	pyrite		n.a.			526525	42415.2	13.7223	213.791	36.1849	0.036138	1796.72	324.102	0.270166	1189.87	367.831	0.659413	2.19045	1.95783	2.19045	n.a.			n.a.			n.a.			n.a.			30.6634	5.68643	0.205525	11.9654	4.64575	1.07983	13.6219	4.91452	0.0288953	0.124575	0.0422306	0.124575	n.a.
2020-06-09	LM29_I_py_1.6	epithermal	pyrite		n.a.			447951	50020.5	14.3631	65.7652	8.15076	0.0397278	563.114	45.8075	0.338472	63.1298	78.0988	0.569697	3.38182	3.22529	3.38182	n.a.			n.a.			n.a.			n.a.			212.895	43.8541	0.269305	6.21274	1.34459	1.36605	3.55125	2.66578	0.0280593	0.161408	0.176001	0.155121	n.a.
2020-06-09	LM29_I_py_3	epithermal	pyrite		n.a.			448107	55142.7	17.6686	0.0956869	0.0381616	0.0453679	56.4668	15.108	0.322825	2.46589	0.66343	0.475495	3.20335	3.33788	3.20335	n.a.			n.a.			n.a.			n.a.			0.320004	0.152037	0.320004	38.5335	4.42989	1.78857	0.0245091	0.0157163	0.0245091	0.269203	0.0495744	0.269203	n.a.
2020-06-09	LM29_I_py_5	epithermal	pyrite		n.a.			471460	57890.6	19.3235	0.0366508	0.0117832	0.0366508	2.75697	1.57835	0.243241	1019.03	116.396	0.527846	3.36799	2.05785	3.36799	n.a.			n.a.			n.a.			n.a.			0.210904	0.223611	0.210904	48.3467	9.89915	1.7927	0.423363	0.4831	0.0404432	0.198505	0.0416971	0.198505	n.a.
2020-06-09	LM29_I_py_2	epithermal	pyrite		n.a.			453406	43050	11.4049	0.0410502	0.0358965	0.0285563	10.741	6.66158	0.279787	534.093	90.369	0.483556	4.56609	1.18073	4.56609	n.a.			n.a.			n.a.			n.a.			0.251869	0.180705	0.176401	2.90687	1.77202	1.72433	2.38826	1.54641	0.0349436	0.087807	0.0594618	0.087807	n.a.
2020-06-09	LM29_III_py_1	epithermal	pyrite		n.a.			459134	62379.3	23.1474	1810.57	1349.94	0.0416695	5996.31	3829.7	0.49189	662.104	119.774	0.782229	13.9102	8.71369	3.47942	n.a.			n.a.			n.a.			n.a.			52.0134	26.9047	0.277477	44.6732	34.6044	1.77057	36.9058	17.4875	0.0273663	0.100222	0.116265	0.100222	n.a.
2020-06-09	LM29_III_py_2	epithermal	pyrite		n.a.			447497	46638	14.7267	0.156828	0.0610358	0.0409448	0.755956	0.490969	0.188218	630.187	104.771	0.519343	3.41661	1.66265	3.41661	n.a.			n.a.			n.a.			n.a.			0.231621	0.235504	0.231621	27.2086	8.46707	2.11708	0.044345	0.0238349	0.044345	0.137725	0.13087	0.137725	n.a.
2020-06-09	LM29_III_py_4	epithermal	pyrite		n.a.			428116	63573.8	14.8258	1.4497	0.852399	0.0526024	6.44191	1.68824	0.349684	485.726	154.85	0.569238	4.2671	1.56376	4.2671	n.a.			n.a.			n.a.			n.a.			0.375403	0.276151	0.192634	5.29023	1.05337	1.38318	1.34184	0.558777	0.0362904	0.118331	0.150247	0.10133	n.a.
2020-06-09	LM29_III_py_5	epithermal	pyrite		n.a.			451763	48204.9	11.677	0.0480007	0.0181712	0.0480007	1.1914	0.4104	0.295667	1259.71	238.861	0.477878	2.64921	4.19465	2.64921	n.a.			n.a.			n.a.			n.a.			0.293174	0.160638	0.293174	265.772	43.1365	1.91148	0.0270243	0.0294351	0.0270243	0.187995	0.0990918	0.187995	n.a.
2020-06-09	LM29_V_py_1.1	epithermal	pyrite		n.a.			439050	61785.2	19.7785	9.75783	3.22608	0.0388708	62.7045	16.3803	0.272507	1105.6	532.312	0.541063	3.68517	2.28992	3.68517	n.a.			n.a.			n.a.			n.a.			0.544063	0.367758	0.476369	66.1025	12.0158	1.94113	1.22327	0.665883	0.0273527	0.261382	0.0512195	0.261382	n.a.
2020-06-09	LM29_V_py_1.2	epithermal	pyrite		n.a.			427826	55326.4	18.548	2.16113	1.86308	0.0427707	3.34678	1.49718	0.204957	360.019	239.45	0.564511	3.81323	2.04899	3.81323	n.a.			n.a.			n.a.			n.a.			0.33085	0.205152	0.33085	13.631	8.31706	1.63431	0.041032	0.0380405	0.041032	0.203059	0.153599	0.203059	n.a.
2020-06-09	LM29_V_py_1.3	epithermal	pyrite		n.a.			446561	45021.5	15.8775	0.0753178	0.021163	0.0322717	20.686	11.5779	0.297297	1368.91	310.443	0.558151	2.70659	1.33648	2.70659	n.a.			n.a.			n.a.			n.a.			1.08275	0.558738	0.325306	15.3788	8.7112	2.62747	14.6518	8.64	0.0248029	0.182025	0.203119	0.128928	n.a.
2020-06-09	LM29_VII_py_1	epithermal	pyrite		n.a.			434357	51234.5	13.7022	0.40564	0.122537	0.0351005	26.9351	7.01631	0.178903	1632.08	270.693	0.347994	2.53976	2.15027	2.23242	n.a.			n.a.			n.a.			n.a.			0.630644	0.308482	0.278086	81.9611	46.082	1.61431	2.33769	0.635167	0.0209369	0.102297	0.0719247	0.102297	n.a.
2020-06-09	LM29_VII_py_3	epithermal	pyrite		n.a.			461855	74725.6	15.5411	52.6443	9.32566	0.0271932	329.646	118.524	0.217877	5890.66	989.595	0.425322	4.68937	3.9188	3.13845	n.a.			n.a.			n.a.			n.a.			18.1802	11.9251	0.206252	160.253	21.4987	2.20135	16.9692	4.31395	0.0251029	0.0950162	0.094333	0.0950162	n.a.
2020-06-09	LM29_IX_py_1.1	epithermal	pyrite		n.a.			444279	36444.8	16.1613	0.0496106	0.0342672	0.0496106	0.27145	0.230175	0.27145	123.258	10.1866	0.595839	2.3296	1.82242	2.3296	n.a.			n.a.			n.a.			n.a.			0.222411	0.222789	0.222411	2.32393	1.80383	1.25392	0.02502	0.0181189	0.02502	0.158458	0.115199	0.158458	n.a.
2020-06-09	LM29_IX_py_1.2	epithermal	pyrite		n.a.			472948	33293.5	34.7449	1.74709	0.272674	0.0443378	9.73049	1.3381	0.402404	521.26	62.6911	0.589829	3.58167	1.69082	3.58167	n.a.			n.a.			n.a.			n.a.			0.307973	0.185444	0.307973	90.0213	10.5301	2.05757	0.0351734	0.0251928	0.0351734	0.165296	0.0848011	0.165296	n.a.
2020-06-09	LM29_IX_py_1.3	epithermal	pyrite		n.a.			422973	20966.1	17.4311	30.0258	19.219	0.0319315	71.9007	41.7898	0.173377	603.452	110.766	0.401219	2.38203	2.29562	2.38203	n.a.			n.a.			n.a.			n.a.			47.1684	45.8555	0.199932	59.8794	12.076	2.11376	0.090913	0.0572342	0.0283825	0.0953318	0.128355	0.0838799	n.a.
2020-06-09	LM29_X_py_1	epithermal	pyrite		n.a.			423216	62725.2	22.6312	0.0488194	0.0257848	0.0473765	1.24677	0.490461	0.196811	562.995	81.2189	0.550294	2.17229	1.09665	2.17229	n.a.			n.a.			n.a.			n.a.			0.174603	0.128862	0.174603	3.9776	1.79113	0.717488	0.067707	0.118378	0.028194	0.16325	0.0646155	0.16325	n.a.
2020-06-09	LM29_X_py_2	epithermal	pyrite		n.a.			385683	49403.3	15.5517	0.0309652	0.0192324	0.0309652	7.35443	5.24799	0.224407	584.144	113.823	0.505574	3.00584	2.42201	3.00584	n.a.			n.a.			n.a.			n.a.			0.490365	0.308249	0.259081	4.21975	2.25512	1.08579	0.898126	0.809023	0.0228627	0.108445	0.0338156	0.108445	n.a.
2020-06-09	LM29_XI_py_6	epithermal	pyrite		n.a.			350756	60692.1	14.4483	0.0573237	0.0864739	0.0265451	3.77514	2.76146	0.195457	881.812	174.689	0.518369	3.447	1.63912	3.447	n.a.			n.a.			n.a.			n.a.			0.207927	0.0929265	0.207927	163.733	32.2559	1.66943	0.411431	0.371418	0.0333575	0.182593	0.0597582	0.182593	n.a.
2020-06-09	LM29_XI_py_8	epithermal	pyrite		n.a.			362964	37369.9	14.6882	85.9647	22.3492	0.0213262	200.371	34.8538	0.246191	599.414	93.8949	0.33672	3.61377	1.72593	3.61377	n.a.			n.a.			n.a.			n.a.			3.3519	2.38787	0.228434	38.9861	5.36561	0.623281	1.47829	1.15019	0.0257841	0.110061	0.0931727	0.110061	n.a.
2020-12-02	LM-JB-6a-01	epithermal	pyrite		23.4568	2.10177	0.516951	543004	51960	12.8465	4.03531	4.16359	0.052073	269.775	212.715	0.628236	167.734	38.5808	0.324543	1.97522	0.0507804	1.97522	0.0507804	0.0608929	0.0507804	0.0712794	0.106186	0.0418865	0.896111	0.421225	0.717021	0.436374	0.143739	0.206244	17598.3	2079.44	0.453755	5.48364	1.37126	1.86824	9.84708	1.87085	0.0418582	0.216102	0.00356364	0.216102	0.0210186	0.0104247	0.0131252
2020-12-02	LM-JB-6A-02	epithermal	pyrite		21.6916	1.75521	0.368208	543829	24841.1	10.5164	18.5059	11.392	0.0386488	1482.43	852.782	0.443952	167.845	62.4791	0.405929	1.23862	0.571501	1.23862	0.0477013	0.0271539	0.0477013	0.0840511	0.001907	0.0840511	0.606441	0.378123	0.606441	0.200265	0.193906	0.200265	14254.8	2320.06	0.352984	4.65439	2.05014	2.21058	8.84828	2.02975	0.0328458	0.296109	0.00572581	0.296109	0.0154428	0.000241109	0.0154428
2020-12-02	LM-JB-6A-03	epithermal	pyrite		45.6612	28.5846	0.468027	552486	49624.5	8.34495	4.69481	1.88628	0.0718314	504.594	228.607	0.369954	164.692	28.9822	0.347109	1.63542	1.5997	1.63542	0.0650203	0.0492054	0.0650203	0.0440515	0.0373395	0.0440515	1.42095	0.751502	0.634816	0.354393	0.262426	0.20339	27952.5	2613.22	0.253713	3.92012	2.25035	2.00987	2.64768	1.23799	0.0260399	0.274988	0.00471148	0.274988	0.0105829	0.000210262	0.0105829
2020-12-02	LM-JB-6A-04	epithermal	pyrite		22.3517	0.546474	0.524307	525431	57743.1	11.3408	122.019	8.20886	0.0513104	683.733	64.2707	0.511272	1.8665	0.864947	0.28444	1.42593	0.0477474	1.42593	0.0673284	0.0739797	0.0673284	0.0795829	0.113657	0.0795829	1.19667	1.75526	1.19667	0.471845	0.243667	0.471845	948.332	136.76	0.436895	41.4231	9.7541	2.23201	0.0421799	0.00138283	0.0421799	0.152585	0.00253756	0.152585	0.0114424	0.0147324	0.0114424
2020-12-02	LM-JB-6A-05	epithermal	pyrite		28.7631	4.80659	0.330519	478526	29223.3	7.26857	91.348	58.5293	0.0720823	536.628	292.326	0.357503	30.7153	11.6023	0.274319	10.2626	16.8229	1.45835	0.556364	0.35375	0.0334385	0.136753	0.112129	0.0347497	0.558773	0.754099	0.32695	0.245684	0.170405	0.212404	7839.08	4238.52	0.388585	19.1686	5.03715	1.26225	0.337243	0.125093	0.0429551	0.151909	0.116703	0.151909	0.0083797	0.00629723	0.0083797
2020-12-02	LM-JB-6A-06	epithermal	pyrite		18.6309	1.39646	0.306453	472834	19627.7	8.15009	29.2701	11.3615	0.0423069	79.7154	18.9369	0.449816	54.8463	4.78445	0.282036	1.16638	0.933112	1.16638	0.0580168	0.0353068	0.0580168	0.0527798	0.00201785	0.0527798	0.540928	0.549303	0.540928	0.434819	0.262494	0.137544	13083.4	612.996	0.444441	17.5978	3.54627	2.37631	0.395791	0.0793395	0.0387772	0.100676	0.0755644	0.100676	0.00555578	0.00516362	0.00555578
2020-12-02	LM-JB-6A-07	epithermal	pyrite		20.4585	2.18781	0.303912	530227	19404.9	8.52944	0.0842752	0.0410577	0.0842752	3.97043	1.90388	0.247617	10.3977	0.314922	0.268429	2.32988	0.498384	2.32988	0.0527005	0.0717086	0.0527005	0.0441944	0.0703651	0.0441944	0.869609	0.300356	0.869609	0.23053	0.0734416	0.23053	0.464819	0.110074	0.464819	2.46861	2.57458	2.46861	0.0663334	0.0253901	0.0663334	0.283544	0.302149	0.283544	0.0109178	0.0147359	0.0088483
2020-12-02	LM-JB-6A-08	epithermal	pyrite		20.255	2.469	0.293879	542170	44240.5	9.25284	0.0459432	0.0578112	0.0459432	5.84141	1.4315	0.320401	17.2178	2.6292	0.347905	1.77402	0.012208	1.77402	0.0610279	0.00507842	0.0610279	0.0775635	0.0373249	0.0775635	0.412478	0.781764	0.412478	0.192071	0.139651	0.192071	0.410482	0.198423	0.410482	2.62886	2.51705	1.94776	0.0453196	0.0256711	0.0453196	0.120992	0.158737	0.120992	0.0159844	0.000708381	0.0159844
2020-12-02	LM-JB-6A-09	epithermal	pyrite		21.8327	1.44064	0.402409	539905	37128.3	9.13068	0.0499147	0.032293	0.0499147	0.704976	1.39476	0.704976	6.29098	2.05323	0.297379	2.11962	0.164773	2.11962	0.0734674	0.034617	0.0734674	0.0424806	0.000739765	0.0424806	1.13335	0.706198	0.692422	0.246144	0.00199976	0.246144	0.725606	0.171348	0.725606	2.57563	0.870887	2.57563	0.153212	0.0513851	0.0507311	0.299383	0.00617018	0.299383	0.0120357	0.000387339	0.0120357
2020-12-02	LM-JB-6A-12	epithermal	pyrite		67.0304	24.7427	0.353589	488150	39669.5	10.0028	14.517	5.84528	0.0511664	54.7696	27.2496	0.434712	15.4269	13.3975	0.332559	5.14547	6.33882	1.68643	0.487224	0.420765	0.115378	0.387869	0.310348	0.0651752	0.574426	0.43188	0.574426	0.22341	0.213554	0.16006	27.1709	4.66721	0.437606	26.5489	7.17687	1.56445	0.683794	0.290732	0.0430731	0.0931174	0.127095	0.00236199	0.0106508	0.00747365	0.0106508
2020-12-02	LM-JB-6A-13	epithermal	pyrite		38.257	13.1261	0.469747	465754	36461.2	6.87612	69.6854	15.203	0.0405619	494.714	67.2785	0.344006	9.58577	5.1853	0.187083	71.4517	71.0288	1.22399	0.119669	0.0872788	0.0394572	0.145245	0.155347	0.0327253	0.607741	0.331902	0.329482	0.162112	0.150736	0.162112	89.4461	21.3203	0.321448	6.02433	3.43333	1.82104	0.41091	0.358485	0.0306379	0.307491	0.307768	0.103716	0.00793324	0.0090757	0.00793324
2020-12-02	LM-JB-6A-14	epithermal	pyrite		48.6585	18.8006	0.224986	455972	35274.2	8.61428	345.718	145.625	0.0249671	830.375	215.239	0.293149	5.92838	4.58403	0.322421	3.68312	2.5125	1.59379	0.620045	0.342576	0.0841861	0.667689	0.308448	0.0584826	0.547721	0.457618	0.547721	0.288739	0.113937	0.288739	990.867	670.42	0.464232	51.8065	15.236	2.39635	0.336124	0.175921	0.0398221	0.352249	0.095296	0.352249	0.0141612	0.0131384	0.0141612
2020-12-02	LM-JB-6A-15	epithermal	pyrite		38.8753	21.3322	0.325752	502154	47085.3	14.0952	288.129	6.59555	0.0603385	972.715	146.737	0.308907	1.67323	1.8271	0.251399	4.35084	4.09309	1.38018	0.0908903	0.0367544	0.0908903	0.0966528	0.0573048	0.0966528	0.808927	1.02929	0.808927	0.306776	0.0847349	0.300327	137.405	91.9513	0.380111	44.9226	2.72975	1.90805	0.225461	0.434624	0.0604069	0.269056	0.00232484	0.269056	0.0100927	0.0241271	0.0100927
2020-12-02	LM-JB-6A-16	epithermal	pyrite		64.1256	65.3536	0.40321	509907	12779.2	9.75098	50.7119	4.57158	0.0477304	930.321	158.808	0.391004	29.2573	18.6755	0.330884	89.9518	97.0615	1.21675	0.194236	0.081679	0.0591161	0.310883	0.445386	0.111	0.628438	0.564404	0.628438	0.33344	0.366024	0.22922	453.193	5.32728	0.502996	41.8671	4.32741	1.98382	5.6313	0.656742	0.0475868	0.221106	0.470977	0.00669107	0.0272496	0.0137959	0.0272496
2020-12-02	LM-JB-6A-17	epithermal	pyrite		35.7954	16.9234	0.289019	448311	28612	8.84527	84.1995	8.84997	0.0499485	576.952	131.129	0.279668	1.09162	0.339101	0.293367	1.3331	0.94595	1.3331	0.054759	0.0532215	0.054759	0.0578366	0.0682897	0.0404518	0.593472	0.621966	0.593472	0.492732	0.407056	0.19988	266.007	104.125	0.299717	37.7778	17.4546	2.05672	0.060692	0.0673253	0.060692	0.255296	0.125602	0.255296	0.0140085	0.0182085	0.00976046
2020-12-02	LM-JB-6A-18	epithermal	pyrite		28.8296	18.8654	0.284289	466355	41158.8	10.0791	49.6802	10.46	0.0702799	247.23	75.3767	0.394301	147.356	78.8035	0.231128	1.88802	1.16986	1.88802	0.0679306	0.0936908	0.0679306	0.0647865	0.0288885	0.0647865	1.2935	0.738242	0.503015	0.551858	0.165743	0.203745	435.855	193.561	0.323224	79.4594	9.96106	1.36966	367.7	710.689	0.0429942	0.293602	0.10627	0.116914	0.0180068	0.0132873	0.0180068
2020-12-02	LM-JB-7A-04	epithermal	pyrite		18.8504	1.53282	0.293101	464009	34208.1	10.6933	19.6651	7.53629	0.041741	40.3854	14.5934	0.247027	404.622	111.608	0.304787	31.3706	32.7266	1.07912	0.19096	0.00984554	0.0585152	0.20647	0.0871731	0.079064	0.815863	0.478705	0.409976	0.21653	0.173453	0.21653	662.048	422.399	0.367582	4.06986	2.69699	1.44372	14.4986	7.53624	0.0374191	1.26265	2.02702	0.216555	0.284365	0.173796	0.0143196
2020-12-02	LM-JB-7A-05	epithermal	pyrite		16.6767	1.69232	0.265963	441734	29189.8	9.14509	9.42466	3.29649	0.027264	28.9226	14.7318	0.373262	1303.1	545.16	0.230883	59.5106	27.3883	1.11197	1.06356	0.906648	0.0557569	0.890243	0.437044	0.0644675	0.889554	1.06665	0.467045	0.569091	0.167115	0.143355	123.9	66.8172	0.346782	2.88333	1.76493	2.35447	11.8513	1.84908	0.0486576	3.55254	2.59534	0.229692	0.484788	0.139071	0.00563799
2020-12-02	LM-JB-7A-06	epithermal	pyrite		30.0315	16.5501	0.277982	463372	25777.8	7.35748	55.0666	12.3787	0.0306238	284.039	21.0567	0.331137	54.9884	31.1567	0.325717	4.47829	8.83906	0.989942	0.0500808	0.0261754	0.0500808	0.0519487	0.0243968	0.0519487	0.787574	0.243367	0.787574	0.186388	0.168399	0.186388	342.284	212.559	0.352241	6.87595	4.76321	1.95477	9.3249	9.02375	0.000901498	0.329351	0.695144	0.323471	0.0182966	0.00997498	0.0182966
2020-12-02	LM-JB-7A-07	epithermal	pyrite		112.629	55.2687	0.233161	464496	31370	8.43603	69.1906	25.7944	0.0495433	245.043	112.243	0.509548	20.8419	17.8038	0.267043	2.11453	1.85493	1.09773	0.175021	0.215032	0.0382903	0.0908044	0.118522	0.0328505	0.804715	0.287408	0.804715	0.158927	0.17256	0.126472	540.289	550.907	0.314773	4.61163	3.33103	2.70016	9.05188	12.2547	0.0393547	0.231671	0.133126	0.231671	0.0128835	0.0103358	0.0128835
2020-12-02	LM-JB-7A-13	epithermal	pyrite		32.0837	13.6871	0.290354	415108	41089.5	8.98439	2.88091	1.08214	0.0532517	18.3541	6.25786	0.295027	41.7762	65.9525	0.249942	1.47131	1.10326	1.47131	0.0769639	0.0544352	0.0769639	0.0411633	0.0265904	0.0411633	0.545971	0.553485	0.328585	0.207849	0.111196	0.14663	32.8485	8.60312	0.218602	3.26039	1.31466	1.95792	4.29353	3.2799	0.000718389	0.23339	0.117237	0.23339	0.010509	0.0102623	0.010509
2020-12-02	LM-JB-7A-14	epithermal	pyrite		36.4403	15.3526	0.260346	443418	22797.3	6.6743	6.20899	3.82265	0.0331353	16.3027	7.81789	0.257467	1.5715	0.4094	0.230059	1.14408	0.628825	1.14408	0.0512826	0.0435129	0.0372579	0.0411028	0.056571	0.0411028	0.625374	0.467946	0.625374	0.156575	0.111102	0.156575	16.8899	13.0095	0.172327	4.13914	1.55142	1.55992	0.341008	0.162256	0.0275008	0.137853	0.168439	0.137853	0.0183466	0.00486049	0.0183466
2020-12-02	LM-JB-7A-15	epithermal	pyrite		36.5749	8.79601	0.24706	424669	36999.7	7.49314	12.9655	13.515	0.0387576	33.8078	45.7214	0.271444	2.21086	0.522815	0.3269	1.52328	0.741301	1.52328	0.0555403	0.015839	0.0555403	0.0386495	0.0219422	0.0386495	0.748629	0.637947	0.748629	0.134709	0.0994496	0.134709	142.628	108.652	0.279752	4.2867	3.07007	1.39221	0.498296	0.304075	0.0456832	0.21152	0.18756	0.21152	0.0110315	0.000541811	0.0110315
2020-12-02	LM-JB-7A-16	epithermal	pyrite		23.0797	6.38664	0.228087	412710	28441.5	8.48712	13.2951	10.728	0.0395201	31.8981	14.5336	0.299205	10.512	3.84131	0.209792	1.03325	0.786548	1.03325	0.042821	0.0316231	0.042821	0.0537868	0.0372749	0.0537868	0.400725	0.276734	0.372619	0.11866	0.091236	0.11866	69.239	38.2575	0.225402	4.50366	2.37705	1.50014	1.00722	0.390879	0.0295574	0.155789	0.0922658	0.155789	0.00962671	0.00376835	0.00962671
2020-12-02	LM-JB-7A-17	epithermal	pyrite		52.534	14.8762	0.270922	431039	26295.4	4.48811	83.5753	29.91	0.0695569	292.159	93.5525	0.311575	15.194	5.91712	0.210681	1.73269	1.54642	1.73269	0.055224	0.0605933	0.055224	0.088254	0.128911	0.0381508	0.521112	0.653968	0.481581	0.170113	0.12428	0.170113	52.2252	23.917	0.247155	5.7876	2.50059	1.40282	24.7011	7.05275	0.0304685	0.183299	0.097093	0.183299	0.00587727	0.00483338	0.00587727
2020-12-02	LM-JB-7A-21	epithermal	pyrite		116.147	28.2525	0.304215	398259	15086.8	7.53113	81.7884	9.98839	0.0379819	363.001	90.0753	0.315993	22.0291	2.87414	0.258112	2.1962	1.22423	1.47905	0.470718	0.213508	0.0394547	0.303669	0.147397	0.0422767	0.46539	0.414794	0.46539	0.165448	0.102779	0.165448	508.357	212.195	0.243808	9.19799	2.34528	1.69997	4.30356	1.12778	0.0445209	0.298765	0.214214	0.298765	0.00807472	0.00467865	0.00807472
2020-12-02	LM-JB-7A-22	epithermal	pyrite		28.8235	8.51136	0.309365	423640	29131.3	10.8354	79.6795	38.8432	0.0366924	220.604	87.4851	0.450049	5.39882	0.979104	0.321141	2.02776	2.82188	2.02776	1.00172	0.804556	0.0685181	0.0550534	0.0437885	0.0550534	0.722477	0.227255	0.722477	0.215394	0.0633147	0.215394	26.0514	7.00338	0.3789	10.7823	7.63507	1.72977	1.69893	0.910818	0.0614256	0.176053	0.204409	0.176053	0.0140744	0.000399946	0.0140744
2020-12-02	LM-JB-7A-23	epithermal	pyrite		54.2087	41.3996	0.242619	414229	58433.7	9.49867	2.70812	1.85113	0.051234	9.42945	4.65586	0.323615	6.55827	0.931347	0.291216	2.09456	1.0922	2.09456	0.0905524	0.0677117	0.0905524	0.0715558	0.0740845	0.0715558	0.706615	0.473589	0.706615	0.130233	0.0954393	0.130233	49.6543	76.5826	0.348905	3.06466	2.04638	2.18254	7.32934	1.16641	0.0331825	0.155611	0.160278	0.155611	0.00743234	0.000184265	0.00743234
2020-12-02	LM-JB-7A-24	epithermal	pyrite		54.9668	61.6486	0.281467	400211	37621.7	6.45113	57.235	67.8087	0.0574675	83.2807	109.826	0.255961	3.33828	2.75427	0.190609	2190.55	2822.48	0.860295	0.117689	0.184538	0.0459892	0.12716	0.161316	0.0460963	0.622201	0.297777	0.622201	0.138785	0.0716533	0.138785	364.416	120.323	0.203977	3.74245	2.43795	2.11677	1.53028	2.1921	0.0139149	29.6802	37.696	0.126231	0.0616557	0.0890841	0.0113251
2020-12-02	LM-JB-7d-01	epithermal	pyrite		151.667	49.8003	0.473917	504971	40641.1	12.6592	8.83998	15.3686	0.0743213	294.581	484.31	0.420435	6.60214	4.55239	0.542372	5.54944	3.96928	2.09246	0.142765	0.126694	0.0784697	0.173735	0.116916	0.0954555	1.16957	0.844343	1.16957	0.245569	0.112149	0.245569	1274.02	643.15	0.386768	14.165	6.40835	2.61013	2.67911	3.17393	0.0599115	0.398911	0.222879	0.398911	0.00964521	0.0005944	0.00964521
2020-12-02	LM-JB-7D-03	epithermal	pyrite		17.0044	1.0064	0.377717	497841	50841.1	14.2223	37.2448	12.9958	0.0738228	0.532336	0.246463	0.532336	0.605117	0.22131	0.237036	1.88323	1.00035	1.88323	0.0512659	0.0194479	0.0512659	0.0355089	0.0503593	0.0355089	0.636875	0.485307	0.636875	0.736419	0.25114	0.126839	0.279835	0.13831	0.279835	141.195	30.4479	1.51298	0.027959	0.0241756	0.027959	0.221633	0.0600615	0.221633	0.00996281	0.0114226	0.00996281
2020-12-02	LM-JB-7D-04	epithermal	pyrite		15.9809	1.45008	0.380885	502946	22597.6	7.03693	1861.28	282.394	0.0451413	11.4481	1.76228	0.288397	25.2511	5.18248	0.201295	1.13682	0.5567	1.13682	0.0614599	0.0356671	0.0614599	0.0543674	0.0175301	0.0543674	0.456839	0.537906	0.451928	1.61683	0.321367	0.139852	26.581	4.98427	0.195692	239.059	10.6336	1.44589	0.0169296	0.0138536	0.0169296	0.244918	0.060259	0.244918	0.0130268	0.00641778	0.0130268
2020-12-02	LM-JB-7D-05	epithermal	pyrite		15.6464	1.54106	0.292656	473950	31631.6	7.92142	26.4474	2.47268	0.07096	0.519694	0.377401	0.368972	179.615	28.3878	0.386497	0.921575	0.887966	0.921575	0.0547952	0.0187613	0.0547952	0.072696	0.0350519	0.072696	0.509129	0.582213	0.509129	1.17883	0.279996	0.154291	60.3651	8.21455	0.227785	181.446	11.9465	1.73162	0.0299258	0.0216955	0.0299258	0.304397	0.0991052	0.304397	0.00611455	0.00677191	0.00611455
2020-12-02	LM-JB-7D-06	epithermal	pyrite		19.0799	3.66	0.266142	490259	34729.9	11.5222	83.2054	9.15643	0.057799	5.04596	1.43263	0.408027	122.694	67.1268	0.226368	32.4112	15.6842	1.45741	0.0493152	0.0295621	0.0493152	0.0555446	0.0450567	0.0555446	0.676497	0.437849	0.676497	0.370379	0.148047	0.164324	44.7674	17.7719	0.188732	79.304	7.51228	2.30231	0.381132	0.35702	0.017295	0.971102	0.638978	0.00803251	0.0602487	0.0268985	0.0121627
2020-12-02	LM-JB-7D-08	epithermal	pyrite		17.0781	1.31601	0.277243	523908	40557.2	10.3174	1.88929	1.34594	0.0583445	2.5355	1.01884	0.258657	7562.72	8184.62	0.248949	1.17421	1.54235	0.861417	0.0679269	0.0376835	0.0679269	0.0583167	0.0394012	0.0583167	0.541719	0.294785	0.322853	3.14558	0.443562	0.126531	0.680833	0.749606	0.243399	559.738	48.7245	1.61107	7.2366	7.32905	0.0370756	0.24116	0.180238	0.24116	1.05158	0.813061	0.0175135
2020-12-02	LM-JB-7D-09	epithermal	pyrite		17.163	1.25069	0.39528	513283	50036.4	6.7148	5.60766	1.29727	0.071674	29.1954	8.37378	0.387196	142.424	58.7107	0.164672	1.1879	1.56293	1.1879	0.0549899	0.0174189	0.0549899	0.0541453	0.0579466	0.0541453	0.45871	0.346177	0.45871	2.69155	0.522813	0.190079	5.70166	3.79306	0.2481	430.659	78.1443	3.02999	0.453504	0.40972	0.0300878	0.219426	0.280531	0.219426	0.0178526	0.0156166	0.00993157
2020-12-02	LM-JB-7D-12	epithermal	pyrite		17.6376	0.825376	0.225855	511409	26893.4	5.22854	5.57604	0.783941	0.0379114	0.375165	0.274613	0.375165	5.99276	1.99859	0.280303	1.57185	0.877712	1.57185	0.0610153	0.026122	0.0610153	0.0326287	0.0169038	0.0326287	0.694019	0.590151	0.571213	0.547637	0.176257	0.146999	0.294947	0.136089	0.294947	84.3199	7.72587	2.14295	0.0161357	0.0163706	0.0161357	0.142443	0.0713064	0.142443	0.00783223	0.00954065	0.00783223
2020-12-02	LM-JB-7D-13	epithermal	pyrite		16.0561	1.43792	0.302595	521135	47103.7	9.41671	7.53798	1.55122	0.0553106	3.30376	0.529317	0.404601	2.75897	1.2281	0.216971	1.22713	0.628656	1.22713	0.031809	0.0175645	0.031809	0.0930753	0.0252491	0.0930753	0.603997	0.346339	0.544781	2.42159	0.389021	0.159556	0.304141	0.114011	0.304141	393.839	88.7679	1.65137	0.0391414	0.0269012	0.0391414	0.28558	0.0661937	0.28558	0.00904961	0.00559566	0.00904961
2020-12-02	LM-JB-7D-14	epithermal	pyrite		16.7659	1.12007	0.270057	494215	41676.1	13.5568	0.573944	1.14373	0.042238	1.02883	2.21809	0.300083	1059.02	111.111	0.273649	1.35781	0.488521	1.35781	0.0508209	0.0264953	0.0508209	0.0636622	0.0240202	0.0636622	0.620934	0.642687	0.497774	0.708441	0.151244	0.203932	0.271448	0.135322	0.271448	136.352	14.8697	1.46214	0.139982	0.258095	0.0211463	0.154562	0.105821	0.154562	0.0977508	0.183242	0.00736408
2020-12-02	LM-JB-7D-15	epithermal	pyrite		16.8482	1.13008	0.270093	521495	31889.3	6.57536	1.0809	0.522077	0.0413153	2.12995	0.796455	0.466632	2508.18	3551.05	0.226392	2.17019	2.2801	0.867	0.0532435	0.0292485	0.0532435	0.0385608	0.0411541	0.0385608	0.643965	0.514009	0.643965	0.551325	0.152449	0.178988	0.222076	0.107288	0.222076	94.1127	15.0985	2.44568	2.27924	1.68752	0.0263179	0.506893	0.547121	0.223381	1.29527	2.51381	0.0130719
2020-12-02	LM-JB-7D-16	epithermal	pyrite		16.8592	2.18198	0.28784	508735	28083.5	5.72093	8.36718	1.79743	0.0459673	12.0851	5.34567	0.601954	1683.81	1281.27	0.260699	44.6355	43.1626	0.875355	0.0461568	0.0285252	0.0461568	0.0571923	0.0328311	0.0571923	0.728054	0.253976	0.728054	0.548085	0.244299	0.17309	3.31749	1.84989	0.260246	69.7976	23.2948	2.40677	25.7244	37.8287	0.0671484	0.489711	0.35827	0.22455	9.18325	8.99778	0.000227871
2020-12-02	LM-JB-7D-17	epithermal	pyrite		22.7575	7.33126	0.237706	501049	27381.2	11.6244	1.72544	0.652925	0.0567252	5.27322	4.97601	0.301672	61.4669	31.9226	0.247014	10.2179	17.2792	0.87336	0.0785744	0.0750869	0.0785744	0.101439	0.0760716	0.101439	0.548474	0.464075	0.548474	0.187514	0.0625574	0.187514	4.9259	5.3932	0.174082	13.7487	3.18237	1.81364	52.8978	80.3346	0.0697432	0.424469	0.701829	0.205644	0.0803686	0.11955	0.0110092
2020-12-02	LM-JB-7D-19	epithermal	pyrite		16.1896	0.923335	0.242494	504190	47900	8.20609	6.88153	5.76195	0.0502277	14.7922	10.0595	0.324322	8.06466	9.13284	0.342895	186.749	156.788	1.06339	0.0838072	0.0718482	0.0789347	0.164259	0.10648	0.0249087	0.756082	0.456796	0.756082	0.819358	0.313072	0.207063	0.307889	0.13816	0.307889	126.409	13.7144	2.2139	0.27371	0.162915	0.0320468	3.27713	1.99625	0.107183	8.49475	9.78851	0.0189305
2020-12-02	LM-JB-7D-20	epithermal	pyrite		16.7626	1.39484	0.321618	506899	44866.3	7.46951	0.0350395	0.0315585	0.0334382	0.362771	0.243578	0.362771	17.6733	7.77663	0.36823	300.552	100.123	1.51954	0.0598558	0.0391044	0.0598558	0.0409102	0.0341605	0.0409102	0.573513	0.497417	0.452651	0.242357	0.169363	0.107939	0.188354	0.146572	0.188354	47.3132	9.96204	3.53913	1.35485	0.409155	0.0561275	7.4047	3.28037	0.00240675	19.8224	5.91744	0.00614061
2020-12-02	LM-JB-7D-23	epithermal	pyrite		16.6755	1.42439	0.334088	531101	42607.5	12.1248	27.4078	7.25114	0.0385801	0.384699	0.270395	0.384699	51.7654	41.5178	0.335942	1.10465	0.986058	1.10465	0.0498258	0.022939	0.0498258	0.0807066	0.0273113	0.0807066	0.564371	0.498386	0.564371	0.414485	0.16514	0.149084	1.46329	0.364504	0.308845	70.8629	3.92678	1.80739	1.53832	1.84325	0.0287048	0.266786	0.134157	0.266786	0.112851	0.2131	0.00975606
2020-12-02	LM-JB-7D-24	epithermal	pyrite		15.7698	1.50092	0.260831	502147	46261.3	8.11322	8.481	1.15648	0.0384475	0.187204	0.06524	0.187204	8.7169	1.0829	0.294237	1.23177	0.684787	1.23177	0.0351908	0.04346	0.030589	0.0520144	0.00152795	0.0520144	0.995467	0.685228	0.995467	0.600127	0.116514	0.127355	9.66555	0.710839	0.214123	97.8972	13.5951	1.75864	0.853714	1.68752	0.0639537	0.208507	0.20549	0.208507	0.0114645	0.00725447	0.0114645
2020-12-02	LM-JB-7D-25	epithermal	pyrite		17.0505	1.64507	0.500863	505580	44598.1	10.4583	11.5247	0.974382	0.027181	0.312783	0.407626	0.312783	12.4199	4.25792	0.309034	1.58613	0.495691	1.58613	0.0477309	0.0209253	0.0477309	0.0590881	0.032474	0.0590881	0.829474	0.746638	0.65084	0.614323	0.215845	0.203729	5.53578	1.9005	0.321842	108.205	2.35804	1.78077	0.0185304	0.0450421	0.0168096	0.107005	0.00196462	0.107005	0.00799522	0.00634038	0.00799522
2020-12-02	LM-JB-7D-26	epithermal	pyrite		18.589	1.32788	0.32868	497980	48974	10.7491	1478.7	455.13	0.0594046	2.66401	0.424949	0.303674	38.8246	4.24182	0.359044	1.06738	0.499131	1.06738	0.0956747	0.00368918	0.0956747	0.0584012	0.0589392	0.0404438	0.443386	0.552671	0.443386	0.336379	0.202815	0.206979	23.2053	2.5938	0.303635	62.4049	19.7549	2.50282	0.125269	0.189262	0.038143	0.108424	0.00304772	0.108424	0.00954968	0.0134619	0.00954968
2020-12-02	LM-JB-7D-27	epithermal	pyrite		15.5046	2.51736	0.212342	489875	33359.3	7.52012	0.0296355	0.0458218	0.0296355	0.352591	0.176783	0.352591	30.4685	2.92189	0.321125	1.22949	0.617366	1.22949	0.055118	0.0329352	0.055118	0.0624661	0.04482	0.0624661	0.838579	0.493741	0.585975	1.20693	0.243937	0.17281	64.9476	36.9202	0.253251	209.228	45.729	1.55986	0.0466158	0.0461094	0.020913	0.206292	0.093208	0.206292	0.0168857	0.00433119	0.0168857
2020-12-02	LM-JB-7D-28	epithermal	pyrite		16.7067	0.773732	0.160844	508115	26855.7	8.66477	232.852	76.4323	0.0297073	0.684003	0.313613	0.45413	57.2776	36.88	0.171686	3.53067	6.49619	1.07634	0.0549499	0.0384101	0.0549499	0.0391996	0.0490117	0.0391996	0.396425	0.375931	0.396425	1.21266	0.393149	0.172107	51.7155	8.46439	0.33959	186.5	38.4497	1.3152	0.1334	0.279694	0.0210763	0.222498	0.335655	0.130821	0.382955	0.758036	0.00730295
2020-12-02	LM-JB-7D-29	epithermal	pyrite		16.3026	0.491684	0.239338	494072	27220	10.1876	188.936	20.3444	0.0461849	5.29443	1.53583	0.211035	606.199	320.416	0.239885	29.2584	12.162	2.30144	0.0908714	0.0805288	0.0540141	0.0900417	0.10469	0.0304532	0.593853	0.464433	0.457417	0.697845	0.147379	0.180248	98.0738	13.0843	0.290347	71.6663	9.77817	1.51672	0.526209	0.412799	0.0270071	1.68611	0.975068	0.131055	10.4147	2.91427	0.0165456
2020-12-02	LM-JB-7D-30	epithermal	pyrite		16.3006	0.782054	0.280759	510629	41273	9.03962	0.908463	0.921286	0.0397242	0.242192	0.195562	0.242192	2.34179	0.848954	0.258308	0.988217	0.518058	0.988217	0.0379026	0.034191	0.0379026	0.031284	0.00104511	0.031284	0.659103	0.518403	0.659103	0.390657	0.159228	0.111008	1.38649	0.478729	0.214145	83.7317	20.5638	2.15279	0.0388865	0.0306765	0.0388865	0.158374	0.101046	0.158374	0.00543582	0.00738789	0.00543582
2020-06-09	LM33a_I_py3	epithermal	pyrite		n.a.			431579	51814.6	16.608	61.2942	18.7174	0.0373539	388.67	109.776	0.305225	20.3307	6.49027	0.460472	3.10006	1.81625	3.10006	n.a.			n.a.			n.a.			n.a.			1511.99	620.667	0.385017	13.2977	3.07205	2.12349	13.4275	5.80638	0.0276794	0.0897362	0.12044	0.0897362	n.a.
2020-06-09	LM33a_I_py1	epithermal	pyrite		n.a.			410933	69669.3	16.6229	116.794	48.4304	0.0394962	543.816	278.707	0.250388	4.49945	2.29522	0.337407	10.3405	14.7776	2.30805	n.a.			n.a.			n.a.			n.a.			66.7544	79.0586	0.326938	4.35939	2.74296	1.30365	0.526549	0.178882	0.0235055	0.201974	0.127514	0.201974	n.a.
2020-06-09	LM33a_II_py1	epithermal	pyrite		n.a.			423817	58647.7	15.3892	114.292	55.3259	0.0365869	274.697	138.133	0.251548	6.88046	4.16741	0.406403	6.02032	5.79425	2.47906	n.a.			n.a.			n.a.			n.a.			703.709	524.09	0.196488	29.5476	21.691	1.84189	1.26008	0.732038	0.0222403	0.0915452	0.0582786	0.0915452	n.a.
2020-06-09	LM33a_III_py1	epithermal	pyrite		n.a.			395206	22377.6	19.4934	8.01197	5.98862	0.03036	329.181	194.42	0.207747	2275.25	1089.74	0.462363	62.6075	27.8476	5.43736	n.a.			n.a.			n.a.			n.a.			2.30311	1.39525	0.253969	5.14492	1.59663	1.47268	7.51318	2.62431	0.0349072	1.22574	0.681379	0.228777	n.a.
2020-06-09	LM33a_III_py3	epithermal	pyrite		n.a.			422151	74981.4	16.4325	0.0300305	0.0291819	0.0300305	7.05561	2.65527	0.208342	579.03	196.665	0.516911	225.726	285.386	2.00024	n.a.			n.a.			n.a.			n.a.			3.12767	0.725358	0.299528	3.58328	0.943093	2.25713	7.59083	2.04634	0.0136107	4.30022	4.71066	0.155989	n.a.
2020-06-09	LM33a_XIII_py1	epithermal	pyrite		n.a.			370165	43396.8	19.7917	13.3021	1.72727	0.0374695	721.463	86.1889	0.465805	188.598	28.1228	0.655187	33.1988	12.5618	2.98348	n.a.			n.a.			n.a.			n.a.			351.99	72.9398	0.513602	4.49794	3.01747	2.66477	62.6907	10.5316	0.0336689	0.922692	0.333741	0.335196	n.a.
2020-06-09	LM33a_VIII_py1	epithermal	pyrite		n.a.			382441	44628.2	14.6575	0.0587199	0.0355405	0.0431605	3.40093	0.725848	0.253503	16.577	2.39319	0.52005	1480.39	178.512	2.33355	n.a.			n.a.			n.a.			n.a.			0.258102	0.178435	0.258102	2.34586	0.872999	2.34586	3.37438	1.16134	0.0319165	10.8381	1.22117	0.204892	n.a.
2020-06-09	LM33b_III_py6	epithermal	pyrite		n.a.			419026	30163.8	8.58377	188.856	126.592	0.0358108	228.08	263.593	0.211937	22.3712	18.5909	0.538624	4.42816	9.94062	4.22916	n.a.			n.a.			n.a.			n.a.			262.807	136.557	0.253259	5.94272	3.51707	1.24812	0.345695	0.540257	0.0262664	0.12275	0.0966059	0.12275	n.a.
2020-06-09	LM33b_X_py1	epithermal	pyrite		n.a.			417083	34340.6	13.9184	0.103693	0.0486318	0.0340594	1.68606	0.437915	0.229479	67.2355	24.2225	0.534695	483.813	94.7731	4.61298	n.a.			n.a.			n.a.			n.a.			0.236336	0.19768	0.236336	3.27751	1.45847	2.57824	1.69522	0.204823	0.0337675	2.3562	0.755254	0.115142	n.a.
2020-06-09	LM33b_X_py3	epithermal	pyrite		n.a.			492940	106892	55.294	26.9117	18.4249	0.0656144	600.138	273.516	1.29706	5437.15	10626.9	1.78459	1372.3	2562.71	11.7477	n.a.			n.a.			n.a.			n.a.			218.324	264.744	0.587479	5.8055	6.29543	5.8055	2536.88	3254.25	0.10012	3.97339	6.8759	0.44308	n.a.
2020-06-09	LM33b_III_py9	epithermal	pyrite		n.a.			422534	28052.7	13.5189	43.0964	11.7067	0.0288933	415.523	131.41	0.415593	619.324	254.7	0.581365	912.406	490.4	4.06986	n.a.			n.a.			n.a.			n.a.			20.6934	6.83058	0.301699	6.03453	1.85872	1.33703	1236.05	887.843	0.0313653	11.1015	9.39855	0.198463	n.a.
2020-06-09	LM33b_III_py5	epithermal	pyrite		n.a.			450672	47129.5	13.3812	1.51883	0.335655	0.0524535	8.64878	2.48686	0.255277	23.3892	13.814	0.743092	601.149	52.7737	3.16581	n.a.			n.a.			n.a.			n.a.			4.16739	6.12624	0.377309	3.67765	3.48672	1.09031	14.4531	9.11875	0.0287313	4.91046	2.12139	0.152042	n.a.
2020-06-09	LM33b_III_py4	epithermal	pyrite		n.a.			421515	58414.9	14.4682	0.394717	0.265648	0.0342033	43.684	25.1985	0.194296	33.9009	15.0885	0.437184	71.2611	87.9068	3.02703	n.a.			n.a.			n.a.			n.a.			0.354425	0.205704	0.354425	5.1636	2.93428	1.76883	0.971166	0.795967	0.0302197	3.22741	5.80473	0.135282	n.a.
2020-06-09	LM33b_III_py2	epithermal	pyrite		n.a.			378958	42412.9	13.6783	1.74622	0.651011	0.0449843	10.6548	7.37988	0.25139	17.7398	9.46901	0.601948	530.494	360.597	3.40178	n.a.			n.a.			n.a.			n.a.			0.268611	0.348158	0.248569	2.75669	1.20269	1.55972	1.12869	0.503333	0.0272445	2.58371	1.20174	0.188084	n.a.
2020-06-09	LM33b_II_py2	epithermal	pyrite		n.a.			418514	86347.4	48.4526	3.8851	1.69957	0.0846343	210.871	59.8844	0.701387	40951.2	59717.9	1.29418	155.109	27.0375	7.75379	n.a.			n.a.			n.a.			n.a.			129.578	22.0223	0.923573	4.02343	4.32109	4.02343	125.115	74.9093	0.0928157	2.62814	1.36164	0.139054	n.a.
2020-06-09	LM33b_IV_py10	epithermal	pyrite		n.a.			436712	51382.5	15.9811	23.8862	8.9992	0.0330602	269.728	105.793	0.334295	92.3409	59.7326	0.623822	110.9	106.263	3.25271	n.a.			n.a.			n.a.			n.a.			22.2294	6.99695	0.218433	17.0535	8.26563	2.17699	104.298	52.1698	0.014561	0.382916	0.254567	0.140227	n.a.
2020-06-09	LM33b_IV_py8	epithermal	pyrite		n.a.			414506	34130.4	13.537	0.153755	0.0550137	0.0438619	0.624475	0.401389	0.229891	88.6564	32.771	0.760751	407.504	121.317	3.19323	n.a.			n.a.			n.a.			n.a.			0.445055	0.509587	0.229445	4.92489	1.39019	1.15235	1.57133	0.261478	0.0249892	2.39104	0.812591	0.132982	n.a.
2020-06-09	LM33b_IV_py4	epithermal	pyrite		n.a.			430408	13698.4	13.9932	4.20228	2.36667	0.0298493	1820.89	647.706	0.128818	116.458	195.681	0.428783	3.24742	4.26947	3.24742	n.a.			n.a.			n.a.			n.a.			2164.53	1321.94	0.156664	6.71763	2.58563	1.51938	1.90252	1.06025	0.0246998	0.128106	0.184743	0.0947678	n.a.
2020-06-09	LM33b_XI_py5	epithermal	pyrite		n.a.			413649	42808	15.3276	26.8455	8.63397	0.0339274	905.713	259.012	0.278985	170.831	251.606	0.527522	480.43	351.468	3.21092	n.a.			n.a.			n.a.			n.a.			50.2004	28.0933	0.264598	6.15408	1.86864	1.05251	1085.75	978.762	0.0392651	2.29545	1.5982	0.165421	n.a.
2020-06-09	LM33b_XI_py1	epithermal	pyrite		n.a.			431455	33604.7	16.9575	15.9343	7.94339	0.0387823	264.239	132.025	0.192004	243.447	197.022	0.639084	8.34724	9.13957	3.37758	n.a.			n.a.			n.a.			n.a.			11.0646	6.19724	0.295176	5.56379	2.15044	1.29835	517.966	259.45	0.0311347	0.148376	0.114031	0.148376	n.a.
2020-12-02	LM-JB-03-01	epithermal	pyrite		16.014	1.48596	0.218973	506180	49672.5	10.3753	496.209	182.965	0.0269157	189.348	27.7384	0.258888	12.1017	4.96167	0.175972	0.998927	0.749709	0.998927	0.0623608	0.0313927	0.0623608	0.0500679	0.0347784	0.0500679	0.568709	0.356321	0.34962	0.573529	0.202094	0.131922	532.467	71.8432	0.243839	100.887	4.06304	0.891829	0.0290871	0.0350284	0.0290871	0.136548	0.0932402	0.136548	0.0112362	0.0111254	0.00502053
2020-12-02	LM-JB-03-02	epithermal	pyrite		16.0743	1.47915	0.331777	468838	75972.4	9.59622	296.726	66.3866	0.0514392	167.167	17.4924	0.378407	4.55879	0.163527	0.307671	1.44955	1.16019	1.44955	0.0535802	0.0219722	0.0535802	0.0579951	0.00116505	0.0579951	0.486989	0.510843	0.486989	1.31023	0.695193	0.103686	1041.89	17.5777	0.380672	199.174	48.2084	1.10538	0.0200791	0.0199847	0.0200791	0.235825	0.0040854	0.235825	0.007923	0.00810021	0.007923
2020-12-02	LM-JB-03-03	epithermal	pyrite		16.9628	0.758643	0.156371	479187	65158.6	9.75204	219.892	87.2889	0.0322224	122.022	79.1108	0.367912	3.45383	1.13387	0.231162	1.29193	0.978281	1.29193	0.0344076	0.0374917	0.0344076	0.143119	0.103794	0.0343033	0.698271	0.601913	0.352353	1.13246	0.30521	0.140168	916.034	268.183	0.206153	114.637	22.8004	1.39465	0.0691368	0.050751	0.0374295	0.141533	0.0745303	0.141533	0.00687174	0.0128937	0.00518649
2020-12-02	LM-JB-03-04	epithermal	pyrite		16.2108	1.43371	0.21996	505920	22744.8	4.91956	146.634	101.783	0.0220747	83.4375	48.0047	0.327981	0.299545	0.507804	0.221498	1.25361	0.975321	1.25361	0.0367376	0.0318047	0.0367376	0.0687061	0.00259908	0.0687061	0.494048	0.301247	0.494048	2.63997	0.636782	0.134492	914.964	107.242	0.243834	368.711	61.2066	1.09003	0.0181868	0.000985841	0.0181868	0.251385	0.0830723	0.251385	0.0183706	0.00641421	0.0183706
2020-12-02	LM-JB-03-05	epithermal	pyrite		15.388	1.17641	0.289051	498718	20331.2	9.97945	9.5036	6.31887	0.0403265	275.607	116.689	0.189491	8.51514	4.03656	0.183668	1.061	0.380656	1.061	0.0479396	0.0628993	0.0479396	0.0984794	0.191607	0.0583186	0.513741	0.313784	0.513741	0.214228	0.0998907	0.214228	314.983	35.7011	0.234442	12.3167	3.64664	1.60898	0.0246798	0.0254857	0.0246798	0.122197	0.107166	0.122197	0.0120103	0.00608962	0.0120103
2020-12-02	LM-JB-03-06	epithermal	pyrite		26.637	14.3708	0.28153	472107	37307.1	9.76034	462.077	77.0435	0.0285163	61.3362	10.6619	0.232787	8.80932	4.08385	0.284349	1.39264	0.704459	1.39264	0.24097	0.104586	0.0492158	0.400719	0.214122	0.0611208	1.43216	0.590824	0.295464	0.599752	0.323144	0.173201	559.85	79.6782	0.174872	76.8218	32.5675	1.58474	0.0842038	0.0538797	0.01761	0.0898936	0.145672	0.0898936	0.0184202	0.0058137	0.0184202
2020-12-02	LM-JB-03-07	epithermal	pyrite		15.3315	1.25782	0.2688	498013	25586.2	6.8751	654.787	322.701	0.028291	47.3501	13.0648	0.294074	22.6317	35.2373	0.212055	0.995471	0.387191	0.995471	0.0561187	0.0308665	0.0561187	0.0423625	0.00200525	0.0423625	0.688213	0.700063	0.401499	0.387707	0.155982	0.155636	305.621	58.1014	0.189608	62.7842	15.5126	1.44305	0.0435965	0.035406	0.0332133	0.124923	0.182155	0.124923	0.0168915	0.000460225	0.0168915
2020-12-02	LM-JB-03-08	epithermal	pyrite		16.1317	0.86024	0.224328	488997	50920.4	7.84088	1960.61	2827.28	0.0497975	64.175	35.6188	0.279885	38.8329	48.5339	0.224821	1.05344	0.522329	1.05344	0.0361009	0.0317259	0.0361009	0.0209966	0.0201569	0.0209966	0.543859	0.53155	0.396216	0.342038	0.299311	0.170703	390.061	443.102	0.19966	47.0115	27.1329	1.0746	0.197223	0.17103	0.0245806	0.209406	0.246604	0.209406	0.0112311	0.0193098	0.0112311
2020-12-02	LM-JB-03-09	epithermal	pyrite		14.996	1.39396	0.282767	479119	30768.4	15.1656	1226.04	626.071	0.0328794	16.3416	7.93115	0.378184	0.861285	0.738816	0.22091	0.800658	0.57442	0.800658	0.0367239	0.0290652	0.0367239	0.0211228	0.0173182	0.0211228	0.567204	0.240564	0.567204	1.77626	0.390801	0.118224	488.033	258.199	0.295365	238.311	41.4722	0.873783	0.037233	0.0163413	0.037233	0.0904761	0.0990013	0.0904761	0.0127059	0.00502565	0.0127059
2020-12-02	LM-JB-03-10	epithermal	pyrite		62.6771	12.3465	0.275491	455376	56464.3	9.86585	771.159	469.793	0.0303623	331.864	218.28	0.294611	40.6988	7.49412	0.171689	4.92359	2.97563	1.12766	0.145021	0.0807831	0.0406459	0.0756264	0.0551182	0.0756264	0.57788	0.283934	0.57788	0.636642	0.219099	0.187899	2043.92	475.224	0.224592	107.22	19.535	1.2758	0.379489	0.0908472	0.0234817	0.193797	0.159631	0.13348	0.00919072	0.0173413	0.00788005
2020-12-02	LM-JB-03-11	epithermal	pyrite		15.3347	1.17128	0.230636	474468	20794.2	13.9924	310.444	169.139	0.0635007	386.033	277.154	0.295779	0.22508	0.124847	0.22508	0.933152	0.580002	0.933152	0.0669077	0.0364246	0.0669077	0.0365457	0.0285682	0.0365457	0.581661	0.326105	0.389944	0.508756	0.388901	0.197049	809.757	210.861	0.264881	75.0503	34.1466	1.15778	0.0345789	0.00232082	0.0345789	0.223703	0.0871506	0.223703	0.013783	0.00588394	0.013783
2020-12-02	LM-JB-03-12	epithermal	pyrite		15.069	1.07426	0.278235	491274	43620.9	4.06849	115.77	96.0304	0.0412577	3594.58	4776.59	0.324268	1.56073	1.25065	0.26671	1.54055	0.445837	1.54055	0.063382	0.0381136	0.063382	0.0541763	0.0332382	0.0541763	0.730079	0.469963	0.456011	1.29476	0.298709	0.128585	3505.43	1257.69	0.224518	190.081	43.9279	1.25818	0.07187	0.0795439	0.013803	0.260597	0.145677	0.260597	0.015214	0.013904	0.015214
2020-12-02	LM-JB-03-13	epithermal	pyrite		14.7908	1.69817	0.229482	492395	54634	8.69765	312.337	122.986	0.0401464	110.235	54.0254	0.380431	0.303412	0.25742	0.303412	0.937585	0.470914	0.937585	0.0264662	0.0250395	0.0264662	0.0371908	0.0180328	0.0371908	0.755348	0.347354	0.337173	0.865275	0.13448	0.116799	391.158	101.827	0.272611	146.151	33.1204	1.38353	0.0373143	0.023024	0.0373143	0.163344	0.145475	0.163344	0.0101161	0.000162219	0.0101161
2020-12-02	LM-JB-03-14	epithermal	pyrite		15.7266	1.15119	0.316267	472709	49401.2	6.41606	1080.23	585.62	0.0285593	38.4462	8.70333	0.270707	3.33173	1.93955	0.2061	1.27006	0.752326	1.27006	0.0269489	0.0177943	0.0269489	0.0602723	0.0417064	0.0299038	0.837424	0.858565	0.366169	0.935256	0.31539	0.131248	978.958	264.414	0.239847	129.434	40.0935	2.20068	0.0667729	0.0425947	0.0392061	0.089625	0.00274377	0.089625	0.00535025	0.00585853	0.00535025
2020-12-02	LM-JB-03-15	epithermal	pyrite		16.5804	1.86312	0.266616	511816	27674.7	11.0859	34.4514	8.81334	0.0420902	58.5752	23.0293	0.560518	2.91936	1.9399	0.136114	1.02171	0.997945	0.542776	0.0365618	0.0170952	0.0365618	0.051544	0.0616406	0.051544	0.678329	0.359386	0.316648	1.87849	0.422836	0.210307	807.363	98.9294	0.28563	243.901	49.3796	1.86243	0.0626288	0.0557292	0.0213352	0.102421	0.103425	0.0864338	0.00709475	0.00653735	0.00709475
2020-12-02	LM-JB-03-16	epithermal	pyrite		16.0681	1.07277	0.297059	498922	45715.2	9.07564	443.742	53.6908	0.0462528	58.1175	20.7975	0.379946	0.445224	0.290408	0.1979	1.2645	1.0272	1.2645	0.0846073	0.0182857	0.0846073	0.0531891	0.0176507	0.0531891	0.56572	0.423111	0.56572	0.831009	0.110169	0.122898	762.834	102.672	0.232996	123.647	6.42394	1.73215	0.0300676	0.0314009	0.0217786	0.22153	0.193508	0.22153	0.0126259	0.00057568	0.0126259
2020-12-02	LM-JB-03-17	epithermal	pyrite		15.5844	1.15211	0.348596	517290	36352.7	8.12702	430.582	69.6887	0.0220633	43.369	13.1433	0.250315	1.23255	0.663685	0.193299	0.696212	0.87658	0.696212	0.0510426	0.0187368	0.0510426	0.0338498	0.0334771	0.0338498	0.609553	0.378604	0.609553	1.0281	0.464829	0.136609	844.785	125.23	0.282143	144.618	22.8267	1.92329	0.0137035	0.0274526	0.0135149	0.0038473	0.00411271	0.0038473	0.00698949	0.00633139	0.00698949
2020-12-02	LM-JB-03-18	epithermal	pyrite		15.4596	1.27088	0.242866	473000	40473.4	9.21594	647.063	152.936	0.0565628	172.606	25.5838	0.236887	1.43835	2.31475	0.226785	1.45568	1.04972	1.08847	0.0454401	0.0230224	0.0454401	0.0287205	0.0239818	0.0287205	0.581405	0.312858	0.363153	1.17824	0.267227	0.21942	500.196	67.136	0.328182	165.042	12.3026	0.960744	0.0379686	0.0143837	0.0379686	0.200598	0.0712264	0.200598	0.0117153	0.00354229	0.0117153
2020-12-02	LM-JB-7a-01	epithermal	sphalerite		2978.41	83.8816	0.277683	5903.21	250.851	11.3744	4.78776	0.857169	0.052566	0.345178	0.467515	0.345178	7546.39	1108.64	0.289916	597328	50293.4	2.2348	1.4953	0.374671	0.0675127	1.20656	0.498738	0.124815	1.15143	0.879202	1.15143	0.359839	0.234789	0.359839	0.410453	0.341215	0.410453	2.87891	1.4885	2.87891	9.11365	1.84689	0.0576195	3839.07	199.732	0.286953	0.668483	0.181736	0.0116697
2020-12-02	LM-JB-7a-08	epithermal	sphalerite		3748.33	376.128	0.464653	5991.95	2235.35	14.0762	18.4988	1.33589	0.0407442	0.463308	0.518613	0.463308	6439.82	3854.76	0.389955	597372	7525.9	1.15613	2.32726	0.473536	0.0928619	1.91569	0.356824	0.120776	0.707725	1.03733	0.707725	0.276658	0.239072	0.276658	0.464019	0.234816	0.464019	2.10563	2.1433	2.10563	11.4736	10.2445	0.000577028	3668.27	420.092	0.342687	2.08731	0.159154	0.0253912
2020-12-02	LM-JB-7a-09	epithermal	sphalerite		4884.32	545.499	0.306806	5668.97	503.759	12.7403	20.6785	1.26413	0.0483024	1.51554	0.542353	0.575673	7180.75	1843.83	2.05186	577025	31637	1.1331	2.23968	0.622716	0.06099	2.23943	0.655416	0.0872604	0.985067	0.366799	0.985067	0.132949	0.196085	0.132949	0.508293	0.296878	0.508293	2.22035	1.42174	2.22035	14.9909	2.24605	0.0302018	3679.04	343.96	0.192121	0.265243	0.146467	0.0187157
2020-12-02	LM-JB-7a-10	epithermal	sphalerite		3434.61	559.182	0.458807	8270.21	3283.65	12.4777	17.4825	0.756217	0.0634068	0.914725	0.614663	0.368782	9286.35	3726.42	0.429481	588819	16208.2	1.77599	1.78261	0.984198	0.0760063	1.84831	0.743463	0.130275	0.683173	0.94368	0.683173	0.266344	0.0518745	0.266344	0.453201	0.117265	0.453201	3.65213	0.942341	3.65213	21.3761	2.02849	0.0763034	3848.19	501.113	0.377195	0.468348	0.13662	0.00873469
2020-12-02	LM-JB-7a-11	epithermal	sphalerite		5779.92	1139.1	0.254227	7823.03	1849.09	11.4797	11.1034	3.26933	0.0547667	1.22271	0.609207	0.401941	6348.43	2176.19	0.239319	708995	141934	1.80093	5.86053	1.58679	0.101392	5.83035	2.04342	0.055749	0.555722	0.885442	0.555722	0.273736	0.163566	0.273736	1.72423	2.00698	0.612792	2.20358	2.19201	2.20358	13.7854	4.69872	0.100335	4036.5	587.345	0.207993	0.525024	0.374597	0.0116912
2020-12-02	LM-JB-7a-12	epithermal	sphalerite		3650.32	647.941	0.312477	6984.49	1604.88	13.9802	15.4286	0.052809	0.0577805	0.873614	0.388051	0.456352	7126.31	1173.78	0.250626	599618	30648.4	1.48874	4.63918	1.50954	0.106597	3.71445	2.05337	0.0394512	0.777774	0.398198	0.777774	0.308114	0.0366715	0.308114	0.407708	0.955885	0.407708	2.97824	2.52188	2.97824	14.2067	0.615813	0.0606563	3638.66	639.482	0.373352	2.11642	0.0380767	0.0193499
2020-12-02	LM-JB-7a-18	epithermal	sphalerite		1631.04	256.319	0.264949	5388.42	672.77	9.2286	1.824	0.288975	0.0663165	0.351408	0.217377	0.351408	896.376	1040.51	0.379756	585083	38835.5	1.99154	0.494993	0.156474	0.100605	0.442038	0.114467	0.103334	1.00245	0.385073	1.00245	0.141841	0.132007	0.141841	0.273198	0.168661	0.273198	2.32852	2.03108	2.32852	2.77571	3.64417	0.0338556	3496.47	250.438	0.293631	0.0716298	0.025192	0.0114275
2020-12-02	LM-JB-7a-19	epithermal	sphalerite		863.683	35.1874	0.243275	5475.81	1305.6	9.36791	63.4412	2.31854	0.0287133	0.679339	0.387308	0.472622	2908.45	2841.64	0.229975	579416	11897.6	2.12179	1.35456	0.219897	0.0666869	1.43715	0.199281	0.0398311	0.720111	0.4195	0.720111	0.186206	0.165979	0.186206	0.441993	0.395923	0.441993	2.4972	2.14671	2.4972	2.79816	1.75583	0.0603587	3697.49	117.093	0.173386	1.74265	0.226306	0.0163195
2020-12-02	LM-JB-7a-20	epithermal	sphalerite		1476.4	364.491	0.319627	4803.04	1282.47	7.47768	60.2299	3.5007	0.0294815	0.379609	0.167832	0.379609	1802.97	1769.16	0.255886	580644	31765.7	1.9756	0.917769	0.201221	0.0862682	0.928268	0.372403	0.0701804	0.903732	0.500915	0.903732	0.184177	0.120805	0.184177	0.415385	0.167105	0.415385	2.17771	1.26095	2.17771	3.76051	2.28856	0.0193048	3505.84	365.384	0.312864	0.923997	0.14413	0.015739
2020-06-09	LM-27B	epithermal	sphalerite		n.a.			5703.91	1026.73	24.2696	85.6768	8.22286	0.0742806	2.14881	0.701717	0.452541	1904.96	616.435	1.44834	827636	61057.2	3.7057	n.a.			n.a.			n.a.			n.a.			0.68548	0.518646	0.68548	7.77043	2.04507	2.10096	3.07911	0.973486	0.0636352	3848.56	381.399	0.297654	n.a.
2020-06-09	LM-27B	epithermal	sphalerite		n.a.			5832.58	771.828	19.6261	89.0116	10.0518	0.0464341	1.53622	0.438984	0.431477	2374.38	363.372	0.962779	838811	50308.2	8.25586	n.a.			n.a.			n.a.			n.a.			0.500359	0.336169	0.327862	3.87949	2.14336	3.07443	5.2408	0.890798	0.0616166	3779.71	374.618	0.231594	n.a.
2020-06-09	LM27B_VI_sp1	epithermal	sphalerite		n.a.			9939.04	2383.54	34.5574	51.0557	6.4829	0.0888709	2.7749	0.587261	0.596748	9523.02	1777.63	1.39611	889953	68382.1	6.04129	n.a.			n.a.			n.a.			n.a.			2.75873	0.597717	0.983572	3.80618	2.75218	2.65645	18.4701	2.73957	0.0773764	4778.48	471.191	0.38365	n.a.
2020-06-09	LM-27B	epithermal	sphalerite		n.a.			10621.8	2302.45	25.5456	22.0927	1.38964	0.0511643	2.84436	0.657798	0.580311	11312.2	2091.07	0.673146	821133	55032.5	4.62332	n.a.			n.a.			n.a.			n.a.			0.539442	0.265228	0.539442	2.61763	1.7676	2.61763	14.7327	1.24716	0.0405647	4154.84	366.91	0.276075	n.a.
2020-06-09	LM-27B	epithermal	sphalerite		n.a.			8702.29	1477.3	19.814	69.4337	7.51835	0.0543389	3.58266	0.56342	0.326883	9197.29	1709.09	0.85737	820204	49363.8	5.12684	n.a.			n.a.			n.a.			n.a.			0.431091	0.319555	0.296231	3.37746	1.62073	2.11455	9.6522	2.27243	0.048019	4065.76	394.748	0.197342	n.a.
2020-06-09	LM-27B	epithermal	sphalerite		n.a.			7566.58	1271.89	20.1021	73.6746	6.97883	0.0457769	1.97391	0.422642	0.334277	8361.88	886.282	0.607536	818615	58019.4	4.3825	n.a.			n.a.			n.a.			n.a.			0.383478	0.294749	0.383478	3.9831	4.09094	1.81209	15.0223	2.46967	0.0425276	3939.87	269.66	0.194237	n.a.
2020-09-09	LM-27B-72	epithermal	sphalerite		2247.88	227.339	0.120834	5465.24	965.684	6.01511	31.8371	2.38495	0.017253	0.504601	0.202462	0.179411	7292.24	870.613	0.100708	687021	15011.5	2.15695	7.28138	1.08416	0.0242151	7.00203	0.890213	0.0351627	0.277411	0.177238	0.262022	n.a.			2.17802	0.544465	0.479236	1.1489	0.967086	0.873612	7.36714	0.949729	0.0129417	3420.23	76.5821	0.313548	2.0213	0.187218	0.0148001
2020-09-09	LM-27B-71	epithermal	sphalerite		6265.25	404.073	0.150191	13208.3	1605.68	5.7466	18.0654	1.65177	0.0155052	1.13539	0.395484	0.112737	18120.4	2528.93	0.161379	662513	12215.2	3.40258	2.19896	0.356348	0.0310147	2.26797	0.201783	0.0182248	0.28853	0.0870741	0.28853	n.a.			0.538398	0.034234	0.488988	3.05633	2.57456	0.670839	2.20298	0.237092	0.0137483	3035.3	146.642	0.260484	2.63996	0.371672	0.00521572
2020-09-09	LM-27B-74	epithermal	sphalerite		4627.23	165.023	0.117641	5549.15	616.02	4.66419	11.4488	1.08297	0.0195013	1.46352	0.257206	0.233065	3882.95	649.005	0.143194	683150	7319.15	2.99029	6.66316	0.38113	0.0319001	6.50651	0.333758	0.0298063	0.338051	0.222192	0.338051	n.a.			0.342112	0.184499	0.342112	1.64232	1.38308	0.602626	4.84139	1.00663	0.0110754	3447.58	49.0513	0.297306	0.769683	0.0590002	0.00627887
2020-09-09	LM-27B-60	epithermal	sphalerite		5991.12	389.373	0.147376	5317.22	308.668	7.12464	53.6224	1.57731	0.023243	2.13795	0.525389	0.1636	6826.3	240.696	0.154534	669934	12211.3	4.21721	0.858243	0.112496	0.0362481	0.702742	0.0723553	0.027746	0.29327	0.227563	0.29327	n.a.			0.336531	0.322271	0.336531	2.83416	2.10354	0.777936	13.9876	1.00995	0.017902	3108.87	34.2748	0.254913	4.64129	0.460887	0.0122236
2020-09-09	LM-27B-62	epithermal	sphalerite		5306.13	139.283	0.152154	5290.85	273.197	7.97284	59.2895	1.47237	0.0271145	1.95794	0.50646	0.143301	6772.09	859.906	0.13325	686349	14212.3	5.0167	1.25092	0.289146	0.0240845	1.07561	0.290219	0.0361511	0.183737	0.116267	0.183737	n.a.			0.557827	0.207511	0.557827	3.6102	1.64614	0.729457	12.8381	1.314	0.0112709	3105.89	41.9131	0.418171	7.90977	0.55231	0.0128675
2020-09-09	LM-27B-63	epithermal	sphalerite		3977.05	61.7825	0.195767	5796.44	1003.33	8.49543	20.1497	0.66445	0.0272221	2.03672	0.71123	0.184786	5668.75	1374.49	0.207174	672566	12709.4	5.52079	7.69632	0.554062	0.0243296	7.49727	0.650714	0.0159704	0.411438	0.193798	0.411438	n.a.			0.555905	0.324985	0.555905	1.57468	0.729438	1.57468	5.49766	0.999314	0.0157284	3079.93	84.266	0.411287	1.51754	0.1166	0.00972858
2020-09-09	LM-27B-52	epithermal	sphalerite		4656.79	128.974	0.173244	4819.4	323.432	2.63469	88.3341	3.45252	0.0218355	1.76279	0.525886	0.210091	2837.34	530.669	0.177949	664388	23398.9	2.54053	0.432553	0.133381	0.0419165	0.165517	0.106145	0.020148	0.536717	0.071668	0.536717	n.a.			0.348721	0.147591	0.348721	1.73297	1.34472	0.742418	3.31813	0.620355	0.00968191	2926.96	107.997	0.330389	2.5983	0.311058	1.41133e-05
2020-09-09	LM-27B-53	epithermal	sphalerite		3393.25	54.784	0.1572	9056.15	540.408	5.41165	58.2441	1.26055	0.0261738	2.28378	0.31357	0.186245	8708.65	748.123	0.114251	646590	13742.2	5.00508	8.13743	1.0428	0.0248808	7.54209	1.07193	0.0300435	0.482009	0.21078	0.482009	n.a.			0.233912	0.20347	0.233912	0.970651	0.676305	0.970651	9.20474	1.45255	0.0143286	3115.35	38.8178	0.412519	0.72089	0.222411	0.00776754
2020-09-09	LM-27B-54	epithermal	sphalerite		3190.98	116.529	0.204556	4642.46	440.175	6.46492	90.1171	2.56373	0.0288269	1.41572	0.127787	0.167415	2542.82	583.131	0.136414	662794	3717.55	4.89865	0.985101	0.151189	0.0245325	0.694646	0.18682	0.0363118	0.374395	0.249367	0.25072	n.a.			0.452637	0.385485	0.452637	3.00835	0.462505	0.633646	1.90967	0.352613	0.0153161	2969.3	44.5251	0.38574	4.38821	0.121973	0.00862865
2020-09-09	LM-27B-86	epithermal	sphalerite		2941.26	104.082	0.159154	4715.84	403.989	5.49997	88.7142	2.37082	0.0198387	1.24939	0.175622	0.13437	1897.31	444.91	0.166605	664220	11646.6	4.7888	1.48411	0.376588	0.02138	1.35675	0.351056	0.0206145	0.380691	0.233431	0.380691	n.a.			0.347689	0.193429	0.347689	5.29657	1.36414	1.33185	1.46898	0.230965	0.0113678	2971.89	40.4333	0.328711	13.8646	3.99428	1.71511e-05
2020-09-09	LM-27B-88	epithermal	sphalerite		2588.07	133.36	0.210215	4615.14	655.651	6.51714	72.7847	3.31049	0.035569	2.31544	0.426744	0.243952	1600.72	827.11	0.145962	661439	9383.49	5.56868	0.525334	0.139752	0.023319	0.236413	0.0422032	0.0242142	0.307599	0.106419	0.307599	n.a.			0.291421	0.35457	0.291421	2.99326	0.93082	0.905087	2.12971	0.699067	0.0102108	3017.91	68.8901	0.686251	5.50898	0.206926	0.00737833
2020-06-09	LM-29	epithermal	sphalerite		n.a.			1233.02	121.924	21.9819	0.191475	0.0680855	0.0317707	1.63599	0.511841	0.38866	374.781	64.8519	0.941012	887034	101951	4.64115	n.a.			n.a.			n.a.			n.a.			31.4545	7.83769	0.294052	2.54099	1.23893	2.54099	0.95536	0.213975	0.0501356	2632.05	560.358	0.198603	n.a.
2020-09-09	LM-29-94	epithermal	sphalerite		80.6838	3.38103	0.167313	512.596	19.7139	7.24486	0.0390909	0.0233963	0.0195833	0.366139	0.257425	0.178147	156.753	17.7094	0.183936	692147	19935.3	2.74121	68.0585	8.05064	0.0310256	72.072	7.43736	0.0197864	1.29846	0.526906	0.297794	n.a.			7.87365	1.21091	0.341246	1.09435	1.17539	1.09435	2.0295	0.297919	0.0184108	2257.18	90.0176	0.259976	0.0198596	0.0118914	6.90972e-06
2020-09-09	LM-29-99	epithermal	sphalerite		375.815	15.5134	0.200371	978.304	23.0105	5.34876	0.152457	0.0489391	0.018434	0.892168	0.332222	0.211715	291.6	17.0103	0.0979853	711813	22127	4.60806	58.1693	5.61953	0.0248906	59.1235	2.60853	0.0318701	3.60988	0.483271	0.409861	n.a.			29.9039	3.11102	0.521129	1.45758	0.503703	1.45758	5.7462	0.677968	0.0198685	2542.26	55.4541	0.309096	0.032245	0.0206168	0.00385462
2020-09-09	LM-29-97	epithermal	sphalerite		18.3878	0.775035	0.187389	280.669	12.7682	2.77395	0.0661403	0.0246818	0.0306714	0.24609	0.196083	0.185328	97.318	6.69229	0.198847	697740	23845	2.19377	34.7657	2.92913	0.0358673	35.7355	2.85546	0.0238089	0.754525	0.166757	0.384495	n.a.			2.89627	0.659344	0.392332	0.719369	0.841319	0.719369	0.971344	0.13915	0.0133625	2727.24	43.2688	0.17597	0.0141628	0.0160148	0.00952985
2020-09-09	LM-29-150	epithermal	sphalerite		1991.33	78.9612	0.200983	1685.71	139.217	8.26831	0.820436	0.04639	0.0154311	2.03746	0.309441	0.111961	92.6055	2.85266	0.0945705	718090	10885.9	4.20517	48.2095	1.22772	0.0579908	47.2399	1.71211	0.0314358	1.09165	0.503961	0.359996	n.a.			0.772959	1.08691	0.604189	1.87811	1.28045	1.87811	0.24522	0.0501741	0.0279737	2235.18	59.6523	0.112276	1.03626	0.218875	3.10323e-05
2020-09-09	LM-29-148	epithermal	sphalerite		194.603	19.494	0.183689	456.19	18.3454	10.9673	0.0501864	0.0184252	0.0196772	0.754945	0.360281	0.270033	54.0681	3.73223	0.192244	740509	29922.2	4.58271	23.635	1.49849	0.0421909	22.0506	0.951669	0.0649934	0.317515	0.348843	0.317515	n.a.			0.556061	0.121221	0.556061	1.2744	0.782472	1.2744	1.47736	0.319446	0.0258999	2090.89	74.1649	0.317737	0.0186579	0.00900206	0.00685579
2020-09-09	LM-29-149	epithermal	sphalerite		1342.35	154.895	0.120883	1104.75	84.6263	8.09408	1.15033	0.451925	0.044364	0.876813	0.269074	0.221728	150.529	13.787	0.140062	696910	13053	5.74335	170.482	18.8842	0.0370128	172.973	20.4749	0.0349557	1.46601	0.365048	0.391204	n.a.			0.308946	0.245291	0.308946	1.56218	0.489177	1.56218	1.21451	0.178845	0.00952221	2067.93	34.5267	0.344924	0.0197045	0.0104864	0.0132823
2020-09-09	LM-29-125	epithermal	sphalerite		37.1725	3.27721	0.160949	311.113	20.4168	5.66097	0.229127	0.0838402	0.0225027	0.211388	0.170139	0.204204	115.389	9.43216	0.128062	701655	13884.7	3.50646	21.1554	2.61241	0.0536082	21.7499	2.95329	0.0359807	0.395237	0.337871	0.34444	n.a.			0.703638	0.319048	0.532861	1.27227	0.740054	1.27227	0.64108	0.113212	0.0289599	3580.81	55.3309	0.455027	0.111274	0.0390844	0.00665054
2020-09-09	LM-29-126	epithermal	sphalerite		23.2018	0.949949	0.21416	258.976	14.0134	7.85008	0.0434261	0.0331851	0.038295	0.259195	0.18127	0.259195	108.694	43.6243	0.229283	716550	21463.5	4.8695	52.148	19.4379	0.0398788	52.7154	20.0257	0.0352873	1.27112	0.50882	0.560626	n.a.			3.02967	1.88769	0.338233	1.46172	0.523954	1.46172	0.669436	0.387339	0.0313696	2576.73	60.5382	0.688951	0.0436452	0.029426	0.0139116
2020-09-09	LM-29-127	epithermal	sphalerite		155.692	5.27422	0.278591	492.788	22.0015	10.8739	0.0331139	0.0126387	0.0331139	0.59405	0.396178	0.184891	177	31.3243	0.256303	700980	15031	3.57172	51.9913	4.60226	0.0232307	52.4766	6.23698	0.0337775	1.99751	1.14689	0.375437	n.a.			11.6928	4.0412	0.589239	1.51536	0.739019	1.51536	1.44211	0.286447	0.0182211	2237.03	43.6544	0.482704	0.0133444	0.0122236	0.0133039
2020-06-09	LM-33b	epithermal	sphalerite		n.a.			1922.41	236.293	25.8277	1.57177	0.211449	0.0619829	1.17883	0.322696	0.346395	34.4594	3.1858	0.593826	843502	53384.7	5.20984	n.a.			n.a.			n.a.			n.a.			0.533425	0.182343	0.533425	5.16163	2.57908	2.11154	0.181918	0.049248	0.0430527	4339.31	337.791	0.212456	n.a.
2020-06-09	LM-33b	epithermal	sphalerite		n.a.			1897.94	195.998	32.1966	0.492176	0.0820217	0.0534103	0.576538	0.370194	0.25829	29.3505	3.02847	0.718468	857487	60321.3	5.41982	n.a.			n.a.			n.a.			n.a.			0.499455	0.381099	0.499455	2.71521	2.05425	2.71521	0.219801	0.0530693	0.0506217	4544.07	430.359	0.289878	n.a.
2020-06-09	LM-33b	epithermal	sphalerite		n.a.			5002.87	636.783	19.3487	6.20037	0.769957	0.0662971	0.785126	0.334828	0.255594	2853.97	3163.63	0.751603	834856	69684.9	4.20504	n.a.			n.a.			n.a.			n.a.			168.733	207.682	0.478195	3.71084	1.43296	1.85905	234.273	312.763	0.029603	4252.51	404.165	0.178834	n.a.
2020-06-09	LM-33a	epithermal	sphalerite		n.a.			7311.02	1087.58	22.8942	45.7805	3.07424	0.051529	0.852319	0.294455	0.286745	1906.16	1021.82	0.714614	808593	65317.7	4.27603	n.a.			n.a.			n.a.			n.a.			0.603138	0.270305	0.603138	4.42314	1.33274	4.42314	4.05948	0.734493	0.0348274	4047.65	319.575	0.161178	n.a.
2020-06-09	LM-33a	epithermal	sphalerite		n.a.			7532.71	1422.31	17.1323	55.7608	5.65843	0.0689229	1.10813	0.345724	0.463789	3089.57	783.938	0.728657	791527	79959.6	6.60562	n.a.			n.a.			n.a.			n.a.			0.534308	0.402467	0.534308	3.67086	2.05383	2.90351	7.47819	1.09794	0.0316644	4069.59	450.018	0.152756	n.a.
2020-06-09	LM-33a	epithermal	sphalerite		n.a.			1777.25	184.238	17.543	0.197799	0.0459909	0.0370237	0.531164	0.44404	0.531164	59.1056	6.04535	0.670726	868630	49179.1	3.88756	n.a.			n.a.			n.a.			n.a.			5.09815	1.4788	0.581886	2.82773	1.89028	2.82773	0.265893	0.0620802	0.035729	4184.15	220.334	0.225007	n.a.
2020-09-09	LM-33a-251	epithermal	sphalerite		4176.22	103.094	0.193882	6509.12	686.474	6.01778	40.1635	0.964058	0.0263474	1.39742	0.349631	0.152654	2790.34	971.807	0.161804	696762	16087.9	2.22157	2.91084	0.5825	0.0233068	2.48614	0.691013	0.0340834	0.306002	0.188769	0.306002	n.a.			0.281241	0.156945	0.281241	0.886136	0.592568	0.886136	8.2343	0.920747	0.013768	2880.15	60.254	0.180326	0.247147	0.042668	0.00470662
2020-09-09	LM-33a-254	epithermal	sphalerite		2710.41	72.0128	0.18812	6615.57	521.34	5.47011	9.66713	0.610187	0.018519	1.09987	0.188114	0.144458	3358.01	825.018	0.0882903	704159	6790.39	2.26461	3.39876	0.204628	0.0364398	3.24189	0.320237	0.0384858	0.34766	0.176858	0.34766	n.a.			0.355589	0.192014	0.355589	1.24906	0.728266	1.24906	5.23772	0.509351	0.00790366	2956.14	68.0885	0.0912614	0.804421	0.184715	0.0110705
2020-09-09	LM-33a-262	epithermal	sphalerite		4721.5	365.296	0.145126	4258.51	151.339	5.71049	10.8477	0.525215	0.0252453	1.30953	0.177527	0.111168	1023.25	555.881	0.144088	712355	12053.8	3.56004	4.94421	0.53611	0.0214351	4.75425	0.639209	0.0197197	0.264465	0.104806	0.264465	n.a.			0.303729	0.198014	0.254441	3.4665	0.994604	0.590918	4.11347	0.967005	0.016692	3155.48	51.8365	0.192593	3.13043	0.238557	0.00909716
2020-09-09	LM-33a-263	epithermal	sphalerite		4159.75	82.1677	0.161323	2768.17	121.063	4.78717	1.51061	0.11763	0.0186883	1.1485	0.13797	0.133884	194.143	160.11	0.105345	711202	26327	2.2308	13.4702	1.04791	0.0259648	13.6494	0.815927	0.0296577	0.37149	0.221904	0.37149	n.a.			0.35764	0.219196	0.35764	1.10266	1.03698	1.10266	2.65056	0.711396	0.0152785	2888.39	156.563	0.182311	7.48617	0.283234	0.73909
2020-09-09	LM-33a-275	epithermal	sphalerite		5731.93	239.236	0.119509	2203.74	165.3	5.78808	5.37334	0.737097	0.0266448	1.86989	0.332	0.0935223	25.8734	0.732228	0.0953401	720895	7996.77	2.6836	8.68346	0.783666	0.0397242	8.4439	0.573674	0.0300075	0.292934	0.198536	0.292934	n.a.			0.396885	0.22601	0.396885	2.51795	0.716459	1.27876	0.18374	0.110412	0.0290888	3207.14	80.8016	0.142851	1.34469	0.190773	8.76335e-06
2020-09-09	LM-33a306	epithermal	sphalerite		5348.69	205.766	0.127777	1728.62	70.0727	5.2993	5.09018	0.662141	0.0222772	3.13839	0.327033	0.163331	26.2738	3.80474	0.148051	682683	20019.7	2.59532	6.70085	1.52913	0.038649	6.43063	1.45852	0.0176319	0.244608	0.180725	0.244608	n.a.			0.347958	0.303565	0.347958	3.05213	1.29605	1.08922	0.209982	0.0842163	0.00709153	3246.4	43.4876	0.196765	2.75404	0.259171	0.0378326
2020-09-09	LM-33a-302	epithermal	sphalerite		2636.6	538.591	0.380892	4622.65	429.103	6.12095	7.94788	1.01645	0.0286486	0.447107	0.367855	0.447107	5822.97	398.338	0.226282	665333	41076.4	6.02184	4.86059	0.699154	0.0443442	4.70634	0.969504	0.0647678	0.511543	0.230394	0.511543	n.a.			0.639692	0.468651	0.639692	2.31778	3.1617	2.31778	9.66971	1.73237	0.0411711	3188.24	124.451	0.430216	3.62205	0.216069	0.0105377
2020-09-09	LM-64-75	epithermal	sphalerite		2724.98	63.2452	0.431869	3937.73	586.591	12.9123	3.71167	0.587751	0.0386439	0.632757	0.266096	0.243256	2027.33	1148.48	0.255561	642337	7807.86	8.44523	6.27421	0.1697	0.0484169	5.97018	0.710405	0.0708627	0.635511	0.271267	0.635511	n.a.			0.807933	0.560675	0.807933	7.47833	2.48598	1.58444	1.62335	0.241878	0.0254243	3160.39	54.0819	0.602705	549.867	56.7354	0.0167459
2020-09-09	LM-64-76	epithermal	sphalerite		2305.56	155.931	0.279126	3818.03	964.023	9.0667	4.57492	0.426375	0.0547922	0.406032	0.430525	0.406032	801.263	804.104	0.244583	640221	23573.6	11.6599	6.43667	0.861798	0.0693869	5.74346	1.12036	0.0518658	0.552675	0.346284	0.552675	n.a.			0.478719	0.828939	0.472451	5.79019	2.88646	2.40255	1.46707	0.325655	1.86498e-05	3141.17	35.6702	0.723444	341.83	11.4735	0.0104259
2020-09-09	LM-64-78	epithermal	sphalerite		4426.85	109.77	0.330715	3190.85	1053.1	11.6188	0.753364	0.12291	0.0589255	1.11959	0.968024	0.323923	2735.34	2164.12	0.300641	646764	5324.92	8.42091	0.753641	0.287996	0.0615284	0.629677	0.219173	0.0543047	0.492955	0.366824	0.492955	n.a.			0.844128	0.472361	0.844128	5.24781	2.86488	1.7985	7.50211	9.47688	0.0242417	3106.85	56.3237	0.596808	66.6039	2.85146	0.02204
2020-12-02	LM-JB-08-12	epithermal	chalcopyrite		44.5042	13.2151	2.24057	253870	58540.2	70.3155	1.57521	0.996001	0.503716	17.5969	10.1091	2.5098	304771	40751.9	2.58073	29.5014	17.3693	6.38817	2.39291	0.939705	0.304165	2.21315	1.0919	0.177189	3.23569	1.9813	3.23569	1.49725	0.78873	1.49725	1.89857	1.12501	1.42159	45.2334	24.9218	10.5787	1.11495	0.42249	0.203875	2.05095	1.56226	1.64291	0.389143	0.148555	0.00357804
2020-12-02	LM-JB-7D-02	epithermal	chalcopyrite		11.8249	0.695743	1.47619	333617	44694	33.0211	0.121311	0.121926	0.121311	1.55946	0.766355	1.55946	331221	19931.1	1.07949	116.902	37.868	5.4505	0.29249	0.252339	0.198791	0.14266	0.137161	0.14266	2.26282	0.542985	2.26282	0.525717	0.512427	0.525717	0.882123	0.511123	0.882123	7.43632	6.59242	4.613	44.2822	8.83886	0.134177	0.59501	0.953332	0.59501	5.0295	0.887361	0.0340809
2020-12-02	LM-JB-7D-07	epithermal	chalcopyrite		11.8616	1.9787	2.20896	289097	50526.4	59.244	0.237519	0.124001	0.237519	1.55956	1.28373	1.55956	337939	33166.7	1.44215	194.559	69.4871	4.98166	0.384419	0.283192	0.384419	0.531784	0.630239	0.277629	2.61956	2.97027	2.61956	1.02324	0.885701	1.02324	1.87878	0.966103	1.87878	25.7294	12.6551	5.17687	1.39427	1.77942	0.0821844	3.02282	2.66956	1.80342	62.4519	5.52877	0.125018
2020-12-02	LM-JB-7D-18	epithermal	chalcopyrite		12.8766	1.02409	1.39905	378311	32077.9	28.6669	0.241328	0.283337	0.241328	1.05953	0.521847	1.05953	354352	32173.9	1.01029	125.843	87.8394	7.02521	2.44864	0.965609	0.198742	2.28592	0.881894	0.253542	2.57291	2.10251	2.57291	0.669523	0.587348	0.669523	1.09619	0.779942	1.09619	70.9051	24.0782	5.29923	17.1853	18.9296	0.216649	2.63296	1.95316	1.28683	63.5963	6.46338	0.0507042
2020-12-02	LM-JB-7A-02	epithermal	chalcopyrite		12.9507	2.87222	1.14083	285629	61406.3	31.5823	0.184503	0.066558	0.184503	1.58443	1.07593	1.58443	306006	49382.9	1.01728	95.4911	36.4267	7.85624	0.240211	0.32486	0.170866	0.12851	0.22914	0.12851	2.69604	1.57387	1.6112	0.872941	0.195184	0.515165	5.78427	6.24169	1.08576	7.45644	3.29347	7.45644	18.952	8.98299	0.0855859	0.939995	0.775401	0.653893	0.527236	0.253745	0.0227916
2020-12-02	LM--JB-7A-03	epithermal	chalcopyrite		12.655	1.01122	1.21222	294998	33461.9	51.4851	0.263556	0.123955	0.263556	1.84367	1.0834	1.84367	305190	40751.8	1.14511	105.694	39.1674	4.0538	0.345892	0.180521	0.345892	0.277192	0.368582	0.277192	3.39533	2.13131	3.39533	0.648691	0.433923	0.648691	2.95963	3.63032	1.71468	9.42682	4.41635	9.42682	69.1637	47.5062	0.123952	1.22225	0.782756	1.22225	0.349096	0.215388	0.0276704
2020-06-09	LM-33b_X_66	epithermal	chalcopyrite		n.a.			169528	38781.8	61.7016	0.118456	0.0983775	0.118456	0.779085	0.395734	0.779085	212229	36274.2	1.08512	159.054	108.845	8.15555	n.a.			n.a.			n.a.			n.a.			0.894874	0.762655	0.894874	9.79394	7.56742	5.2931	29.1764	2.28394	0.0895383	1.15814	0.659676	0.637449	n.a.
2020-06-09	LM-33b_III_173	epithermal	chalcopyrite		n.a.			219151	41893.7	41.7563	0.107114	0.0411948	0.107114	0.585959	0.515789	0.585959	249724	33893.7	1.16447	381.264	204.365	5.69044	n.a.			n.a.			n.a.			n.a.			0.997379	0.61842	0.997379	5.86207	4.34139	5.86207	53.7882	4.99257	0.0489024	3.67724	1.91144	0.62236	n.a.
2020-06-09	LM-33b_III_174	epithermal	chalcopyrite		n.a.			224132	34837.2	21.8774	0.0806921	0.0657589	0.0806921	0.918867	0.447979	0.918867	289209	74342.5	1.47129	1069.91	1440.19	7.04455	n.a.			n.a.			n.a.			n.a.			0.602861	0.933722	0.602861	6.67998	2.12013	5.57649	72.0064	7.56627	0.0910585	10.3208	7.43244	0.305204	n.a.
2020-06-09	LM-33b_II_101	epithermal	chalcopyrite		n.a.			192852	30692.6	65.8053	0.188679	0.0577101	0.188679	0.781184	0.694129	0.781184	221809	26057.8	1.64347	188.343	71.6249	10.5395	n.a.			n.a.			n.a.			n.a.			0.85402	0.575728	0.85402	2.48818	3.60401	2.48818	21.9053	1.35237	0.062319	4.50072	1.50026	0.670442	n.a.
2020-06-09	LM-33b_IV_149	epithermal	chalcopyrite		n.a.			172814	39643.7	56.8776	0.113409	0.111495	0.113409	0.607018	0.740575	0.607018	205931	33289.4	1.88581	404.952	231.959	7.5773	n.a.			n.a.			n.a.			n.a.			0.885719	0.617633	0.885719	6.96207	3.07968	6.96207	135.641	5.23678	0.0624663	5.58104	3.2658	0.378715	n.a.
2020-06-09	LM-33b_IV_148	epithermal	chalcopyrite		n.a.			237447	70513.8	62.0688	0.14178	0.0656042	0.14178	0.707798	1.5619	0.554038	262155	41712	1.45314	190.593	213.345	7.04559	n.a.			n.a.			n.a.			n.a.			1.25196	0.00173912	1.25196	4.07569	1.55101	4.07569	109.738	8.69811	0.0545698	1.61723	0.600372	0.462236	n.a.
2020-06-09	LM-33b_XI_158	epithermal	chalcopyrite		n.a.			208236	32661.7	56.2528	0.186303	0.090734	0.186303	0.704485	0.390453	0.704485	269179	51427.8	1.65773	1055.24	649.009	10.5612	n.a.			n.a.			n.a.			n.a.			0.614019	0.34003	0.614019	5.66925	2.90897	5.66925	186.625	23.7589	0.142943	12.1901	9.2341	0.444254	n.a.
2020-06-09	LM-33b_XI_161	epithermal	chalcopyrite		n.a.			217685	40145.5	39.1899	0.0693272	0.0584981	0.0693272	1.78098	0.572766	1.78098	251929	27660.1	1.75077	481.809	270.764	8.48175e-05	n.a.			n.a.			n.a.			n.a.			1.14393	0.67228	1.14393	5.47689	4.17269	4.48782	173.663	12.4621	0.0735208	18.2405	23.8334	0.73284	n.a.
2020-06-09	LM-33a_III_284	epithermal	chalcopyrite		n.a.			172866	31929.6	41.2222	0.170726	0.105112	0.170726	0.923577	0.602612	0.923577	218516	31645	1.7794	263.188	246.549	8.22221	n.a.			n.a.			n.a.			n.a.			2.99773	1.83961	1.09364	5.70297	4.10318	5.70297	124.373	9.495	0.083212	2.29447	1.10212	0.451989	n.a.
2020-06-09	LM-33a_III_285	epithermal	chalcopyrite		n.a.			170900	44976.6	91.8195	0.164905	0.229914	0.164905	1.51217	0.776322	1.51217	201019	53674.2	2.48535	69.6768	49.0252	11.7154	n.a.			n.a.			n.a.			n.a.			2.38021	2.71075	1.5195	8.86572	10.8605	7.03852	106.222	8.80906	0.121946	0.77438	0.830911	0.77438	n.a.
2020-06-09	LM-33a_XIII_296	epithermal	chalcopyrite		n.a.			217370	35437	52.426	0.127982	0.111269	0.127982	0.71021	0.782635	0.71021	252866	30736.5	1.50014	2207.89	1841.7	8.13001	n.a.			n.a.			n.a.			n.a.			1.12471	1.28909	1.12471	4.15868	2.24764	4.15868	84.6241	8.51432	0.063061	17.6406	19.6197	0.733674	n.a.
2020-12-02	LM-7D-21	epithermal	galena		0.756164	0.218387	0.329332	8.57401	4.71729	8.57401	0.0812968	0.037086	0.0812968	0.831134	0.42819	0.831134	1.14719	0.666633	0.274102	2.00553	0.995239	2.00553	0.0920126	0.0265097	0.0920126	0.0487995	0.0296994	0.0487995	0.850082	0.203707	0.850082	1.95784	0.401834	0.265258	0.424947	0.118973	0.424947	367.43	48.6722	2.03032	549.197	67.336	0.0458142	47.0764	5.35007	0.301041	0.0940928	0.0419729	0.0139244
2020-12-02	LM-7D-22	epithermal	galena		3.55861	5.23975	0.378432	51.8453	78.161	11.0159	0.0570812	0.0235866	0.0570812	0.681748	0.649897	0.681748	2.96192	1.5581	0.307342	1.64782	2.75083	1.64782	0.0774697	0.0471695	0.0774697	0.0840992	0.0877408	0.0840992	0.796561	0.287109	0.796561	2.68409	0.708567	0.166729	0.39383	0.206038	0.343079	470.043	99.0726	2.58595	468.557	71.6318	0.0283605	47.729	3.7572	0.131654	0.033144	0.0175096	0.0288581
2020-12-02	LM-7A-25	epithermal	galena		10.7645	0.768092	0.348947	13.8635	9.55255	13.8635	0.0938821	0.024688	0.0938821	0.698403	1.10161	0.698403	0.469168	0.434959	0.469168	2.21864	1.58467	2.21864	0.0673403	0.0538041	0.0673403	0.0738467	0.0470734	0.0738467	0.76802	0.243279	0.76802	1.87837	0.428889	0.241688	0.678954	0.564567	0.678954	199.945	19.677	2.56311	328.918	24.0503	0.0275171	63.5853	6.99689	0.250455	0.0271007	0.0270331	0.000309382
2020-12-02	LM-7A-26	epithermal	galena		11.2532	0.882339	0.498674	14.2616	5.15671	14.2616	0.158359	0.04777	0.158359	0.471411	0.454857	0.471411	0.448034	0.360091	0.448034	3.06892	0.842362	3.06892	0.115186	0.0380865	0.115186	0.0582555	0.00220395	0.0582555	0.588959	0.596491	0.588959	3.67587	0.186574	0.319454	0.599219	0.170361	0.599219	512.261	6.89382	2.95509	158.347	1.59019	0.0437651	64.3904	7.3895	0.252714	0.0239267	0.015707	0.0239267
2020-12-02	LM-7A-27	epithermal	galena		5.03597	0.288136	0.340314	11.4639	5.87865	11.4639	0.0545427	0.041885	0.0545427	0.7872	0.126813	0.7872	0.820955	0.394698	0.3512	2.03428	0.993659	2.03428	0.0554916	0.0562257	0.0554916	0.0655401	0.0541093	0.0655401	1.00396	0.392075	1.00396	1.09694	0.140453	0.214182	0.512546	0.269	0.512546	186.702	7.19209	1.4672	397.915	25.3661	0.0499079	45.2159	6.05165	0.321705	0.014592	0.00955371	0.014592
2020-12-02	LM-7A-28	epithermal	galena		10.8143	1.71325	0.546881	13.0474	6.34248	13.0474	0.0557326	0.050802	0.0557326	0.433352	0.326344	0.433352	3.67319	5.67819	0.343115	2.38584	2.11107	2.38584	0.0880908	0.0378304	0.0880908	0.0883492	0.0342567	0.0883492	0.63846	0.348785	0.63846	0.271984	0.151173	0.271984	0.510798	0.324336	0.510798	20.4883	4.63875	4.09814	340.086	27.8963	0.0677008	53.7332	5.06305	0.365466	0.0122234	0.0179723	0.0122234
2020-12-02	LM-7A-29	epithermal	galena		0.788035	1.80661	0.461893	9.8968	12.5662	9.8968	0.0435639	0.039156	0.0435639	0.373172	0.392357	0.373172	0.394901	0.451936	0.394901	1.8088	1.54052	1.8088	0.0567763	0.0304114	0.0567763	0.083369	0.0387577	0.083369	0.874099	1.08537	0.874099	3.20347	0.930337	0.319608	0.497935	0.165612	0.497935	492.709	67.8377	3.24452	360.69	19.4504	0.0361655	36.0526	7.73896	0.154778	0.0149943	0.000333337	0.0149943
2020-12-02	LM-7A-30	epithermal	galena		0.381017	0.196359	0.343083	11.8241	2.61195	11.8241	0.0573735	0.0716011	0.0573735	0.606383	0.289469	0.606383	0.543522	0.699338	0.543522	2.42729	1.27777	2.42729	0.0666873	0.035693	0.0666873	0.127082	0.00189098	0.127082	1.05824	0.536955	1.05824	1.61757	0.56674	0.277535	0.454953	0.00234516	0.454953	306.386	52.3587	2.76739	400.853	43.826	0.0415245	37.6853	2.3774	0.278727	0.0239033	0.0253142	0.0239033
2020-12-02	LM-6A-19	epithermal	galena		0.39464	0.170677	0.39464	13.0403	17.5391	13.0403	0.0834419	0.0353292	0.0834419	0.604865	0.201746	0.604865	0.519583	0.34234	0.519583	2.90301	0.0435209	2.90301	0.0540426	0.0473463	0.0540426	0.117017	0.000752088	0.117017	1.30765	0.00371068	1.30765	1.2494	0.0388732	0.307126	0.334759	0.570699	0.334759	181.709	8.07515	1.53639	223.898	16.4037	0.0496724	30.7133	4.50806	0.340841	0.0165255	0.0349365	0.0104727
2020-12-02	LM-6A-20	epithermal	galena		0.516963	0.343447	0.516963	13.9095	4.26088	13.9095	0.0891793	0.111853	0.0891793	0.604309	5.0827e-05	0.604309	0.537285	0.406893	0.537285	3.22538	0.0153054	3.22538	0.126267	0.0488162	0.126267	0.138707	0.000169582	0.138707	1.24236	0.000178201	1.24236	2.51916	0.0957517	0.343515	0.503102	0.585574	0.503102	328.415	3.48384	6.42865	133.637	1.24446	0.0281798	41.7581	1.83667	0.306992	0.000663158	0.000124572	0.000663158
2020-06-09	LM27B_III_55	epithermal	galena		n.a.			14.3382	13.1195	14.3382	0.0560262	0.0100199	0.0560262	0.306373	0.223608	0.306373	0.92879	0.701238	0.92879	4.55467	1.2967	4.55467	n.a.			n.a.			n.a.			n.a.			0.613489	0.364904	0.414833	313.488	25.7698	2.24711	219.512	26.8203	0.0438626	40.2743	8.63408	0.278674	n.a.
2020-06-09	LM27B_VII_90	epithermal	galena		n.a.			13.982	10.9426	13.982	0.0561001	0.0692798	0.0194066	0.209995	0.110314	0.209995	18.3819	33.884	0.478913	659.444	1313.18	3.26579	n.a.			n.a.			n.a.			n.a.			0.165561	0.202342	0.165561	280.627	13.0122	1.18566	325.804	29.56	0.0231967	46.766	11.3977	0.163168	n.a.
2020-06-09	LM27B_XIII_85	epithermal	galena		n.a.			88.5873	64.7435	12.0861	0.19936	0.217548	0.0345818	0.215601	0.251788	0.215601	605.046	704.675	0.372867	207.256	244.429	3.48902	n.a.			n.a.			n.a.			n.a.			15.3847	17.0487	0.345736	284.363	22.1832	1.26628	318.21	31.0996	0.0156967	44.188	4.60403	0.182355	n.a.
2020-06-09	LM33b_III_177	epithermal	galena		n.a.			38.8495	54.8125	9.48947	0.0304288	0.0706614	0.0304288	0.212284	0.295961	0.212284	0.380775	0.475613	0.375709	2.15021	1.58887	2.15021	n.a.			n.a.			n.a.			n.a.			0.373451	0.228061	0.245174	305.798	34.9702	1.39478	588.77	166.901	0.0166696	33.5749	2.92712	0.167983	n.a.
2020-06-09	LM33b_VI_127	epithermal	galena		n.a.			11.1221	7.36214	11.1221	0.0240121	0.01698	0.0240121	0.181236	0.135655	0.181236	0.467409	0.585534	0.467409	2.79828	1.13328	2.79828	n.a.			n.a.			n.a.			n.a.			0.184126	0.167036	0.184126	159.358	11.5676	1.81104	708.292	72.8278	0.0152853	43.0029	4.26221	0.168619	n.a.
2020-06-09	LM33b_II_98	epithermal	galena		n.a.			8.76246	6.35723	8.76246	0.0306195	0.0133765	0.0306195	0.189381	0.126271	0.189381	0.363804	0.591478	0.288015	2.2333	1.83564	2.2333	n.a.			n.a.			n.a.			n.a.			0.216107	0.21593	0.216107	374.917	27.4457	1.23846	616.61	135.037	0.0285081	51.0953	3.28304	0.091988	n.a.
2020-06-09	LM33b_IV_145	epithermal	galena		n.a.			7.93896	9.15502	7.93896	0.0304905	0.0222084	0.0304905	0.149421	0.126265	0.149421	0.29741	0.335681	0.29741	3.815	0.974217	3.815	n.a.			n.a.			n.a.			n.a.			0.248408	0.165763	0.248408	389.169	30.1482	1.50471	743.907	134.756	0.0140575	55.4467	5.63591	0.0976409	n.a.
2020-06-09	LM33a_II_260	epithermal	galena		n.a.			7.90378	11.481	7.90378	0.0240577	0.0236221	0.0240577	0.167162	0.0866279	0.167162	0.387836	0.19227	0.387836	2.68518	1.52384	2.68518	n.a.			n.a.			n.a.			n.a.			0.208133	0.147318	0.208133	528.634	42.8179	1.00708	348.392	26.9531	0.0223788	34.867	2.99907	0.121333	n.a.
2020-06-09	LM33a_III_288	epithermal	galena		n.a.			24.1371	15.5812	12.261	0.0336013	0.013044	0.0336013	0.174771	0.159375	0.174771	0.443398	0.465546	0.443398	2.49931	1.62839	2.49931	n.a.			n.a.			n.a.			n.a.			0.192275	0.108264	0.192275	282.969	12.9914	1.13504	307.636	23.6674	0.0233204	32.473	2.63832	0.118234	n.a.
[truncated: 27 more columns]

## Sheet: 2020-06-09
	Start time	S33 [ppm]	Fe57 [ppm]	Co59 [ppm]	Ni60 [ppm]	Cu63 [ppm]	Zn67 [ppm]	As75 [ppm]	Se77 [ppm]	Ag109 [ppm]	Cd111 [ppm]	Sb121 [ppm]	Te125 [ppm]	Au197 [ppm]	Tl205 [ppm]	Pb208 [ppm]	Bi209 [ppm]
FeS1
	2020-06-09 09:46:21	444850	481678	583.935	26407.9	22013	244.843	1561.4	377.278	143.981	1.87732	92.8699	195.934	49.6235	0.131571	86.9143	134.108
	2020-06-09 09:47:21	437833	457184	562.113	26169.8	24498.6	275.664	1734.48	371.774	142.422	2.3883	106.912	185.854	68.8172	0.211522	95.3609	141.84
	2020-06-09 09:50:22	442556	451372	575.071	25853.8	22429.4	269.731	1575.29	370.562	154.412	1.91806	101.306	195.131	61.5193	0.241728	90.5097	119.003
	average	441746	463411	573.706	26143.8	22980.3	263.412	1623.73	373.205	146.938	2.06123	100.363	192.306	59.9867	0.19494	90.9283	131.65
	STD	2921.22	13132.6	8.96069	226.956	1086.91	13.3523	78.522	2.92231	5.32304	0.231874	5.77132	4.5743	7.91041	0.0464749	3.46099	9.48367
	RSD	0.661289	2.83391	1.56189	0.868107	4.72975	5.06899	4.83592	0.783032	3.62263	11.2493	5.75047	2.37865	13.1869	23.8406	3.80629	7.20367
MASS-1
	2020-06-09 09:27:21	280128	162313	61.3058	98.1128	144688	215452	68.5446	54.2831	53.2072	60.8366	61.8228	14.9278	36.4908	53.9232	75.4652	62.8387
	2020-06-09 09:29:21	276922	154298	61.0622	99.9326	139043	209776	62.8637	50.1289	49.4758	58.8267	59.2017	14.4756	46.6659	49.8118	68.2694	59.9299
	2020-06-09 09:32:21	263781	123225	46.2335	76.1031	99583.6	168032	53.4564	43.3226	39.3525	53.473	48.2147	13.6878	27.3939	36.2776	53.1289	47.9478
	2020-06-09 09:33:21	276048	164974	62.0167	103.08	134828	216158	68.4172	51.4125	50.0357	62.5383	62.8358	15.5269	35.6409	52.3148	72.3848	61.8406
	2020-06-09 11:20:22	271408	131237	51.1018	81.1275	116296	180345	56.0521	46.6575	42.6642	51.8709	51.7842	11.486	32.0205	38.9938	55.9072	49.3406
	2020-06-09 11:22:21	277946	153612	57.0663	93.9892	132871	220532	64.7889	56.4954	51.9067	54.1943	58.4215	16.4136	58.8093	52.1955	69.4271	62.8101
	2020-06-09 11:23:21	276547	134005	52.801	86.8214	108655	189988	57.0162	51.5997	40.7	50.8754	53.0948	13.4417	37.1479	39.6033	61.0647	52.9956
	2020-06-09 11:51:21	275330	157955	59.0216	104.684	122301	201999	61.2556	44.8196	49.7174	61.9561	56.7242	14.5005	57.8357	52.5312	69.4067	61.6696
	2020-06-09 11:53:22	277590	154758	64.7884	102.307	151216	207214	64.2045	56.0601	52.4196	62.4514	58.5507	15.7875	47.3646	51.2543	65.8	64.8598
	2020-06-09 17:30:21	267499	156829	55.3579	94.672	123590	210827	63.9678	48.6244	50.7512	57.6253	62.8116	14.6107	38.5362	46.7906	63.835	59.5204
	2020-06-09 17:32:21	277184	179692	67.4503	106.124	135596	216429	72.8389	55.3546	53.6299	59.1659	67.5035	15.4004	41.8604	53.7904	73.9802	62.4827
	2020-06-09 17:33:21	272321	136747	52.6977	90.1682	122644	194048	57.1741	45.1518	44.324	55.3291	55.195	12.616	36.883	44.0941	61.6646	51.1636
	2020-06-09 17:35:24	291775	144788	52.1995	86.9522	121529	190347	62.5061	43.6009	43.7665	61.3843	57.1957	13.9827	59.4417	46.6838	66.5631	59.2919
	2020-06-09 17:36:21	279157	159761	61.7251	105.189	141519	220164	68.5066	53.2657	52.0791	61.1852	61.2849	15.8754	41.2682	49.5862	68.025	61.6535
	average	275974	151014	57.4877	94.9474	128168	202951	62.9709	50.0555	48.145	57.9794	58.1886	14.4809	42.6685	47.7036	66.0658	58.4532
	STD	6218.28	14711.5	5.76785	9.17949	13864.1	15542.6	5.37984	4.55181	4.74166	3.94896	4.87175	1.30788	9.73883	5.65688	6.22384	5.3978
	RSD	2.25321	9.74182	10.0332	9.66797	10.8171	7.6583	8.54338	9.09354	9.8487	6.81097	8.37234	9.03177	22.8244	11.8584	9.42066	9.23439
PO724
	2020-06-09 09:38:21	420085	599520	6.74677	3.72163	11.2444	BelowLOD	BelowLOD	BelowLOD	BelowLOD	BelowLOD	BelowLOD	BelowLOD	46.1821	BelowLOD	BelowLOD	0.0438308
	2020-06-09 09:41:22	403263	653286	6.08272	4.55767	12.3339	BelowLOD	BelowLOD	5.81447	BelowLOD	BelowLOD	BelowLOD	BelowLOD	51.7961	BelowLOD	BelowLOD	0.0333975
	2020-06-09 09:44:21	407670	642966	7.11196	4.18086	13.4691	BelowLOD	BelowLOD	BelowLOD	BelowLOD	BelowLOD	BelowLOD	BelowLOD	38.428	BelowLOD	BelowLOD	BelowLOD
	2020-06-09 11:15:22	420685	656699	6.54355	3.31148	10.6519	BelowLOD	BelowLOD	BelowLOD	0.175694	BelowLOD	BelowLOD	BelowLOD	46.1623	BelowLOD	BelowLOD	BelowLOD
	2020-06-09 11:18:22	429709	682749	7.51538	3.31678	11.6637	BelowLOD	BelowLOD	BelowLOD	0.165606	BelowLOD	BelowLOD	BelowLOD	54.1069	BelowLOD	BelowLOD	BelowLOD
	2020-06-09 17:22:21	400682	684999	6.94354	5.10081	13.6206	BelowLOD	BelowLOD	BelowLOD	0.200279	BelowLOD	BelowLOD	BelowLOD	43.2092	BelowLOD	BelowLOD	0.0363764
	2020-06-09 17:23:25	421676	671769	6.91256	3.08329	14.5573	BelowLOD	BelowLOD	BelowLOD	0.248757	BelowLOD	BelowLOD	BelowLOD	44.7026	BelowLOD	BelowLOD	BelowLOD
	2020-06-09 17:24:21	430479	698900	7.09052	3.95273	12.8357	BelowLOD	BelowLOD	BelowLOD	0.162875	BelowLOD	BelowLOD	BelowLOD	46.6023	BelowLOD	BelowLOD	BelowLOD
	2020-06-09 17:26:21	394538	712973	6.76102	3.93883	11.8773	BelowLOD	1.29261	BelowLOD	BelowLOD	BelowLOD	BelowLOD	BelowLOD	47.3893	BelowLOD	BelowLOD	BelowLOD
	2020-06-09 17:27:21	391270	703594	7.26876	3.16092	12.5121	BelowLOD	BelowLOD	BelowLOD	0.205179	BelowLOD	BelowLOD	BelowLOD	52.257	BelowLOD	BelowLOD	BelowLOD
	average	412006	670746	6.89768	3.8325	12.4766		1.29261	5.81447	0.193065				47.0836			0.0378683
	STD	13591.8	32171.5	0.378906	0.619973	1.12433		0	0	0.0296299				4.42588			0.00438807
	RSD	3.29894	4.79638	5.49324	16.1767	9.01153		0	0	15.3471				9.40005			11.5877

## Sheet: 2020-09-09_std
	Start time	Si29 [ppm]	S33 [ppm]	Mn55 [ppm]	Fe57 [ppm]	Co59 [ppm]	Ni60 [ppm]	Cu63 [ppm]	Zn67 [ppm]	Ga69 [ppm]	Ga71 [ppm]	Ge73 [ppm]	As75 [ppm]	Se77 [ppm]	Ag109 [ppm]	Cd111 [ppm]	In115 [ppm]	Sn118 [ppm]	Sb121 [ppm]	Te125 [ppm]	Au197 [ppm]	Tl205 [ppm]	Pb208 [ppm]	Bi209 [ppm]
FeS1
	2020-09-09 09:39:26	25596.9	405515	58.8641	396425	516.154	24823.1	20518.4	337.037	22.7132	9.281	3.58439	1204.15	352.202	110.42	1.77873	9.77885	141.581	71.2282	155.549	38.8702	0.211024	95.386	121.948
	2020-09-09 09:40:26	25764	409362	45.9625	399421	524.581	23981.8	20569.4	163.289	20.5912	8.35445	3.68998	1245.22	361.259	113.137	2.18336	7.84312	148.405	65.2455	165.7	50.6144	0.153526	87.369	110.34
	2020-09-09 09:42:26	25715.7	408649	60.1905	424366	563.901	25879.9	19949.8	231.076	25.2153	9.17344	3.75178	1806.77	356.235	174.915	2.9364	9.86478	235.02	108.52	181.764	69.5495	0.143671	112.532	137.036
	average	25692.2	407842	55.0057	406737	534.879	24894.9	20345.9	243.801	22.8399	8.9363	3.67538	1418.71	356.565	132.824	2.2995	9.16225	175.002	81.6645	167.671	53.0114	0.169407	98.4289	123.108
	STD	70.2383	1670.96	6.41739	12525.5	20.808	776.544	280.808	71.5004	1.88991	0.413768	0.0691119	274.913	3.70498	29.7834	0.479701	0.933423	42.5306	19.1459	10.7926	12.6389	0.0297016	10.4956	10.9297
	RSD	0.273384	0.409708	11.6668	3.07951	3.89023	3.11929	1.38017	29.3274	8.27463	4.63019	1.8804	19.3776	1.03907	22.4232	20.8611	10.1877	24.3029	23.4446	6.43675	23.8419	17.5327	10.6631	8.87817
MASS-1
	2020-09-09 09:32:25	291.342	276190	300.859	143995	63.3386	106.004	128606	222155	55.8067	57.2527	54.0792	61.0868	43.5685	45.2949	47.9516	45.3873	53.3846	59.0296	11.7522	46.7313	40.9905	58.1394	50.2333
	2020-09-09 09:33:23	368.346	272289	282.855	159104	63.1951	99.0998	131784	213952	62.0846	64.3376	47.4459	61.009	52.4982	47.0156	58.0724	51.6839	54.4877	56.2256	14.58	44.3112	51.6863	68.2134	55.6568
	2020-09-09 09:34:24	13465.2	276486	256.851	135123	55.3396	93.8361	127208	189476	62.6864	58.4087	45.2807	64.0806	46.8205	46.6592	52.7417	50.9941	57.8508	56.7717	13.8722	40.3913	47.1447	61.057	59.7262
	2020-09-09 09:36:26	526.805	277147	274.451	185584	56.8082	85.8086	150389	208401	78.027	78.3289	53.1381	77.1992	63.4106	60.3581	77.7231	51.2379	72.3291	68.9524	19.2645	73.7293	62.1365	88.5062	75.8858
	2020-09-09 13:19:25	282.504	277915	276.31	154557	61.0187	100.826	136748	210780	60.4919	60.5113	56.2106	59.403	47.8879	52.2949	62.2568	49.9376	55.9258	57.9646	15.7039	48.0647	47.3858	63.0391	57.9343
	2020-09-09 13:21:27	172.253	278380	294.13	158445	61.7607	99.9474	126983	222266	61.9711	62.6791	43.8468	63.0809	49.3359	49.2595	66.2364	51.7341	57.8293	60.0421	15.537	74.8331	48.6925	65.1005	59.1039
	2020-09-09 16:28:25	233.599	270833	285.481	151608	60.4596	101.246	135899	205252	63.125	61.3921	51.4714	70.9322	50.3959	53.5303	55.3304	42.8302	60.7587	59.9098	14.9117	46.9099	49.8029	59.0741	61.8103
	2020-09-09 16:31:24	234.541	275017	266.646	155630	58.3208	91.8778	134990	204947	64.3525	64.3845	46.9775	60.8467	52.8489	45.5023	58.589	54.9999	56.442	57.5944	14.8721	41.4704	50.2155	77.0585	58.8158
	2020-09-09 16:33:22	207.139	279744	282.415	159953	59.7588	94.3532	133394	212772	67.4577	68.7052	51.5485	67.3712	52.2336	50.0853	61.0817	51.1949	61.9919	63.5097	14.5062	40.3699	51.9482	71.8158	60.8345
	average	1753.52	276000	280	156000	60	97	134000	210000	64.0003	64	49.9999	65.0011	51	50	59.9981	50	59	60	15	50.7568	50.0003	68.0004	60.0001
	STD	4141.89	2715.68	12.6376	12944.1	2.59248	5.72855	6753.56	9392.59	5.75954	6.0113	4.0196	5.51744	5.2358	4.57054	8.05966	3.45571	5.37781	3.77142	1.86293	12.8615	5.29032	9.28137	6.47331
	RSD	236.204	0.983943	4.51342	8.29754	4.32081	5.90572	5.03997	4.47266	8.99923	9.39266	8.03923	8.48823	10.2663	9.14108	13.4332	6.91142	9.11493	6.2857	12.4195	25.3395	10.5806	13.649	10.7888
PO724
	2020-09-09 09:14:23	BelowLOD	408958	27.3806	620057	6.65733	4.59211	9.97681	BelowLOD	BelowLOD	0.149089	2.63225	BelowLOD	BelowLOD	0.137608	BelowLOD	BelowLOD	BelowLOD	BelowLOD	BelowLOD	48.7256	BelowLOD	BelowLOD	BelowLOD
	2020-09-09 09:15:22	627.533	382014	26.3275	628362	7.25744	4.84872	11.9973	BelowLOD	0.289813	BelowLOD	3.72243	3.03522	BelowLOD	BelowLOD	BelowLOD	BelowLOD	BelowLOD	BelowLOD	BelowLOD	47.2238	BelowLOD	BelowLOD	BelowLOD
	2020-09-09 09:16:22	545.945	391942	26.7337	617668	7.39315	3.84967	9.94819	BelowLOD	BelowLOD	0.148457	5.70162	BelowLOD	BelowLOD	BelowLOD	BelowLOD	BelowLOD	BelowLOD	BelowLOD	BelowLOD	42.3547	BelowLOD	BelowLOD	BelowLOD
	2020-09-09 13:14:24	BelowLOD	389435	42.4656	685187	8.82927	3.72771	13.3874	BelowLOD	BelowLOD	0.31915	BelowLOD	BelowLOD	BelowLOD	0.165139	BelowLOD	BelowLOD	BelowLOD	BelowLOD	0.270948	45.0089	0.0393595	BelowLOD	0.0318463
	2020-09-09 13:16:23	BelowLOD	406083	39.9849	718284	7.3803	3.74819	12.6079	BelowLOD	BelowLOD	BelowLOD	2.45154	BelowLOD	BelowLOD	BelowLOD	BelowLOD	BelowLOD	BelowLOD	BelowLOD	BelowLOD	57.8558	BelowLOD	BelowLOD	BelowLOD
	2020-09-09 13:17:23	BelowLOD	418025	35.824	666418	6.79028	4.19746	10.0486	BelowLOD	BelowLOD	0.348966	BelowLOD	BelowLOD	BelowLOD	0.0601966	BelowLOD	BelowLOD	BelowLOD	BelowLOD	BelowLOD	46.8632	BelowLOD	BelowLOD	BelowLOD
	2020-09-09 16:19:23	BelowLOD	399169	36.8102	677190	7.0557	3.75369	12.2192	BelowLOD	BelowLOD	BelowLOD	3.72294	BelowLOD	BelowLOD	BelowLOD	BelowLOD	BelowLOD	BelowLOD	BelowLOD	BelowLOD	57.3138	BelowLOD	0.0847263	BelowLOD
	2020-09-09 16:21:23	BelowLOD	413981	38.6058	670450	6.57906	3.88945	12.2955	BelowLOD	BelowLOD	BelowLOD	BelowLOD	BelowLOD	BelowLOD	BelowLOD	BelowLOD	BelowLOD	BelowLOD	BelowLOD	BelowLOD	43.9956	BelowLOD	BelowLOD	BelowLOD
	2020-09-09 16:22:23	BelowLOD	387964	35.4707	701378	6.21489	4.51173	10.3103	BelowLOD	BelowLOD	BelowLOD	BelowLOD	BelowLOD	BelowLOD	0.0802923	BelowLOD	BelowLOD	BelowLOD	BelowLOD	BelowLOD	33.3422	BelowLOD	BelowLOD	BelowLOD
	2020-09-09 16:23:23	BelowLOD	420552	35.6238	688490	6.27069	5.04352	11.1991	BelowLOD	0.398077	BelowLOD	2.91944	BelowLOD	BelowLOD	0.294385	BelowLOD	BelowLOD	BelowLOD	BelowLOD	BelowLOD	41.3775	BelowLOD	BelowLOD	BelowLOD
	2020-09-09 16:25:23	BelowLOD	420120	36.7566	676804	7.19434	1.90911	11.758	BelowLOD	BelowLOD	0.514164	BelowLOD	BelowLOD	BelowLOD	BelowLOD	BelowLOD	BelowLOD	BelowLOD	BelowLOD	BelowLOD	56.2254	BelowLOD	0.217137	BelowLOD
	average	545.945	405252	36.475	677986	7.07863	3.84784	11.5305		0.398077	0.332684	3.69889			0.150003					0.270948	47.1486	0.0393595	0.150931	0.0318463
	STD	0	12729.9	4.08232	26170.8	0.745364	0.801821	1.15559		0	0.129733	1.24247			0.0921955					0	7.90125	0	0.0662051	0
	RSD	0	3.14122	11.1921	3.86008	10.5298	20.8382	10.0221		0	38.996	33.5904			61.4624					0	16.7582	0	43.8644	0

## Sheet: 2020-12-02_std
	Start time	S33 [ppm]	Mn55 [ppm]	Fe57 [ppm]	Co59 [ppm]	Ni60 [ppm]	Cu63 [ppm]	Zn67 [ppm]	Ga69 [ppm]	Ga71 [ppm]	Ge73 [ppm]	Ge74 [ppm]	As75 [ppm]	Se77 [ppm]	Ag109 [ppm]	Cd111 [ppm]	In115 [ppm]	Sn118 [ppm]	Sb121 [ppm]	Te125 [ppm]	W182 [ppm]	Au197 [ppm]	Hg202 [ppm]	Tl205 [ppm]	Pb208 [ppm]	Bi209 [ppm]
FeS1
	2020-12-02 09:53:21	254288	45.659	374772	382.67	22816.1	16675.8	155.834	16.5231	7.02729	1.8287	2.62556	815.588	242.141	86.7654	1.82537	6.25558	201.416	47.0269	107.494	683.08	29.5366	6.66846	0.153716	83.1429	73.6749
	2020-12-02 09:54:21	260178	39.0173	323479	372.337	25303.7	14403.7	214.375	13.5758	5.60882	bld	3.22077	778.074	212.341	205.034	1.1592	4.81992	91.3593	45.4507	95.2031	542.811	25.9651	4.02167	0.128647	49.7029	64.2649
	2020-12-02 09:56:20	246855	50.7982	363901	378.191	22090.8	15800.9	153.991	20.5028	7.00137	2.3367	3.009	913.557	236.596	101.788	2.26074	6.98771	133.477	65.5652	130.628	412.15	27.6716	3.32979	0.0926482	68.635	76.0836
	average	253774	45.1582	354051	377.733	23403.5	15626.8	174.733	16.8672	6.54583	2.0827	2.95178	835.74	230.36	131.196	1.74844	6.02107	142.084	52.6809	111.109	546.014	27.7245	4.67331	0.125004	67.1603	71.3411
	STD	5451.34	4.82253	22068.3	4.23102	1375.84	935.703	28.0408	2.83836	0.662648	0.254002	0.246341	57.1165	12.9405	52.5703	0.452981	0.900398	45.3407	9.13327	14.6863	110.63	1.45855	1.43879	0.0250635	13.6916	5.09935
	RSD	2.14811	10.6792	6.23309	1.12011	5.87879	5.98781	16.0478	16.8276	10.1232	12.1958	8.34552	6.83424	5.61753	40.0702	25.9077	14.9541	31.9112	17.337	13.218	20.2614	5.26087	30.7873	20.0502	20.3864	7.14784
MASS-1
	2020-12-02 09:32:21	277450	266.27	139280	57.6342	94.7127	130738	198963	57.2519	59.2011	46.2082	45.042	64.3874	48.3898	46.9452	59.9316	42.4914	52.7738	56.1017	15.0139	20.198	36.1242	52.0971	45.3188	62.2075	56.1803
	2020-12-02 09:35:21	274826	302.889	170442	63.3481	102.697	131237	217722	66.4342	67.664	50.6849	51.7621	66.267	51.0342	50.7957	59.9578	53.5162	60.6436	61.9638	16.1277	20.4569	38.1193	60.3007	54.1509	75.7685	60.6002
	2020-12-02 09:37:21	275247	271.281	162373	59.2735	95.5722	137746	214722	63.3833	63.7737	50.6033	49.157	60.7569	53.2496	50.7609	58.3724	54.206	60.543	59.5665	13.1705	19.3384	38.8845	54.2403	52.6268	72.2628	60.8312
	2020-12-02 10:45:21	276673	278.957	154663	59.6601	98.1599	153941	213028	63.1137	63.7996	50.3492	51.2998	68.0318	58.0201	58.2899	66.1405	50.1144	59.4246	60.7849	16.0204	19.369	48.945	56.119	50.9093	68.424	62.5111
	2020-12-02 13:20:21	275519	276.152	151379	58.369	93.8808	129145	197955	63.0152	62.7585	49.18	49.5237	63.0144	49.3561	49.2624	58.4231	49.3516	57.7929	58.864	14.0354	20.1253	40.6925	56.4627	48.9922	66.2634	57.696
	2020-12-02 15:46:21	276781	296.344	149638	62.5541	97.5914	138732	207134	64.6109	64.7103	69.79	70.2284	66.9247	46.654	49.7879	60.5728	47.7643	59.9975	63.9906	15.6491	21.5681	67.1343	54.7459	49.9934	71.9618	61.2923
	2020-12-02 15:48:21	273188	269.416	145319	59.0078	91.5782	125629	204572	66.3658	64.3682	48.6364	47.9244	62.0804	48.7116	45.5142	52.9906	45.3304	58.3914	57.5517	15.6171	18.4811	52.9725	58.3224	48.7018	66.5537	56.9279
	2020-12-02 15:49:21	277188	271.441	148564	58.0045	92.8685	134703	210583	63.071	63.2399	49.7173	49.6369	64.4501	56.1751	51.7937	65.8369	52.3082	58.4419	58.6513	14.1787	19.8	55.0086	56.3972	50.8047	63.7018	59.3448
	2020-12-02 15:50:21	274590	297.48	171598	61.8229	103.556	137941	213779	63.7382	64.9492	49.6631	50.294	67.2173	55.4541	51.9384	62.8575	51.9077	59.7072	60.8237	16.4239	21.218	58.8157	59.4998	50.0544	69.0037	61.481
	average	275718	281.137	154806	59.9638	96.7352	135535	208718	63.4427	63.8294	51.6481	51.652	64.7922	51.8938	50.5654	60.5648	49.6656	58.6351	59.8109	15.1374	20.0616	48.5218	56.465	50.1725	68.4608	59.6516
	STD	1330.48	13.1261	10499.7	1.96954	3.94353	7751.83	6628.93	2.53211	2.1067	6.54265	6.82696	2.3612	3.76259	3.40058	3.82494	3.6762	2.27214	2.24207	1.05012	0.904013	10.1683	2.46037	2.35594	4.09102	2.1054
	RSD	0.482551	4.66896	6.7825	3.28455	4.07662	5.71944	3.17603	3.99118	3.30052	12.6678	13.2172	3.64427	7.25056	6.72511	6.31545	7.4019	3.87506	3.7486	6.93728	4.50618	20.9561	4.35733	4.69567	5.97572	3.5295
PO724
	2020-12-02 09:44:25	401643	15.3035	679077	6.91939	2.56487	7.48859	bld	bld	0.466011	5.79245	1.52953	bld	bld	bld	bld	bld	1.1823	bld	bld	bld	49.1648	bld	bld	bld	bld
	2020-12-02 09:47:22	346181	15.3763	578679	6.55361	3.82717	7.31268	bld	bld	bld	bld	1.45451	bld	bld	bld	bld	bld	bld	bld	bld	bld	29.8401	bld	bld	0.381085	bld
	2020-12-02 09:50:24	365972	16.2869	597723	4.96231	4.58169	7.79455	11.4581	bld	0.356948	bld	bld	bld	bld	bld	bld	bld	bld	bld	bld	bld	50.2095	bld	bld	bld	bld
	2020-12-02 10:22:24	401329	28.1748	821965	8.7397	4.24102	10.9379	bld	bld	bld	bld	bld	bld	bld	bld	bld	bld	bld	bld	bld	bld	48.9851	bld	bld	bld	bld
	2020-12-02 13:25:29	360894	24.2056	653734	6.41273	5.31478	7.41514	bld	bld	bld	bld	bld	bld	bld	bld	bld	bld	bld	bld	bld	bld	47.363	bld	bld	bld	bld
	2020-12-02 13:47:21	383496	37.3419	907662	7.40735	bld	13.8941	bld	bld	bld	bld	1.86505	bld	bld	bld	bld	bld	bld	bld	bld	bld	39.8146	bld	bld	bld	bld
	2020-12-02 15:40:21	407566	42.147	956953	10.0138	4.08722	13.1683	bld	0.318238	0.420345	bld	bld	bld	bld	bld	bld	bld	bld	bld	bld	bld	84.4871	bld	bld	bld	bld
	2020-12-02 15:41:22	415270	36.1852	879583	9.53232	5.87866	11.8388	bld	bld	bld	bld	bld	bld	bld	bld	bld	bld	bld	bld	bld	bld	46.8338	bld	bld	bld	bld
	2020-12-02 15:42:23	413460	34.174	827805	6.77793	7.06001	10.2241	bld	0.295992	0.352899	bld	bld	bld	bld	bld	bld	bld	bld	bld	bld	0.330761	52.1707	bld	bld	bld	bld
	2020-12-02 15:45:23	382791	31.0017	719239	5.56488	bld	9.05997	bld	bld	0.272078	bld	bld	bld	bld	bld	bld	0.054676	bld	bld	bld	bld	40.7118	bld	bld	bld	bld
	average	387860	28.0197	762242	7.2884	4.69443	9.91341	11.4581	0.307115	0.373656	5.79245	1.61636					0.054676	1.1823			0.330761	48.9581			0.381085
	STD	22703.6	9.34726	127277	1.57061	1.28731	2.35364	0	0.011123	0.0659354	0	0.178493					0	0			0	13.4105			0
	RSD	5.85355	33.3596	16.6977	21.5495	27.4221	23.742	0	3.62178	17.646	0	11.0429					0	0			0	27.3917			0
