# Supplementary material for: In-situ trace element and S isotope systematics in pyrite from three porphyry-epithermal prospects, Limnos Island, Greece
Source: Frontiers journal article supplement (doi:10.3389/feart.2022.916107), 2022-10-10
Supplement: Table_5.XLSX [file Table_5.XLSX]

## Sheet: all
Table A5: All LA-ICP-MS results, including limits of detection and uncertainties.
sample ID	loc	type	subtype	mineral	texture	Mn (ppm)	Fe (ppm)	Co (ppm)	Ni (ppm)	Cu (ppm)	Zn (ppm)	Ga (ppm)	Ge (ppm)	As (ppm)	Se (ppm)	Ag (ppm)	Cd (ppm)	In (ppm)	Sn (ppm)	Sb (ppm)	Te (ppm)	Au (ppm)	Tl (ppm)	Pb (ppm)	Bi (ppm)	Co/Ni (ppm)	Se/Pb (ppm)	Bi/Pb (ppm)	Co/As (ppm)	Tl/Pb (ppm)	Sb/Pb (ppm)	Ag/Co (ppm)	Ag/Pb (ppm)	Bi/Co (ppm)	Se/Co (ppm)	Tl/Co (ppm)	Sb/Co (ppm)	Ag/Co (ppm)			Mn L.O.D. Howell	Fe L.O.D. Howell	Co L.O.D. Howell	Ni L.O.D. Howell	Cu L.O.D. Howell	Zn L.O.D. Howell	Ga L.O.D. Howell	Ge L.O.D. Howell	As L.O.D. Howell
LM-JB-03-01	Fakos	epithermal	transitional	pyrite	euhedral	16.014	506180	496.209	189.348	12.1017	0.998927	0.0623608	0.568709	532.467	100.887	0.0290871	0.136548	0.0108623	0.109964	0.051584	23.3743	0.0149241	0.019782	10.5668	2.00867	2.62061	9.54753	0.190092	0.931905	0.00187208	0.00488169	5.86186e-05	0.00275267	0.00404803	0.203316	3.98663e-05	0.000103956	5.86186e-05			0.218973	10.3753	0.0269157	0.258888	0.175972	0.998927	0.0623608	0.34962	0.243839
LM-JB-03-02	Fakos	epithermal	transitional	pyrite	euhedral	16.0743	468838	296.726	167.167	4.55879	1.44955	0.0535802	0.486989	1041.89	199.174	0.0200791	0.235825	0.00744728	0.139919	0.045639	7.09645	0.0332366	0.0110894	4.14054	0.904979	1.77503	48.1035	0.218566	0.284795	0.00267825	0.0110225	6.76686e-05	0.00484939	0.00304988	0.671239	3.73725e-05	0.000153808	6.76686e-05			0.331777	9.59622	0.0514392	0.378407	0.307671	1.44955	0.0535802	0.486989	0.380672
LM-JB-03-03	Fakos	epithermal	transitional	pyrite	euhedral	16.9628	479187	219.892	122.022	3.45383	1.29193	0.0344076	0.698271	916.034	114.637	0.0691368	0.141533	0.0056306	0.365042	0.47856	69.0829	0.344386	0.0210496	37.4402	5.47897	1.80207	3.06185	0.146339	0.240048	0.000562218	0.012782	0.000314413	0.00184659	0.0249166	0.521332	9.5727e-05	0.00217635	0.000314413			0.156371	9.75204	0.0322224	0.367912	0.231162	1.29193	0.0344076	0.352353	0.206153
LM-JB-03-04	Fakos	epithermal	transitional	pyrite	euhedral	16.2108	505920	146.634	83.4375	0.299545	1.25361	0.0367376	0.494048	914.964	368.711	0.0181868	0.251385	0.0180579	0.0919792	0.058363	1.21558	0.000552272	0.0125969	0.174241	0.0372547	1.75741	2116.1	0.213811	0.160262	0.072296	0.334956	0.000124029	0.104378	0.000254066	2.5145	8.59072e-05	0.000398019	0.000124029			0.21996	4.91956	0.0220747	0.327981	0.221498	1.25361	0.0367376	0.494048	0.243834
LM-JB-03-05	Fakos	epithermal	transitional	pyrite	euhedral	15.388	498718	9.5036	275.607	8.51514	1.061	0.0479396	0.513741	314.983	12.3167	0.0246798	0.122197	0.0116892	0.094423	1.12288	0.2188	0.0343737	0.0121848	22.8356	0.0637276	0.0344824	0.539365	0.00279071	0.0301718	0.000533589	0.0491724	0.00259689	0.00108076	0.00670563	1.29601	0.00128213	0.118153	0.00259689			0.289051	9.97945	0.0403265	0.189491	0.183668	1.061	0.0479396	0.513741	0.234442
LM-JB-03-06	Fakos	epithermal	transitional	pyrite	euhedral	26.637	472107	462.077	61.3362	8.80932	1.39264	0.24097	1.43216	559.85	76.8218	0.0842038	0.0898936	0.0179838	0.128344	0.625622	12.1794	0.0946745	0.0290419	109.514	7.71979	7.53351	0.701478	0.0704911	0.825358	0.000265188	0.0057127	0.000182229	0.000768884	0.0167067	0.166253	6.28508e-05	0.00135394	0.000182229			0.28153	9.76034	0.0285163	0.232787	0.284349	1.39264	0.0492158	0.295464	0.174872
LM-JB-03-07	Fakos	epithermal	transitional	pyrite	euhedral	15.3315	498013	654.787	47.3501	22.6317	0.995471	0.0561187	0.688213	305.621	62.7842	0.0435965	0.124923	0.0163974	0.145325	0.184315	17.1425	0.0263107	0.0182648	6.38439	0.357169	13.8286	9.83402	0.0559441	2.14248	0.00286086	0.0288695	6.65811e-05	0.0068286	0.000545473	0.0958849	2.78943e-05	0.000281488	6.65811e-05			0.2688	6.8751	0.028291	0.294074	0.212055	0.995471	0.0561187	0.401499	0.189608
LM-JB-03-08	Fakos	epithermal	transitional	pyrite	euhedral	16.1317	488997	1960.61	64.175	38.8329	1.05344	0.0361009	0.543859	390.061	47.0115	0.197223	0.209406	0.0107557	0.139823	0.163704	11.6325	0.0452256	0.0159274	52.8619	9.96168	30.551	0.889326	0.188447	5.02642	0.000301302	0.00309682	0.000100593	0.00373091	0.0050809	0.023978	8.1237e-06	8.34964e-05	0.000100593			0.224328	7.84088	0.0497975	0.279885	0.224821	1.05344	0.0361009	0.396216	0.19966
LM-JB-03-09	Fakos	epithermal	transitional	pyrite	euhedral	14.996	479119	1226.04	16.3416	0.861285	0.800658	0.0367239	0.567204	488.033	238.311	0.037233	0.0904761	0.0124566	0.0733319	0.0601253	53.4886	0.1029	0.0124291	2.71996	0.330067	75.0253	87.6158	0.12135	2.5122	0.00456961	0.0221052	3.03686e-05	0.0136888	0.000269215	0.194375	1.01377e-05	4.90403e-05	3.03686e-05			0.282767	15.1656	0.0328794	0.378184	0.22091	0.800658	0.0367239	0.567204	0.295365
LM-JB-03-10	Fakos	epithermal	transitional	pyrite	euhedral	62.6771	455376	771.159	331.864	40.6988	4.92359	0.145021	0.57788	2043.92	107.22	0.379489	0.193797	0.00866604	0.154318	0.881466	33.6877	0.353305	0.0221966	135.501	39.8829	2.32372	0.791281	0.294336	0.377295	0.000163811	0.00650522	0.000492102	0.00280063	0.0517181	0.139037	2.87835e-05	0.00114304	0.000492102			0.275491	9.86585	0.0303623	0.294611	0.171689	1.12766	0.0406459	0.57788	0.224592
LM-JB-03-11	Fakos	epithermal	transitional	pyrite	euhedral	15.3347	474468	310.444	386.033	0.22508	0.933152	0.0669077	0.581661	809.757	75.0503	0.0345789	0.223703	0.0134936	0.0851366	0.0344649	1.44088	0.0243359	0.0157409	0.322683	0.0656246	0.804192	232.582	0.203371	0.383379	0.0487814	0.106807	0.000111385	0.10716	0.000211389	0.241751	5.07046e-05	0.000111018	0.000111385			0.230636	13.9924	0.0635007	0.295779	0.22508	0.933152	0.0669077	0.389944	0.264881
LM-JB-03-12	Fakos	epithermal	transitional	pyrite	euhedral	15.069	491274	115.77	3594.58	1.56073	1.54055	0.063382	0.730079	3505.43	190.081	0.07187	0.260597	0.0149388	0.0809514	0.0978055	0.889212	0.0634999	0.0142853	6.43304	1.13677	0.0322067	29.5477	0.176709	0.0330258	0.00222062	0.0152036	0.000620802	0.011172	0.00981928	1.64189	0.000123394	0.000844829	0.000620802			0.278235	4.06849	0.0412577	0.324268	0.26671	1.54055	0.063382	0.456011	0.224518
LM-JB-03-13	Fakos	epithermal	transitional	pyrite	subhedral	14.7908	492395	312.337	110.235	0.303412	0.937585	0.0264662	0.755348	391.158	146.151	0.0373143	0.163344	0.00970484	0.120947	0.0437241	43.0377	0.0333553	0.0158768	0.269681	0.0347418	2.83337	541.94	0.128825	0.798494	0.0588724	0.162133	0.000119468	0.138364	0.000111232	0.467927	5.08322e-05	0.00013999	0.000119468			0.229482	8.69765	0.0401464	0.380431	0.303412	0.937585	0.0264662	0.337173	0.272611
LM-JB-03-14	Fakos	epithermal	transitional	pyrite	subhedral	15.7266	472709	1080.23	38.4462	3.33173	1.27006	0.0269489	0.837424	978.958	129.434	0.0667729	0.089625	0.00499516	0.104439	0.248213	101.342	0.542146	0.0244945	27.5533	4.53058	28.0973	4.69758	0.16443	1.10345	0.000888984	0.00900845	6.18134e-05	0.00242341	0.00419408	0.11982	2.26752e-05	0.000229777	6.18134e-05			0.316267	6.41606	0.0285593	0.270707	0.2061	1.27006	0.0269489	0.366169	0.239847
LM-JB-03-15	Fakos	epithermal	transitional	pyrite	subhedral	16.5804	511816	34.4514	58.5752	2.91936	1.02171	0.0365618	0.678329	807.363	243.901	0.0626288	0.102421	0.0066722	0.124281	0.0483132	3.24855	0.0227506	0.0157265	21.1999	4.61688	0.588158	11.5048	0.217778	0.0426716	0.000741822	0.00227894	0.00181789	0.0029542	0.134011	7.07957	0.000456484	0.00140236	0.00181789			0.266616	11.0859	0.0420902	0.560518	0.136114	0.542776	0.0365618	0.316648	0.28563
LM-JB-03-16	Fakos	epithermal	transitional	pyrite	subhedral	16.0681	498922	443.742	58.1175	0.445224	1.2645	0.0846073	0.56572	762.834	123.647	0.0300676	0.22153	0.0122169	0.120293	0.0494525	28.8944	0.0847369	0.0128254	7.14998	1.37053	7.63525	17.2934	0.191682	0.581702	0.00179377	0.00691645	6.77592e-05	0.00420527	0.00308857	0.278647	2.89029e-05	0.000111444	6.77592e-05			0.297059	9.07564	0.0462528	0.379946	0.1979	1.2645	0.0846073	0.56572	0.232996
LM-JB-03-17	Fakos	epithermal	transitional	pyrite	subhedral	15.5844	517290	430.582	43.369	1.23255	0.696212	0.0510426	0.609553	844.785	144.618	0.0137035	0.0038473	0.00662761	0.106436	0.0482508	61.3496	0.296722	0.016827	11.734	3.15284	9.92835	12.3247	0.268693	0.509695	0.00143404	0.00411206	3.18255e-05	0.00116785	0.00732227	0.335865	3.90796e-05	0.000112059	3.18255e-05			0.348596	8.12702	0.0220633	0.250315	0.193299	0.696212	0.0510426	0.609553	0.282143
LM-JB-03-18	Fakos	epithermal	transitional	pyrite	subhedral	15.4596	473000	647.063	172.606	1.43835	1.45568	0.0454401	0.581405	500.196	165.042	0.0379686	0.200598	0.0114448	0.0795548	0.0610759	63.9393	0.181805	0.0210424	9.47785	1.77452	3.7488	17.4135	0.187228	1.29362	0.00222017	0.00644407	5.86785e-05	0.00400604	0.00274243	0.255063	3.25199e-05	9.43894e-05	5.86785e-05			0.242866	9.21594	0.0565628	0.236887	0.226785	1.08847	0.0454401	0.363153	0.328182
LM-JB-14-01	Fakos	epithermal	transitional	pyrite	anhedral, inclusions	15.363	486648	464.771	225.042	0.20656	1.14624	0.178532	1.13971	486.068	102.448	0.0226014	0.161239	0.00508955	0.150371	0.0509532	1.5186	0.111276	0.0181503	1.25611	2.42339	2.06526	81.5595	1.92928	0.956186	0.0144496	0.0405642	4.86291e-05	0.0179931	0.00521416	0.220427	3.90521e-05	0.000109631	4.86291e-05			0.307321	6.97457	0.0265675	0.178268	0.20656	1.14624	0.0545609	0.398031	0.181122
LM-JB-14-02	Fakos	epithermal	transitional	pyrite	anhedral, inclusions	17.2662	488510	166.98	189.104	0.26693	0.822528	0.0293731	0.667588	393.597	115.454	0.0228226	0.244708	0.0120482	0.125934	0.0652682	0.717009	0.0356735	0.0196875	0.560873	0.894685	0.883006	205.847	1.59516	0.424241	0.0351015	0.116369	0.000136679	0.0406913	0.00535804	0.691424	0.000117903	0.000390875	0.000136679			0.287791	11.2635	0.0274868	0.318307	0.236188	0.822528	0.0293731	0.328379	0.168173
LM-JB-14-03	Fakos	epithermal	transitional	pyrite	anhedral, inclusions	15.6717	473360	191.45	986.566	0.444257	1.18497	0.0447428	1.09426	264.328	83.1332	0.02748	0.196325	0.0043681	0.144859	0.0476949	0.273341	0.0130721	0.0110813	0.0363428	0.0167941	0.194057	2287.47	0.462103	0.724287	0.304911	1.31236	0.000143536	0.756134	8.77207e-05	0.43423	5.7881e-05	0.000249125	0.000143536			0.274188	9.27544	0.0381965	0.17748	0.169988	1.18497	0.0447428	0.301976	0.233439
LM-JB-14-04	Fakos	epithermal	transitional	pyrite	anhedral, inclusions	16.344	498146	78.7872	359.505	0.229095	1.05829	0.0306737	0.616792	124.72	197.346	0.0256643	0.218194	0.0100136	0.0936753	0.034348	0.388632	0.0219978	0.0127631	0.0904747	0.299407	0.219155	2181.23	3.30929	0.631712	0.141068	0.379642	0.000325742	0.283663	0.0038002	2.5048	0.000161994	0.000435959	0.000325742			0.170741	7.43384	0.0378123	0.212234	0.229095	1.05829	0.0306737	0.317245	0.151798
LM-JB-14-05	Fakos	epithermal	transitional	pyrite	anhedral, inclusions	16.4772	473278	243.903	644.729	0.161396	0.858597	0.0490142	0.663774	69.753	68.7859	0.0193333	0.18068	0.00947876	0.099277	0.0594717	0.525495	0.0181589	0.00936516	0.0314373	0.19737	0.378304	2188.03	6.2782	3.49668	0.297899	1.89175	7.92664e-05	0.61498	0.000809214	0.282021	3.8397e-05	0.000243833	7.92664e-05			0.219823	8.52566	0.0254347	0.258086	0.161396	0.858597	0.0490142	0.337842	0.130573
LM-JB-14-06	Fakos	epithermal	transitional	pyrite	anhedral, inclusions	15.1027	470046	160.464	529.872	0.189663	0.923966	0.0481507	0.78623	531.878	124.68	0.0333104	0.174393	0.00988402	0.105427	0.0675098	1.98532	0.4559	0.0217316	0.271507	0.0846712	0.302835	459.216	0.311857	0.301693	0.0800407	0.248649	0.000207589	0.122687	0.000527666	0.776999	0.00013543	0.000420717	0.000207589			0.262516	5.69035	0.038365	0.285207	0.189663	0.923966	0.0481507	0.295606	0.160831
LM-JB-14-07	Fakos	epithermal	transitional	pyrite	anhedral, inclusions	15.6028	471273	268.118	371.413	0.160274	1.32619	0.0316853	1.05296	124.854	77.5292	0.0335333	0.131724	0.00856798	0.11982	0.0722202	0.162284	0.0490028	0.0163678	0.020153	0.0280745	0.721887	3847.03	1.39307	2.14745	0.812174	3.58359	0.000125069	1.66394	0.000104709	0.28916	6.10468e-05	0.000269359	0.000125069			0.41713	6.5981	0.0299415	0.255951	0.160274	1.32619	0.0316853	0.293921	0.22161
LM-JB-14-08	Fakos	epithermal	transitional	pyrite	anhedral, inclusions	16.5756	494675	106.169	495.43	0.204949	1.21385	0.0265183	0.882269	761.448	153.577	0.0297225	0.190555	0.0074694	0.100978	0.068035	0.404877	0.080024	0.0110586	0.389474	0.109913	0.214298	394.32	0.282209	0.139431	0.0283937	0.174685	0.000279954	0.0763146	0.00103526	1.44653	0.00010416	0.000640816	0.000279954			0.380455	10.6302	0.0245588	0.392461	0.175796	1.21385	0.0265183	0.367977	0.253841
LM-JB-14-09	Fakos	epithermal	transitional	pyrite	subhedral	18.827	475663	481.22	1123.83	2.95868	1.21289	0.0831583	1.03103	252.578	109.676	1.59929	0.180433	0.00969102	0.129953	15.1849	6.16097	0.0334134	0.757868	30.389	3.48415	0.428197	3.60906	0.114652	1.90523	0.0249389	0.499683	0.00332341	0.0526273	0.00724025	0.227912	0.00157489	0.031555	0.00332341			0.217395	8.81037	0.0472569	0.236245	0.117285	1.21289	0.0710977	0.23206	0.244351
LM-JB-14-10	Fakos	epithermal	transitional	pyrite	subhedral	16.2109	489418	841.037	765.882	0.359749	0.846139	0.0385843	0.494654	258.85	102.922	0.033437	0.119729	0.0126808	0.087478	0.0575609	3.8259	0.0380983	0.0183833	85.3586	1.86795	1.09813	1.20576	0.0218835	3.24912	0.000215366	0.000674342	3.97569e-05	0.000391724	0.002221	0.122375	2.18579e-05	6.84404e-05	3.97569e-05			0.280999	7.09524	0.0612619	0.375076	0.219918	0.846139	0.0385843	0.397594	0.189658
LM-JB-14-11	Fakos	epithermal	transitional	pyrite	anhedral, inclusions	20.0687	470879	57.1731	1432.01	24.455	2.30173	0.498395	0.615202	1829.02	1.50585	4.55185	0.202435	0.00644813	1.44194	197.82	3.28888	0.370645	5.09172	536.883	25.4989	0.0399251	0.00280481	0.0474944	0.0312588	0.00948384	0.368459	0.0796153	0.00847828	0.445996	0.0263385	0.089058	3.46002	0.0796153			0.264194	9.77912	0.0345373	0.224167	0.234834	1.3177	0.0540313	0.479731	0.150339
LM-JB-14-12	Fakos	epithermal	transitional	pyrite	anhedral, inclusions	29.185	466187	106.201	273.548	0.271495	1.2884	0.61116	0.513764	370.286	97.4951	0.0306577	0.0699619	0.0138076	0.234771	0.0664712	1.05435	0.0260697	0.0822128	11.3174	3.18457	0.388233	8.61465	0.281388	0.286807	0.00726432	0.00587339	0.000288678	0.00270891	0.0299864	0.918027	0.000774128	0.000625902	0.000288678			0.269735	7.28322	0.0466515	0.235505	0.224614	0.812671	0.041897	0.392342	0.188881
LM-JB-14-13	Fakos	epithermal	transitional	pyrite	anhedral, inclusions	15.212	462792	60.1126	426.359	14.1226	1.00605	0.0393956	0.83199	3291.2	34.7513	1.79174	0.112864	0.00635465	0.0672402	15.7775	3.38338	0.39483	0.23298	192.965	43.4602	0.140991	0.180091	0.225223	0.0182646	0.00120737	0.0817633	0.0298064	0.00928532	0.722979	0.578104	0.00387573	0.262465	0.0298064			0.154904	9.80397	0.0244646	0.218912	0.190854	1.00605	0.0393956	0.468408	0.224913
LM-JB-14-14	Fakos	epithermal	transitional	pyrite	anhedral, inclusions	15.8027	449750	55.1189	125.658	0.211276	1.4116	0.0349999	1.17325	326.854	130.507	0.0172815	0.13708	0.0066832	0.0525805	0.0577722	0.218635	0.0456182	0.0120728	0.030163	0.0159195	0.438642	4326.73	0.527784	0.168635	0.400253	1.91533	0.000313532	0.572939	0.000288822	2.36774	0.000219033	0.00104814	0.000313532			0.228525	7.98297	0.0267876	0.373606	0.211276	1.4116	0.0349999	0.483258	0.222805
LM29_I_py_1.1	Fakos	epithermal	epithermal HS	pyrite		n.a.	461315	12.5003	126.578	166.466	71.5351	n.a.	n.a.	2.94925	64.6585	8.93745	0.303009	n.a.	n.a.	1.2225	33.9846	2.57787	0.0588674	1820.96	7.99979	0.0987558	0.0355078	0.00439316	4.23846	3.23276e-05	0.000671347	0.71498	0.00490809	0.639968	5.17256	0.00470928	0.0977977	0.71498			n.a.	14.0054	0.0332581	0.373262	0.453385	3.41247	n.a.	n.a.	0.2465
LM29_I_py_1.2	Fakos	epithermal	epithermal HS	pyrite		n.a.	504089	7.98322	184.431	75.1961	36.9151	n.a.	n.a.	31.4341	104.723	10.7201	0.46208	n.a.	n.a.	148.409	3.19359	0.389341	0.807356	3686.76	7.63518	0.0432857	0.0284053	0.00207097	0.253967	0.000218988	0.0402547	1.34283	0.00290773	0.956403	13.1179	0.101132	18.5902	1.34283			n.a.	41.2524	0.135691	0.803809	1.14921	14.3893	n.a.	n.a.	0.927719
LM29_I_py_1.3	Fakos	epithermal	epithermal HS	pyrite		n.a.	526525	213.791	1796.72	1189.87	2.19045	n.a.	n.a.	30.6634	11.9654	13.6219	0.124575	n.a.	n.a.	1.16849	14.9554	0.564912	0.202852	33.8165	57.9038	0.118989	0.353834	1.7123	6.97218	0.00599861	0.0345539	0.0637161	0.402818	0.270843	0.0559679	0.000948834	0.00546559	0.0637161			n.a.	13.7223	0.036138	0.270166	0.659413	2.19045	n.a.	n.a.	0.205525
LM29_I_py_1.6	Fakos	epithermal	epithermal HS	pyrite		n.a.	447951	65.7652	563.114	63.1298	3.38182	n.a.	n.a.	212.895	6.21274	3.55125	0.161408	n.a.	n.a.	9.66373	13.3275	0.260536	0.029567	13.9998	0.846125	0.116788	0.443773	0.0604384	0.30891	0.00211195	0.690276	0.053999	0.253664	0.0128659	0.0944685	0.000449584	0.146943	0.053999			n.a.	14.3631	0.0397278	0.338472	0.569697	3.38182	n.a.	n.a.	0.269305
LM29_I_py_3	Fakos	epithermal	epithermal HS	pyrite		n.a.	448107	0.0956869	56.4668	2.46589	3.20335	n.a.	n.a.	0.320004	38.5335	0.0245091	0.269203	n.a.	n.a.	0.172226	0.251032	0.0196546	0.0105054	0.127101	0.0540641	0.00169457	303.172	0.425363	0.299018	0.0826537	1.35503	0.256138	0.192831	0.565011	402.704	0.109789	1.79989	0.256138			n.a.	17.6686	0.0453679	0.322825	0.475495	3.20335	n.a.	n.a.	0.320004
LM29_I_py_5	Fakos	epithermal	epithermal HS	pyrite		n.a.	471460	0.0366508	2.75697	1019.03	3.36799	n.a.	n.a.	0.210904	48.3467	0.423363	0.198505	n.a.	n.a.	0.158597	2.43723	0.0522743	0.00665406	0.581837	3.03678	0.0132939	83.0932	5.2193	0.17378	0.0114363	0.27258	11.5513	0.727631	82.8572	1319.12	0.181553	4.32725	11.5513			n.a.	19.3235	0.0366508	0.243241	0.527846	3.36799	n.a.	n.a.	0.210904
LM29_I_py_2	Fakos	epithermal	epithermal HS	pyrite		n.a.	453406	0.0410502	10.741	534.093	4.56609	n.a.	n.a.	0.251869	2.90687	2.38826	0.087807	n.a.	n.a.	0.287062	2.23947	0.128548	0.0111797	1.65954	8.66374	0.00382182	1.75162	5.22058	0.162983	0.00673664	0.172977	58.1789	1.43911	211.052	70.8125	0.272342	6.99293	58.1789			n.a.	11.4049	0.0285563	0.279787	0.483556	4.56609	n.a.	n.a.	0.176401
LM29_III_py_1	Fakos	epithermal	epithermal HS	pyrite		n.a.	459134	1810.57	5996.31	662.104	13.9102	n.a.	n.a.	52.0134	44.6732	36.9058	0.100222	n.a.	n.a.	0.96785	38.3289	0.391053	0.0942204	98.0318	146.632	0.301947	0.455701	1.49576	34.8097	0.00096112	0.00987281	0.0203836	0.376468	0.0809868	0.0246735	5.20391e-05	0.000534555	0.0203836			n.a.	23.1474	0.0416695	0.49189	0.782229	3.47942	n.a.	n.a.	0.277477
LM29_III_py_2	Fakos	epithermal	epithermal HS	pyrite		n.a.	447497	0.156828	0.755956	630.187	3.41661	n.a.	n.a.	0.231621	27.2086	0.044345	0.137725	n.a.	n.a.	0.078179	2.0791	0.0578562	0.0104775	0.0931002	9.638	0.207457	292.251	103.523	0.67709	0.11254	0.839729	0.282762	0.476314	61.4559	173.493	0.0668091	0.498502	0.282762			n.a.	14.7267	0.0409448	0.188218	0.519343	3.41661	n.a.	n.a.	0.231621
LM29_III_py_4	Fakos	epithermal	epithermal HS	pyrite		n.a.	428116	1.4497	6.44191	485.726	4.2671	n.a.	n.a.	0.375403	5.29023	1.34184	0.118331	n.a.	n.a.	0.169153	3.27568	0.114388	0.0105496	3.26384	8.08375	0.225042	1.62086	2.47676	3.86172	0.00323226	0.0518266	0.925599	0.411125	5.57614	3.64918	0.00727706	0.116681	0.925599			n.a.	14.8258	0.0526024	0.349684	0.569238	4.2671	n.a.	n.a.	0.192634
LM29_III_py_5	Fakos	epithermal	epithermal HS	pyrite		n.a.	451763	0.0480007	1.1914	1259.71	2.64921	n.a.	n.a.	0.293174	265.772	0.0270243	0.187995	n.a.	n.a.	0.0761265	0.349245	0.0343937	0.00657842	0.144321	0.673222	0.0402894	1841.53	4.66476	0.163728	0.0455819	0.527481	0.562997	0.187251	14.0253	5536.83	0.137048	1.58595	0.562997			n.a.	11.677	0.0480007	0.295667	0.477878	2.64921	n.a.	n.a.	0.293174
LM29_V_py_1.1	Fakos	epithermal	epithermal HS	pyrite		n.a.	439050	9.75783	62.7045	1105.6	3.68517	n.a.	n.a.	0.544063	66.1025	1.22327	0.261382	n.a.	n.a.	0.363386	0.854145	0.0478813	0.0114765	1.01652	19.361	0.155616	65.0283	19.0464	17.9351	0.01129	0.357481	0.125363	1.20339	1.98416	6.77431	0.00117613	0.0372405	0.125363			n.a.	19.7785	0.0388708	0.272507	0.541063	3.68517	n.a.	n.a.	0.476369
LM29_V_py_1.2	Fakos	epithermal	epithermal HS	pyrite		n.a.	427826	2.16113	3.34678	360.019	3.81323	n.a.	n.a.	0.33085	13.631	0.041032	0.203059	n.a.	n.a.	0.0682594	0.354809	0.0243866	0.0161459	0.207637	1.75828	0.645734	65.6482	8.46806	6.53206	0.0777605	0.328744	0.0189863	0.197614	0.813593	6.30734	0.00747106	0.031585	0.0189863			n.a.	18.548	0.0427707	0.204957	0.564511	3.81323	n.a.	n.a.	0.33085
LM29_V_py_1.3	Fakos	epithermal	epithermal HS	pyrite		n.a.	446561	0.0753178	20.686	1368.91	2.70659	n.a.	n.a.	1.08275	15.3788	14.6518	0.182025	n.a.	n.a.	1.01733	10.0671	0.52135	0.00733499	5.51889	50.8856	0.003641	2.78657	9.22025	0.0695615	0.00132907	0.184337	194.533	2.65484	675.612	204.185	0.0973873	13.5072	194.533			n.a.	15.8775	0.0322717	0.297297	0.558151	2.70659	n.a.	n.a.	0.325306
LM29_VII_py_1	Fakos	epithermal	epithermal HS	pyrite		n.a.	434357	0.40564	26.9351	1632.08	2.53976	n.a.	n.a.	0.630644	81.9611	2.33769	0.102297	n.a.	n.a.	0.660445	10.027	0.335272	0.00763326	3.30252	23.4172	0.0150599	24.8178	7.0907	0.643216	0.00231134	0.199982	5.76296	0.707851	57.7289	202.054	0.0188178	1.62815	5.76296			n.a.	13.7022	0.0351005	0.178903	0.347994	2.23242	n.a.	n.a.	0.278086
LM29_VII_py_3	Fakos	epithermal	epithermal HS	pyrite		n.a.	461855	52.6443	329.646	5890.66	4.68937	n.a.	n.a.	18.1802	160.253	16.9692	0.0950162	n.a.	n.a.	27.1224	17.2069	0.47972	0.0817624	145.986	54.8175	0.159699	1.09772	0.375498	2.89568	0.000560069	0.185788	0.322336	0.116238	1.04128	3.04407	0.00155311	0.515202	0.322336			n.a.	15.5411	0.0271932	0.217877	0.425322	3.13845	n.a.	n.a.	0.206252
LM29_IX_py_1.1	Fakos	epithermal	epithermal HS	pyrite		n.a.	444279	0.0496106	0.27145	123.258	2.3296	n.a.	n.a.	0.222411	2.32393	0.02502	0.158458	n.a.	n.a.	0.0367309	0.410347	0.0168718	0.0111623	0.137492	0.789488	0.182761	16.9023	5.74205	0.223059	0.0811847	0.267148	0.504328	0.181974	15.9137	46.8434	0.224998	0.740383	0.504328			n.a.	16.1613	0.0496106	0.27145	0.595839	2.3296	n.a.	n.a.	0.222411
LM29_IX_py_1.2	Fakos	epithermal	epithermal HS	pyrite		n.a.	472948	1.74709	9.73049	521.26	3.58167	n.a.	n.a.	0.307973	90.0213	0.0351734	0.165296	n.a.	n.a.	0.047831	0.13528	0.0262999	0.014743	0.140116	0.0944859	0.179547	642.476	0.674339	5.67285	0.10522	0.341367	0.0201326	0.25103	0.054082	51.5266	0.00843862	0.0273776	0.0201326			n.a.	34.7449	0.0443378	0.402404	0.589829	3.58167	n.a.	n.a.	0.307973
LM29_IX_py_1.3	Fakos	epithermal	epithermal HS	pyrite		n.a.	422973	30.0258	71.9007	603.452	2.38203	n.a.	n.a.	47.1684	59.8794	0.090913	0.0953318	n.a.	n.a.	5.74835	0.286632	0.115652	0.00820931	1.84954	26.9025	0.417601	32.3752	14.5455	0.636566	0.00443855	3.10798	0.00302783	0.0491542	0.895978	1.99426	0.000273408	0.191447	0.00302783			n.a.	17.4311	0.0319315	0.173377	0.401219	2.38203	n.a.	n.a.	0.199932
LM29_X_py_1	Fakos	epithermal	epithermal HS	pyrite		n.a.	423216	0.0488194	1.24677	562.995	2.17229	n.a.	n.a.	0.174603	3.9776	0.067707	0.16325	n.a.	n.a.	0.0691708	2.19585	0.0325539	0.0106414	0.0587106	5.6615	0.0391568	67.7492	96.4306	0.279603	0.181251	1.17816	1.38689	1.15323	115.968	81.4757	0.217974	1.41687	1.38689			n.a.	22.6312	0.0473765	0.196811	0.550294	2.17229	n.a.	n.a.	0.174603
LM29_X_py_2	Fakos	epithermal	epithermal HS	pyrite		n.a.	385683	0.0309652	7.35443	584.144	3.00584	n.a.	n.a.	0.490365	4.21975	0.898126	0.108445	n.a.	n.a.	0.829941	4.57438	0.108605	0.00853135	0.412797	20.4145	0.00421042	10.2223	49.454	0.0631474	0.0206672	2.01053	29.0043	2.17571	659.271	136.274	0.275514	26.8023	29.0043			n.a.	15.5517	0.0309652	0.224407	0.505574	3.00584	n.a.	n.a.	0.259081
LM29_XI_py_6	Fakos	epithermal	epithermal HS	pyrite		n.a.	350756	0.0573237	3.77514	881.812	3.447	n.a.	n.a.	0.207927	163.733	0.411431	0.182593	n.a.	n.a.	0.0787694	2.24044	0.0167611	0.00770044	0.70288	5.28304	0.0151845	232.946	7.51627	0.275692	0.0109555	0.112067	7.17732	0.58535	92.1615	2856.29	0.134333	1.37411	7.17732			n.a.	14.4483	0.0265451	0.195457	0.518369	3.447	n.a.	n.a.	0.207927
LM29_XI_py_8	Fakos	epithermal	epithermal HS	pyrite		n.a.	362964	85.9647	200.371	599.414	3.61377	n.a.	n.a.	3.3519	38.9861	1.47829	0.110061	n.a.	n.a.	8.69079	2.16113	0.137371	0.0190161	452.462	15.3544	0.429028	0.0861642	0.0339352	25.6466	4.2028e-05	0.0192078	0.0171964	0.00326721	0.178613	0.453513	0.000221208	0.101097	0.0171964			n.a.	14.6882	0.0213262	0.246191	0.33672	3.61377	n.a.	n.a.	0.228434
LM-JB-6a-01	Fakos	epithermal	epithermal IS	pyrite	euhedral	23.4568	543004	4.03531	269.775	167.734	1.97522	0.0507804	0.896111	17598.3	5.48364	9.84708	0.216102	0.020496	0.153709	286.163	6.89568	13.0443	0.726975	931.788	0.30944	0.0149581	0.00588508	0.000332092	0.000229301	0.000780194	0.307112	2.44023	0.0105679	0.076683	1.35892	0.180154	70.9147	2.44023			0.516951	12.8465	0.052073	0.628236	0.324543	1.97522	0.0507804	0.717021	0.453755
LM-JB-6A-02	Fakos	epithermal	epithermal IS	pyrite	euhedral	21.6916	543829	18.5059	1482.43	167.845	1.23862	0.0477013	0.606441	14254.8	4.65439	8.84828	0.296109	0.0149709	0.138811	226.599	10.2726	8.19395	0.331088	769.625	0.318419	0.0124835	0.00604761	0.000413732	0.00129822	0.000430193	0.294428	0.478133	0.0114969	0.0172063	0.251509	0.0178909	12.2447	0.478133			0.368208	10.5164	0.0386488	0.443952	0.405929	1.23862	0.0477013	0.606441	0.352984
LM-JB-6A-03	Fakos	epithermal	epithermal IS	pyrite	euhedral	45.6612	552486	4.69481	504.594	164.692	1.63542	0.0650203	1.42095	27952.5	3.92012	2.64768	0.274988	0.0100494	0.156922	62.6847	3.30542	9.10496	0.233022	378.465	0.0879477	0.00930414	0.0103579	0.00023238	0.000167957	0.000615702	0.165629	0.563959	0.00699585	0.018733	0.834989	0.0496339	13.3519	0.563959			0.468027	8.34495	0.0718314	0.369954	0.347109	1.63542	0.0650203	0.634816	0.253713
LM-JB-6A-04	Fakos	epithermal	epithermal IS	pyrite	subhedral	22.3517	525431	122.019	683.733	1.8665	1.42593	0.0673284	1.19667	948.332	41.4231	0.0421799	0.152585	0.0109616	0.141415	0.958703	6.22039	0.363123	0.0297929	9.63189	1.22995	0.178459	4.30062	0.127695	0.128667	0.00309315	0.0995343	0.000345684	0.00437919	0.01008	0.339482	0.000244167	0.00785703	0.000345684			0.524307	11.3408	0.0513104	0.511272	0.28444	1.42593	0.0673284	1.19667	0.436895
LM-JB-6A-05	Fakos	epithermal	epithermal IS	pyrite	subhedral	28.7631	478526	91.348	536.628	30.7153	10.2626	0.556364	0.558773	7839.08	19.1686	0.337243	0.151909	0.00775497	0.183745	35.6577	3.18026	0.194111	0.0503109	328.077	25.6184	0.170226	0.0584271	0.0780865	0.0116529	0.000153351	0.108687	0.00369185	0.00102794	0.280448	0.209842	0.000550761	0.39035	0.00369185			0.330519	7.26857	0.0720823	0.357503	0.274319	1.45835	0.0334385	0.32695	0.388585
LM-JB-6A-06	Fakos	epithermal	epithermal IS	pyrite	euhedral, dissolution	18.6309	472834	29.2701	79.7154	54.8463	1.16638	0.0580168	0.540928	13083.4	17.5978	0.395791	0.100676	0.00520336	0.103654	74.4112	4.50654	1.6224	0.0143108	712.647	71.3034	0.367182	0.0246936	0.100054	0.00223719	2.00811e-05	0.104415	0.013522	0.000555382	2.43605	0.601222	0.00048892	2.54223	0.013522			0.306453	8.15009	0.0423069	0.449816	0.282036	1.16638	0.0580168	0.540928	0.444441
LM-JB-6A-07	Fakos	epithermal	epithermal IS	pyrite	subhedral	20.4585	530227	0.0842752	3.97043	10.3977	2.32988	0.0527005	0.869609	0.464819	2.46861	0.0663334	0.283544	0.0104332	0.142512	0.0618493	0.00243903	0.0284108	0.0121568	1.79568	0.0251601	0.0212257	1.37475	0.0140114	0.181307	0.00677003	0.0344434	0.787105	0.0369406	0.298546	29.2922	0.144251	0.733896	0.787105			0.303912	8.52944	0.0842752	0.247617	0.268429	2.32988	0.0527005	0.869609	0.464819
LM-JB-6A-08	Fakos	epithermal	epithermal IS	pyrite	subhedral	20.255	542170	0.0459432	5.84141	17.2178	1.77402	0.0610279	0.412478	0.410482	2.62886	0.0453196	0.120992	0.0156148	0.10871	0.0950707	0.181651	0.0260051	0.0269122	0.455714	0.0173907	0.00786509	5.76868	0.0381615	0.111925	0.0590552	0.208619	0.986425	0.0994474	0.378526	57.2199	0.585772	2.06931	0.986425			0.293879	9.25284	0.0459432	0.320401	0.347905	1.77402	0.0610279	0.412478	0.410482
LM-JB-6A-09	Fakos	epithermal	epithermal IS	pyrite	subhedral	21.8327	539905	0.0499147	0.704976	6.29098	2.11962	0.0734674	1.13335	0.725606	2.57563	0.153212	0.299383	0.0115763	0.13512	0.0871594	0.750821	0.000623701	0.027516	1.77043	0.028392	0.0708034	1.45481	0.0160368	0.0687904	0.015542	0.0492308	3.06949	0.0865399	0.56881	51.6006	0.551261	1.74617	3.06949			0.402409	9.13068	0.0499147	0.704976	0.297379	2.11962	0.0734674	0.692422	0.725606
LM-JB-6A-12	Fakos	epithermal	epithermal IS	pyrite	subhedral	67.0304	488150	14.517	54.7696	15.4269	5.14547	0.487224	0.574426	27.1709	26.5489	0.683794	0.0931174	0.0102922	0.105464	0.392291	8.15265	0.060788	0.0271953	20.8957	3.9853	0.265055	1.27055	0.190724	0.534284	0.00130148	0.0187738	0.047103	0.0327242	0.274527	1.82882	0.00187334	0.0270229	0.047103			0.353589	10.0028	0.0511664	0.434712	0.332559	1.68643	0.115378	0.574426	0.437606
LM-JB-6A-13	Fakos	epithermal	epithermal IS	pyrite	subhedral	38.257	465754	69.6854	494.714	9.58577	71.4517	0.119669	0.607741	89.4461	6.02433	0.41091	0.307491	0.00771543	0.064061	1.68601	2.39278	0.226258	0.0363742	136.979	1.68293	0.14086	0.0439798	0.012286	0.779077	0.000265545	0.0123085	0.00589664	0.00299979	0.0241504	0.0864503	0.000521977	0.0241946	0.00589664			0.469747	6.87612	0.0405619	0.344006	0.187083	1.22399	0.0394572	0.329482	0.321448
LM-JB-6A-14	Fakos	epithermal	epithermal IS	pyrite	anhedral	48.6585	455972	345.718	830.375	5.92838	3.68312	0.620045	0.547721	990.867	51.8065	0.336124	0.352249	0.0130399	0.329797	5.5694	5.94508	0.119209	0.255116	53.0182	9.5259	0.41634	0.977145	0.179672	0.348904	0.00481186	0.105047	0.000972249	0.00633978	0.027554	0.149852	0.000737931	0.0161097	0.000972249			0.224986	8.61428	0.0249671	0.293149	0.322421	1.59379	0.0841861	0.547721	0.464232
LM-JB-6A-15	Fakos	epithermal	epithermal IS	pyrite	subhedral	38.8753	502154	288.129	972.715	1.67323	4.35084	0.0908903	0.808927	137.405	44.9226	0.225461	0.269056	0.00946758	0.183862	0.180288	1.6532	0.0298103	0.0281495	2.57979	4.40696	0.296211	17.4133	1.70826	2.09693	0.0109115	0.0698849	0.0007825	0.0873951	0.0152951	0.155911	9.76974e-05	0.000625721	0.0007825			0.325752	14.0952	0.0603385	0.308907	0.251399	1.38018	0.0908903	0.808927	0.380111
LM-JB-6A-16	Fakos	epithermal	epithermal IS	pyrite	subhedral	64.1256	509907	50.7119	930.321	29.2573	89.9518	0.194236	0.628438	453.193	41.8671	5.6313	0.221106	0.0263377	0.268194	2.0188	7.93316	0.527482	0.136707	242.098	1.44067	0.0545101	0.172935	0.00595077	0.111899	0.000564674	0.00833875	0.111045	0.0232604	0.0284089	0.825587	0.00269575	0.0398091	0.111045			0.40321	9.75098	0.0477304	0.391004	0.330884	1.21675	0.0591161	0.628438	0.502996
LM-JB-6A-17	Fakos	epithermal	epithermal IS	pyrite	subhedral	35.7954	448311	84.1995	576.952	1.09162	1.3331	0.054759	0.593472	266.007	37.7778	0.060692	0.255296	0.013631	0.111013	0.142828	3.76822	0.0282495	0.0101295	2.83189	0.80901	0.145938	13.3401	0.285678	0.316531	0.00357693	0.0504355	0.000720812	0.0214316	0.00960825	0.448671	0.000120304	0.0016963	0.000720812			0.289019	8.84527	0.0499485	0.279668	0.293367	1.3331	0.054759	0.593472	0.299717
LM-JB-6A-18	Fakos	epithermal	epithermal IS	pyrite	euhedral	28.8296	466355	49.6802	247.23	147.356	1.88802	0.0679306	1.2935	435.855	79.4594	367.7	0.293602	0.0176434	0.106882	11.3191	223.469	0.462336	0.0822866	920.175	15.7156	0.200947	0.0863525	0.0170789	0.113983	8.94249e-05	0.0123011	7.40133	0.399598	0.316335	1.59942	0.00165632	0.22784	7.40133			0.284289	10.0791	0.0702799	0.394301	0.231128	1.88802	0.0679306	0.503015	0.323224
LM-JB-7A-04	Fakos	epithermal	epithermal IS	pyrite	subhedral	18.8504	464009	19.6651	40.3854	404.622	31.3706	0.19096	0.815863	662.048	4.06986	14.4986	1.26265	0.282379	0.584237	71.6302	7.07138	0.646972	0.201891	100.492	0.136799	0.486935	0.0404996	0.0013613	0.0297034	0.00200904	0.712798	0.737273	0.144276	0.00695643	0.206959	0.0102665	3.6425	0.737273			0.293101	10.6933	0.041741	0.247027	0.304787	1.07912	0.0585152	0.409976	0.367582
LM-JB-7A-05	Fakos	epithermal	epithermal IS	pyrite	subhedral	16.6767	441734	9.42466	28.9226	1303.1	59.5106	1.06356	0.889554	123.9	2.88333	11.8513	3.55254	0.475352	2.77536	27.1117	4.40712	0.295546	0.164237	61.2641	0.127278	0.325858	0.047064	0.00207753	0.0760666	0.0026808	0.442537	1.25748	0.193446	0.0135048	0.305935	0.0174263	2.87667	1.25748			0.265963	9.14509	0.027264	0.373262	0.230883	1.11197	0.0557569	0.467045	0.346782
LM-JB-7A-06	Fakos	epithermal	epithermal IS	pyrite	subhedral	30.0315	463372	55.0666	284.039	54.9884	4.47829	0.0500808	0.787574	342.284	6.87595	9.3249	0.329351	0.0180156	0.0826489	4.8012	42.4131	0.687653	0.143121	45.7895	0.0249531	0.19387	0.150164	0.000544952	0.16088	0.00312563	0.104854	0.169339	0.203647	0.000453144	0.124866	0.00259905	0.0871889	0.169339			0.277982	7.35748	0.0306238	0.331137	0.325717	0.989942	0.0500808	0.787574	0.352241
LM-JB-7A-07	Fakos	epithermal	epithermal IS	pyrite	subhedral	112.629	464496	69.1906	245.043	20.8419	2.11453	0.175021	0.804715	540.289	4.61163	9.05188	0.231671	0.0123832	0.147167	6.98846	21.9698	2.60082	0.418578	97.4232	0.0533635	0.282361	0.047336	0.000547749	0.128062	0.00429649	0.071733	0.130825	0.0929129	0.000771253	0.066651	0.00604964	0.101003	0.130825			0.233161	8.43603	0.0495433	0.509548	0.267043	1.09773	0.0382903	0.804715	0.314773
LM-JB-7A-13	Fakos	epithermal	epithermal IS	pyrite	subhedral	32.0837	415108	2.88091	18.3541	41.7762	1.47131	0.0769639	0.545971	32.8485	3.26039	4.29353	0.23339	0.0101218	0.113868	3.3651	14.4753	0.429468	0.0825278	67.4046	0.0144684	0.156963	0.0483704	0.00021465	0.0877031	0.00122436	0.0499239	1.49034	0.0636979	0.00502215	1.13172	0.0286464	1.16807	1.49034			0.290354	8.98439	0.0532517	0.295027	0.249942	1.47131	0.0769639	0.328585	0.218602
LM-JB-7A-14	Fakos	epithermal	epithermal IS	pyrite	subhedral	36.4403	443418	6.20899	16.3027	1.5715	1.14408	0.0512826	0.625374	16.8899	4.13914	0.341008	0.137853	0.0178231	0.153975	2.48806	8.56799	0.0278779	0.0451079	49.4187	0.00935935	0.380858	0.0837565	0.000189389	0.367615	0.00091277	0.0503465	0.0549217	0.00690039	0.00150739	0.666636	0.00726493	0.400719	0.0549217			0.260346	6.6743	0.0331353	0.257467	0.230059	1.14408	0.0372579	0.625374	0.172327
LM-JB-7A-15	Fakos	epithermal	epithermal IS	pyrite	subhedral	36.5749	424669	12.9655	33.8078	2.21086	1.52328	0.0555403	0.748629	142.628	4.2867	0.498296	0.21152	0.0105382	0.145086	5.06511	12.7966	0.211515	0.0431923	68.5968	0.00973565	0.383507	0.0624913	0.000141926	0.0909045	0.000629654	0.0738389	0.0384325	0.00726413	0.000750889	0.330624	0.00333132	0.39066	0.0384325			0.24706	7.49314	0.0387576	0.271444	0.3269	1.52328	0.0555403	0.748629	0.279752
LM-JB-7A-16	Fakos	epithermal	epithermal IS	pyrite	euhedral	23.0797	412710	13.2951	31.8981	10.512	1.03325	0.042821	0.400725	69.239	4.50366	1.00722	0.155789	0.00924742	0.111557	0.843522	11.0044	0.0487452	0.0173896	12.6092	0.0158572	0.4168	0.357172	0.00125759	0.192018	0.00137912	0.0668973	0.0757585	0.0798797	0.00119271	0.338745	0.00130796	0.0634459	0.0757585			0.228087	8.48712	0.0395201	0.299205	0.209792	1.03325	0.042821	0.372619	0.225402
LM-JB-7A-17	Fakos	epithermal	epithermal IS	pyrite	euhedral	52.534	431039	83.5753	292.159	15.194	1.73269	0.055224	0.521112	52.2252	5.7876	24.7011	0.183299	0.00546919	0.120024	9.60124	60.4423	2.08073	0.512224	150.339	0.896774	0.286061	0.038497	0.00596501	1.60028	0.00340713	0.0638639	0.295556	0.164303	0.0107301	0.0692502	0.0061289	0.114881	0.295556			0.270922	4.48811	0.0695569	0.311575	0.210681	1.73269	0.055224	0.481581	0.247155
LM-JB-7A-21	Fakos	epithermal	epithermal IS	pyrite	subhedral	116.147	398259	81.7884	363.001	22.0291	2.1962	0.470718	0.46539	508.357	9.19799	4.30356	0.298765	0.00773479	0.0999794	19.6829	59.5665	0.476495	0.728406	170.431	0.180362	0.225312	0.053969	0.00105827	0.160888	0.00427391	0.115489	0.0526182	0.025251	0.00220522	0.112461	0.00890598	0.240656	0.0526182			0.304215	7.53113	0.0379819	0.315993	0.258112	1.47905	0.0394547	0.46539	0.243808
LM-JB-7A-22	Fakos	epithermal	epithermal IS	pyrite	subhedral	28.8235	423640	79.6795	220.604	5.39882	2.02776	1.00172	0.722477	26.0514	10.7823	1.69893	0.176053	0.0134688	0.178107	1.54581	6.15353	0.131644	0.0764197	27.8408	0.0583931	0.361187	0.387283	0.00209739	3.05855	0.00274488	0.0555231	0.021322	0.061023	0.00073285	0.135321	0.000959089	0.0194003	0.021322			0.309365	10.8354	0.0366924	0.450049	0.321141	2.02776	0.0685181	0.722477	0.3789
LM-JB-7A-23	Fakos	epithermal	epithermal IS	pyrite	subhedral	54.2087	414229	2.70812	9.42945	6.55827	2.09456	0.0905524	0.706615	49.6543	3.06466	7.32934	0.155611	0.00701197	0.123637	3.396	16.3843	0.609834	0.0325307	67.3119	0.0100518	0.287199	0.0455292	0.000149332	0.0545396	0.000483284	0.0504517	2.70643	0.108886	0.00371173	1.13165	0.0120123	1.254	2.70643			0.242619	9.49867	0.051234	0.323615	0.291216	2.09456	0.0905524	0.706615	0.348905
LM-JB-7A-24	Fakos	epithermal	epithermal IS	pyrite	subhedral	54.9668	400211	57.235	83.2807	3.33828	2190.55	0.117689	0.622201	364.416	3.74245	1.53028	29.6802	0.0614043	0.0739465	2.46662	37.3478	0.353132	0.0188799	56.0343	0.0463773	0.687254	0.0667884	0.000827659	0.15706	0.000336935	0.0440197	0.0267368	0.0273097	0.000810296	0.0653873	0.000329867	0.0430963	0.0267368			0.281467	6.45113	0.0574675	0.255961	0.190609	0.860295	0.0459892	0.622201	0.203977
LM-JB-7d-01	Fakos	epithermal	epithermal IS	pyrite	anhedral	151.667	504971	8.83998	294.581	6.60214	5.54944	0.142765	1.16957	1274.02	14.165	2.67911	0.398911	0.00904581	0.176295	5.52609	13.0909	0.288173	0.0569907	68.0736	0.0533571	0.0300087	0.208083	0.000783815	0.00693862	0.000837192	0.0811781	0.303068	0.0393562	0.00603589	1.60237	0.00644692	0.625125	0.303068			0.473917	12.6592	0.0743213	0.420435	0.542372	2.09246	0.0784697	1.16957	0.386768
LM-JB-7D-03	Fakos	epithermal	epithermal IS	pyrite	anhedral, cracked	17.0044	497841	37.2448	0.532336	0.605117	1.88323	0.0512659	0.636875	0.279835	141.195	0.027959	0.221633	0.00947981	0.142058	0.093878	0.530779	0.0234176	0.0230175	0.0353968	0.0117328	69.9649	3988.91	0.331464	133.096	0.650272	2.65216	0.000750681	0.789873	0.000315017	3.79099	0.000618006	0.00252057	0.000750681			0.377717	14.2223	0.0738228	0.532336	0.237036	1.88323	0.0512659	0.636875	0.279835
LM-JB-7D-04	Fakos	epithermal	epithermal IS	pyrite	anhedral, cracked	15.9809	502946	1861.28	11.4481	25.2511	1.13682	0.0614599	0.456839	26.581	239.059	0.0169296	0.244918	0.0125649	0.135876	0.0719579	16.4633	0.0225691	0.0238852	0.997726	0.114842	162.584	239.604	0.115104	70.0231	0.0239396	0.0721219	9.09567e-06	0.0169682	6.17006e-05	0.128438	1.28326e-05	3.86603e-05	9.09567e-06			0.380885	7.03693	0.0451413	0.288397	0.201295	1.13682	0.0614599	0.451928	0.195692
LM-JB-7D-05	Fakos	epithermal	epithermal IS	pyrite	anhedral, cracked	15.6464	473950	26.4474	0.519694	179.615	0.921575	0.0547952	0.509129	60.3651	181.446	0.0299258	0.304397	0.00566982	0.130802	0.073355	12.4484	0.031148	0.0256945	0.197231	0.0379767	50.8903	919.969	0.192549	0.438123	0.130276	0.371924	0.00113152	0.15173	0.00143593	6.86066	0.000971533	0.00277362	0.00113152			0.292656	7.92142	0.07096	0.368972	0.386497	0.921575	0.0547952	0.509129	0.227785
LM-JB-7D-06	Fakos	epithermal	epithermal IS	pyrite	anhedral, cracked	19.0799	490259	83.2054	5.04596	122.694	32.4112	0.0493152	0.676497	44.7674	79.304	0.381132	0.971102	0.0595652	0.201034	0.117119	20.7228	0.067893	0.0187026	11.2038	1.79475	16.4895	7.0783	0.160191	1.85862	0.0016693	0.0104535	0.00458061	0.034018	0.0215701	0.953111	0.000224776	0.00140759	0.00458061			0.266142	11.5222	0.057799	0.408027	0.226368	1.45741	0.0493152	0.676497	0.188732
LM-JB-7D-08	Fakos	epithermal	epithermal IS	pyrite	anhedral	17.0781	523908	1.88929	2.5355	7562.72	1.17421	0.0679269	0.541719	0.680833	559.738	7.2366	0.24116	1.0511	0.141966	1.00198	2.97293	0.0363943	0.015882	292.941	5.00828	0.745134	1.91075	0.0170965	2.77497	5.42158e-05	0.0034204	3.83033	0.0247033	2.65088	296.269	0.00840636	0.530345	3.83033			0.277243	10.3174	0.0583445	0.258657	0.248949	0.861417	0.0679269	0.322853	0.243399
LM-JB-7D-09	Fakos	epithermal	epithermal IS	pyrite	anhedral	17.163	513283	5.60766	29.1954	142.424	1.1879	0.0549899	0.45871	5.70166	430.659	0.453504	0.219426	0.0174671	0.11339	0.0681257	0.514209	0.0290356	0.0105442	173.56	1.08847	0.192073	2.48133	0.00627143	0.983513	6.07525e-05	0.000392519	0.0808723	0.00261295	0.194104	76.7984	0.00188032	0.0121487	0.0808723			0.39528	6.7148	0.071674	0.387196	0.164672	1.1879	0.0549899	0.45871	0.2481
LM-JB-7D-12	Fakos	epithermal	epithermal IS	pyrite	anhedral, cracked	17.6376	511409	5.57604	0.375165	5.99276	1.57185	0.0610153	0.694019	0.294947	84.3199	0.0161357	0.142443	0.00736588	0.137162	0.0630129	0.266539	0.0292413	0.0109865	0.0311154	0.0151098	14.8629	2709.91	0.485605	18.9053	0.35309	2.02513	0.00289375	0.518574	0.00270977	15.1218	0.00197031	0.0113006	0.00289375			0.225855	5.22854	0.0379114	0.375165	0.280303	1.57185	0.0610153	0.571213	0.294947
LM-JB-7D-13	Fakos	epithermal	epithermal IS	pyrite	anhedral, cracked	16.0561	521135	7.53798	3.30376	2.75897	1.22713	0.031809	0.603997	0.304141	393.839	0.0391414	0.28558	0.00875971	0.0852642	0.0459808	5.45117	0.0328978	0.0103614	0.14029	0.0307214	2.28164	2807.32	0.218985	24.7845	0.0738569	0.327755	0.00519256	0.279003	0.00407555	52.2473	0.00137456	0.00609988	0.00519256			0.302595	9.41671	0.0553106	0.404601	0.216971	1.22713	0.031809	0.544781	0.304141
LM-JB-7D-14	Fakos	epithermal	epithermal IS	pyrite	subhedral, inclusions	16.7659	494215	0.573944	1.02883	1059.02	1.35781	0.0508209	0.620934	0.271448	136.352	0.139982	0.154562	0.0975182	0.0684063	0.0393309	0.338265	0.027463	0.0101837	1.18247	0.0530067	0.557858	115.311	0.0448269	2.11438	0.0086122	0.0332615	0.243895	0.118381	0.0923552	237.571	0.0177434	0.0685275	0.243895			0.270057	13.5568	0.042238	0.300083	0.273649	1.35781	0.0508209	0.497774	0.271448
LM-JB-7D-15	Fakos	epithermal	epithermal IS	pyrite	subhedral, inclusions	16.8482	521495	1.0809	2.12995	2508.18	2.17019	0.0532435	0.643965	0.222076	94.1127	2.27924	0.506893	1.29482	0.132366	0.0427046	0.740929	0.0353603	0.0132669	161.114	4.61151	0.507475	0.584136	0.0286226	4.86724	8.23446e-05	0.000265058	2.10866	0.0141467	4.26638	87.0692	0.012274	0.0395085	2.10866			0.270093	6.57536	0.0413153	0.466632	0.226392	0.867	0.0532435	0.643965	0.222076
LM-JB-7D-16	Fakos	epithermal	epithermal IS	pyrite	subhedral, inclusions	16.8592	508735	8.36718	12.0851	1683.81	44.6355	0.0461568	0.728054	3.31749	69.7976	25.7244	0.489711	9.18281	0.130212	0.336022	1.4774	1.06535	0.0228793	277.812	12.5236	0.692353	0.251241	0.0450794	2.52215	8.23554e-05	0.00120953	3.07444	0.0925965	1.49675	8.34183	0.00273441	0.0401595	3.07444			0.28784	5.72093	0.0459673	0.601954	0.260699	0.875355	0.0461568	0.728054	0.260246
LM-JB-7D-17	Fakos	epithermal	epithermal IS	pyrite	subhedral, inclusions	22.7575	501049	1.72544	5.27322	61.4669	10.2179	0.0785744	0.548474	4.9259	13.7487	52.8978	0.424469	0.0800434	0.0956544	14.5604	59.7781	0.427644	0.132999	679.944	4.14889	0.327208	0.0202204	0.00610182	0.35028	0.000195604	0.0214142	30.6575	0.0777972	2.40454	7.96825	0.0770814	8.43867	30.6575			0.237706	11.6244	0.0567252	0.301672	0.247014	0.87336	0.0785744	0.548474	0.174082
LM-JB-7D-19	Fakos	epithermal	epithermal IS	pyrite	anhedral, inclusions	16.1896	504190	6.88153	14.7922	8.06466	186.749	0.0838072	0.756082	0.307889	126.409	0.27371	3.27713	8.4941	0.19148	0.0719941	86.2297	0.0592738	0.024129	2.08341	0.711729	0.465213	60.6742	0.341617	22.3507	0.0115815	0.0345559	0.0397746	0.131376	0.103426	18.3693	0.00350635	0.0104619	0.0397746			0.242494	8.20609	0.0502277	0.324322	0.342895	1.06339	0.0789347	0.756082	0.307889
LM-JB-7D-20	Fakos	epithermal	epithermal IS	pyrite	anhedral, inclusions	16.7626	506899	0.0350395	0.362771	17.6733	300.552	0.0598558	0.573513	0.188354	47.3132	1.35485	7.4047	19.8221	0.0943613	0.0495572	6.41034	0.0460349	0.013826	3.78463	1.27082	0.0965885	12.5014	0.335785	0.18603	0.0036532	0.0130943	38.6663	0.357987	36.2683	1350.28	0.394584	1.41432	38.6663			0.321618	7.46951	0.0334382	0.362771	0.36823	1.51954	0.0598558	0.452651	0.188354
LM-JB-7D-23	Fakos	epithermal	epithermal IS	pyrite	subhedral, inclusions	16.6755	531101	27.4078	0.384699	51.7654	1.10465	0.0498258	0.564371	1.46329	70.8629	1.53832	0.266786	0.112386	0.136648	0.0779622	9.80019	0.0224581	0.0191179	5.85972	0.127243	71.2449	12.0932	0.0217149	18.7302	0.0032626	0.0133048	0.056127	0.262524	0.00464259	2.5855	0.000697534	0.00284452	0.056127			0.334088	12.1248	0.0385801	0.384699	0.335942	1.10465	0.0498258	0.564371	0.308845
LM-JB-7D-24	Fakos	epithermal	epithermal IS	pyrite	subhedral, inclusions	15.7698	502147	8.481	0.187204	8.7169	1.23177	0.0351908	0.995467	9.66555	97.8972	0.853714	0.208507	0.0110039	0.135473	0.0886123	15.7907	0.0452077	0.0107676	9.07732	0.0175778	45.3036	10.7848	0.00193645	0.877446	0.00118621	0.00976194	0.100662	0.0940491	0.00207261	11.5431	0.00126961	0.0104483	0.100662			0.260831	8.11322	0.0384475	0.187204	0.294237	1.23177	0.030589	0.995467	0.214123
LM-JB-7D-25	Fakos	epithermal	epithermal IS	pyrite	subhedral, inclusions	17.0505	505580	11.5247	0.312783	12.4199	1.58613	0.0477309	0.829474	5.53578	108.205	0.0185304	0.107005	0.00754103	0.133585	0.0491215	14.4249	0.040099	0.0182317	0.215376	0.00882168	36.8457	502.402	0.0409594	2.08186	0.0846507	0.228073	0.00160789	0.0860376	0.000765459	9.389	0.00158197	0.00426229	0.00160789			0.500863	10.4583	0.027181	0.312783	0.309034	1.58613	0.0477309	0.65084	0.321842
LM-JB-7D-26	Fakos	epithermal	epithermal IS	pyrite	subhedral, inclusions	18.589	497980	1478.7	2.66401	38.8246	1.06738	0.0956747	0.443386	23.2053	62.4049	0.125269	0.108424	0.0090611	0.143702	0.816646	19.8128	0.0299782	0.016474	25.4532	0.451758	555.065	2.45175	0.0177486	63.7223	0.000647227	0.0320842	8.47161e-05	0.00492155	0.000305511	0.0422026	1.11409e-05	0.000552274	8.47161e-05			0.32868	10.7491	0.0594046	0.303674	0.359044	1.06738	0.0956747	0.443386	0.303635
LM-JB-7D-27	Fakos	epithermal	epithermal IS	pyrite	subhedral, inclusions	15.5046	489875	0.0296355	0.352591	30.4685	1.22949	0.055118	0.838579	64.9476	209.228	0.0466158	0.206292	0.0166221	0.0775157	0.0506337	5.23604	0.0449941	0.0184499	2.34742	0.132828	0.0840506	89.131	0.0565848	0.000456298	0.00785968	0.02157	1.57297	0.0198583	4.48206	7060.04	0.622562	1.70855	1.57297			0.212342	7.52012	0.0296355	0.352591	0.321125	1.22949	0.055118	0.585975	0.253251
LM-JB-7D-28	Fakos	epithermal	epithermal IS	pyrite	subhedral, inclusions	16.7067	508115	232.852	0.684003	57.2776	3.53067	0.0549499	0.396425	51.7155	186.5	0.1334	0.222498	0.382466	0.143901	0.0715164	9.37374	0.0305812	0.0168569	5.18391	0.0325418	340.426	35.9766	0.00627746	4.50257	0.00325177	0.0137958	0.000572895	0.0257334	0.000139753	0.800936	7.23931e-05	0.000307132	0.000572895			0.160844	8.66477	0.0297073	0.45413	0.171686	1.07634	0.0549499	0.396425	0.33959
LM-JB-7D-29	Fakos	epithermal	epithermal IS	pyrite	subhedral, inclusions	16.3026	494072	188.936	5.29443	606.199	29.2584	0.0908714	0.593853	98.0738	71.6663	0.526209	1.68611	10.4137	0.280714	0.429215	9.16936	0.07433	0.0097725	78.5734	0.923394	35.6858	0.912094	0.011752	1.92647	0.000124374	0.0054626	0.00278512	0.00669704	0.00488734	0.379315	5.17239e-05	0.00227175	0.00278512			0.239338	10.1876	0.0461849	0.211035	0.239885	2.30144	0.0540141	0.457417	0.290347
LM-JB-7D-30	Fakos	epithermal	epithermal IS	pyrite	subhedral, inclusions	16.3006	510629	0.908463	0.242192	2.34179	0.988217	0.0379026	0.659103	1.38649	83.7317	0.0388865	0.158374	0.00512105	0.0925781	0.0596794	0.206803	0.0425779	0.0169337	0.264927	0.0171354	3.751	316.056	0.0646796	0.655225	0.0639183	0.225267	0.0428047	0.146782	0.0188619	92.1686	0.0186399	0.0656927	0.0428047			0.280759	9.03962	0.0397242	0.242192	0.258308	0.988217	0.0379026	0.659103	0.214145
LM33a_I_py3	Fakos	epithermal	epithermal IS	pyrite		n.a.	431579	61.2942	388.67	20.3307	3.10006	n.a.	n.a.	1511.99	13.2977	13.4275	0.0897362	n.a.	n.a.	4.62575	49.7651	1.14153	0.0472069	84.973	1.39368	0.157702	0.156493	0.0164014	0.0405387	0.000555551	0.0544379	0.219067	0.158021	0.0227375	0.216948	0.000770169	0.0754681	0.219067			n.a.	16.608	0.0373539	0.305225	0.460472	3.10006	n.a.	n.a.	0.385017
LM33a_I_py1	Fakos	epithermal	epithermal IS	pyrite		n.a.	410933	116.794	543.816	4.49945	10.3405	n.a.	n.a.	66.7544	4.35939	0.526549	0.201974	n.a.	n.a.	1.80345	7.20585	0.105969	0.0170486	20.1226	0.15997	0.214768	0.216641	0.00794977	1.74961	0.000847236	0.0896229	0.00450834	0.026167	0.00136968	0.0373253	0.000145971	0.0154412	0.00450834			n.a.	16.6229	0.0394962	0.250388	0.337407	2.30805	n.a.	n.a.	0.326938
LM33a_II_py1	Fakos	epithermal	epithermal IS	pyrite		n.a.	423817	114.292	274.697	6.88046	6.02032	n.a.	n.a.	703.709	29.5476	1.26008	0.0915452	n.a.	n.a.	3.56365	23.2925	1.35911	0.0625243	43.9161	1.29695	0.416064	0.672818	0.0295323	0.162413	0.00142372	0.0811467	0.0110251	0.0286928	0.0113477	0.258528	0.000547059	0.0311804	0.0110251			n.a.	15.3892	0.0365869	0.251548	0.406403	2.47906	n.a.	n.a.	0.196488
LM33a_III_py1	Fakos	epithermal	epithermal IS	pyrite		n.a.	395206	8.01197	329.181	2275.25	62.6075	n.a.	n.a.	2.30311	5.14492	7.51318	1.22574	n.a.	n.a.	3.91955	0.719318	0.0268288	0.0201995	18.2219	0.0239654	0.0243391	0.282347	0.0013152	3.47877	0.00110853	0.2151	0.937744	0.412315	0.0029912	0.642153	0.00252116	0.489211	0.937744			n.a.	19.4934	0.03036	0.207747	0.462363	5.43736	n.a.	n.a.	0.253969
LM33a_III_py3	Fakos	epithermal	epithermal IS	pyrite		n.a.	422151	0.0300305	7.05561	579.03	225.726	n.a.	n.a.	3.12767	3.58328	7.59083	4.30022	n.a.	n.a.	30.83	4.51414	0.158425	0.275312	64.12	0.0105211	0.00425626	0.0558839	0.000164085	0.00960156	0.00429369	0.480817	252.771	0.118385	0.350348	119.321	9.16774	1026.62	252.771			n.a.	16.4325	0.0300305	0.208342	0.516911	2.00024	n.a.	n.a.	0.299528
LM33a_XIII_py1	Fakos	epithermal	epithermal IS	pyrite		n.a.	370165	13.3021	721.463	188.598	33.1988	n.a.	n.a.	351.99	4.49794	62.6907	0.922692	n.a.	n.a.	112.65	12.9695	0.891806	3.89228	308.404	0.0133341	0.0184377	0.0145846	4.32359e-05	0.0377913	0.0126207	0.365268	4.71283	0.203274	0.0010024	0.338136	0.292605	8.46857	4.71283			n.a.	19.7917	0.0374695	0.465805	0.655187	2.98348	n.a.	n.a.	0.513602
LM33a_VIII_py1	Fakos	epithermal	epithermal IS	pyrite		n.a.	382441	0.0587199	3.40093	16.577	1480.39	n.a.	n.a.	0.258102	2.34586	3.37438	10.8381	n.a.	n.a.	1.2044	1.06373	0.115042	0.0071589	20.6065	0.0076038	0.0172658	0.113841	0.000369	0.227507	0.000347409	0.0584472	57.4657	0.163753	0.129493	39.95	0.121916	20.5109	57.4657			n.a.	14.6575	0.0431605	0.253503	0.52005	2.33355	n.a.	n.a.	0.258102
LM33b_III_py6	Fakos	epithermal	epithermal IS	pyrite		n.a.	419026	188.856	228.08	22.3712	4.42816	n.a.	n.a.	262.807	5.94272	0.345695	0.12275	n.a.	n.a.	0.205829	1.77283	0.790566	0.017981	27.4222	3.45637	0.828027	0.216712	0.126043	0.718612	0.000655712	0.00750595	0.00183047	0.0126064	0.0183016	0.0314669	9.52102e-05	0.00108987	0.00183047			n.a.	8.58377	0.0358108	0.211937	0.538624	4.22916	n.a.	n.a.	0.253259
LM33b_X_py1	Fakos	epithermal	epithermal IS	pyrite		n.a.	417083	0.103693	1.68606	67.2355	483.813	n.a.	n.a.	0.236336	3.27751	1.69522	2.3562	n.a.	n.a.	0.0926819	1.20201	0.115565	0.00842076	11.1331	0.00974893	0.0615	0.294394	0.000875673	0.43875	0.000756373	0.00832492	16.3485	0.152269	0.0940177	31.608	0.0812089	0.893815	16.3485			n.a.	13.9184	0.0340594	0.229479	0.534695	4.61298	n.a.	n.a.	0.236336
LM33b_X_py3 (61)	Fakos	epithermal	epithermal IS	pyrite		n.a.	492940	26.9117	600.138	5437.15	1372.3	n.a.	n.a.	218.324	5.8055	2536.88	3.97339	n.a.	n.a.	6.04358	1403.95	373.096	0.0292998	39.2142	0.0178345	0.0448425	0.148046	0.000454797	0.123265	0.000747174	0.154117	94.2667	64.6929	0.000662703	0.215724	0.00108874	0.224571	94.2667			n.a.	55.294	0.0656144	1.29706	1.78459	11.7477	n.a.	n.a.	0.587479
LM33b_III_py9 (170)	Fakos	epithermal	epithermal IS	pyrite		n.a.	422534	43.0964	415.523	619.324	912.406	n.a.	n.a.	20.6934	6.03453	1236.05	11.1015	n.a.	n.a.	11.4961	1630.26	219.135	0.0284052	182.719	0.0443988	0.103716	0.0330263	0.00024299	2.08261	0.000155458	0.0629169	28.6811	6.76477	0.00103022	0.140024	0.000659108	0.266753	28.6811			n.a.	13.5189	0.0288933	0.415593	0.581365	4.06986	n.a.	n.a.	0.301699
LM33b_III_py5	Fakos	epithermal	epithermal IS	pyrite		n.a.	450672	1.51883	8.64878	23.3892	601.149	n.a.	n.a.	4.16739	3.67765	14.4531	4.91046	n.a.	n.a.	1.25239	52.2379	0.144813	0.0159123	82.7354	0.0401718	0.175612	0.0444508	0.000485545	0.364455	0.000192327	0.0151373	9.51599	0.174691	0.0264492	2.42137	0.0104767	0.824577	9.51599			n.a.	13.3812	0.0524535	0.255277	0.743092	3.16581	n.a.	n.a.	0.377309
LM33b_III_py4	Fakos	epithermal	epithermal IS	pyrite		n.a.	421515	0.394717	43.684	33.9009	71.2611	n.a.	n.a.	0.354425	5.1636	0.971166	3.22741	n.a.	n.a.	0.137074	71.4461	0.0338022	0.0147784	0.751197	0.00939033	0.00903574	6.87383	0.0125005	1.11368	0.0196731	0.182474	2.46041	1.29283	0.02379	13.0818	0.0374404	0.347272	2.46041			n.a.	14.4682	0.0342033	0.194296	0.437184	3.02703	n.a.	n.a.	0.354425
LM33b_III_py2	Fakos	epithermal	epithermal IS	pyrite		n.a.	378958	1.74622	10.6548	17.7398	530.494	n.a.	n.a.	0.268611	2.75669	1.12869	2.58371	n.a.	n.a.	0.179185	1.03002	0.058149	0.00969747	5.1724	0.00743482	0.16389	0.532962	0.0014374	6.50092	0.00187485	0.0346425	0.646364	0.218214	0.00425767	1.57866	0.00555342	0.102613	0.646364			n.a.	13.6783	0.0449843	0.25139	0.601948	3.40178	n.a.	n.a.	0.248569
LM33b_II_py2	Fakos	epithermal	epithermal IS	pyrite		n.a.	418514	3.8851	210.871	40951.2	155.109	n.a.	n.a.	129.578	4.02343	125.115	2.62814	n.a.	n.a.	39.7233	49.7166	0.462683	0.888681	969.815	0.17273	0.0184241	0.00414866	0.000178106	0.0299826	0.00091634	0.0409597	32.2039	0.129009	0.0444596	1.03561	0.228741	10.2245	32.2039			n.a.	48.4526	0.0846343	0.701387	1.29418	7.75379	n.a.	n.a.	0.923573
LM33b_IV_py10	Fakos	epithermal	epithermal IS	pyrite		n.a.	436712	23.8862	269.728	92.3409	110.9	n.a.	n.a.	22.2294	17.0535	104.298	0.382916	n.a.	n.a.	16.1231	90.6638	0.902691	0.525558	7818	2.13621	0.0885563	0.00218131	0.000273243	1.07453	6.72241e-05	0.00206231	4.36645	0.0133407	0.0894331	0.713947	0.0220026	0.674998	4.36645			n.a.	15.9811	0.0330602	0.334295	0.623822	3.25271	n.a.	n.a.	0.218433
LM33b_IV_py8	Fakos	epithermal	epithermal IS	pyrite		n.a.	414506	0.153755	0.624475	88.6564	407.504	n.a.	n.a.	0.445055	4.92489	1.57133	2.39104	n.a.	n.a.	0.17826	0.509886	0.0754723	0.00929775	9.77591	0.00969658	0.246215	0.503778	0.000991885	0.345474	0.000951088	0.0182346	10.2197	0.160735	0.063065	32.0307	0.0604711	1.15938	10.2197			n.a.	13.537	0.0438619	0.229891	0.760751	3.19323	n.a.	n.a.	0.229445
LM33b_IV_py4	Fakos	epithermal	epithermal IS	pyrite		n.a.	430408	4.20228	1820.89	116.458	3.24742	n.a.	n.a.	2164.53	6.71763	1.90252	0.128106	n.a.	n.a.	21.3278	13.086	2.35093	0.0592654	1234.69	0.262346	0.00230782	0.00544074	0.000212479	0.00194143	4.80003e-05	0.0172738	0.452736	0.00154089	0.0624295	1.59857	0.0141032	5.07531	0.452736			n.a.	13.9932	0.0298493	0.128818	0.428783	3.24742	n.a.	n.a.	0.156664
LM33b_XI_py5 (154)	Fakos	epithermal	epithermal IS	pyrite		n.a.	413649	26.8455	905.713	170.831	480.43	n.a.	n.a.	50.2004	6.15408	1085.75	2.29545	n.a.	n.a.	8.34018	857.869	71.2433	0.0169818	65.0493	0.016847	0.0296401	0.0946064	0.000258988	0.534765	0.00026106	0.128213	40.4444	16.6912	0.000627554	0.229241	0.000632575	0.310674	40.4444			n.a.	15.3276	0.0339274	0.278985	0.527522	3.21092	n.a.	n.a.	0.264598
LM33b_XI_py1 (150)	Fakos	epithermal	epithermal IS	pyrite		n.a.	431455	15.9343	264.239	243.447	8.34724	n.a.	n.a.	11.0646	5.56379	517.966	0.148376	n.a.	n.a.	2.036	576.044	36.8152	0.0273142	367.491	0.0946646	0.0603028	0.0151399	0.000257597	1.44012	7.43261e-05	0.00554027	32.5063	1.40946	0.00594092	0.34917	0.00171417	0.127774	32.5063			n.a.	16.9575	0.0387823	0.192004	0.639084	3.37758	n.a.	n.a.	0.295176
LM64_I_py7	Fakos	porphyry	sercicitic	pyrite		n.a.	464335	9.89023	168.237	26.6747	6.2637	n.a.	n.a.	1.57531	134.602	10.072	0.411169	n.a.	n.a.	0.857881	11.8656	1.63171	0.0419805	44.2881	2.70419	0.0587876	3.03925	0.0610592	6.27826	0.000947897	0.0193705	1.01838	0.22742	0.273421	13.6096	0.00424464	0.0867402	1.01838			n.a.	40.056	0.0586233	0.541892	0.785922	6.2637	n.a.	n.a.	0.457151
LM64_I_py8	Fakos	porphyry	sercicitic	pyrite		n.a.	454129	21.7447	122.124	5.85716	3.58619	n.a.	n.a.	2.63816	94.3649	3.59956	0.186186	n.a.	n.a.	0.751872	2.90849	0.361917	0.0161309	3.01826	0.212062	0.178054	31.2647	0.0702596	8.24238	0.00534443	0.249108	0.165537	1.19259	0.00975233	4.33967	0.000741829	0.0345772	0.165537			n.a.	40.2394	0.0668619	0.474939	0.527356	3.58619	n.a.	n.a.	0.355345
LM64_II_py7	Fakos	porphyry	sercicitic	pyrite		n.a.	469155	60.8115	442.468	2.90157	4.44752	n.a.	n.a.	5.09	66.6489	0.057785	0.168647	n.a.	n.a.	0.330723	6.25926	0.0223796	0.0116104	0.669133	0.491774	0.137437	99.6048	0.734942	11.9473	0.0173515	0.494256	0.000950232	0.086358	0.00808687	1.09599	0.000190925	0.0054385	0.000950232			n.a.	21.632	0.0525071	0.326894	0.575626	4.44752	n.a.	n.a.	0.278344
LM64_II_py6	Fakos	porphyry	sercicitic	pyrite		n.a.	495110	47.4193	201.726	1909.21	3.9816	n.a.	n.a.	2663.88	38.796	0.8779	0.229217	n.a.	n.a.	15.8526	43.8247	0.534965	0.0894072	68.0857	19.5819	0.235067	0.569811	0.287606	0.0178008	0.00131316	0.232833	0.0185136	0.012894	0.412952	0.818149	0.00188546	0.334307	0.0185136			n.a.	19.8953	0.0324672	0.288155	0.672952	3.9816	n.a.	n.a.	0.289646
LM64_II_py2.3	Fakos	porphyry	sercicitic	pyrite		n.a.	462390	16.3317	111.523	4.14906	5.08123	n.a.	n.a.	0.676478	48.0654	2.00322	0.2662	n.a.	n.a.	0.177743	25.3735	1.13208	0.0346736	4.30628	4.94959	0.146443	11.1617	1.14939	24.1423	0.00805186	0.0412753	0.122658	0.465186	0.303065	2.94307	0.00212308	0.0108833	0.122658			n.a.	28.3514	0.0439042	0.445473	0.682152	5.08123	n.a.	n.a.	0.345664
LM64_II_py2.2	Fakos	porphyry	sercicitic	pyrite		n.a.	474418	188.7	555.19	15.0295	3.88573	n.a.	n.a.	10.0968	50.1984	0.465761	0.239047	n.a.	n.a.	1.35932	55.5887	0.70267	0.126879	62.8799	6.06098	0.339883	0.798322	0.0963897	18.689	0.00201779	0.0216177	0.00246827	0.00740715	0.0321197	0.266023	0.000672384	0.00720362	0.00246827			n.a.	21.7297	0.0735296	0.336724	0.75168	3.88573	n.a.	n.a.	0.288666
LM64_II_py2.1	Fakos	porphyry	sercicitic	pyrite		n.a.	506618	192.586	713.469	15.5645	3.08022	n.a.	n.a.	13.9671	82.8357	0.898808	0.336795	n.a.	n.a.	1.26808	29.5994	0.212964	0.0258809	29.1079	0.398206	0.26993	2.84581	0.0136803	13.7885	0.000889137	0.0435647	0.00466704	0.0308784	0.00206768	0.430122	0.000134386	0.00658446	0.00466704			n.a.	26.839	0.0359838	0.265161	0.743391	3.08022	n.a.	n.a.	0.180838
LM64_III_py4	Fakos	porphyry	sercicitic	pyrite		n.a.	413648	157.547	412.46	8.65714	5.18288	n.a.	n.a.	9.09159	103.72	0.42646	0.217569	n.a.	n.a.	2.9188	47.5918	0.285852	0.0262218	9.39655	7.22312	0.381968	11.0381	0.768699	17.3288	0.00279058	0.310625	0.00270688	0.0453847	0.0458475	0.658342	0.000166439	0.0185266	0.00270688			n.a.	17.4905	0.0565795	0.283668	0.601053	5.18288	n.a.	n.a.	0.36728
LM64_III_py5	Fakos	porphyry	sercicitic	pyrite		n.a.	547134	238.733	603.413	6.00551	4.56089	n.a.	n.a.	7.22985	88.956	10.5622	0.294227	n.a.	n.a.	0.28049	12.8029	0.397931	0.0219933	5.23636	0.241681	0.395638	16.9881	0.0461544	33.0205	0.00420012	0.0535658	0.0442427	2.01709	0.00101235	0.372617	9.21252e-05	0.00117491	0.0442427			n.a.	39.6184	0.0795382	0.497813	1.02449	4.56089	n.a.	n.a.	0.601082
LM64_V_py_2	Fakos	porphyry	sercicitic	pyrite		n.a.	504860	1.59344	31.4637	2.76671	3.184	n.a.	n.a.	1.95186	156.412	0.0322234	0.145474	n.a.	n.a.	0.0920832	4.33358	0.0220984	0.0167324	0.691363	0.466961	0.0506437	226.237	0.675421	0.81637	0.024202	0.133191	0.0202226	0.0466085	0.293053	98.1602	0.0105008	0.057789	0.0202226			n.a.	19.4891	0.0274566	0.55602	0.705629	3.184	n.a.	n.a.	0.251652
LM64_V_py_9	Fakos	porphyry	sercicitic	pyrite		n.a.	447101	53.7158	518.766	5.05417	4.43057	n.a.	n.a.	1.58429	103.95	0.0362608	0.285718	n.a.	n.a.	0.0787278	2.72526	0.0328598	0.0131096	1.74672	0.226473	0.103545	59.5115	0.129656	33.9052	0.00750526	0.0450718	0.00067505	0.0207594	0.00421614	1.93518	0.000244054	0.00146564	0.00067505			n.a.	25.8271	0.0458048	0.269845	0.853309	4.43057	n.a.	n.a.	0.275213
LM64_V_py_6	Fakos	porphyry	sercicitic	pyrite		n.a.	462961	94.8712	721.481	1.60948	2.78946	n.a.	n.a.	2.93288	186.558	0.150701	0.108041	n.a.	n.a.	0.511674	3.91659	0.0285826	0.0164398	0.714037	0.272306	0.131495	261.272	0.381361	32.3475	0.0230237	0.716593	0.00158848	0.211054	0.00287027	1.96644	0.000173285	0.00539336	0.00158848			n.a.	23.5607	0.0424915	0.381641	0.646358	2.78946	n.a.	n.a.	0.258208
LM64_V_py_3	Fakos	porphyry	sercicitic	pyrite		n.a.	564193	6.60105	169.561	3.23433	5.50263	n.a.	n.a.	3.14359	250.434	1.02982	0.149394	n.a.	n.a.	0.640084	9.85976	0.0999766	0.0230276	475.193	2.50178	0.0389302	0.527016	0.00526477	2.09984	4.84594e-05	0.001347	0.156008	0.00216716	0.378998	37.9385	0.00348847	0.096967	0.156008			n.a.	37.1203	0.0625632	0.441092	1.05881	5.44413	n.a.	n.a.	0.189457
LM64_VI_py6	Fakos	porphyry	sercicitic	pyrite		n.a.	482849	137.713	918.509	4.50244	4.13012	n.a.	n.a.	3.24402	60.043	0.10421	0.34781	n.a.	n.a.	0.0787774	8.32255	0.0357353	0.015278	10.1197	0.876392	0.149931	5.93328	0.0866025	42.4514	0.00150973	0.00778455	0.000756719	0.0102977	0.00636389	0.436001	0.000110941	0.000572039	0.000756719			n.a.	33.84	0.0372318	0.416025	1.08001	4.13012	n.a.	n.a.	0.550606
LM64_VI_py5	Fakos	porphyry	sercicitic	pyrite		n.a.	528138	59.2429	149.395	9.53361	5.79789	n.a.	n.a.	10.1616	272.641	0.3352	0.188297	n.a.	n.a.	1.81225	14.7384	0.493389	0.0213946	18.2353	2.37598	0.396551	14.9513	0.130296	5.8301	0.00117325	0.0993817	0.00565806	0.018382	0.0401058	4.60209	0.000361134	0.0305902	0.00565806			n.a.	31.7535	0.0595255	0.404208	0.619386	5.79789	n.a.	n.a.	0.310137
LM64_VI_py4	Fakos	porphyry	sercicitic	pyrite		n.a.	581810	217.548	293.34	41.8705	5.77814	n.a.	n.a.	40.5753	202.02	1.3774	0.132897	n.a.	n.a.	7.4432	45.191	1.5514	0.058417	45.5318	1.37023	0.741627	4.4369	0.0300939	5.36159	0.00128299	0.163473	0.00633146	0.0302513	0.00629851	0.928622	0.000268524	0.034214	0.00633146			n.a.	34.6799	0.0541779	0.466097	0.870156	5.77814	n.a.	n.a.	0.304943
LM64_VII_py1	Fakos	porphyry	sercicitic	pyrite		n.a.	447863	43.568	290.067	0.865085	5.95267	n.a.	n.a.	8.4067	141.487	0.036803	0.0954902	n.a.	n.a.	0.103269	0.391376	0.0149684	0.0141132	0.158048	0.0121301	0.1502	895.22	0.0767497	5.18253	0.089297	0.653403	0.000844725	0.23286	0.000278418	3.24751	0.000323935	0.00237029	0.000844725			n.a.	32.3538	0.0523601	0.406929	0.470907	5.95267	n.a.	n.a.	0.361125
LM64_VII_py5	Fakos	porphyry	sercicitic	pyrite		n.a.	466311	7.18194	115.336	0.824387	4.3216	n.a.	n.a.	7.57375	176.683	0.0666324	0.175717	n.a.	n.a.	0.155102	1.24857	0.862802	0.0149865	2.2016	0.701597	0.0622696	80.2519	0.318676	0.948267	0.00680711	0.0704498	0.00927778	0.0302655	0.0976891	24.601	0.0020867	0.0215962	0.00927778			n.a.	23.444	0.0584124	0.419534	0.73136	4.3216	n.a.	n.a.	0.293915
LM64_VII_py7	Fakos	porphyry	sercicitic	pyrite		n.a.	522908	332.913	396.056	4.73512	3.6125	n.a.	n.a.	85.0329	127.576	0.289509	0.182979	n.a.	n.a.	0.836951	35.7115	0.181827	0.0594731	30.5321	0.39051	0.840571	4.17842	0.0127902	3.91511	0.00194789	0.0274122	0.000869625	0.00948213	0.00117301	0.383211	0.000178645	0.00251403	0.000869625			n.a.	25.0448	0.0378817	0.460774	0.592928	3.6125	n.a.	n.a.	0.284094
LM64_VIII_py5	Fakos	porphyry	sercicitic	pyrite		n.a.	518187	51.7246	120.103	3.78793	3.97069	n.a.	n.a.	4.55823	125.023	0.112384	0.196013	n.a.	n.a.	0.739209	12.1058	0.111165	0.0105387	12.968	1.44456	0.430668	9.64088	0.111395	11.3475	0.000812675	0.0570027	0.00217274	0.00866628	0.027928	2.41708	0.000203747	0.0142913	0.00217274			n.a.	15.8783	0.0461011	0.484728	0.521001	3.97069	n.a.	n.a.	0.346977
LM64_VIII_py6	Fakos	porphyry	sercicitic	pyrite		n.a.	477736	260.561	874.929	34.4329	2.56387	n.a.	n.a.	7.27252	114.566	0.309591	0.102286	n.a.	n.a.	0.464441	70.9209	0.393853	0.0682869	27.0886	11.6701	0.297808	4.22931	0.43081	35.8282	0.00252087	0.0171453	0.00118817	0.0114288	0.0447881	0.439689	0.000262076	0.00178247	0.00118817			n.a.	19.258	0.0451586	0.419234	0.535459	2.56387	n.a.	n.a.	0.160359
LM64_VIII_py3	Fakos	porphyry	sercicitic	pyrite		n.a.	500624	99.8626	292.527	4.07749	4.21926	n.a.	n.a.	10.2885	163.877	0.801523	0.276007	n.a.	n.a.	1.57289	5.39113	0.170746	0.0224776	3.36681	0.278486	0.341379	48.6742	0.0827153	9.70625	0.00667624	0.467176	0.00802625	0.238066	0.0027887	1.64102	0.000225085	0.0157506	0.00802625			n.a.	13.1663	0.0398801	0.180437	1.31065	4.21926	n.a.	n.a.	0.652488
LM64_VIII_py2	Fakos	porphyry	sercicitic	pyrite		n.a.	467761	27.7511	174.179	5.52585	143.81	n.a.	n.a.	7.66771	92.6807	0.292535	0.21039	n.a.	n.a.	0.315022	13.5902	0.641973	0.0116393	7.11661	1.23305	0.159325	13.0232	0.173264	3.61921	0.00163551	0.0442657	0.0105414	0.0411059	0.0444325	3.33972	0.000419417	0.0113517	0.0105414			n.a.	34.2601	0.0730168	0.529241	0.884715	5.68642	n.a.	n.a.	0.383437
LM64_IX_py1.3	Fakos	porphyry	sercicitic	pyrite		n.a.	434376	17.0198	69.3701	5.09552	7.92524	n.a.	n.a.	2.77782	164.472	0.0593863	0.225132	n.a.	n.a.	0.195073	1.8201	0.0224841	0.00681608	4.84517	0.0104956	0.245348	33.9457	0.0021662	6.12704	0.00140678	0.0402614	0.00348925	0.0122568	0.000616668	9.66359	0.000400479	0.0114615	0.00348925			n.a.	24.5451	0.0502939	0.412408	0.616677	7.92524	n.a.	n.a.	0.267903
LM64_IX_py1.4	Fakos	porphyry	sercicitic	pyrite		n.a.	466825	32.606	142.619	1.8355	2.75603	n.a.	n.a.	2.86329	440.194	0.0438277	0.315625	n.a.	n.a.	0.0894717	1.67757	0.0359128	0.0120245	0.492783	0.0174225	0.228623	893.282	0.0353553	11.3876	0.0244012	0.181564	0.00134416	0.0889392	0.000534334	13.5004	0.000368781	0.00274403	0.00134416			n.a.	38.5265	0.0414967	0.471896	1.18032	2.75603	n.a.	n.a.	0.268337
LM64_IX_py1.4	Fakos	porphyry	sercicitic	pyrite		n.a.	474880	76.4332	681.052	306.983	3.65262	n.a.	n.a.	15.587	475.623	0.0509643	0.15123	n.a.	n.a.	0.318842	5.5521	0.0286609	0.0187637	5.70401	0.228133	0.112228	83.3839	0.0399952	4.90364	0.00328957	0.0558978	0.000666783	0.00893482	0.00298474	6.22272	0.000245492	0.0041715	0.000666783			n.a.	17.7994	0.0510971	0.279928	0.753792	3.65262	n.a.	n.a.	0.27725
LM64_X_py1	Fakos	porphyry	sercicitic	pyrite		n.a.	474007	108.602	279.195	1.02986	5.44466	n.a.	n.a.	1.35443	173.18	0.0427408	0.164077	n.a.	n.a.	0.205888	3.81195	0.0201828	0.0113894	0.789364	0.140917	0.388982	219.392	0.17852	80.1826	0.0144286	0.260828	0.000393556	0.054146	0.00129756	1.59464	0.000104873	0.00189581	0.000393556			n.a.	24.6532	0.0533666	0.393142	1.01044	5.44466	n.a.	n.a.	0.289072
LM64_X_py6	Fakos	porphyry	sercicitic	pyrite		n.a.	507164	120.475	317.048	5.81776	3.69231	n.a.	n.a.	6.90318	175.028	0.236808	0.186735	n.a.	n.a.	1.41528	24.6387	0.21214	0.0147827	8.6549	0.672822	0.37999	20.223	0.0777388	17.4521	0.00170801	0.163524	0.00196562	0.0273612	0.00558474	1.45282	0.000122703	0.0117475	0.00196562			n.a.	33.3838	0.0394615	0.357036	0.58936	3.69231	n.a.	n.a.	0.358814
LM64_XII_py1	Fakos	porphyry	sercicitic	pyrite		n.a.	459699	40.4528	214.034	6.54645	4.16528	n.a.	n.a.	8.30195	265.197	1.11197	0.175544	n.a.	n.a.	0.155928	17.9388	0.520921	0.016638	3.65286	1.09573	0.189001	72.6	0.299964	4.87268	0.00455479	0.0426867	0.027488	0.30441	0.0270866	6.55573	0.000411294	0.00385458	0.027488			n.a.	17.9117	0.0504184	0.28	0.616584	4.16528	n.a.	n.a.	0.18881
LM64_XII_py3	Fakos	porphyry	sercicitic	pyrite		n.a.	511028	59.4257	216.19	11.4494	8.58957	n.a.	n.a.	10.4796	233.962	2.00881	0.403591	n.a.	n.a.	2.77554	25.2615	0.350947	0.0269826	28.2356	3.07227	0.274877	8.28607	0.108808	5.67058	0.000955624	0.0982995	0.0338038	0.0711448	0.0516993	3.93705	0.000454056	0.0467061	0.0338038			n.a.	31.1654	0.0766448	0.413827	1.19708	8.58957	n.a.	n.a.	0.571029
LM-JB-7a-01	Fakos	epithermal	epithermal IS	spahlerite	anhedral	2978.41	5903.21	4.78776	0.345178	7546.39	597328	1.4953	1.15143	0.410453	2.87891	9.11365	3839.07	0.667863	0.182202	0.897532	0.550535	0.0335711	0.0208953	8.70796	0.0299994	13.8704	0.330607	0.00344506	11.6646	0.00239957	0.10307	1.90353	1.04659	0.00626585	0.601306	0.00436432	0.187464	1.90353			0.277683	11.3744	0.052566	0.345178	0.289916	2.2348	0.0675127	1.15143	0.410453
LM-JB-7a-08	Fakos	epithermal	epithermal IS	spahlerite	anhedral	3748.33	5991.95	18.4988	0.463308	6439.82	597372	2.32726	0.707725	0.464019	2.10563	11.4736	3668.27	2.07694	3.05034	0.863179	2.05741	0.0359996	0.0188482	6.21207	0.017321	39.9276	0.338958	0.00278828	39.8664	0.00303413	0.138952	0.620236	1.84699	0.000936331	0.113825	0.00101889	0.0466613	0.620236			0.464653	14.0762	0.0407442	0.463308	0.389955	1.15613	0.0928619	0.707725	0.464019
LM-JB-7a-09	Fakos	epithermal	epithermal IS	spahlerite	anhedral	4884.32	5668.97	20.6785	1.51554	7180.75	577025	2.23968	0.985067	0.508293	2.22035	14.9909	3679.04	0.259245	1.76409	0.12734	0.426095	0.0307778	0.017835	0.265229	0.0193809	13.6443	8.37143	0.0730723	40.6821	0.0672439	0.480111	0.724951	56.5204	0.000937252	0.107375	0.000862494	0.00615808	0.724951			0.306806	12.7403	0.0483024	0.575673	2.05186	1.1331	0.06099	0.985067	0.508293
LM-JB-7a-10	Fakos	epithermal	epithermal IS	spahlerite	anhedral	3434.61	8270.21	17.4825	0.914725	9286.35	588819	1.78261	0.683173	0.453201	3.65213	21.3761	3848.19	0.4677	0.190517	21.2971	0.676589	0.0794038	0.0964515	11.3437	0.0157994	19.1123	0.321953	0.0013928	38.5756	0.00850267	1.87745	1.22271	1.88441	0.000903725	0.208901	0.00551702	1.2182	1.22271			0.458807	12.4777	0.0634068	0.368782	0.429481	1.77599	0.0760063	0.683173	0.453201
LM-JB-7a-11	Fakos	epithermal	epithermal IS	spahlerite	anhedral	5779.92	7823.03	11.1034	1.22271	6348.43	708995	5.86053	0.555722	1.72423	2.20358	13.7854	4036.5	0.520094	1.45013	10.207	0.522207	0.0459719	0.0341675	3.1921	0.0283644	9.08099	0.690323	0.00888581	6.43966	0.0107038	3.19757	1.24155	4.31861	0.00255456	0.198459	0.0030772	0.919261	1.24155			0.254227	11.4797	0.0547667	0.401941	0.239319	1.80093	0.101392	0.555722	0.612792
LM-JB-7a-12	Fakos	epithermal	epithermal IS	spahlerite	anhedral	3650.32	6984.49	15.4286	0.873614	7126.31	599618	4.63918	0.777774	0.407708	2.97824	14.2067	3638.66	2.10731	2.67857	0.15812	0.455685	0.0584806	0.0232523	0.575189	0.022882	17.6607	5.17785	0.0397818	37.8423	0.0404255	0.2749	0.920803	24.6992	0.00148309	0.193033	0.00150709	0.0102485	0.920803			0.312477	13.9802	0.0577805	0.456352	0.250626	1.48874	0.106597	0.777774	0.407708
LM-JB-7a-18	Fakos	epithermal	epithermal IS	spahlerite	anhedral	1631.04	5388.42	1.824	0.351408	896.376	585083	0.494993	1.00245	0.273198	2.32852	2.77571	3496.47	0.0704009	0.36145	0.0878262	0.27061	0.0272692	0.0173118	0.17023	0.0129451	5.19054	13.6787	0.0760447	6.67648	0.101697	0.515927	1.52177	16.3057	0.0070971	1.2766	0.00949115	0.0481504	1.52177			0.264949	9.2286	0.0663165	0.351408	0.379756	1.99154	0.100605	1.00245	0.273198
LM-JB-7a-19	Fakos	epithermal	epithermal IS	spahlerite	anhedral	863.683	5475.81	63.4412	0.679339	2908.45	579416	1.35456	0.720111	0.441993	2.4972	2.79816	3697.49	1.74235	0.086784	1.33786	0.482751	0.0268749	0.0422556	1.15397	0.01759	93.3865	2.16402	0.0152431	143.534	0.0366178	1.15936	0.0441064	2.42482	0.000277265	0.0393625	0.00066606	0.0210883	0.0441064			0.243275	9.36791	0.0287133	0.472622	0.229975	2.12179	0.0666869	0.720111	0.441993
LM-JB-7a-20	Fakos	epithermal	epithermal IS	spahlerite	anhedral	1476.4	4803.04	60.2299	0.379609	1802.97	580644	0.917769	0.903732	0.415385	2.17771	3.76051	3505.84	0.916618	2.17047	0.104701	0.480886	0.0333383	0.0170242	0.111638	0.0175726	158.663	19.5068	0.157406	144.998	0.152494	0.937856	0.0624359	33.6847	0.000291758	0.0361566	0.000282654	0.00173835	0.0624359			0.319627	7.47768	0.0294815	0.379609	0.255886	1.9756	0.0862682	0.903732	0.415385
LM-27B	Fakos	epithermal	epithermal IS	spahlerite	anhedral	n.a.	5703.91	85.6768	2.14881	1904.96	827636	n.a.	n.a.	0.68548	7.77043	3.07911	3848.56	n.a.	n.a.	0.079845	0.438411	0.0357424	0.0265895	1.13634	0.0135778	39.8718	6.83811	0.0119487	124.988	0.0233992	0.0702649	0.0359387	2.70967	0.000158477	0.0906946	0.000310346	0.000931932	0.0359387			n.a.	24.2696	0.0742806	0.452541	1.44834	3.7057	n.a.	n.a.	0.68548
LM-27B	Fakos	epithermal	epithermal IS	spahlerite	anhedral	n.a.	5832.58	89.0116	1.53622	2374.38	838811	n.a.	n.a.	0.500359	3.87949	5.2408	3779.71	n.a.	n.a.	0.103246	0.268183	0.0360712	0.0104967	0.651745	0.0154869	57.9421	5.95247	0.0237623	177.895	0.0161055	0.158414	0.0588778	8.04119	0.000173988	0.0435841	0.000117925	0.00115991	0.0588778			n.a.	19.6261	0.0464341	0.431477	0.962779	8.25586	n.a.	n.a.	0.327862
LM27B_VI_sp1	Fakos	epithermal	epithermal IS	spahlerite	anhedral	n.a.	9939.04	51.0557	2.7749	9523.02	889953	n.a.	n.a.	2.75873	3.80618	18.4701	4778.48	n.a.	n.a.	0.80288	0.615043	0.0381633	0.0207416	1.64102	0.0185089	18.3991	2.3194	0.0112789	18.5069	0.0126395	0.489256	0.361763	11.2552	0.000362523	0.0745496	0.000406255	0.0157256	0.361763			n.a.	34.5574	0.0888709	0.596748	1.39611	6.04129	n.a.	n.a.	0.983572
LM-27B	Fakos	epithermal	epithermal IS	spahlerite	anhedral	n.a.	10621.8	22.0927	2.84436	11312.2	821133	n.a.	n.a.	0.539442	2.61763	14.7327	4154.84	n.a.	n.a.	0.0707207	0.461241	0.0379518	0.0182757	1.48904	0.0167992	7.76722	1.75793	0.0112819	40.9548	0.0122735	0.047494	0.666859	9.89409	0.000760395	0.118484	0.000827227	0.00320108	0.666859			n.a.	25.5456	0.0511643	0.580311	0.673146	4.62332	n.a.	n.a.	0.539442
LM-27B	Fakos	epithermal	epithermal IS	spahlerite	anhedral	n.a.	8702.29	69.4337	3.58266	9197.29	820204	n.a.	n.a.	0.431091	3.37746	9.6522	4065.76	n.a.	n.a.	0.462647	0.446507	0.042421	0.103112	5.12355	0.016548	19.3805	0.659204	0.00322979	161.065	0.0201251	0.090298	0.139013	1.88389	0.000238328	0.048643	0.00148504	0.00666314	0.139013			n.a.	19.814	0.0543389	0.326883	0.85737	5.12684	n.a.	n.a.	0.296231
LM-27B	Fakos	epithermal	epithermal IS	spahlerite	anhedral	n.a.	7566.58	73.6746	1.97391	8361.88	818615	n.a.	n.a.	0.383478	3.9831	15.0223	3939.87	n.a.	n.a.	19.1945	0.581881	0.0337299	0.12848	2944.97	1.51007	37.3242	0.00135251	0.000512764	192.122	4.3627e-05	0.00651771	0.203901	0.00510102	0.0204965	0.0540633	0.00174389	0.26053	0.203901			n.a.	20.1021	0.0457769	0.334277	0.607536	4.3825	n.a.	n.a.	0.383478
LM-27B-72	Fakos	epithermal	epithermal IS	spahlerite	anhedral	2247.88	5465.24	31.8371	0.504601	7292.24	687021	7.28138	0.277411	2.17802	1.1489	7.36714	3420.23	2.01627	1.47929	1.23391	1.14685	0.320909	0.131962	1082.29	0.122153	63.0937	0.00106155	0.000112866	14.6175	0.000121929	0.0011401	0.231401	0.00680702	0.0038368	0.0360869	0.00414489	0.038757	0.231401			0.120834	6.01511	0.017253	0.179411	0.100708	2.15695	0.0242151	0.262022	0.479236
LM-27B-71	Fakos	epithermal	epithermal IS	spahlerite	anhedral	6265.25	13208.3	18.0654	1.13539	18120.4	662513	2.19896	0.28853	0.538398	3.05633	2.20298	3035.3	2.61814	6.41843	0.746328	0.203924	0.0433268	0.0583189	8.011	0.0047788	15.9112	0.381517	0.000596529	33.554	0.00727985	0.0931629	0.121945	0.274995	0.000264527	0.169182	0.00322821	0.0413125	0.121945			0.150191	5.7466	0.0155052	0.112737	0.161379	3.40258	0.0310147	0.28853	0.488988
LM-27B-74	Fakos	epithermal	epithermal IS	spahlerite	anhedral	4627.23	5549.15	11.4488	1.46352	3882.95	683150	6.66316	0.338051	0.342112	1.64232	4.84139	3447.58	0.758359	3.33064	0.0237108	0.273828	0.0331468	0.00338365	0.493104	0.0132347	7.82281	3.33058	0.0268396	33.4651	0.00686195	0.0480848	0.422872	9.81819	0.00115599	0.143449	0.000295546	0.00207103	0.422872			0.117641	4.66419	0.0195013	0.233065	0.143194	2.99029	0.0319001	0.338051	0.342112
LM-27B-60	Fakos	epithermal	epithermal IS	spahlerite	anhedral	5991.12	5317.22	53.6224	2.13795	6826.3	669934	0.858243	0.29327	0.336531	2.83416	13.9876	3108.87	4.63354	2.28127	0.0179156	0.084539	0.0168659	0.00901937	0.604473	0.00653111	25.0813	4.68865	0.0108046	159.339	0.0149211	0.0296383	0.260853	23.1401	0.000121798	0.0528541	0.000168202	0.000334106	0.260853			0.147376	7.12464	0.023243	0.1636	0.154534	4.21721	0.0362481	0.29327	0.336531
LM-27B-62	Fakos	epithermal	epithermal IS	spahlerite	anhedral	5306.13	5290.85	59.2895	1.95794	6772.09	686349	1.25092	0.183737	0.557827	3.6102	12.8381	3105.89	7.90316	1.94466	0.0175502	0.02942	0.0166669	0.00806662	0.779529	0.00615814	30.2815	4.63126	0.00789982	106.286	0.0103481	0.0225139	0.216533	16.4691	0.000103866	0.0608911	0.000136055	0.000296009	0.216533			0.152154	7.97284	0.0271145	0.143301	0.13325	5.0167	0.0240845	0.183737	0.557827
LM-27B-63	Fakos	epithermal	epithermal IS	spahlerite	anhedral	3977.05	5796.44	20.1497	2.03672	5668.75	672566	7.69632	0.411438	0.555905	1.57468	5.49766	3079.93	1.44913	20.1197	0.365019	0.176919	0.0303124	0.00951757	3.85656	0.00671839	9.89322	0.408313	0.00174206	36.2467	0.00246789	0.0946488	0.272841	1.42553	0.000333424	0.0781493	0.000472343	0.0181154	0.272841			0.195767	8.49543	0.0272221	0.184786	0.207174	5.52079	0.0243296	0.411438	0.555905
LM-27B-52	Fakos	epithermal	epithermal IS	spahlerite	anhedral	4656.79	4819.4	88.3341	1.76279	2837.34	664388	0.432553	0.536717	0.348721	1.73297	3.31813	2926.96	2.59765	0.191287	0.0903601	0.141115	0.027693	0.00619611	1.08464	0.00413508	50.1103	1.59774	0.00381242	253.309	0.00571262	0.0833091	0.0375634	3.05921	4.68119e-05	0.0196183	7.0144e-05	0.00102294	0.0375634			0.173244	2.63469	0.0218355	0.210091	0.177949	2.54053	0.0419165	0.536717	0.348721
LM-27B-53	Fakos	epithermal	epithermal IS	spahlerite	anhedral	3393.25	9056.15	58.2441	2.28378	8708.65	646590	8.13743	0.482009	0.233912	0.970651	9.20474	3115.35	0.718071	0.828932	0.0244136	0.11964	0.0165486	0.00631211	0.348431	0.00612084	25.5033	2.78578	0.0175669	249	0.0181158	0.0700674	0.158037	26.4177	0.00010509	0.0166652	0.000108373	0.000419161	0.158037			0.1572	5.41165	0.0261738	0.186245	0.114251	5.00508	0.0248808	0.482009	0.233912
LM-27B-54	Fakos	epithermal	epithermal IS	spahlerite	anhedral	3190.98	4642.46	90.1171	1.41572	2542.82	662794	0.985101	0.374395	0.452637	3.00835	1.90967	2969.3	4.3734	4.35658	0.162552	6.26462e-05	0.0129134	0.00541599	1.38053	0.00477508	63.6547	2.17914	0.00345888	199.094	0.00392314	0.117746	0.0211909	1.38329	5.29875e-05	0.0333827	6.00994e-05	0.00180379	0.0211909			0.204556	6.46492	0.0288269	0.167415	0.136414	4.89865	0.0245325	0.25072	0.452637
LM-27B-86	Fakos	epithermal	epithermal IS	spahlerite	anhedral	2941.26	4715.84	88.7142	1.24939	1897.31	664220	1.48411	0.380691	0.347689	5.29657	1.46898	2971.89	13.8497	4.40471	0.138806	0.0912019	0.0131181	0.00633006	1.56876	0.0112412	71.0062	3.37629	0.00716568	255.154	0.00403508	0.0884814	0.0165586	0.936397	0.000126713	0.0597038	7.13534e-05	0.00156464	0.0165586			0.159154	5.49997	0.0198387	0.13437	0.166605	4.7888	0.02138	0.380691	0.347689
LM-27B-88	Fakos	epithermal	epithermal IS	spahlerite	anhedral	2588.07	4615.14	72.7847	2.31544	1600.72	661439	0.525334	0.307599	0.291421	2.99326	2.12971	3017.91	5.50574	0.953327	0.0476202	0.236718	0.0157127	0.00562001	0.523541	0.00665897	31.4345	5.71734	0.0127191	249.758	0.0107346	0.090958	0.0292604	4.0679	9.14886e-05	0.0411249	7.72142e-05	0.000654262	0.0292604			0.210215	6.51714	0.035569	0.243952	0.145962	5.56868	0.023319	0.307599	0.291421
LM-29	Fakos	epithermal	high sulfidation	spahlerite		n.a.	1233.02	0.191475	1.63599	374.781	887034	n.a.	n.a.	31.4545	2.54099	0.95536	2632.05	n.a.	n.a.	9.42509	0.490826	0.0302763	0.502394	11.6564	0.0648119	0.117039	0.217991	0.00556021	0.00608738	0.0431003	0.808579	4.98947	0.0819604	0.338487	13.2706	2.62381	49.2236	4.98947			n.a.	21.9819	0.0317707	0.38866	0.941012	4.64115	n.a.	n.a.	0.294052
LM-29-94	Fakos	epithermal	high sulfidation	spahlerite		80.6838	512.596	0.0390909	0.366139	156.753	692147	68.0585	1.29846	7.87365	1.09435	2.0295	2257.18	0.0192811	0.170162	3.70355	0.123708	0.0204861	2.41496	4.28722	0.00833645	0.106765	0.255258	0.00194449	0.00496478	0.563293	0.863859	51.9176	0.473385	0.213258	27.9949	61.778	94.7421	51.9176			0.167313	7.24486	0.0195833	0.178147	0.183936	2.74121	0.0310256	0.297794	0.341246
LM-29-99	Fakos	epithermal	high sulfidation	spahlerite		375.815	978.304	0.152457	0.892168	291.6	711813	58.1693	3.60988	29.9039	1.45758	5.7462	2542.26	0.0299202	0.683783	10.7458	0.203312	0.0684956	1.13285	16.0622	0.0512185	0.170884	0.0907461	0.00318876	0.00509825	0.0705287	0.669009	37.6906	0.357747	0.335953	9.56059	7.43058	70.4837	37.6906			0.200371	5.34876	0.018434	0.211715	0.0979853	4.60806	0.0248906	0.409861	0.521129
LM-29-97	Fakos	epithermal	high sulfidation	spahlerite		18.3878	280.669	0.0661403	0.24609	97.318	697740	34.7657	0.754525	2.89627	0.719369	0.971344	2727.24	0.0109075	0.957444	4.05554	0.241328	0.0121426	1.82893	6.36441	0.0114366	0.268764	0.11303	0.00179696	0.0228363	0.287368	0.637221	14.6861	0.152621	0.172914	10.8764	27.6522	61.3172	14.6861			0.187389	2.77395	0.0306714	0.185328	0.198847	2.19377	0.0358673	0.384495	0.392332
LM-29-150	Fakos	epithermal	high sulfidation	spahlerite		1991.33	1685.71	0.820436	2.03746	92.6055	718090	48.2095	1.09165	0.772959	1.87811	0.24522	2235.18	1.03573	0.155947	0.428015	0.139286	0.0196529	0.0470168	2.37644	0.012718	0.402675	0.790304	0.0053517	1.06142	0.0197846	0.180108	0.29889	0.103188	0.0155015	2.28916	0.0573071	0.521693	0.29889			0.200983	8.26831	0.0154311	0.111961	0.0945705	4.20517	0.0579908	0.359996	0.604189
LM-29-148	Fakos	epithermal	high sulfidation	spahlerite		194.603	456.19	0.0501864	0.754945	54.0681	740509	23.635	0.317515	0.556061	1.2744	1.47736	2090.89	0.0172508	0.413867	0.0177904	0.175911	0.0155512	1.23516	4.44984	0.0153687	0.0664769	0.286393	0.00345376	0.0902534	0.277574	0.00399799	29.4375	0.332003	0.306232	25.3934	24.6114	0.354486	29.4375			0.183689	10.9673	0.0196772	0.270033	0.192244	4.58271	0.0421909	0.317515	0.556061
LM-29-149	Fakos	epithermal	high sulfidation	spahlerite		1342.35	1104.75	1.15033	0.876813	150.529	696910	170.482	1.46601	0.308946	1.56218	1.21451	2067.93	0.0183331	0.403367	0.0146631	0.103346	0.0175684	1.01615	0.704837	0.00553294	1.31194	2.21636	0.00784995	3.72339	1.44169	0.0208035	1.0558	1.72311	0.00480988	1.35803	0.883362	0.0127469	1.0558			0.120883	8.09408	0.044364	0.221728	0.140062	5.74335	0.0370128	0.391204	0.308946
LM-29-125	Fakos	epithermal	high sulfidation	spahlerite		37.1725	311.113	0.229127	0.211388	115.389	701655	21.1554	0.395237	0.703638	1.27227	0.64108	3580.81	0.103305	2.34396	0.816592	0.101593	0.0147575	0.0329607	0.94867	0.0173926	1.08392	1.34111	0.0183337	0.325633	0.0347442	0.860776	2.79792	0.675767	0.0759081	5.55268	0.143853	3.56392	2.79792			0.160949	5.66097	0.0225027	0.204204	0.128062	3.50646	0.0536082	0.34444	0.532861
LM-29-126	Fakos	epithermal	high sulfidation	spahlerite		23.2018	258.976	0.0434261	0.259195	108.694	716550	52.148	1.27112	3.02967	1.46172	0.669436	2576.73	0.0393226	1.27134	1.55148	0.156245	0.0220257	0.38877	1.77319	0.0101575	0.167542	0.824344	0.00572838	0.0143336	0.219248	0.874963	15.4155	0.377531	0.233903	33.66	8.95244	35.7268	15.4155			0.21416	7.85008	0.038295	0.259195	0.229283	4.8695	0.0398788	0.560626	0.338233
LM-29-127	Fakos	epithermal	high sulfidation	spahlerite		155.692	492.788	0.0331139	0.59405	177	700980	51.9913	1.99751	11.6928	1.51536	1.44211	2237.03	0.0124205	0.271737	3.98109	1.46778e-05	0.0251828	0.840873	12.3168	0.054857	0.0557425	0.123032	0.00445382	0.002832	0.0682702	0.323223	43.55	0.117084	1.65662	45.7622	25.3934	120.224	43.55			0.278591	10.8739	0.0331139	0.184891	0.256303	3.57172	0.0232307	0.375437	0.589239
LM-33b	Fakos	epithermal	epithermal IS	spahlerite		n.a.	1922.41	1.57177	1.17883	34.4594	843502	n.a.	n.a.	0.533425	5.16163	0.181918	4339.31	n.a.	n.a.	0.0625864	0.373385	0.0250809	0.0180776	0.294087	0.0111891	1.33332	17.5514	0.0380471	2.94656	0.0614704	0.212816	0.115741	0.618588	0.00711882	3.28397	0.0115014	0.0398191	0.115741			n.a.	25.8277	0.0619829	0.346395	0.593826	5.20984	n.a.	n.a.	0.533425
LM-33b	Fakos	epithermal	epithermal IS	spahlerite		n.a.	1897.94	0.492176	0.576538	29.3505	857487	n.a.	n.a.	0.499455	2.71521	0.219801	4544.07	n.a.	n.a.	0.156897	0.315525	0.0391475	0.0170323	1.0395	0.0124747	0.853675	2.61205	0.0120007	0.985426	0.0163851	0.150936	0.44659	0.21145	0.0253461	5.51675	0.0346061	0.318783	0.44659			n.a.	32.1966	0.0534103	0.25829	0.718468	5.41982	n.a.	n.a.	0.499455
LM-33b	Fakos	epithermal	epithermal IS	spahlerite		n.a.	5002.87	6.20037	0.785126	2853.97	834856	n.a.	n.a.	168.733	3.71084	234.273	4252.51	n.a.	n.a.	2048.81	0.636012	0.123718	0.0145754	4.67121	0.0633739	7.8973	0.794406	0.0135669	0.0367466	0.00312026	438.605	37.7838	50.1527	0.010221	0.598486	0.00235072	330.434	37.7838			n.a.	19.3487	0.0662971	0.255594	0.751603	4.20504	n.a.	n.a.	0.478195
LM-33a	Fakos	epithermal	epithermal IS	spahlerite		n.a.	7311.02	45.7805	0.852319	1906.16	808593	n.a.	n.a.	0.603138	4.42314	4.05948	4047.65	n.a.	n.a.	0.0795832	0.248094	0.0330684	0.0079694	2.23861	0.013809	53.7129	1.97584	0.00616856	75.9038	0.00355998	0.0355503	0.0886727	1.81339	0.000301635	0.0966162	0.000174079	0.00173836	0.0886727			n.a.	22.8942	0.051529	0.286745	0.714614	4.27603	n.a.	n.a.	0.603138
LM-33a	Fakos	epithermal	epithermal IS	spahlerite		n.a.	7532.71	55.7608	1.10813	3089.57	791527	n.a.	n.a.	0.534308	3.67086	7.47819	4069.59	n.a.	n.a.	3.88583	0.531296	0.0365186	0.0156404	3.25389	0.0112925	50.3198	1.12815	0.00347047	104.361	0.00480668	1.19421	0.134112	2.29823	0.000202517	0.0658322	0.000280491	0.0696875	0.134112			n.a.	17.1323	0.0689229	0.463789	0.728657	6.60562	n.a.	n.a.	0.534308
LM-33a	Fakos	epithermal	epithermal IS	spahlerite		n.a.	1777.25	0.197799	0.531164	59.1056	868630	n.a.	n.a.	5.09815	2.82773	0.265893	4184.15	n.a.	n.a.	1.54435	0.378355	0.025211	0.0192354	0.66925	0.0134051	0.372389	4.22522	0.02003	0.0387983	0.0287418	2.30758	1.34426	0.3973	0.0677712	14.2959	0.0972472	7.80764	1.34426			n.a.	17.543	0.0370237	0.531164	0.670726	3.88756	n.a.	n.a.	0.581886
LM-33a-251	Fakos	epithermal	epithermal IS	spahlerite		4176.22	6509.12	40.1635	1.39742	2790.34	696762	2.91084	0.306002	0.281241	0.886136	8.2343	2880.15	0.237753	2.76296	1.50909	0.113862	0.0429747	0.005733	17.9407	0.0108049	28.7412	0.0493925	0.000602255	142.808	0.000319553	0.0841153	0.20502	0.458973	0.000269022	0.0220632	0.000142742	0.0375736	0.20502			0.193882	6.01778	0.0263474	0.152654	0.161804	2.22157	0.0233068	0.306002	0.281241
LM-33a-254	Fakos	epithermal	epithermal IS	spahlerite		2710.41	6615.57	9.66713	1.09987	3358.01	704159	3.39876	0.34766	0.355589	1.24906	5.23772	2956.14	0.796258	2.40077	0.0898779	0.115852	0.0183037	0.00445314	7.08511	0.0150227	8.78937	0.176294	0.00212032	27.1863	0.000628521	0.0126855	0.541807	0.739258	0.001554	0.129207	0.000460648	0.00929727	0.541807			0.18812	5.47011	0.018519	0.144458	0.0882903	2.26461	0.0364398	0.34766	0.355589
LM-33a-262	Fakos	epithermal	epithermal IS	spahlerite		4721.5	4258.51	10.8477	1.30953	1023.25	712355	4.94421	0.264465	0.303729	3.4665	4.11347	3155.48	3.11987	3.10382	0.239564	0.462575	0.0194249	0.00412803	8.61465	0.0146502	8.28368	0.402396	0.00170062	35.7152	0.000479188	0.0278089	0.379202	0.477497	0.00135053	0.31956	0.000380544	0.0220842	0.379202			0.145126	5.71049	0.0252453	0.111168	0.144088	3.56004	0.0214351	0.264465	0.254441
LM-33a-263	Fakos	epithermal	epithermal IS	spahlerite		4159.75	2768.17	1.51061	1.1485	194.143	711202	13.4702	0.37149	0.35764	1.10266	2.65056	2888.39	7.46795	5.35806	0.321278	0.0716432	0.0257016	0.0134523	1.53144	0.00912461	1.31529	0.720015	0.00595818	4.22383	0.00878405	0.209788	1.75463	1.73076	0.00604035	0.729945	0.00890519	0.212681	1.75463			0.161323	4.78717	0.0186883	0.133884	0.105345	2.2308	0.0259648	0.37149	0.35764
LM-33a-275	Fakos	epithermal	epithermal IS	spahlerite		5731.93	2203.74	5.37334	1.86989	25.8734	720895	8.68346	0.292934	0.396885	2.51795	0.18374	3207.14	1.3426	0.614062	0.0493913	0.0989399	0.017961	0.00800061	2.227	0.00660502	2.87362	1.13064	0.00296588	13.5388	0.00359255	0.0221784	0.0341947	0.0825054	0.00122922	0.4686	0.00148894	0.00919191	0.0341947			0.119509	5.78808	0.0266448	0.0935223	0.0953401	2.6836	0.0397242	0.292934	0.396885
LM-33a306	Fakos	epithermal	epithermal IS	spahlerite		5348.69	1728.62	5.09018	3.13839	26.2738	682683	6.70085	0.244608	0.347958	3.05213	0.209982	3246.4	2.74284	3.29615	0.22695	0.0768296	0.0165027	0.00630811	1.41144	0.00701608	1.62191	2.16242	0.00497087	14.6287	0.00446928	0.160793	0.0412525	0.148772	0.00137836	0.599611	0.00123927	0.0445859	0.0412525			0.127777	5.2993	0.0222772	0.163331	0.148051	2.59532	0.038649	0.244608	0.347958
LM-33a-302	Fakos	epithermal	epithermal IS	spahlerite		2636.6	4622.65	7.94788	0.447107	5822.97	665333	4.86059	0.511543	0.639692	2.31778	9.66971	3188.24	3.60663	4.53339	0.925607	0.376395	0.0403507	0.0156427	18.1855	0.0170069	17.7762	0.127452	0.00093519	12.4245	0.000860175	0.050898	1.21664	0.531726	0.00213981	0.291623	0.00196816	0.11646	1.21664			0.380892	6.12095	0.0286486	0.447107	0.226282	6.02184	0.0443442	0.511543	0.639692
LM-64-75	Fakos	porphyry	overprinting epithermal vein	spahlerite		2724.98	3937.73	3.71167	0.632757	2027.33	642337	6.27421	0.635511	0.807933	7.47833	1.62335	3160.39	549.622	72.0722	0.0308389	0.276092	0.029333	0.0115989	0.30986	0.0139153	5.86587	24.1346	0.0449083	4.59403	0.0374329	0.0995253	0.437364	5.23899	0.00374906	2.01482	0.00312499	0.00830863	0.437364			0.431869	12.9123	0.0386439	0.243256	0.255561	8.44523	0.0484169	0.635511	0.807933
LM-64-76	Fakos	porphyry	overprinting epithermal vein	spahlerite		2305.56	3818.03	4.57492	0.406032	801.263	640221	6.43667	0.552675	0.478719	5.79019	1.46707	3141.17	341.359	138.656	0.210081	0.188615	0.0388849	0.00973889	2.54807	0.331206	11.2674	2.27238	0.129983	9.55658	0.00382206	0.0824472	0.320676	0.575756	0.072396	1.26564	0.00212876	0.0459202	0.320676			0.279126	9.0667	0.0547922	0.406032	0.244583	11.6599	0.0693869	0.552675	0.472451
LM-64-78	Fakos	porphyry	overprinting epithermal vein	spahlerite		4426.85	3190.85	0.753364	1.11959	2735.34	646764	0.753641	0.492955	0.844128	5.24781	7.50211	3106.85	66.6028	0.304576	0.527136	0.59799	0.04907	0.0211371	4.47809	0.970846	0.672893	1.17189	0.216799	0.892475	0.00472012	0.117715	9.95816	1.67529	1.28868	6.96584	0.028057	0.699711	9.95816			0.330715	11.6188	0.0589255	0.323923	0.300641	8.42091	0.0615284	0.492955	0.844128
LM-JB-7D-02	Fakos	epithermal	epithermal IS	chalcopyrite	subhedral	11.8249	333617	0.121311	1.55946	331221	116.902	0.29249	2.26282	0.882123	7.43632	44.2822	0.59501	5.02837	0.330825	0.205344	0.98183	0.407983	0.0599177	12.2117	0.0550511	0.0777905	0.608951	0.00450807	0.137521	0.00490659	0.0168154	365.031	3.62622	0.453802	61.2997	0.493919	1.69271	365.031			1.47619	33.0211	0.121311	1.55946	1.07949	5.4505	0.198791	2.26282	0.882123
LM-JB-7D-07	Fakos	epithermal	epithermal IS	chalcopyrite	subhedral	11.8616	289097	0.237519	1.55956	337939	194.559	0.384419	2.61956	1.87878	25.7294	1.39427	3.02282	62.4491	0.846541	1.54572	0.864172	0.170753	0.0969704	14.0389	0.0787236	0.152299	1.83273	0.00560754	0.126422	0.00690727	0.110103	5.87016	0.0993151	0.331441	108.326	0.408264	6.5078	5.87016			2.20896	59.244	0.237519	1.55956	1.44215	4.98166	0.384419	2.61956	1.87878
LM-JB-7D-18	Fakos	epithermal	epithermal IS	chalcopyrite	subhedral	12.8766	378311	0.241328	1.05953	354352	125.843	2.44864	2.57291	1.09619	70.9051	17.1853	2.63296	63.5886	2.24919	4.03203	1.70318	0.132627	0.0625234	579.923	0.143706	0.22777	0.122267	0.000247803	0.220151	0.000107813	0.0069527	71.2115	0.0296338	0.595482	293.812	0.259081	16.7077	71.2115			1.39905	28.6669	0.241328	1.05953	1.01029	7.02521	0.198742	2.57291	1.09619
LM-JB-7A-02	Fakos	epithermal	epithermal IS	chalcopyrite	subhedral	12.9507	285629	0.184503	1.58443	306006	95.4911	0.240211	2.69604	5.78427	7.45644	18.952	0.939995	0.525864	0.403371	5.08019	0.879752	0.0654845	0.0764307	8.08016	0.0577542	0.116447	0.922808	0.00714766	0.0318973	0.00945905	0.628724	102.719	2.3455	0.313027	40.4138	0.414253	27.5345	102.719			1.14083	31.5823	0.184503	1.58443	1.01728	7.85624	0.170866	1.6112	1.08576
LM--JB-7A-03	Fakos	epithermal	epithermal IS	chalcopyrite	subhedral	12.655	294998	0.263556	1.84367	305190	105.694	0.345892	3.39533	2.95963	9.42682	69.1637	1.22225	0.347594	0.441824	0.991861	0.792036	0.0799701	0.0770848	1.0629	0.0512862	0.142951	8.86896	0.0482512	0.0890502	0.0725231	0.933165	262.426	65.0707	0.194594	35.7679	0.29248	3.76338	262.426			1.21222	51.4851	0.263556	1.84367	1.14511	4.0538	0.345892	3.39533	1.71468
LM-33b_X_66	Fakos	epithermal	epithermal IS	chalcopyrite		n.a.	169528	0.118456	0.779085	212229	159.054	n.a.	n.a.	0.894874	9.79394	29.1764	1.15814	n.a.	n.a.	0.503581	0.867517	0.0495482	0.0216538	1.36391	0.031299	0.152045	7.18079	0.022948	0.132372	0.0158763	0.369219	246.305	21.3918	0.264224	82.6798	0.1828	4.2512	246.305			n.a.	61.7016	0.118456	0.779085	1.08512	8.15555	n.a.	n.a.	0.894874
LM-33b_III_173	Fakos	epithermal	epithermal IS	chalcopyrite		n.a.	219151	0.107114	0.585959	249724	381.264	n.a.	n.a.	0.997379	5.86207	53.7882	3.67724	n.a.	n.a.	0.260484	0.443166	0.0772271	0.0272076	0.433063	0.0185253	0.182801	13.5363	0.0427774	0.107395	0.0628259	0.601492	502.159	124.204	0.17295	54.7274	0.254006	2.43184	502.159			n.a.	41.7563	0.107114	0.585959	1.16447	5.69044	n.a.	n.a.	0.997379
LM-33b_III_174	Fakos	epithermal	epithermal IS	chalcopyrite		n.a.	224132	0.0806921	0.918867	289209	1069.91	n.a.	n.a.	0.602861	6.67998	72.0064	10.3208	n.a.	n.a.	0.184958	0.962722	0.046024	0.0215877	0.61515	0.0212055	0.087817	10.8591	0.0344721	0.133849	0.0350934	0.300672	892.359	117.055	0.262795	82.7835	0.267532	2.29215	892.359			n.a.	21.8774	0.0806921	0.918867	1.47129	7.04455	n.a.	n.a.	0.602861
LM-33b_II_101	Fakos	epithermal	epithermal IS	chalcopyrite		n.a.	192852	0.188679	0.781184	221809	188.343	n.a.	n.a.	0.85402	2.48818	21.9053	4.50072	n.a.	n.a.	0.965943	0.670022	0.0440516	0.0188931	16.9968	0	0.24153	0.146391	0	0.220931	0.00111157	0.056831	116.098	1.28879	0	13.1873	0.100134	5.11949	116.098			n.a.	65.8053	0.188679	0.781184	1.64347	10.5395	n.a.	n.a.	0.85402
LM-33b_IV_149	Fakos	epithermal	epithermal IS	chalcopyrite		n.a.	172814	0.113409	0.607018	205931	404.952	n.a.	n.a.	0.885719	6.96207	135.641	5.58104	n.a.	n.a.	0.417924	1.13209	0.0669849	0.0309259	1.40933	0.037516	0.18683	4.93999	0.0266198	0.128042	0.0219437	0.296541	1196.03	96.245	0.330802	61.3888	0.272692	3.68509	1196.03			n.a.	56.8776	0.113409	0.607018	1.88581	7.5773	n.a.	n.a.	0.885719
LM-33b_IV_148	Fakos	epithermal	epithermal IS	chalcopyrite		n.a.	237447	0.14178	0.707798	262155	190.593	n.a.	n.a.	1.25196	4.07569	109.738	1.61723	n.a.	n.a.	0.153814	1.00329	0.0766588	0.0347103	1.36806	0.0207034	0.200311	2.97917	0.0151334	0.113246	0.0253719	0.112432	774.003	80.2143	0.146025	28.7466	0.244818	1.08488	774.003			n.a.	62.0688	0.14178	0.554038	1.45314	7.04559	n.a.	n.a.	1.25196
LM-33b_XI_158	Fakos	epithermal	epithermal IS	chalcopyrite		n.a.	208236	0.186303	0.704485	269179	1055.24	n.a.	n.a.	0.614019	5.66925	186.625	12.1901	n.a.	n.a.	0.364116	0.883406	0.103187	0.032207	0.421897	0.0234597	0.264453	13.4375	0.0556054	0.303416	0.0763386	0.863044	1001.73	442.347	0.125922	30.4302	0.172874	1.95443	1001.73			n.a.	56.2528	0.186303	0.704485	1.65773	10.5612	n.a.	n.a.	0.614019
LM-33b_XI_161	Fakos	epithermal	epithermal IS	chalcopyrite		n.a.	217685	0.0693272	1.78098	251929	481.809	n.a.	n.a.	1.14393	5.47689	173.663	18.2405	n.a.	n.a.	0.483434	0.604864	0.0529143	0.0311492	0.825255	0.0386835	0.0389265	6.6366	0.0468746	0.0606044	0.0377449	0.585799	2504.98	210.436	0.557985	79.0006	0.449307	6.97323	2504.98			n.a.	39.1899	0.0693272	1.78098	1.75077	8.48175e-05	n.a.	n.a.	1.14393
LM-33a_III_284	Fakos	epithermal	epithermal IS	chalcopyrite		n.a.	172866	0.170726	0.923577	218516	263.188	n.a.	n.a.	2.99773	5.70297	124.373	2.29447	n.a.	n.a.	2.95001	0.978584	0.0796766	0.029727	4.52246	0.0232618	0.184853	1.26103	0.00514361	0.0569516	0.0065732	0.652302	728.494	27.5011	0.136252	33.4043	0.174122	17.2792	728.494			n.a.	41.2222	0.170726	0.923577	1.7794	8.22221	n.a.	n.a.	1.09364
LM-33a_III_285	Fakos	epithermal	epithermal IS	chalcopyrite		n.a.	170900	0.164905	1.51217	201019	69.6768	n.a.	n.a.	2.38021	8.86572	106.222	0.77438	n.a.	n.a.	33.7452	1.29014	0.0705476	0.0718056	12.7365	0.0323136	0.109052	0.696086	0.00253709	0.0692818	0.00563778	2.64948	644.14	8.33994	0.195953	53.7626	0.435437	204.634	644.14			n.a.	91.8195	0.164905	1.51217	2.48535	11.7154	n.a.	n.a.	1.5195
LM-33a_XIII_296	Fakos	epithermal	epithermal IS	chalcopyrite		n.a.	217370	0.127982	0.71021	252866	2207.89	n.a.	n.a.	1.12471	4.15868	84.6241	17.6406	n.a.	n.a.	0.254388	0.67651	0.0555015	0.0335882	0.61307	0.0205765	0.180203	6.78338	0.0335631	0.113791	0.0547869	0.414942	661.218	138.033	0.160777	32.4943	0.262445	1.98769	661.218			n.a.	52.426	0.127982	0.71021	1.50014	8.13001	n.a.	n.a.	1.12471
LM-7D-21	Fakos	epithermal	epithermal IS	galena	anhedral	0.756164	8.57401	0.0812968	0.831134	1.14719	2.00553	0.0920126	0.850082	0.424947	367.43	549.197	47.0764	0.0935521	0.159032	384.347	184.222	0.287132	19.1231	1.52912e+06	211.259	0.0978144	0.000240288	0.000138157	0.191311	1.25059e-05	0.000251351	6755.45	0.000359158	2598.61	4519.61	235.226	4727.7	6755.45			0.329332	8.57401	0.0812968	0.831134	0.274102	2.00553	0.0920126	0.850082	0.424947
LM-7D-22	Fakos	epithermal	epithermal IS	galena	anhedral	3.55861	51.8453	0.0570812	0.681748	2.96192	1.64782	0.0774697	0.796561	0.39383	470.043	468.557	47.729	0.0326922	0.132894	295.167	124.158	0.635121	19.6802	1.49536e+06	263.421	0.0837277	0.000314333	0.000176158	0.144939	1.31608e-05	0.000197388	8208.59	0.000313339	4614.85	8234.63	344.775	5171.01	8208.59			0.378432	11.0159	0.0570812	0.681748	0.307342	1.64782	0.0774697	0.796561	0.343079
LM-7A-25	Fakos	epithermal	epithermal IS	galena	anhedral	10.7645	13.8635	0.0938821	0.698403	0.469168	2.21864	0.0673403	0.76802	0.678954	199.945	328.918	63.5853	0.0265757	0.154397	286.175	82.5381	0.143547	17.9158	1.35527e+06	123.62	0.134424	0.000147532	9.12144e-05	0.138275	1.32194e-05	0.000211157	3503.52	0.000242696	1316.76	2129.75	190.833	3048.24	3503.52			0.348947	13.8635	0.0938821	0.698403	0.469168	2.21864	0.0673403	0.76802	0.678954
LM-7A-26	Fakos	epithermal	epithermal IS	galena	anhedral	11.2532	14.2616	0.158359	0.471411	0.448034	3.06892	0.115186	0.588959	0.599219	512.261	158.347	64.3904	0.0231428	0.230579	150.288	45.3682	0.183654	18.0774	1.30438e+06	76.6865	0.335926	0.000392724	5.87915e-05	0.264276	1.3859e-05	0.000115218	999.921	0.000121396	484.257	3234.81	114.155	949.032	999.921			0.498674	14.2616	0.158359	0.471411	0.448034	3.06892	0.115186	0.588959	0.599219
LM-7A-27	Fakos	epithermal	epithermal IS	galena	anhedral	5.03597	11.4639	0.0545427	0.7872	0.820955	2.03428	0.0554916	1.00396	0.512546	186.702	397.915	45.2159	0.0141948	0.11682	451.823	43.2006	0.393883	17.049	1.34848e+06	19.58	0.069287	0.000138453	1.452e-05	0.106415	1.26431e-05	0.00033506	7295.48	0.000295084	358.984	3423.04	312.58	8283.83	7295.48			0.340314	11.4639	0.0545427	0.7872	0.3512	2.03428	0.0554916	1.00396	0.512546
LM-7A-28	Fakos	epithermal	epithermal IS	galena	anhedral	10.8143	13.0474	0.0557326	0.433352	3.67319	2.38584	0.0880908	0.63846	0.510798	20.4883	340.086	53.7332	0.0115876	0.187012	362.627	62.107	0.229063	18.2856	1.36876e+06	2.87136	0.128608	1.49685e-05	2.09778e-06	0.109109	1.33592e-05	0.00026493	6102.1	0.000248462	51.5203	367.618	328.094	6506.54	6102.1			0.546881	13.0474	0.0557326	0.433352	0.343115	2.38584	0.0880908	0.63846	0.510798
LM-7A-29	Fakos	epithermal	epithermal IS	galena	anhedral	0.788035	9.8968	0.0435639	0.373172	0.394901	1.8088	0.0567763	0.874099	0.497935	492.709	360.69	36.0526	0.0143283	0.195858	300.222	51.286	0.45465	16.7773	1.36887e+06	240.015	0.11674	0.000359938	0.000175338	0.0874892	1.22562e-05	0.00021932	8279.56	0.000263494	5509.5	11310	385.118	6891.52	8279.56			0.461893	9.8968	0.0435639	0.373172	0.394901	1.8088	0.0567763	0.874099	0.497935
LM-7A-30	Fakos	epithermal	epithermal IS	galena	anhedral	0.381017	11.8241	0.0573735	0.606383	0.543522	2.42729	0.0666873	1.05824	0.454953	306.386	400.853	37.6853	0.0233164	0.172637	294.505	81.5528	0.0891599	17.9396	1.37143e+06	241.789	0.094616	0.000223406	0.000176304	0.126108	1.3081e-05	0.000214743	6986.74	0.000292288	4214.3	5340.21	312.682	5133.12	6986.74			0.343083	11.8241	0.0573735	0.606383	0.543522	2.42729	0.0666873	1.05824	0.454953
LM-6A-19	Fakos	epithermal	epithermal IS	galena	subhedral	0.39464	13.0403	0.0834419	0.604865	0.519583	2.90301	0.0540426	1.30765	0.334759	181.709	223.898	30.7133	0.0159469	0.170181	240.295	30.0432	0.0296628	16.8475	1.28025e+06	45.6904	0.137951	0.000141933	3.56888e-05	0.24926	1.31596e-05	0.000187695	2683.28	0.000174887	547.571	2177.67	201.907	2879.79	2683.28			0.39464	13.0403	0.0834419	0.604865	0.519583	2.90301	0.0540426	1.30765	0.334759
LM-6A-20	Fakos	epithermal	epithermal IS	galena	subhedral	0.516963	13.9095	0.0891793	0.604309	0.537285	3.22538	0.126267	1.24236	0.503102	328.415	133.637	41.7581	-0.000318965	0.28886	129.942	7.28508	0.0707514	17.2489	1.34163e+06	122.75	0.147572	0.000244788	9.14935e-05	0.177259	1.28567e-05	9.68537e-05	1498.52	9.96082e-05	1376.44	3682.63	193.418	1457.08	1498.52			0.516963	13.9095	0.0891793	0.604309	0.537285	3.22538	0.126267	1.24236	0.503102
LM27B_III_55	Fakos	epithermal	epithermal IS	galena	anhedral	n.a.	14.3382	0.0560262	0.306373	0.92879	4.55467	n.a.	n.a.	0.613489	313.488	219.512	40.2743	n.a.	n.a.	231.031	48.3526	0.0501787	28.0918	1.29937e+06	137.038	0.182869	0.000241261	0.000105465	0.0913239	2.16195e-05	0.000177802	3918.03	0.000168937	2445.96	5595.38	501.404	4123.63	3918.03			n.a.	14.3382	0.0560262	0.306373	0.92879	4.55467	n.a.	n.a.	0.414833
LM27B_VII_90	Fakos	epithermal	epithermal IS	galena	anhedral	n.a.	13.982	0.0561001	0.209995	18.3819	659.444	n.a.	n.a.	0.165561	280.627	325.804	46.766	n.a.	n.a.	362.611	25.7215	0.0276516	23.2774	1.03304e+06	103.644	0.26715	0.000271651	0.000100329	0.338849	2.25328e-05	0.000351012	5807.55	0.000315383	1847.49	5002.25	414.926	6463.64	5807.55			n.a.	13.982	0.0194066	0.209995	0.478913	3.26579	n.a.	n.a.	0.165561
LM27B_XIII_85	Fakos	epithermal	epithermal IS	galena	anhedral	n.a.	88.5873	0.19936	0.215601	605.046	207.256	n.a.	n.a.	15.3847	284.363	318.21	44.188	n.a.	n.a.	650.871	98.8286	0.184882	23.3402	952734	120.506	0.92467	0.000298471	0.000126484	0.0129583	2.44982e-05	0.000683161	1596.16	0.000333996	604.464	1426.38	117.076	3264.8	1596.16			n.a.	12.0861	0.0345818	0.215601	0.372867	3.48902	n.a.	n.a.	0.345736
LM33b_III_177	Fakos	epithermal	epithermal IS	galena	anhedral	n.a.	38.8495	0.0304288	0.212284	0.380775	2.15021	n.a.	n.a.	0.373451	305.798	588.77	33.5749	n.a.	n.a.	457.41	111.233	0.603311	24.6292	1.01945e+06	94.3363	0.14334	0.000299964	9.25366e-05	0.08148	2.41594e-05	0.000448683	19349.1	0.000577537	3100.23	10049.6	809.406	15032.1	19349.1			n.a.	9.48947	0.0304288	0.212284	0.375709	2.15021	n.a.	n.a.	0.245174
LM33b_VI_127	Fakos	epithermal	epithermal IS	galena	anhedral	n.a.	11.1221	0.0240121	0.181236	0.467409	2.79828	n.a.	n.a.	0.184126	159.358	708.292	43.0029	n.a.	n.a.	854.467	128.195	0.0721012	24.9416	1.01464e+06	17.8323	0.132491	0.000157059	1.75751e-05	0.130411	2.45819e-05	0.000842142	29497.3	0.000698076	742.64	6636.56	1038.71	35584.9	29497.3			n.a.	11.1221	0.0240121	0.181236	0.467409	2.79828	n.a.	n.a.	0.184126
LM33b_II_98	Fakos	epithermal	epithermal IS	galena	anhedral	n.a.	8.76246	0.0306195	0.189381	0.363804	2.2333	n.a.	n.a.	0.216107	374.917	616.61	51.0953	n.a.	n.a.	602.262	100.935	0.255097	25.5262	1.01863e+06	73.6383	0.161682	0.000368059	7.22914e-05	0.141686	2.50593e-05	0.000591246	20137.8	0.000605331	2404.95	12244.4	833.66	19669.3	20137.8			n.a.	8.76246	0.0306195	0.189381	0.288015	2.2333	n.a.	n.a.	0.216107
LM33b_IV_145	Fakos	epithermal	epithermal IS	galena	anhedral	n.a.	7.93896	0.0304905	0.149421	0.29741	3.815	n.a.	n.a.	0.248408	389.169	743.907	55.4467	n.a.	n.a.	814.073	91.2425	0.65997	25.0202	961965	55.2898	0.204058	0.000404556	5.74759e-05	0.122744	2.60095e-05	0.00084626	24398	0.00077332	1813.35	12763.6	820.591	26699.2	24398			n.a.	7.93896	0.0304905	0.149421	0.29741	3.815	n.a.	n.a.	0.248408
LM33a_II_260	Fakos	epithermal	epithermal IS	galena	anhedral	n.a.	7.90378	0.0240577	0.167162	0.387836	2.68518	n.a.	n.a.	0.208133	528.634	348.392	34.867	n.a.	n.a.	413.076	30.9208	0.062262	24.9675	982508	77.3959	0.143919	0.000538045	7.87738e-05	0.115588	2.5412e-05	0.000420431	14481.5	0.000354595	3217.09	21973.5	1037.82	17170.2	14481.5			n.a.	7.90378	0.0240577	0.167162	0.387836	2.68518	n.a.	n.a.	0.208133
LM33a_III_288	Fakos	epithermal	epithermal IS	galena	anhedral	n.a.	24.1371	0.0336013	0.174771	0.443398	2.49931	n.a.	n.a.	0.192275	282.969	307.636	32.473	n.a.	n.a.	368.281	31.3734	0.0903833	24.8704	1.00491e+06	51.1198	0.192259	0.000281587	5.08701e-05	0.174757	2.4749e-05	0.000366482	9155.47	0.000306133	1521.36	8421.37	740.163	10960.3	9155.47			n.a.	12.261	0.0336013	0.174771	0.443398	2.49931	n.a.	n.a.	0.192275
19III-1.d	Kaspakas	epithermal	epithermal IS	pyrite	anhedral	330.613	492077	1.04652	3.90612	13.7377	3.19838	0.0472082	1.60519	552.277	4.43182	0.230024	0.0490979	0.00722819	0.111148	27.3507	24.425	0.0960756	0.0347959	306.665	0.152732	0.267917	0.0144517	0.000498041	0.00189492	0.000113466	0.0891877	0.219799	0.000750083	0.145943	4.23483	0.0332492	26.135	0.219799			0.18092	5.44561	0.0180548	0.122727	0.145145	3.19838	0.0233254	0.267858	0.322301
19III-2.d	Kaspakas	epithermal	epithermal IS	pyrite	subhedral	19.7727	451143	122.639	88.158	6.21055	2.79421	0.585169	1.32623	5447.62	7.44461	0.301306	0.0842334	0.00700499	0.115314	0.723604	16.4522	0.163369	0.0116388	44.6185	7.32225	1.39113	0.16685	0.164108	0.0225125	0.000260851	0.0162176	0.00245685	0.00675295	0.0597055	0.0607032	9.49022e-05	0.00590026	0.00245685			0.177453	7.3171	0.0210893	0.132489	0.0865878	2.79421	0.0245847	0.290106	0.224555
19III-3.d	Kaspakas	epithermal	epithermal IS	pyrite	subhedral	22.0174	528740	0.230828	5.93797	29.6341	3.94725	0.0845295	1.08138	337.015	4.58513	1.50259	0.140076	0.0129979	0.101431	97.1355	26.5574	0.0282058	0.317436	1338.86	0.683914	0.0388732	0.00342467	0.00051082	0.000684919	0.000237095	0.0725512	6.50957	0.00112229	2.96287	19.8639	1.37521	420.814	6.50957			0.200117	6.9286	0.0284221	0.126622	0.22106	3.94725	0.0181355	0.271871	0.311525
19III-6.d	Kaspakas	epithermal	epithermal IS	pyrite	euhedral	22.5981	422358	14.403	7.19299	440.22	503.358	0.0583807	1.63952	74.3319	6.08267	24.3666	8.50722	0.246109	3.4757	18.7728	12.5151	0.193116	0.0440969	635.063	0.572037	2.00237	0.00957805	0.000900756	0.193766	6.94369e-05	0.0295605	1.69177	0.0383688	0.0397165	0.42232	0.00306164	1.30339	1.69177			0.444165	11.5069	0.0237079	0.296955	0.391528	4.26666	0.0583807	0.931121	0.797142
19III-7.d	Kaspakas	epithermal	epithermal IS	pyrite	anhedral	24.137	430491	35.8663	54.1909	4.38458	4.34912	0.792805	1.32813	85.5195	2.57927	0.027654	0.126929	0.00974154	0.222882	4.41504	8.33016	0.0313426	0.030906	143.734	11.4923	0.661851	0.0179447	0.0799555	0.419394	0.000215022	0.0307167	0.00077103	0.000192397	0.320422	0.0719134	0.000861699	0.123097	0.00077103			0.290604	10.3462	0.0549864	0.255641	0.249557	4.34912	0.04814	0.434209	0.557319
19III-11.d	Kaspakas	epithermal	epithermal IS	pyrite	subhedral	19.7838	469178	68.2543	38.6177	10.9782	1.68343	0.0253946	1.25735	8776.09	4.2722	0.689012	0.101134	0.00381233	0.100768	4.24116	40.0599	1.58223	0.032782	280.706	15.9647	1.76744	0.0152195	0.0568733	0.0077773	0.000116784	0.0151089	0.0100948	0.00245457	0.2339	0.0625925	0.000480292	0.0621377	0.0100948			0.131322	4.96785	0.0119987	0.130588	0.0971658	1.68343	0.0123166	0.256504	0.309481
19III-12.d	Kaspakas	epithermal	epithermal IS	pyrite	anhedral	17.7379	468512	96.059	76.0745	18.4428	2.52398	0.114079	0.937553	6649.08	4.16577	0.552945	0.0874056	0.00609177	0.194592	14.6601	56.5548	0.610343	0.0725488	371.903	30.0633	1.2627	0.0112012	0.0808365	0.014447	0.000195075	0.0394192	0.00575631	0.0014868	0.312967	0.0433667	0.000755253	0.152616	0.00575631			0.131792	7.61575	0.016747	0.0431241	0.16509	2.52398	0.0150874	0.328408	0.37182
19III-17.d	Kaspakas	epithermal	epithermal IS	pyrite	euhedral	27.7815	452522	31.5252	37.1906	7.28092	3.11505	0.0689097	1.02173	1286.9	1.12348	0.0845671	0.213722	0.00397342	0.665411	2.15562	3.4188	0.413323	0.0282309	129.72	10.8472	0.847667	0.00866078	0.08362	0.0244971	0.00021763	0.0166175	0.00268252	0.00065192	0.344079	0.0356373	0.000895502	0.0683775	0.00268252			0.13445	3.79605	0.0125114	0.209721	0.142349	3.11505	0.0375496	0.184101	0.262692
19III-18.d	Kaspakas	epithermal	epithermal IS	pyrite	subhedral	19.3319	456183	118.418	49.8397	6.0693	2.15987	0.39903	1.1188	663.553	3.18657	0.254087	0.251239	0.00458967	0.119451	12.5307	16.0233	0.759881	0.0392873	226.884	8.0578	2.37598	0.0140449	0.0355151	0.178461	0.00017316	0.0552295	0.00214568	0.0011199	0.0680453	0.0269094	0.000331767	0.105817	0.00214568			0.165637	6.30618	0.0194191	0.0950024	0.108336	2.15987	0.0308776	0.360728	0.335399
19III-20.d	Kaspakas	epithermal	epithermal IS	pyrite	subhedral	19.7418	506170	89.2544	63.314	4.66419	9.66824	0.0541747	1.34882	10663.1	7.23566	0.0473086	0.857814	0.00659418	0.159149	0.196053	2.62964	0.36736	0.0161853	228.014	1.64665	1.40971	0.0317335	0.00722171	0.00837037	7.09839e-05	0.000859828	0.000530042	0.000207481	0.018449	0.0810679	0.000181339	0.00219656	0.000530042			0.339177	8.66292	0.0299131	0.252119	0.233455	4.38099	0.0541747	0.374436	0.415131
19III-21.d	Kaspakas	epithermal	epithermal IS	pyrite	anhedral	83.1637	486366	6.08966	38.5012	322.302	7189.69	3.68755	1.74251	380.547	1.67267	1.33344	66.2826	0.055197	7.57779	4.01098	1.30096	0.042499	0.763847	15029.1	2.75775	0.158168	0.000111296	0.000183494	0.0160024	5.08246e-05	0.000266881	0.218967	8.87239e-05	0.452858	0.274674	0.125433	0.658653	0.218967			0.393851	10.057	0.0208845	0.207375	0.305705	5.25901	0.0346026	0.628617	0.538581
19III-22.d	Kaspakas	epithermal	epithermal IS	pyrite	euhedral	18.1992	485561	78.343	80.4179	340.327	151.486	0.0882698	0.94665	5125.35	1.83556	4.53282	0.513208	2.75765	1.79927	69.7939	28.3104	7.06874	0.0954083	1551.06	21.8325	0.974199	0.00118342	0.0140759	0.0152854	6.15117e-05	0.0449976	0.0578586	0.0029224	0.278678	0.0234297	0.00121783	0.890876	0.0578586			0.175679	6.78009	0.0180726	0.097671	0.140617	2.3797	0.0282515	0.317651	0.40949
19III-23.d	Kaspakas	epithermal	epithermal IS	pyrite	euhedral	27.8629	434100	271.011	62.3264	8.87343	7.28369	0.368661	0.654165	743.332	2.53935	0.162312	0.253895	0.0115314	0.250318	5.7826	6.87697	0.345936	0.16827	242.766	16.6833	4.34825	0.0104601	0.0687218	0.364589	0.000693136	0.0238196	0.000598916	0.000668596	0.0615597	0.00936994	0.000620898	0.0213372	0.000598916			0.241776	5.36443	0.0264688	0.236664	0.221502	2.81898	0.0324805	0.276397	0.473704
19III-24.d	Kaspakas	epithermal	epithermal IS	pyrite	euhedral	17.3464	454672	37.8235	19.1383	9.62808	4.16346	0.0362904	0.993602	5532.1	1.58924	0.150704	0.326239	0.00701791	0.174978	1.30486	16.1118	0.914557	0.00442014	72.7123	9.10129	1.97633	0.0218565	0.125168	0.00683709	6.07894e-05	0.0179456	0.0039844	0.0020726	0.240625	0.0420172	0.000116862	0.0344988	0.0039844			0.238645	5.15598	0.0290568	0.377518	0.246965	4.16346	0.0362904	0.515008	0.526159
19III-27.d	Kaspakas	epithermal	epithermal IS	pyrite	subhedral	49.3903	460849	44.0714	47.8802	12.6642	4.24226	0.881322	1.6937	9926.26	1.10595	0.139261	0.295207	0.00570647	0.0942264	6.14748	0.22627	0.140116	0.101437	134.867	0.507209	0.92045	0.00820032	0.00376081	0.00443988	0.00075213	0.0455818	0.0031599	0.00103258	0.0115088	0.0250946	0.00230166	0.139489	0.0031599			0.170828	5.2803	0.0208272	0.141308	0.11841	4.24226	0.0278639	0.401695	0.340321
19III-28.d	Kaspakas	epithermal	epithermal IS	pyrite	euhedral	16.7812	398203	14.387	23.6521	6.37479	1.69237	0.0441816	0.720717	589.552	2.3392	2.694	0.207334	0.00568282	0.0662256	5.16507	9.28271	0.24134	0.0371956	59.1374	1.10101	0.608276	0.0395554	0.0186178	0.0244033	0.000628969	0.0873401	0.187252	0.0455548	0.076528	0.162592	0.00258536	0.359009	0.187252			0.177934	5.17885	0.0143128	0.113328	0.11649	1.69237	0.0156157	0.205936	0.264476
19III-29.d	Kaspakas	epithermal	epithermal IS	pyrite	subhedral	16.2215	401153	6.23622	4.54839	6.71796	2.12918	0.0370399	0.625644	5785.8	0.801787	0.276026	0.130619	0.00567551	0.097483	0.842941	11.9849	0.509473	0.0253556	636.426	6.58544	1.37108	0.00125983	0.0103475	0.00107785	3.98406e-05	0.00132449	0.0442618	0.000433713	1.056	0.128569	0.00406586	0.135169	0.0442618			0.103877	4.96646	0.0168308	0.107939	0.130907	2.12918	0.0370399	0.297899	0.372654
19III-30.d	Kaspakas	epithermal	epithermal IS	pyrite	subhedral	18.0943	440937	29.2518	25.1345	5.43373	3.298	0.0469123	1.1957	1244.5	1.02786	0.0884808	0.227072	0.00762441	0.404991	17.7572	15.709	0.537193	0.119913	520.38	17.6849	1.16381	0.00197522	0.0339845	0.0235049	0.000230434	0.0341235	0.0030248	0.000170031	0.604573	0.0351385	0.00409934	0.607046	0.0030248			0.177028	5.03985	0.0240963	0.171758	0.190513	3.298	0.0469123	0.304758	0.345897
19III-4.d	Kaspakas	epithermal	epithermal IS	sphalerite	anhedral	3295.51	5819.56	0.0853899	0.198157	1610.13	770632	91.9172	11.1807	0.451457	1.56237	2.83791	5442.22	5.67511	13.8556	0.183082	0.231361	0.0372818	0.00419604	2.00055	0.0142877	0.430921	0.780968	0.00714189	0.189143	0.00209744	0.0915156	33.2348	1.41856	0.167323	18.2969	0.0491398	2.14407	33.2348			0.180824	6.78268	0.0186716	0.198157	0.150133	2.09365	0.0284102	0.183839	0.423106
19III-5.d	Kaspakas	epithermal	epithermal IS	sphalerite	anhedral	2596.72	6922.69	0.0859626	0.0925909	623.169	792401	138.524	9.18127	0.375034	1.43092	1.52015	5821.95	7.53694	14.1329	0.0288919	0.121216	0.0169584	0.00582851	0.416525	0.010898	0.928413	3.43537	0.0261642	0.229213	0.0139932	0.069364	17.6838	3.64959	0.126776	16.6458	0.0678028	0.336098	17.6838			0.136166	6.97801	0.0331	0.0925909	0.142878	2.61315	0.0240726	0.197388	0.27698
19III-8.d	Kaspakas	epithermal	epithermal IS	sphalerite	anhedral	2577.86	7499.84	0.102709	0.166698	3583.44	765398	7.75337	0.423061	0.182871	1.38202	2.83812	5335.03	3.11184	0.959646	0.0676018	0.171697	0.020242	0.00994917	1.84375	0.00969264	0.616139	0.74957	0.00525703	0.56165	0.00539617	0.0366654	27.6326	1.53932	0.0943696	13.4556	0.0968673	0.658186	27.6326			0.194141	5.3399	0.0131582	0.166698	0.132353	2.45924	0.0275697	0.423061	0.182871
19III-9.d	Kaspakas	epithermal	epithermal IS	sphalerite	anhedral	2414.84	7230.07	0.791906	0.155654	1773.88	758703	18.3314	0.33689	0.362266	1.1428	1.57844	5898.08	8.43076	10.3057	0.133751	0.0986796	0.00823263	0.00769345	1.62987	0.0116633	5.08759	0.701159	0.00715593	2.18598	0.00472027	0.0820619	1.99322	0.968443	0.0147281	1.4431	0.0097151	0.168897	1.99322			0.200024	5.84138	0.0157748	0.155654	0.174902	3.69838	0.0374322	0.33689	0.362266
19III-10.d	Kaspakas	epithermal	epithermal IS	sphalerite	anhedral	2306.84	6597.21	0.740782	0.129899	1073.12	754450	5.3757	0.204455	0.329129	0.929097	1.53304	5322.76	2.56336	0.766704	0.111472	0.00112693	0.0152507	0.00572573	0.625902	0.0127193	5.70275	1.48441	0.0203216	2.25074	0.00914797	0.178099	2.06949	2.44933	0.0171701	1.25421	0.0077293	0.150479	2.06949			0.229228	6.26318	0.0258903	0.129899	0.0766262	2.68251	0.0275416	0.204455	0.329129
19III-13.d	Kaspakas	epithermal	epithermal IS	sphalerite	anhedral	3253.83	7226.68	0.0976199	0.156329	2344.44	765378	4.36157	0.329992	0.548268	0.982596	1.77485	5555.59	2.51983	0.278048	0.0225012	0.15491	0.0164463	0.00728021	0.368445	0.0118901	0.624452	2.66688	0.0322711	0.178051	0.0197593	0.0610707	18.1812	4.81714	0.1218	10.0655	0.0745771	0.230498	18.1812			0.287854	7.1297	0.0230132	0.137936	0.12853	2.37205	0.0233368	0.329992	0.548268
19III-14.d	Kaspakas	epithermal	epithermal IS	sphalerite	anhedral	3476.3	5434.25	0.14892	0.162045	777.5	736418	3.96519	0.34766	0.518073	1.69085	1.51407	5569.61	1.22392	15.4173	0.0399564	0.11531	0.0164935	0.00617323	0.420853	0.0107635	0.919003	4.01767	0.0255756	0.28745	0.0146684	0.0949414	10.167	3.59762	0.0722774	11.3541	0.0414534	0.268308	10.167			0.185994	8.6662	0.0238338	0.162045	0.208794	3.27799	0.017726	0.34766	0.518073
19III-15.d	Kaspakas	epithermal	epithermal IS	sphalerite	anhedral	3919.81	5478.86	0.379932	0.170449	2308.68	743823	18.9513	0.180726	0.263969	0.827769	2.44224	5160.4	3.10872	2.09868	0.0218712	0.0897711	0.0151209	0.00759055	1.79585	0.00787962	2.22901	0.460936	0.00438769	1.4393	0.00422673	0.0121788	6.4281	1.35994	0.0207396	2.17873	0.0199787	0.0575662	6.4281			0.116874	5.3103	0.0270387	0.170449	0.174565	2.8099	0.030279	0.180726	0.263969
19III-16.d	Kaspakas	epithermal	epithermal IS	sphalerite	anhedral	2490.59	5466.12	0.0318433	0.172007	236.417	748333	1.0467	0.356421	0.291272	1.1349	0.40771	5006.23	0.23237	0.113285	0.0248995	0.141966	0.0146635	0.0044657	0.480722	0.00650195	0.185128	2.36083	0.0135254	0.109325	0.00928956	0.0517959	12.8036	0.848119	0.204186	35.6402	0.14024	0.781936	12.8036			0.123483	5.36692	0.0189803	0.172007	0.218091	3.76529	0.0229913	0.291494	0.291272
19III-25.d	Kaspakas	epithermal	epithermal IS	sphalerite	anhedral	2557.67	5797.3	0.0770657	0.237707	693.002	734275	4.94563	0.324291	0.331265	1.00057	0.677925	4851.63	0.987503	0.31206	0.0141698	0.0787659	0.0156678	0.00386233	0.645412	0.0068774	0.324205	1.55027	0.0106558	0.23264	0.00598429	0.0219546	8.79671	1.05038	0.0892407	12.9833	0.0501174	0.183866	8.79671			0.150258	3.24638	0.0182955	0.237707	0.155381	2.62105	0.0228494	0.324291	0.331265
19III-26.d	Kaspakas	epithermal	epithermal IS	sphalerite	anhedral	3388.51	5635.57	0.308124	0.193099	2702.8	725364	5.61379	0.277084	0.446003	1.18991	2.00538	4934.19	2.39953	0.183778	0.52121	0.0945384	0.0225883	0.00453039	2.86748	0.0110353	1.59568	0.414969	0.00384843	0.690857	0.00157992	0.181766	6.50833	0.699351	0.0358144	3.8618	0.0147031	1.69156	6.50833			0.202512	5.83841	0.0306145	0.193099	0.170491	2.79525	0.0211412	0.277084	0.446003
19III-31.d	Kaspakas	epithermal	epithermal IS	sphalerite	anhedral	2809.57	5345.68	0.0313087	0.204921	643.683	705502	3.32267	0.276216	0.479958	1.11123	1.23939	4644.93	0.0455036	3.63096	0.0325604	0.105718	0.0165296	0.00669691	1.02192	0.00432012	0.152784	1.0874	0.00422746	0.0652323	0.00655327	0.031862	39.5862	1.21281	0.137984	35.4928	0.213899	1.03998	39.5862			0.203851	4.54687	0.021255	0.204921	0.155673	2.39528	0.0282288	0.276216	0.479958
19III-32.d	Kaspakas	epithermal	epithermal IS	sphalerite	anhedral	2945.04	5009.85	0.0799528	0.186766	296.002	728968	6.68237	0.269889	0.389937	1.42432	0.92895	5087.48	0.358325	0.226706	0.0828194	0.17439	0.00729513	0.00662884	1.91557	0.0118393	0.428092	0.743546	0.00618056	0.20504	0.0034605	0.0432348	11.6187	0.484946	0.148079	17.8145	0.0829095	1.03585	11.6187			0.19441	6.52661	0.0334466	0.186766	0.14756	4.40378	0.0282393	0.269889	0.389937
19III-33.d	Kaspakas	epithermal	epithermal IS	sphalerite	anhedral	3432.77	4888.56	0.13573	0.186959	2292.03	729467	18.8543	0.57564	0.424698	6.06511	2.50666	5404.94	7.87001	5.58469	0.59364	0.114324	0.0262264	0.00862935	10.2557	0.0284419	0.725987	0.591388	0.00277327	0.319591	0.000841418	0.0578838	18.468	0.244416	0.209548	44.6852	0.0635774	4.37369	18.468			0.0974524	7.20526	0.0354685	0.186959	0.188685	3.01458	0.0151561	0.57564	0.424698
19III-19.d	Kaspakas	epithermal	epithermal IS	galena	anhedral	39.1027	12.4408	0.0667111	0.421777	1.33027	7.45282	0.0524033	1.38678	1.22305	197.312	1169.97	276.358	0.0854779	0.412718	962.441	607.581	0.134224	76.044	4.21376e+06	140.918	0.158167	4.68256e-05	3.34423e-05	0.0545448	1.80466e-05	0.000228405	17537.9	0.000277656	2112.36	2957.7	1139.9	14427	17537.9			0.369273	12.4408	0.0667111	0.421777	0.32782	7.45282	0.0524033	1.38678	0.779219
18A-1.d	Kaspakas	epithermal	epithermal IS	pyrite	subhedral, inclusions	16.2122	419020	40.443	58.9654	7.66413	4.05851	0.0392486	0.818753	643.33	3.75743	0.360841	0.141273	0.00384578	0.0988256	4.81477	7.65236	0.136293	0.015185	95.9651	0.159742	0.685877	0.0391541	0.00166458	0.062865	0.000158234	0.0501721	0.00892222	0.00376013	0.0039498	0.0929068	0.000375466	0.119051	0.00892222			0.155584	3.6716	0.0194649	0.150468	0.133772	1.80867	0.0258226	0.415105	0.332781
18A-3.d	Kaspakas	epithermal	epithermal IS	pyrite	subhedral, inclusions	64.8963	457369	93.2847	20.3498	12.5558	2.51394	1.12134	1.09126	350.978	0.669754	0.127201	0.190733	0.00770391	0.0950015	8.13335	2.66082	0.0240612	0.220991	248.834	0.22091	4.58407	0.00269157	0.000887782	0.265785	0.000888105	0.0326859	0.00136357	0.000511187	0.00236813	0.00717968	0.00236899	0.0871885	0.00136357			0.179351	6.73962	0.0202027	0.170207	0.138192	2.38666	0.0148754	0.180544	0.267328
18A-4.d	Kaspakas	epithermal	epithermal IS	pyrite	subhedral, inclusions	16.7175	400922	25.2708	59.3561	7.32531	1.5212	0.26976	0.900357	883.478	2.98376	0.386287	0.232868	0.00621235	0.293159	13.5172	15.3056	0.116044	0.2439	111.753	2.30145	0.42575	0.0266996	0.0205941	0.0286038	0.00218249	0.120956	0.0152859	0.0034566	0.0910716	0.118071	0.00965145	0.534894	0.0152859			0.214764	6.81906	0.0157441	0.165924	0.114358	1.5212	0.0297186	0.173084	0.376585
18A-5.d	Kaspakas	epithermal	epithermal IS	pyrite	euhedral	18.8573	397562	22.1826	135.366	1.60502	3.03007	0.345193	0.913514	151.868	5.02304	0.0219385	0.215887	0.0087155	0.127806	0.214275	5.43661	0.0184628	0.0112861	4.74951	0.0855476	0.163871	1.05759	0.0180119	0.146065	0.00237627	0.0451151	0.000988995	0.00461911	0.00385651	0.22644	0.000508782	0.00965957	0.000988995			0.19001	7.66976	0.0304985	0.154905	0.171226	3.03007	0.0295535	0.527106	0.248681
18A-8.d	Kaspakas	epithermal	epithermal IS	pyrite	subhedral	17.6541	422950	13.4639	63.7037	0.545205	2.23724	0.0283142	0.711159	213.422	2.56633	0.0164692	0.0808933	0.00672451	0.0867483	0.171249	2.9653	0.00204899	0.00692729	3.50666	0.0519671	0.211352	0.731845	0.0148195	0.063086	0.00197547	0.0488355	0.00122321	0.00469655	0.00385972	0.190608	0.000514507	0.0127191	0.00122321			0.146643	4.07326	0.0142211	0.0467236	0.0841712	2.23724	0.0184291	0.342034	0.241208
18A-9.d	Kaspakas	epithermal	epithermal IS	pyrite	subhedral	31.2505	455153	5.53713	26.7587	54.191	18.0899	0.47435	1.20722	1413.04	2.43811	0.716303	0.779327	0.0172296	0.222209	41.4623	3.02577	0.0142124	0.282971	663.21	0.434435	0.206928	0.00367623	0.000655049	0.00391859	0.000426669	0.0625176	0.129364	0.00108005	0.0784586	0.44032	0.0511043	7.48805	0.129364			0.375744	10.437	0.0364397	0.119725	0.215521	5.73169	0.0472208	0.876463	0.618012
18A-11.d	Kaspakas	epithermal	epithermal IS	pyrite	subhedral	17.764	412292	4.13828	14.069	39.3901	4.01205	1.71905	7.00519	1549.76	4.44253	0.674536	0.157196	0.0084371	0.136735	122.603	6.01019	0.00375466	0.140007	712.226	1.41596	0.294141	0.00623753	0.00198808	0.00267027	0.000196577	0.172141	0.162999	0.000947081	0.342162	1.07352	0.0338323	29.6267	0.162999			0.300139	7.51933	0.0284941	0.2831	0.175348	4.01205	0.0438527	0.35646	0.325139
18A-12.d	Kaspakas	epithermal	epithermal IS	pyrite	subhedral	40.5325	439493	28.7443	154.347	301.62	5.43972	0.686923	0.837624	723.348	1.8804	2.594	0.647525	0.0154993	0.157515	43.3061	4.2911	0.146628	0.345449	281.533	0.49503	0.186232	0.00667916	0.00175834	0.0397379	0.00122703	0.153822	0.0902438	0.00921382	0.0172219	0.0654183	0.012018	1.5066	0.0902438			0.345802	8.66335	0.0328297	0.326178	0.201955	4.62212	0.0505245	0.410708	0.374595
18A-13.d	Kaspakas	epithermal	epithermal IS	pyrite	subhedral, inclusions	60.2055	398646	6.54085	15.112	9.4173	7.91251	3.05276	10.2453	473.05	4.42317	0.238065	0.470559	0.0110842	0.159715	10.4005	5.83121	0.0387679	0.0324933	47.2773	0.142898	0.432826	0.0935581	0.00302255	0.013827	0.000687291	0.21999	0.0363966	0.0050355	0.021847	0.676238	0.00496774	1.59009	0.0363966			0.234895	11.0495	0.0567898	0.322891	0.256481	3.07789	0.0311391	0.325742	0.558187
18A-14.d	Kaspakas	epithermal	epithermal IS	pyrite	subhedral, inclusions	35.4786	438250	2103.76	323.758	148.317	439.001	0.0563179	0.854663	6107.78	2.18507	1.72819	1.77716	0.0522997	0.162305	108.146	28.8053	1.00134	0.129826	2431.64	138.347	6.49795	0.000898603	0.0568945	0.344439	5.33904e-05	0.0444745	0.000821478	0.000710712	0.0657616	0.00103865	6.17113e-05	0.0514059	0.000821478			0.280985	9.93255	0.0428884	0.182326	0.278513	3.17268	0.0563179	0.854663	0.642529
18A-16.d	Kaspakas	epithermal	epithermal IS	pyrite	subhedral, inclusions	23.145	389243	58.1309	2.66678	3.39109	2.02641	0.0945491	0.776746	321.815	0.649144	0.0430639	0.105081	0.00617423	0.0944038	3.72239	1.14434	0.0190582	0.0516483	73.1921	0.046935	21.7982	0.00886905	0.000641257	0.180634	0.000705653	0.0508578	0.00074081	0.000588368	0.000807402	0.011167	0.000888483	0.0640346	0.00074081			0.128291	3.7034	0.0127182	0.131849	0.0841206	2.02641	0.0433114	0.362064	0.227205
18A-18.d	Kaspakas	epithermal	epithermal IS	pyrite	subhedral, inclusions	18.1159	419986	2352.73	57.2643	6.99972	2.40615	0.0407236	0.698606	4834.23	1.1442	0.0833927	0.145726	0.0087552	0.0802359	8.06209	6.41754	0.0527642	0.00906841	63.8998	0.284255	41.0854	0.0179062	0.00444844	0.486681	0.000141916	0.126168	3.54451e-05	0.00130505	0.000120819	0.000486329	3.85443e-06	0.0034267	3.54451e-05			0.149985	4.51862	0.0278514	0.109003	0.117003	2.40615	0.0407236	0.166379	0.213251
lem6-1.d	Kaspakas	epithermal	epithermal IS overprinting sericitic	pyrite	anhedral, inclusions	19.206	381458	42.6303	34.2535	1.01528	3.766	0.0627817	0.568554	76.2029	5.19358	0.031022	0.209637	0.00964346	0.155891	0.0890069	0.671489	0.0350009	0.0158764	5.42002	0.971392	1.24456	0.958222	0.179223	0.559432	0.00292921	0.0164219	0.000727697	0.00572359	0.0227864	0.121828	0.000372419	0.00208788	0.000727697			0.276887	8.69269	0.0509732	0.346875	0.16328	3.766	0.0627817	0.422502	0.273331
LEM6-3.d	Kaspakas	epithermal	epithermal IS overprinting sericitic	pyrite	anhedral, inclusions	18.7053	381805	2.83587	41.3201	0.577212	4.42079	0.0569701	0.637847	5.8132	5.96136	0.0279493	0.240571	0.0124323	0.180777	0.0650475	0.652868	0.0710917	0.00895341	0.304181	0.0618218	0.0686316	19.5981	0.20324	0.487832	0.0294345	0.213845	0.00985565	0.0918839	0.0217999	2.10213	0.0031572	0.0229374	0.00985565			0.389086	9.4385	0.0308195	0.339336	0.281146	4.42079	0.0569701	0.637847	0.443904
LEM6-5.d	Kaspakas	epithermal	epithermal IS overprinting sericitic	pyrite	anhedral, inclusions	17.6148	389002	19.2219	59.139	0.286267	2.85615	0.0535404	0.659985	38.8792	6.7421	0.0230096	0.276757	0.0141529	0.101529	0.0317846	0.984301	0.0277939	0.0125163	1.1309	0.426752	0.325029	5.96174	0.377357	0.4944	0.0110676	0.0281057	0.00119705	0.0203463	0.0222014	0.350752	0.000651147	0.00165356	0.00119705			0.31191	11.2865	0.0332236	0.186502	0.286267	2.85615	0.0535404	0.592009	0.38447
LEM6-6a.d	Kaspakas	epithermal	epithermal IS overprinting sericitic	pyrite	anhedral, inclusions	248.192	419362	162.034	25.8723	17.5887	3.28941	1.36461	0.510429	6.05651	11.8195	0.0738677	0.133305	0.0467736	0.105703	0.0337615	2.91813	0.0347951	0.0978902	31.2489	14.0011	6.26283	0.378239	0.448051	26.7537	0.0031326	0.00108041	0.000455877	0.00236385	0.0864083	0.0729446	0.000604133	0.000208361	0.000455877			0.285561	4.92484	0.0257069	0.147324	0.19221	3.28941	0.0262974	0.510429	0.151271
LEM6-7.d	Kaspakas	epithermal	epithermal IS overprinting sericitic	pyrite	anhedral, inclusions	30.614	402691	19.7195	49.5234	0.73655	3.2892	0.067149	0.992663	10.5571	6.51136	0.0165049	0.125494	0.00497621	0.0826352	0.0507368	0.298656	0.021339	0.0139517	8.07992	5.64091	0.398187	0.805869	0.698139	1.8679	0.00172671	0.00627937	0.000836983	0.00204271	0.286057	0.330198	0.000707505	0.00257292	0.000836983			0.373043	7.24167	0.045549	0.245922	0.201587	3.2892	0.0511032	0.518704	0.351072
LEM6-8.d	Kaspakas	epithermal	epithermal IS overprinting sericitic	pyrite	anhedral, inclusions	47.1547	423782	78.6526	30.9368	6.59313	3.76534	0.506248	3.20957	18.9724	17.0216	0.0188912	0.143641	0.00569686	0.0945902	0.0336818	0.341866	0.0244346	0.0274889	6.73556	4.49007	2.54237	2.52712	0.666622	4.14564	0.00408117	0.00500059	0.000240186	0.0028047	0.0570874	0.216415	0.000349498	0.000428235	0.000240186			0.427073	8.29056	0.0521469	0.281547	0.230707	3.76534	0.0585049	0.593856	0.40191
LEM6-9.d	Kaspakas	epithermal	epithermal IS overprinting sericitic	pyrite	anhedral, inclusions	22.3324	444704	82.1932	59.1775	3.994	11.1637	2.77447	0.755254	69.9428	3.34158	0.278448	0.279906	0.00629591	0.196924	0.0916038	0.635754	0.0347855	0.173951	228.968	1.73276	1.38893	0.0145941	0.00756773	1.17515	0.00075972	0.000400073	0.00338773	0.0012161	0.0210816	0.0406552	0.00211637	0.00111449	0.00338773			0.316896	10.8843	0.0530664	0.36039	0.200368	5.39108	0.0661324	0.755254	0.723853
LEM6-10.d	Kaspakas	epithermal	epithermal IS overprinting sericitic	pyrite	anhedral, inclusions	48.4283	415400	712.165	78.1822	3.52537	3.72622	0.437096	0.570841	182.928	5.05861	0.0302557	0.168853	0.00658703	0.214793	0.0278107	0.953974	0.0316259	0.0151827	11.6898	3.89292	9.10904	0.432737	0.333019	3.89314	0.0012988	0.00237905	4.24842e-05	0.00258822	0.00546632	0.00710314	2.1319e-05	3.90509e-05	4.24842e-05			0.219237	6.01761	0.0337987	0.506552	0.172552	3.72622	0.0431791	0.570841	0.594534
LEM6-11.d	Kaspakas	epithermal	epithermal IS overprinting sericitic	pyrite	anhedral, inclusions	211.546	393683	23.1148	36.4718	3.45401	11.5988	0.938921	0.621048	1.04598	36.4133	0.0376886	0.260397	0.0122877	0.135628	0.0448336	0.348789	0.000727167	0.0452087	29.5376	9.4658	0.633772	1.23278	0.320466	22.0988	0.00153055	0.00151785	0.0016305	0.00127595	0.409512	1.57532	0.00195583	0.0019396	0.0016305			0.326257	12.005	0.0359338	0.260013	0.189046	4.89145	0.0627389	0.479201	0.377439
LEM6-12.d	Kaspakas	epithermal	epithermal IS overprinting sericitic	pyrite	anhedral, inclusions	34.537	458790	137.681	73.9701	2.41829	13.748	0.201603	0.986809	267.517	10.6731	0.15552	0.00257922	0.00586913	0.211473	0.113318	0.980868	0.0555147	0.0422284	284.09	8.19719	1.8613	0.0375695	0.0288542	0.514662	0.000148645	0.000398882	0.00112957	0.000547432	0.0595378	0.077521	0.000306713	0.000823053	0.00112957			0.303688	5.47488	0.0394317	0.27274	0.343544	4.19956	0.0611514	0.687851	0.816562
LEM6-13.d	Kaspakas	epithermal	epithermal IS overprinting sericitic	pyrite	anhedral, inclusions	19.6351	444751	315.096	48.8791	2.32261	3.30151	0.389012	1.11197	299.507	2.18028	0.0205493	0.238788	0.00615677	0.203862	0.305236	4.211	0.0449624	0.0244834	11.9527	6.01706	6.44644	0.18241	0.503407	1.05205	0.00204836	0.0255371	6.5216e-05	0.00171923	0.0190959	0.00691941	7.77012e-05	0.000968707	6.5216e-05			0.331334	10.9556	0.0386425	0.385845	0.283421	3.30151	0.0797998	0.680133	0.578664
LEM6-15.d	Kaspakas	epithermal	epithermal IS overprinting sericitic	pyrite	anhedral, inclusions	22.2563	401108	414.022	9.30606	5.32785	3.04139	0.472079	0.264061	8.56196	12.2755	22.0293	0.0586404	0.00812464	0.103656	0.675552	2.49558	0.0333745	0.137265	2442.74	17.4776	44.4895	0.00502532	0.00715493	48.356	5.6193e-05	0.000276555	0.0532081	0.00901829	0.0422143	0.0296495	0.00033154	0.00163168	0.0532081			0.228089	4.32416	0.0172396	0.201368	0.092191	3.04139	0.0421184	0.244095	0.361778
LEM6-16.d	Kaspakas	epithermal	epithermal IS overprinting sericitic	pyrite	anhedral, inclusions	19.5424	415322	35.3285	32.8129	1.23898	2.37333	0.0334198	0.508118	84.3484	15.2463	11.4879	0.116008	0.00689419	0.0617372	0.238548	2.4707	0.0130499	0.147989	5996.3	30.4749	1.07666	0.00254261	0.00508229	0.41884	2.468e-05	3.97825e-05	0.325174	0.00191583	0.862617	0.431557	0.00418894	0.00675229	0.325174			0.189402	4.47731	0.0233654	0.167336	0.10672	2.37333	0.0334198	0.330019	0.243071
LEM6-17.d	Kaspakas	epithermal	epithermal IS overprinting sericitic	pyrite	anhedral, inclusions	24.6153	444525	232.446	41.1202	12.2617	5.50293	2.11246	0.627145	732.873	2.86948	0.715321	0.268635	0.00803034	0.608072	26.2273	3.65254	0.0253729	0.273727	381.07	6.74405	5.65284	0.00753006	0.0176977	0.317171	0.000718312	0.0688255	0.00307736	0.00187714	0.0290134	0.0123447	0.00117759	0.112832	0.00307736			0.287896	12.9705	0.0597852	0.403845	0.196632	5.50293	0.0625802	0.627145	0.466753
LEM6-18.d	Kaspakas	epithermal	epithermal IS overprinting sericitic	pyrite	anhedral, inclusions	612.93	435406	240.321	36.7878	24.2209	3.18248	0.489766	0.877036	111.748	3.26933	71.494	0.791745	0.00916324	0.199996	0.26873	32.2555	0.274505	0.0367186	602.178	15.9996	6.53262	0.00542917	0.0265696	2.15056	6.09763e-05	0.000446263	0.297494	0.118726	0.0665762	0.013604	0.00015279	0.00111821	0.297494			0.309636	8.29146	0.0377778	0.309471	0.307102	3.18248	0.0530144	0.474906	0.43053
LEM6-19.d	Kaspakas	epithermal	epithermal IS overprinting sericitic	pyrite	anhedral, inclusions	27.5636	429897	87.9673	180.789	7.60061	4.62858	1.081	0.53143	464.684	3.21606	0.0553802	0.0797525	0.00633457	0.286729	2.83142	7.13547	0.125641	0.0166226	85.4268	40.0675	0.486575	0.0376469	0.469027	0.189306	0.000194583	0.0331443	0.000629554	0.000648277	0.455481	0.0365597	0.000188963	0.0321871	0.000629554			0.204994	8.89236	0.0341584	0.269376	0.226436	4.62858	0.0398011	0.460034	0.283835
LEM6-2.d	Kaspakas	epithermal	epithermal IS overprinting sericitic	sphalerite	subhedral	240.56	1897.66	13.0479	0.41402	519.248	693329	6.20656	0.650292	0.476698	7.08825	26.8724	4455.22	43.6222	20.7909	4.11535	6.68203	1.20853	0.0133324	16.3672	11.7003	31.515	0.433076	0.71486	27.3713	0.000814577	0.251438	2.05953	1.64184	0.896721	0.54325	0.00102181	0.315404	2.05953			0.476111	7.85706	0.0379405	0.41402	0.238867	4.98733	0.0519697	0.650292	0.476698
7II-2.d	Kaspakas	porphyry	sericitic	pyrite	anhedral, inclusions	17.1867	366280	22.0145	284.164	0.469623	6.8023	0.0804775	0.803367	179.1	9.91503	0.0339871	0.792308	0.0129965	0.196308	0.07085	10.1003	0.0993451	0.0194091	0.59208	1.80775	0.0774708	16.7461	3.05322	0.122917	0.0327813	0.119663	0.00154386	0.057403	0.0821165	0.450387	0.000881654	0.00321834	0.00154386			0.306161	9.63994	0.0349796	0.372333	0.321869	6.8023	0.0504309	0.515492	0.861196
7II-3.d	Kaspakas	porphyry	sericitic	pyrite	anhedral	30.202	253855	56.5703	582.498	676.931	95.522	10.4796	8.79589	411.175	29.6147	8.86469	7.40086	0.159044	22.7659	2.37419	3874.93	8.53016	0.580216	2553.91	423.532	0.0971167	0.0115958	0.165837	0.137582	0.000227188	0.00092963	0.156702	0.00347103	7.48682	0.523503	0.0102566	0.0419689	0.156702			5.33073	155.681	0.596604	4.61237	4.02676	95.522	0.945917	8.79589	7.84078
7II-4.d	Kaspakas	porphyry	sericitic	pyrite	anhedral	15.9247	337060	14.623	471.573	0.146815	3.25313	0.0266831	0.613711	4.01109	65.0285	0.0122086	0.288458	0.00399772	0.0724499	0.0173322	0.257824	0.0104373	0.0102614	0.464014	0.0734049	0.031009	140.143	0.158195	3.64565	0.0221144	0.0373527	0.000834891	0.0263109	0.00501982	4.447	0.00070173	0.00118527	0.000834891			0.194082	5.39127	0.0352171	0.219499	0.146815	3.25313	0.0266831	0.35194	0.38923
7II-5.d	Kaspakas	porphyry	sericitic	pyrite	anhedral	16.8956	339350	8.64947	1556.59	0.176836	2.17644	0.0340307	0.724317	5.53907	86.3151	0.00683184	0.17484	0.00383381	0.0949082	0.00687929	0.127828	0.0158315	0.00484318	0.769989	0.00842591	0.00555668	112.099	0.0109429	1.56154	0.00628994	0.00893427	0.000789856	0.00887265	0.000974153	9.97923	0.000559939	0.000795342	0.000789856			0.154944	5.34154	0.022544	0.169639	0.136105	2.17644	0.0340307	0.452646	0.346936
7II-6.d	Kaspakas	porphyry	sericitic	pyrite	anhedral	17.9651	361864	100.301	2.31432	0.182072	1.61655	0.0317964	0.793492	2.01106	28.4076	0.0258478	0.315144	0.00913861	0.091885	0.0460518	0.442577	0.0131244	0.00791241	1.34472	0.102717	43.3394	21.1253	0.0763852	49.8749	0.00588407	0.0342464	0.000257702	0.0192217	0.00102408	0.283223	7.88866e-05	0.000459136	0.000257702			0.222327	5.5983	0.0204861	0.144013	0.182072	1.61655	0.0317964	0.42018	0.327486
7II-8.d	Kaspakas	porphyry	sericitic	pyrite	anhedral, inclusions	17.195	364356	83.3732	21.0143	0.586077	3.93614	0.0353946	0.548262	1.75797	60.5757	0.0137731	0.267319	0.00384246	0.0644432	0.019901	2.43185	0.0508844	0.00486245	1.31758	1.39538	3.96745	45.9751	1.05905	47.4258	0.00369045	0.0151043	0.000165198	0.0104533	0.0167366	0.726561	5.83215e-05	0.000238698	0.000165198			0.160645	7.64754	0.0268793	0.178805	0.138321	3.93614	0.0353946	0.268119	0.30311
7II-9.d	Kaspakas	porphyry	sericitic	pyrite	anhedral	17.8935	369844	105.343	325.956	3.00807	2.95281	0.278796	1.1336	35.6856	40.2253	0.241114	0.243511	0.0084518	0.118108	0.771153	34.2857	0.390813	0.0102242	60.5677	10.2074	0.323184	0.664138	0.168529	2.95199	0.000168805	0.0127321	0.00228884	0.0039809	0.0968965	0.381849	9.70555e-05	0.00732037	0.00228884			0.170538	5.9497	0.0112942	0.222819	0.125807	2.95281	0.0234703	0.291796	0.259034
7II-10.d	Kaspakas	porphyry	sericitic	pyrite	anhedral, inclusions	16.5878	352247	128.766	18.1146	0.189963	3.14566	0.02677	0.694559	1.5779	29.2946	0.010463	0.253728	0.00461339	0.0767061	0.0223054	0.0837205	0.0120538	0.00703725	0.0495859	0.00933929	7.10842	590.785	0.188346	81.6062	0.14192	0.449833	8.12553e-05	0.211007	7.25289e-05	0.227502	5.46513e-05	0.000173223	8.12553e-05			0.112585	5.6944	0.022479	0.210639	0.189963	3.14566	0.02677	0.344483	0.228931
7II-11.d	Kaspakas	porphyry	sericitic	pyrite	anhedral, inclusions	49.2419	844876	0.393272	6564.98	1.28794	44.7142	0.276586	7.06864	6.50428	151.8	0.235826	4.33454	0.272226	1.50582	0.307959	1.67796	0.237002	0.0896169	3.85625	1.75049	5.99045e-05	39.3647	0.453936	0.0604636	0.0232394	0.0798598	0.599651	0.0611543	4.45109	385.992	0.227875	0.783069	0.599651			2.7082	94.6628	0.393272	1.23469	1.28794	44.7142	0.276586	7.06864	6.50428
7II-12.d	Kaspakas	porphyry	sericitic	pyrite	anhedral, inclusions	15.4773	304406	364.273	165.987	0.92134	11.3619	0.160474	0.900134	1.49652	30.044	0.118303	0.717742	0.0308288	1.37786	0.0897073	4.79403	0.114638	0.0242661	110.432	4.90485	2.19459	0.272059	0.0444151	243.413	0.000219739	0.000812331	0.000324764	0.00107127	0.0134648	0.0824765	6.66153e-05	0.000246264	0.000324764			0.616464	18.7235	0.0769828	0.405226	0.725852	11.3619	0.160474	0.900134	1.49652
3BII-2.d	Kaspakas	porphyry	sericitic	pyrite	anhedral, inclusions	20.4137	371994	16.175	26.254	12.98	2.42986	0.163521	0.64066	1.54798	21.0561	0.0195596	0.274891	0.00847385	0.129686	0.351812	1.15578	0.0404018	0.0296762	27.535	1.97188	0.616095	0.764701	0.0716135	10.4491	0.00107776	0.0127769	0.00120925	0.000710353	0.121909	1.30177	0.0018347	0.0217504	0.00120925			0.156383	5.32235	0.0204428	0.0927747	0.19833	2.42986	0.0437245	0.478505	0.256084
3BII-3.d	Kaspakas	porphyry	sericitic	pyrite	anhedral	39.6191	354017	16.3391	5.24618	6.12717	2.62811	0.214071	0.691473	400.899	76.8257	1.0159	0.138828	0.00762665	0.323208	0.169079	2.33504	0.0625904	0.0939003	15.3027	4.31469	3.11448	5.02042	0.281957	0.0407562	0.00613621	0.011049	0.062176	0.0663873	0.264071	4.70195	0.00574696	0.0103481	0.062176			0.222145	5.27172	0.0131883	0.181483	0.164354	2.62811	0.0354171	0.364335	0.355709
3BII-4.d	Kaspakas	porphyry	sericitic	pyrite	anhedral	18.3402	380364	153.372	6.43224	1.0091	2.14465	0.143318	0.562136	140.741	191.158	0.00938669	0.130366	0.00967525	0.130578	3.58134	2.27261	0.496252	0.0301569	201.516	0.0726677	23.8442	0.948602	0.000360606	1.08974	0.00014965	0.017772	6.12023e-05	4.65804e-05	0.000473802	1.24637	0.000196626	0.0233508	6.12023e-05			0.165285	7.19591	0.0286501	0.201737	0.189306	2.14465	0.0558758	0.388307	0.332563
3BII-5.d	Kaspakas	porphyry	sericitic	pyrite	anhedral, inclusions	27.791	399395	27.03	16.7722	0.296954	1.93646	0.159503	0.28323	59.3498	149.127	0.0274678	0.211386	0.00873867	0.158555	0.0296924	0.409032	0.0253098	0.0732868	7.33851	0.498246	1.61159	20.3212	0.0678948	0.455435	0.0099866	0.00404611	0.0010162	0.00374297	0.0184331	5.51711	0.00271132	0.0010985	0.0010162			0.154228	6.29128	0.0427233	0.281063	0.126011	1.93646	0.029425	0.207706	0.460914
3BII-6.d	Kaspakas	porphyry	sericitic	pyrite	anhedral, inclusions	52.5812	378647	48.4068	59.212	33.7555	2.28025	0.942764	0.606463	23.6089	35.4606	0.0247054	0.151192	0.00834091	0.507297	0.385778	5.3275	0.0821792	0.22822	35.0596	4.40622	0.817517	1.01144	0.125678	2.05036	0.0065095	0.0110035	0.00051037	0.000704669	0.0910247	0.732553	0.00471463	0.0079695	0.00051037			0.112878	4.03527	0.0244309	0.1702	0.166302	2.20229	0.0284135	0.213393	0.334933
3BII-7.d	Kaspakas	porphyry	sericitic	pyrite	subhedral	17.3289	360338	20.0659	14.0414	22.3208	2.31901	0.488275	0.65614	12.5974	37.9785	0.13757	0.182943	0.0125902	0.36801	33.67	1.05706	0.143018	0.171079	707.37	1.51036	1.42905	0.0536897	0.00213517	1.59285	0.000241852	0.0475988	0.00685594	0.000194482	0.0752699	1.89269	0.00852585	1.67797	0.00685594			0.199337	9.60902	0.0270658	0.179492	0.347543	2.31901	0.0200154	0.397506	0.37292
3BII-8.d	Kaspakas	porphyry	sericitic	pyrite	anhedral	17.3125	365203	36.2096	27.8208	42.8234	2.03214	0.0714218	0.861869	1.93368	17.9164	0.0913642	0.18332	0.0103392	0.0997623	3.81928	0.25204	0.152848	0.165761	72.3295	0.531314	1.30153	0.247706	0.00734575	18.7257	0.00229175	0.052804	0.0025232	0.00126317	0.0146733	0.494798	0.00457782	0.105477	0.0025232			0.115462	4.99074	0.0125503	0.226938	0.247273	2.03214	0.0712466	0.343205	0.327011
3BII-9.d	Kaspakas	porphyry	sericitic	pyrite	anhedral, inclusions	16.7233	361613	14.4297	5.18692	74.8925	2.58053	0.0248877	0.667774	0.310999	58.5105	0.0122296	0.125386	0.00529721	0.099151	0.017663	0.20482	0.013772	0.00291421	0.293803	0.214507	2.78194	199.149	0.730106	46.3979	0.00991891	0.0601187	0.000847529	0.0416251	0.0148657	4.05486	0.000201959	0.00122408	0.000847529			0.161775	7.04376	0.0122868	0.13233	0.142234	2.58053	0.017078	0.352676	0.310999
3BII-1.d	Kaspakas	porphyry	sericitic	chalcopyrite	subhedral	20.0458	396950	0.430738	1.76723	439413	149.19	0.842338	3.30544	4.72911	89.9107	4.2985	13.4505	11.9001	1.04809	0.172889	1.23554	1.05774e-05	0.0847271	9.93119	0.303143	0.243737	9.05337	0.0305243	0.0910822	0.00853141	0.0174087	9.97939	0.432829	0.703776	208.736	0.196702	0.401379	9.97939			1.11705	36.7684	0.321396	1.76723	1.10055	14.0673	0.257008	3.30544	4.72911
lem1a-1.d	Kaspakas	porphyry	sericitic	pyrite	anhedral, inclusions	36.454	380923	36.4275	22.8121	32.67	2.67754	0.156636	0.904246	144.434	125.236	1.87966	0.151227	0.00533312	3.0537	4.27264	28.3869	0.126384	0.127766	277.477	30.2668	1.59685	0.451339	0.109078	0.252209	0.000460457	0.0153982	0.0516001	0.00677411	0.830878	3.43797	0.00350742	0.117292	0.0516001			0.207676	3.98497	0.0132389	0.127049	0.183379	2.67754	0.0497263	0.322633	0.360144
LEM1A-5.d	Kaspakas	porphyry	sericitic	pyrite	anhedral, inclusions	17.8577	383307	155.429	17.1641	0.391831	1.19954	0.0206625	0.528115	4.60528	68.0209	0.00667818	0.0977033	0.00289008	0.0704161	0.0225307	0.441458	0.00755034	0.00367287	3.69717	0.590392	9.05546	18.3981	0.159688	33.7501	0.000993429	0.00609404	4.29663e-05	0.0018063	0.00379848	0.437634	2.36306e-05	0.000144959	4.29663e-05			0.131707	5.07148	0.0160237	0.126427	0.126226	1.19954	0.0206625	0.317267	0.227479
LEM1A-6.d	Kaspakas	porphyry	sericitic	pyrite	anhedral, inclusions	17.3875	378999	68.6121	11.9443	0.50127	1.28182	0.0351666	0.392485	2.82315	94.1196	0.0121941	0.114804	0.00390493	0.25595	0.00830118	0.171668	0.0150923	0.00945306	5.8474	1.01966	5.74432	16.096	0.174378	24.3034	0.00161663	0.00141964	0.000177725	0.00208538	0.0148612	1.37176	0.000137775	0.000120987	0.000177725			0.0979931	3.82134	0.0175588	0.194341	0.116024	1.28182	0.0351666	0.333586	0.18163
LEM1A-7.d	Kaspakas	porphyry	sericitic	pyrite	anhedral, inclusions	17.8544	382908	63.592	3.31911	0.100311	1.44817	0.0352704	0.365886	1.03118	62.2686	0.00669581	0.0889566	0.00907493	0.0568397	0.0233455	0.126769	0.020946	0.00636657	2.16823	0.0871029	19.1594	28.7186	0.0401722	61.6691	0.00293629	0.0107671	0.000105293	0.00308814	0.00136971	0.97919	0.000100116	0.000367114	0.000105293			0.122187	4.48204	0.0190129	0.146361	0.0905612	1.44817	0.0352704	0.275958	0.255399
LEM1A-8.d	Kaspakas	porphyry	sericitic	pyrite	anhedral, inclusions	16.9655	360387	34.1756	0.675824	0.314803	2.13118	0.0300447	0.492758	0.612873	61.1912	0.0081052	0.167014	0.00637733	0.0621631	0.0101006	0.198049	0.012201	0.00438227	6.63064	0.335709	50.5688	9.22856	0.0506299	55.7629	0.000660913	0.00152332	0.000237163	0.00122239	0.00982306	1.7905	0.000128228	0.000295549	0.000237163			0.113739	3.28058	0.0259361	0.170098	0.118823	2.13118	0.0300447	0.173817	0.263787
LEM1A-3.d	Kaspakas	porphyry	sericitic	pyrite	anhedral, inclusions	17.8016	396080	49.3948	0.431889	0.124858	1.06079	0.0269019	0.632047	3.59286	104.814	0.00836224	0.115046	0.00361111	0.0631923	0.0318376	0.733217	0.0144239	0.0075792	2.1524	0.00472845	114.369	48.6964	0.00219683	13.748	0.00352128	0.0147917	0.000169294	0.00388507	9.57279e-05	2.12197	0.000153441	0.000644554	0.000169294			0.13488	3.7645	0.0199618	0.160803	0.124858	1.06079	0.0269019	0.401287	0.26363
LEM1A-4.d	Kaspakas	porphyry	sericitic	pyrite	anhedral, inclusions	191.875	376576	252.785	91.8508	4.67677	50.0292	4.99858	0.631509	7.63019	48.4053	0.0423442	0.20859	0.0158525	0.119355	0.0870019	2.91858	0.0115794	0.0210648	32.0322	6.8294	2.75212	1.51115	0.213204	33.1295	0.000657615	0.00271608	0.000167511	0.00132193	0.0270167	0.191488	8.33312e-05	0.000344174	0.000167511			0.174322	4.6299	0.0359599	0.157374	0.189452	1.9157	0.02438	0.631509	0.297979
LEM8I-1.d	Kaspakas	epithermal	sericitic	pyrite	anhedral, inclusions	35.8221	337860	327.592	375.349	2.90704	47.6309	4.0188	8.03895	76.001	173.346	0.233332	3.94495	0.409625	22.4099	0.340518	23.0298	0.193956	0.24412	126.81	3.608	0.872765	1.36697	0.028452	4.31036	0.00192508	0.00268525	0.000712265	0.00184001	0.0110137	0.529154	0.000745197	0.00103946	0.000712265			3.19354	122.014	0.368509	3.36165	2.25782	47.6309	0.587485	8.03895	6.48746
LEM8I-2.d	Kaspakas	epithermal	sericitic	pyrite	anhedral, inclusions	36.609	377195	21.8636	17.2569	16.522	2.99282	0.269764	0.300994	11.4492	52.0877	3.23145	0.183382	0.00353677	0.0640749	0.0752579	5.71353	0.118994	0.00655682	66.553	4.05638	1.26695	0.78265	0.0609497	1.90962	9.85204e-05	0.0011308	0.147801	0.0485546	0.185531	2.38239	0.000299897	0.00344216	0.147801			0.0938412	5.84805	0.0401267	0.0645754	0.124996	1.08854	0.014651	0.290657	0.241778
LEM8I-3.d	Kaspakas	epithermal	sericitic	pyrite	euhedral, inclusions, dissolution	20.9707	364182	11.1302	5.98599	0.273652	1.81411	0.0228699	0.590611	8.09342	49.8842	0.0312835	0.0862834	0.00551626	0.079743	0.012381	0.83408	0.014315	0.00567572	8.06102	4.21717	1.85938	6.18832	0.523156	1.37522	0.000704094	0.00153591	0.00281068	0.00388083	0.378894	4.48187	0.000509938	0.00111238	0.00281068			0.0757397	5.90014	0.0189218	0.0604086	0.059052	1.78231	0.0228699	0.312179	0.337221
LEM8I-4.d	Kaspakas	epithermal	sericitic	pyrite	euhedral, inclusions, dissolution	23.4906	369506	96.266	179.781	0.414763	1.63325	0.64274	1.01787	5.92934	31.4596	0.010428	0.0726476	0.00397143	0.0507133	0.0175309	0.34805	0.0121191	0.0093369	3.18326	2.35394	0.535463	9.88283	0.739476	16.2355	0.00293313	0.00550721	0.000108324	0.00327588	0.0244525	0.326799	9.69906e-05	0.000182109	0.000108324			0.109077	3.662	0.0220958	0.118795	0.0821464	1.63325	0.030327	0.304205	0.38165
LEM8I-5.d	Kaspakas	epithermal	sericitic	pyrite	anhedral, inclusions	119.578	381518	87.8832	253.551	1.51117	9.27616	1.09306	0.404048	9.93666	31.1478	0.018852	0.135957	0.00463385	0.100216	0.154007	1.77543	0.0230444	0.038702	11.3878	8.56879	0.346609	2.7352	0.752456	8.84434	0.00339856	0.0135239	0.000214512	0.00165546	0.0975021	0.354423	0.00044038	0.00175241	0.000214512			0.149471	2.96201	0.0185979	0.164914	0.143057	1.42286	0.0150834	0.313542	0.258122
LEM8I-6.d	Kaspakas	epithermal	sericitic	pyrite	anhedral, inclusions	51.1963	384312	149.512	122.828	1.00288	3.4242	3.01272	0.844136	4.75908	34.2539	0.0172315	0.0926335	0.00441278	0.105658	0.0510607	0.835949	0.0422727	0.0657222	5.97495	7.86318	1.21725	5.73291	1.31602	31.4161	0.0109996	0.0085458	0.000115252	0.00288396	0.0525923	0.229105	0.000439578	0.000341516	0.000115252			0.0486872	2.82531	0.0117511	0.211701	0.130349	2.02798	0.0400841	0.297542	0.185928
LEM8I-7.d	Kaspakas	epithermal	sericitic	pyrite	anhedral	27.8463	364371	106.075	97.4792	1.39353	1.6547	0.969024	0.652929	5.85816	17.7459	0.0134402	0.155236	0.00267634	0.204917	0.0315275	0.600412	0.0198908	0.0289796	5.72191	2.97011	1.08819	3.10139	0.519077	18.1073	0.00506468	0.00550995	0.000126704	0.00234891	0.028	0.167295	0.000273199	0.000297217	0.000126704			0.127037	3.05358	0.0130014	0.128505	0.106731	1.6547	0.0190204	0.347531	0.276171
LEM8I-9.d	Kaspakas	epithermal	sericitic	pyrite	euhedral	48.1339	349270	28.4334	169.84	1.72498	6.20826	0.348217	0.617339	30.008	20.8914	0.0297953	0.352237	0.0114415	0.541611	0.164195	1.56238	0.0159541	0.0101977	8.09475	4.84912	0.167413	2.58086	0.599044	0.947526	0.0012598	0.0202841	0.0010479	0.00368082	0.170543	0.734751	0.000358654	0.00577473	0.0010479			0.375827	5.1596	0.0255061	0.362465	0.267963	1.98435	0.0406854	0.617339	0.402194
lem35-1.d	Sardes	porphyry	potassic	pyrite	anhedral	65.2826	355220	178.681	64.3265	0.267144	4.6327	0.0404411	0.568055	0.851233	29.6684	0.025122	0.234232	0.00815789	0.100761	0.0151559	0.406217	0.017689	0.00432516	1.48965	1.27884	2.77772	19.9164	0.858488	209.908	0.00290348	0.0101742	0.000140597	0.0168644	0.00715713	0.166041	2.42061e-05	8.4821e-05	0.000140597			0.13006	4.21396	0.024825	0.161076	0.151158	2.9029	0.0404411	0.223729	0.342439
LEM35-3.d	Sardes	porphyry	potassic	pyrite	anhedral, inclusions	20.0812	365670	80.2493	55.1799	1.40382	3.00121	0.412283	1.22863	9.14942	13.1366	0.0852299	0.183522	0.0043422	1.59131	0.21942	0.954803	0.0314831	0.00506024	3.86686	2.0402	1.45432	3.39722	0.527612	8.77098	0.00130862	0.0567437	0.00106206	0.0220411	0.0254233	0.163697	6.30565e-05	0.00273423	0.00106206			0.174134	3.94774	0.0236387	0.0983378	0.191116	3.00121	0.0167433	0.298089	0.277665
LEM35-4.d	Sardes	porphyry	potassic	pyrite	anhedral, inclusions	16.0411	357958	1264.82	4.19112	0.243861	4.01823	0.0508307	0.766093	18.199	12.1127	0.0203267	0.273524	0.00760983	0.137413	0.0490983	1.182	0.0145788	0.012457	0.54859	0.0124348	301.785	22.0796	0.0226668	69.4992	0.0227073	0.0894991	1.60709e-05	0.0370527	9.83128e-06	0.00957662	9.84887e-06	3.88186e-05	1.60709e-05			0.274118	9.88558	0.0309243	0.286172	0.243861	4.01823	0.0508307	0.766093	0.69087
LEM35-5.d	Sardes	porphyry	potassic	pyrite	anhedral, inclusions	16.5295	386282	107.199	85.9452	0.273511	4.43056	0.0317713	0.614614	19.3678	12.8884	0.0372969	0.436449	0.016408	0.103945	0.158384	1.01828	0.0189957	0.0794102	5.5882	3.68515	1.24729	2.30636	0.659452	5.5349	0.0142103	0.0283426	0.000347922	0.00667422	0.0343768	0.120229	0.000740775	0.00147748	0.000347922			0.33605	8.22718	0.0447987	0.181663	0.226551	4.43056	0.0317713	0.614614	0.841573
LEM35-6.d	Sardes	porphyry	potassic	pyrite	anhedral	15.7632	347854	304.813	23.4216	0.265101	1.69481	0.01677	0.7753	20.3523	10.6898	0.0142031	0.223657	0.00843761	0.0822628	0.0128675	0.088065	0.0148286	0.00433206	0.0173864	0.00478761	13.0142	614.836	0.275365	14.9769	0.249163	0.74009	4.65962e-05	0.816909	1.57067e-05	0.03507	1.42122e-05	4.22145e-05	4.65962e-05			0.100824	4.21798	0.0185399	0.188726	0.0854862	1.69481	0.01677	0.340168	0.180388
LEM35-7.d	Sardes	porphyry	potassic	pyrite	anhedral	16.9601	370856	338.235	19.0571	0.127132	1.55445	0.0323824	0.631156	11.4541	15.9333	0.00888387	0.209519	0.00571721	0.0614806	0.0217598	0.143458	0.013361	0.00768397	0.133332	0.000394319	17.7485	119.5	0.00295742	29.5295	0.0576302	0.1632	2.62654e-05	0.0666295	1.16581e-06	0.0471071	2.27178e-05	6.43334e-05	2.62654e-05			0.164713	5.13707	0.015929	0.240069	0.127132	1.55445	0.0323824	0.190704	0.243995
LEM35-8.d	Sardes	porphyry	potassic	pyrite	anhedral	15.9665	347473	1.7849	8.51437	0.110292	2.11901	0.0251373	0.708331	9.10182	14.7743	0.0174946	0.197004	0.00312594	0.124194	0.0147432	0.594837	0.0125138	0.00341813	0.088103	0.00535713	0.209633	167.693	0.0608053	0.196103	0.0387969	0.167341	0.00980145	0.19857	0.00300136	8.27738	0.00191503	0.00825999	0.00980145			0.0853744	2.10831	0.0132987	0.197482	0.0844378	2.11901	0.0251373	0.191115	0.241381
LEM35-9.d	Sardes	porphyry	potassic	pyrite	anhedral	15.6378	338838	0.16132	3.11035	0.105111	1.74782	0.0293793	0.698179	6.02946	14.8425	0.0063229	0.172931	0.0118454	0.0763015	0.0154903	0.417308	0.0127348	0.00818659	0.0252912	0.00366318	0.0518657	586.864	0.14484	0.0267553	0.323694	0.612478	0.0391947	0.250004	0.0227075	92.0062	0.0507475	0.0960219	0.0391947			0.130795	4.26193	0.0138567	0.125373	0.0776285	1.74782	0.0293793	0.149579	0.207209
LEM35-10.d	Sardes	porphyry	potassic	pyrite	anhedral	16.1817	345588	0.674766	1.63847	0.11257	1.84209	0.0256763	0.756343	5.84884	17.3356	0.0101136	0.129562	0.00444427	0.0803775	0.00784528	0.200721	0.0116202	0.00567664	0.178679	0.00272567	0.411826	97.021	0.0152546	0.115367	0.03177	0.043907	0.0149884	0.0566022	0.00403944	25.6914	0.00841275	0.0116267	0.0149884			0.119691	2.62236	0.0224403	0.18878	0.11257	1.84209	0.0256763	0.250948	0.293372
LEM35-11.d	Sardes	porphyry	potassic	pyrite	anhedral	17.7519	358660	993.648	2.19951	0.413002	1.79982	0.0570212	0.660753	22.1573	14.0163	0.0447085	0.222528	0.00527358	0.0846267	0.0171434	2.07219	0.0220061	0.0126684	3.76841	0.582428	451.758	3.71941	0.154555	44.8451	0.00336174	0.00454924	4.49943e-05	0.011864	0.000586151	0.0141059	1.27494e-05	1.7253e-05	4.49943e-05			0.152656	4.94843	0.0203008	0.133604	0.124116	1.79982	0.0570212	0.288412	0.351578
lem65-1.d	Sardes	porphyry	potassic	pyrite	anhedral, inclusions	36.5597	374370	50.7817	16.1158	0.344492	2.91418	0.065867	0.590601	14.0313	15.2243	0.0280941	0.162404	0.00352022	0.104006	0.0227386	1.36269	0.021484	0.00561468	3.20966	0.375476	3.15106	4.74328	0.116983	3.61918	0.00174931	0.00708445	0.000553232	0.00875299	0.00739392	0.299798	0.000110565	0.000447772	0.000553232			0.0892834	4.80805	0.0189834	0.145856	0.136244	2.91418	0.0237769	0.519599	0.319051
LEM65-2.d	Sardes	porphyry	potassic	pyrite	anhedral, inclusions	233.845	518474	32.9245	98.7738	7.11775	9.15233	0.298462	0.991375	5.09729	39.4893	2.44735	0.599278	0.599278	700.663	83.4033	0.656584	0.0265272	0.27024	11168.2	2.98603	0.333333	0.00353587	0.000267369	6.45922	2.41972e-05	0.00746792	0.074332	0.000219135	0.0906933	1.19939	0.00820785	2.53317	0.074332			0.41044	13.2106	0.045717	0.279965	0.407058	3.81871	0.0601227	0.827621	0.783209
LEM65-3.d	Sardes	porphyry	potassic	pyrite	anhedral, inclusions	23.4235	410730	880.001	35.5507	0.135441	1.72475	0.0330534	1.22184	15.2062	38.468	0.0106124	0.127837	1.17748e-05	0.0954992	0.0676286	2.72351	0.0164538	0.00589168	0.200974	0.0327956	24.7534	191.408	0.163184	57.8713	0.0293157	0.336505	1.20595e-05	0.052805	3.72677e-05	0.0437136	6.69508e-06	7.68506e-05	1.20595e-05			0.20144	4.78848	0.0228441	0.245346	0.127953	1.72475	0.0330534	0.216529	0.197006
LEM65-5.d	Sardes	porphyry	potassic	pyrite	anhedral, inclusions	70.072	446520	63.7733	24.7184	94.8961	6.79873	0.173573	0.719323	0.875155	29.4625	0.150714	0.0914128	0.000717255	1.2712	0.0983417	0.17325	0.0364575	0.010802	8.89536	1.94764	2.57999	3.31212	0.21895	72.8709	0.00121434	0.0110554	0.00236328	0.016943	0.03054	0.461987	0.000169381	0.00154205	0.00236328			0.2058	5.08222	0.0230525	0.158455	0.163143	2.83207	0.0354441	0.288831	0.419534
LEM65-6.d	Sardes	porphyry	potassic	pyrite	anhedral, inclusions	31.3353	410606	88.3364	54.8902	0.537365	4.46249	3.86684	29.1821	15.0066	51.2916	0.0334714	0.247373	0.0154302	0.162665	0.337916	0.220783	0.0256107	0.0123589	8.24725	1.10448	1.60933	6.21925	0.133921	5.88651	0.00149855	0.0409732	0.000378909	0.0040585	0.0125031	0.58064	0.000139907	0.00382533	0.000378909			0.316274	10.4297	0.0295518	0.283472	0.206437	4.46249	0.0442223	0.507369	0.683039
LEM65-8.d	Sardes	porphyry	potassic	pyrite	anhedral, inclusions	53.3359	378491	1071.46	20.2104	70.3825	2714.41	0.0578901	0.437934	67.7026	72.5433	0.586653	36.2408	1.01312	0.138208	0.244392	4.81784	0.30974	0.00880243	27.132	3.16851	53.0153	2.67372	0.116781	15.826	0.00032443	0.00900751	0.000547526	0.0216222	0.00295718	0.067705	8.21536e-06	0.000228092	0.000547526			0.218631	7.3416	0.0391647	0.158749	0.206124	3.82081	0.036474	0.36634	0.490528
LEM65-9.d	Sardes	porphyry	potassic	pyrite	anhedral	23.5834	404739	308.478	38.6524	2.4394	2.61529	0.513942	0.974934	7.98477	63.8556	0.783358	0.165082	0.00817493	0.150821	0.0725369	0.49778	0.0164123	0.0728146	4.21839	0.909318	7.98082	15.1374	0.21556	38.6333	0.0172612	0.0171954	0.00253943	0.1857	0.00294776	0.207002	0.000236045	0.000235145	0.00253943			0.177419	3.16055	0.0221298	0.174133	0.0782558	2.61529	0.0329008	0.402708	0.417409
LEM65-10.d	Sardes	porphyry	potassic	pyrite	anhedral	21.4748	417915	625.474	2.95816	0.119267	1.48452	0.0302714	0.644771	17.588	122.886	0.021051	0.0879502	0.00414687	0.0862073	0.0192053	0.879146	1.98519e-05	0.00593168	0.0188087	0.00190869	211.44	6533.48	0.101479	35.5625	0.315369	1.02109	3.36561e-05	1.11922	3.0516e-06	0.196469	9.4835e-06	3.07052e-05	3.36561e-05			0.0945059	4.96479	0.0242359	0.147866	0.119267	1.48452	0.0302714	0.427363	0.306753
LEM40A2-2.d	Sardes	porphyry	potassic	pyrite	anhedral	149.49	439014	2.49112	454.838	15.7731	29.6916	0.373882	0.819656	1.25412	11.9811	0.511515	0.124644	0.00538438	0.105903	0.168542	1.33243	0.90143	0.012055	79.4707	5.60713	0.00547694	0.150761	0.0705559	1.98634	0.000151691	0.00212081	0.205336	0.00643653	2.25085	4.80951	0.00483918	0.0676572	0.205336			0.0758911	4.53977	0.0200458	0.162155	0.107809	2.35959	0.0232921	0.22671	0.39389
LEM40A2-10.d	Sardes	porphyry	potassic	pyrite	subhedral	74.0988	389109	11.1088	18.2584	19.1726	9.15686	0.648649	0.883574	47.6796	1.43047	2.71952	0.304097	0.0221519	0.125882	0.388492	0.191136	0.12157	0.00651783	100.339	1.62273	0.608425	0.0142565	0.0161725	0.23299	6.49584e-05	0.00387182	0.244806	0.0271034	0.146075	0.128769	0.000586725	0.0349714	0.244806			0.322206	10.8803	0.0288194	0.237926	0.434577	4.28752	0.0642195	0.883574	0.449968
LEM40A2-3.d	Sardes	porphyry	potassic	chalcopyrite	anhedral	21.8129	418414	1.06138	1.33542	454930	336.866	0.741409	1.98192	6.0052	123.365	3.00925	4.21633	9.30764	0.812435	0.290454	0.000540641	0.126752	0.0594976	16.8323	0.45616	0.794787	7.32907	0.0271003	0.176743	0.00353473	0.0172558	2.83524	0.178778	0.429782	116.231	0.0560571	0.273658	2.83524			0.873058	32.6208	0.237249	1.33542	0.832997	19.5637	0.45262	1.98192	6.0052
LEM40A2-9.d	Sardes	porphyry	potassic	chalcopyrite	anhedral	21.6906	387031	0.477436	1.54636	502068	163.005	0.617376	3.06306	2.53624	81.934	4.13932	12.4893	10.8958	0.822987	0.141994	4.12893	0.0816741	0.0513988	24.4955	0.131215	0.308749	3.34485	0.0053567	0.188246	0.00209829	0.00579673	8.6699	0.168983	0.274833	171.612	0.107656	0.29741	8.6699			1.294	45.1276	0.154701	1.54636	1.64801	19.4033	0.220196	3.06306	2.53624
lem51-1.d	Sardes	porphyry	potassic	pyrite	anhedral, inclusions	110.172	410940	22.1455	752.828	441.144	34.8439	0.810012	0.847228	133.002	73.8559	0.544162	0.264986	0.228823	1.22593	0.282711	2.84041	0.263202	0.0159556	31.2586	13.7807	0.0294164	2.36274	0.44086	0.166505	0.000510437	0.00904427	0.0245722	0.0174084	0.622279	3.33504	0.000720489	0.0127661	0.0245722			0.184731	4.69485	0.0541597	0.168909	0.122215	2.97822	0.0401411	0.317942	0.349015
LEM51-2.d	Sardes	porphyry	potassic	pyrite	anhedral	24.4358	370381	103.047	5.92617	61.7742	6.3997	0.199792	0.5478	238.171	58.0656	0.591991	1.09716	0.163732	0.305302	0.314701	3.92315	0.567943	0.113907	574.082	6.15933	17.3885	0.101145	0.010729	0.432661	0.000198416	0.000548181	0.00574485	0.0010312	0.0597719	0.563486	0.00110539	0.00305395	0.00574485			0.153163	5.82648	0.0297218	0.245771	0.186289	2.18792	0.0424829	0.5478	0.331554
LEM51-3.d	Sardes	porphyry	potassic	pyrite	anhedral	20.5282	340135	21.1936	2.12538	0.326564	2.13632	0.032712	0.629972	18.207	69.9315	0.031359	0.233922	0.00509664	0.861205	0.0172348	2.12495	0.0119284	0.014458	2.37135	0.433086	9.97164	29.4902	0.182633	1.16403	0.00609696	0.00726792	0.00147965	0.0132241	0.0204348	3.29966	0.000682189	0.000813207	0.00147965			0.165067	4.62772	0.0257521	0.203645	0.106076	2.13632	0.032712	0.283844	0.451444
LEM51-5.d	Sardes	porphyry	potassic	pyrite	anhedral	61.496	343570	106.738	0.851254	0.404631	1.59034	0.043546	0.968616	49.5413	99.5902	0.0198403	0.0888677	0.00616856	0.172329	0.0248092	1.61306	0.0291252	0.00976808	0.784769	0.194382	125.389	126.904	0.247693	2.15451	0.0124471	0.0316134	0.000185879	0.0252816	0.00182112	0.933038	9.15149e-05	0.000232432	0.000185879			0.15859	4.70962	0.0182953	0.198048	0.126336	1.59034	0.0368454	0.402084	0.286493
LEM51-6.d	Sardes	porphyry	potassic	pyrite	anhedral	15.023	336737	21.2421	11.9568	0.128621	1.96393	0.0333685	0.628409	4.88314	26.5215	1.98803e-06	0.0790298	0.0059912	0.0850207	0.0136691	0.190338	0.0180951	0.00514303	0.0262704	0.00341072	1.77658	1009.56	0.129831	4.35009	0.195773	0.520324	9.35893e-08	7.56759e-05	0.000160564	1.24853	0.000242115	0.000643492	9.35893e-08			0.133146	5.53482	0.00826574	0.218557	0.128621	1.96393	0.0333685	0.30151	0.300963
LEM51-8.d	Sardes	porphyry	potassic	pyrite	subhedral	15.2138	327494	11.5892	9.12839	0.234576	1.8706	0.0317891	0.714644	2.59573	19.6853	0.00333871	0.115576	0.00570593	0.0809845	0.0130213	0.181303	0.0172332	0.00489827	0.0376501	0.00324859	1.26957	522.848	0.0862838	4.4647	0.1301	0.345851	0.000288088	0.0886773	0.000280312	1.69859	0.000422659	0.00112357	0.000288088			0.126812	5.27252	0.00787304	0.208172	0.122528	1.8706	0.0317891	0.287284	0.286738
LEM51-9.d	Sardes	porphyry	potassic	pyrite	subhedral	40.4534	363310	149.143	99.4358	24.043	5.43807	0.0884055	0.326322	18.5336	130.327	0.0303192	0.114831	0.0245558	0.0911165	0.0185115	2.13753	0.00926772	0.00737287	3.98965	0.405894	1.49989	32.6663	0.101737	8.04719	0.001848	0.00463989	0.000203289	0.00759946	0.00272151	0.873839	4.94349e-05	0.000124119	0.000203289			0.175382	5.15301	0.0168352	0.192921	0.100186	1.23043	0.0140644	0.307373	0.218
LEM 89-1.d	Fakos	epithermal	epithermal IS	pyrite	euhedral	338.672	576576	151.458	241.876	19.7848	122.034	0.432705	1.50425	837.56	6.9786	6.68751	3.19411	0.0181294	0.158879	12.4844	23.9091	4.41313	0.151816	868.382	0.0118753	0.626182	0.00803632	1.36752e-05	0.180833	0.000174826	0.0143767	0.0441542	0.00770112	7.84065e-05	0.0460761	0.00100236	0.0824284	0.0441542			0.447955	15.0734	0.0221477	0.208792	0.242341	3.68337	0.0781453	0.671208	0.659591
LEM 89-2.d	Fakos	epithermal	epithermal IS	pyrite	anhedral	22.5926	445881	490.236	1.06267	0.560367	3.18306	0.028951	0.907996	98.4178	46.75	0.0132869	0.104811	0.0057466	0.119264	0.0184233	7.81767	0.0150887	0.00556044	1.4799	0.993717	461.326	31.59	0.671478	4.98117	0.00375732	0.0124491	2.71031e-05	0.00897827	0.00202702	0.0953622	1.13424e-05	3.75806e-05	2.71031e-05			0.139548	6.11628	0.014256	0.164699	0.0830891	3.18306	0.028951	0.24931	0.269825
LEM 89-3.d	Fakos	epithermal	epithermal IS	pyrite	subhedral	19.1374	393300	5258.16	74.409	0.490176	2.7113	0.0423226	0.789518	259.627	38.8258	0.0479094	0.143919	0.00867511	0.130106	0.0417118	3.58756	0.038154	0.0082174	9.28368	1.80666	70.6657	4.18215	0.194606	20.2527	0.000885145	0.00449302	9.11144e-06	0.00516061	0.000343591	0.00738391	1.56279e-06	7.93277e-06	9.11144e-06			0.287618	7.97534	0.017095	0.215184	0.142498	2.7113	0.0423226	0.312801	0.456036
LEM 89-4.d	Fakos	epithermal	epithermal IS	pyrite	subhedral	80.7886	470972	29.4996	480.681	156.838	21.6804	0.198525	0.600208	130.666	32.8679	3.45313	0.235568	0.00876343	0.158407	1.15379	7.91091	0.553999	0.0176448	19.1027	1.49291	0.0613705	1.72059	0.0781516	0.225763	0.00092368	0.0603992	0.117057	0.180767	0.0506076	1.11418	0.000598135	0.0391119	0.117057			0.144327	6.7026	0.0382611	0.176825	0.124091	3.174	0.0328856	0.479103	0.320074
LEM 89-6.d	Fakos	epithermal	epithermal IS	pyrite	euhedral	22.4652	467452	142.868	101.688	3.00304	3.09826	0.391701	0.95832	111.554	26.9799	2.85058	0.0581091	0.0034003	0.130754	0.786295	2.5215	0.32476	0.00841323	5.37152	0.915835	1.40497	5.02276	0.170498	1.28072	0.00156627	0.146382	0.0199525	0.530683	0.00641034	0.188844	5.8888e-05	0.00550364	0.0199525			0.15318	9.16634	0.0296651	0.203455	0.177566	3.09826	0.0260341	0.158766	0.268407
LEM 89-7.d	Fakos	epithermal	epithermal IS	pyrite	anhedral	52.5471	437952	41.33	237.215	20.6568	75.6579	0.224132	0.612982	142.032	31.1012	0.342491	2.20404	0.00421094	0.115124	0.789172	0.711934	0.156578	0.0255897	319.889	1.32744	0.17423	0.0972251	0.00414968	0.290991	7.99956e-05	0.00246702	0.00828676	0.00107066	0.032118	0.75251	0.000619156	0.0190944	0.00828676			0.15531	7.68899	0.0187322	0.222463	0.187079	2.21266	0.0274064	0.49352	0.244328
LEM 89-10.d	Fakos	epithermal	epithermal IS	pyrite	subhedral	134.866	434296	1282.05	192.001	39.5163	7.31109	0.506622	0.57253	207.109	28.105	0.228107	0.266002	0.00386994	0.104025	2.50462	6.6042	0.194059	0.0709172	143.815	2.98601	6.67731	0.195425	0.0207629	6.19024	0.000493115	0.0174156	0.000177923	0.00158612	0.00232909	0.0219218	5.53153e-05	0.0019536	0.000177923			0.20987	5.33924	0.0153251	0.196477	0.22167	1.58215	0.0271285	0.57253	0.316243
LEM 89-11.d	Fakos	epithermal	epithermal IS	pyrite	subhedral	287.182	444257	45.122	97.4642	220.906	11.178	5.71153	0.805579	84.2841	8.48875	19.5592	0.157432	0.0146945	0.125182	8.65988	33.6603	1.42341	0.22564	92.3772	0.819714	0.46296	0.0918922	0.00887355	0.535356	0.00244259	0.0937448	0.433475	0.211732	0.0181666	0.188129	0.00500066	0.191922	0.433475			0.250996	6.38558	0.0183288	0.23499	0.264926	1.89193	0.0324447	0.684782	0.378193
LEM 89-12.d	Fakos	epithermal	epithermal IS	pyrite	anhedral, cracked	20.8588	437863	2.3349	140.259	0.287186	2.65499	0.0268482	0.372064	5.58291	45.8186	0.0147324	0.092724	7.8188e-05	0.0877679	0.0183331	0.609772	0.0109752	0.0060024	3.0567	1.46372	0.016647	14.9895	0.478855	0.418223	0.00196368	0.00599766	0.00630966	0.00481971	0.626887	19.6234	0.00257073	0.00785176	0.00630966			0.133942	5.63015	0.0156759	0.174528	0.163258	2.65499	0.0268482	0.372064	0.201356
LEM 89-13.d	Fakos	epithermal	epithermal IS	pyrite	anhedral, cracked	39.1367	431788	5.82426	48.8083	0.17226	3.84628	0.0471212	0.364511	3.33082	44.2806	0.0153082	0.0978373	0.00529124	0.11264	0.0249066	1.13402	0.0164762	0.00342405	1.65154	0.651596	0.119329	26.8117	0.394539	1.7486	0.00207325	0.0150808	0.00262835	0.00926906	0.111876	7.60279	0.000587896	0.00427635	0.00262835			0.196974	6.86148	0.0183789	0.135853	0.17226	3.84628	0.0471212	0.36012	0.215672
LEM 89-18.d	Fakos	epithermal	epithermal IS	pyrite	anhedral	49.4048	387123	18.0586	802.335	6.82759	3.32633	0.0679226	0.694258	10.4755	40.2182	0.0394341	0.206415	0.00382661	0.101799	0.0494983	1.82953	0.0202912	0.00842473	3.29051	2.8812	0.0225076	12.2225	0.875609	1.72389	0.00256031	0.0150427	0.00218367	0.0119842	0.159547	2.22709	0.000466521	0.00274098	0.00218367			0.114611	7.43612	0.0205945	0.175368	0.133032	3.32633	0.0679226	0.352948	0.311166
LEM 89-19.d	Fakos	epithermal	epithermal IS	pyrite	anhedral	4373.09	388249	8.62171	38.5606	2.15915	3.17837	0.0747011	0.920226	321.618	2.32739	0.523299	0.0942928	0.00591537	0.104424	1.09461	1.35352	0.137584	0.0116788	14.0946	0.00690296	0.223589	0.165127	0.000489759	0.0268073	0.000828602	0.0776619	0.0606955	0.0371277	0.000800648	0.269945	0.00135458	0.12696	0.0606955			0.230227	7.27802	0.0146624	0.265433	0.211047	3.17837	0.0438405	0.278157	0.293201
LEM 89-20.d	Fakos	epithermal	epithermal IS	pyrite	anhedral	20.5458	402571	1.80065	347.381	1.70766	4.76181	0.0533498	0.758686	11.8577	47.5442	0.0367745	0.384294	0.00691735	0.134075	0.157584	0.602995	0.0137574	0.00963107	1.44559	0.716066	0.00518349	32.8891	0.495345	0.151854	0.00666238	0.10901	0.0204229	0.025439	0.397672	26.4039	0.00534867	0.0875153	0.0204229			0.295525	11.8551	0.0765776	0.352389	0.35304	4.76181	0.0533498	0.723579	0.598085
LEM 89-22.d	Fakos	epithermal	epithermal IS	pyrite	anhedral	18.6164	396286	360.053	1.37295	0.162559	2.86806	0.0295065	0.494467	40.5708	47.8391	0.0190731	0.0941525	0.00462402	0.0795077	0.02616	0.525702	0.0163325	0.00828242	0.788945	1.2673	262.248	60.6369	1.60633	8.87467	0.0104981	0.0331583	5.29731e-05	0.0241755	0.00351977	0.132867	2.30034e-05	7.26561e-05	5.29731e-05			0.250537	6.15741	0.0302608	0.227436	0.162559	2.86806	0.0295065	0.442275	0.29165
LEM 89-23.d	Fakos	epithermal	epithermal IS	pyrite	anhedral	17.6342	368120	2112.67	5.20055	0.154632	2.72971	0.0280871	0.595759	45.0168	45.9157	0.0181473	0.0895848	0.00440144	0.0756605	0.0248985	2.66596	0.000454918	0.00788321	0.731956	0.741207	406.241	62.7301	1.01264	46.9308	0.0107701	0.0340164	8.58972e-06	0.0247929	0.000350838	0.0217334	3.73139e-06	1.17853e-05	8.58972e-06			0.238485	5.86126	0.028806	0.216505	0.154632	2.72971	0.0280871	0.421035	0.277604
LEM 89-14.d	Fakos	epithermal	epithermal IS	galena	anhedral	0.747711	13.6588	0.0309268	0.329492	0.517918	5.44925	0.119165	1.05261	1.03012	1072.94	744.496	91.4854	0.0178762	0.326158	797.033	104.326	1.00608	76.5283	3.7917e+06	205.635	0.0938622	0.000282972	5.42329e-05	0.0300226	2.01831e-05	0.000210205	24072.8	0.000196349	6649.08	34693	2474.49	25771.6	24072.8			0.747711	13.6588	0.0309268	0.329492	0.369671	5.44925	0.119165	1.05261	1.03012
LEM 89-15.d	Fakos	epithermal	epithermal IS	galena	anhedral	0.631353	17.7298	0.0476115	0.545711	0.74839	7.30842	0.109946	1.37384	0.71935	1194.81	731.282	104.163	0.0151977	0.252703	701.122	142.581	1.25224	82.5683	3.85848e+06	303.484	0.0872468	0.000309659	7.86537e-05	0.0661868	2.13992e-05	0.000181709	15359.3	0.000189526	6374.17	25095	1734.21	14725.9	15359.3			0.631353	17.7298	0.0476115	0.545711	0.400785	7.30842	0.109946	1.37384	0.71935
LEM 89-8.d	Fakos	epithermal	epithermal IS	galena	anhedral	1.83966	79.9713	0.173227	1.9188	0.786823	21.5743	0.337303	3.40043	3.18256	2208.7	1533.22	118.317	0.0861113	1.19511	929.258	223.38	0.168528	119.912	5.92743e+06	1634.62	0.0902792	0.000372624	0.000275772	0.0544302	2.02301e-05	0.000156773	8850.93	0.000258666	9436.26	12750.3	692.225	5364.39	8850.93			1.83966	79.9713	0.173227	1.9188	0.616509	21.5743	0.337303	3.40043	3.18256
LEM 89-9.d	Fakos	epithermal	epithermal IS	galena	anhedral	1.4531	50.8813	0.156782	0.932687	1.16451	18.435	0.324897	2.23749	2.35703	1991.97	1615.59	143.945	0.0407027	0.547879	1533.78	115.637	0.304482	121.54	5.58596e+06	939.882	0.168097	0.000356602	0.000168258	0.0665166	2.1758e-05	0.000274577	10304.7	0.000289224	5994.85	12705.4	775.216	9782.89	10304.7			1.23467	50.8813	0.156782	0.729343	1.16451	18.435	0.324897	2.23749	2.35703
LEM 89-16.d	Fakos	epithermal	epithermal IS	sphalerite	subhedral, inclusions	5316.99	5492.43	45.8479	0.292222	914.572	740606	0.611709	0.73569	0.423558	3.26598	5.20767	3337.11	4.42371	0.971075	0.5514	0.129392	0.0170341	0.00760507	13.7768	0.0116329	156.894	0.237063	0.000844384	108.245	0.000552018	0.0400237	0.113586	0.378002	0.000253729	0.0712351	0.000165876	0.0120267	0.113586			0.338075	9.49395	0.0254953	0.292222	0.214542	3.91324	0.0588734	0.73569	0.385186
LEM 89-17.d	Fakos	epithermal	epithermal IS	sphalerite	subhedral, inclusions	4303.74	5303.48	62.3281	0.200902	2037.58	683925	1.20015	0.404322	0.95523	4.79948	5.21534	3321.97	2.40401	0.703779	0.202117	0.189675	0.0131935	0.0100564	5.41384	0.008685	310.241	0.88652	0.00160422	65.2493	0.00185754	0.0373334	0.0836757	0.963335	0.000139343	0.0770035	0.000161346	0.00324279	0.0836757			0.131304	8.51914	0.0235935	0.200902	0.152512	3.81135	0.0778157	0.404322	0.356508
33I-1.d	Sardes	epithermal	epithermal IS	pyrite	anhedral, inclusions	17.65	390673	53.3736	901.353	0.169834	1.17728	0.0224502	0.620718	261.94	11.4826	0.00797746	0.191149	0.00329302	0.0905022	0.0239204	0.192317	0.0105052	0.0104228	0.132584	0.00557277	0.0592149	86.6064	0.0420321	0.203763	0.0786128	0.180417	0.000149465	0.0601692	0.000104411	0.215136	0.00019528	0.000448169	0.000149465			0.16544	4.96721	0.026728	0.127144	0.131491	1.17728	0.0224502	0.355281	0.34144
33I-2.d	Sardes	epithermal	epithermal IS	pyrite	anhedral, inclusions	18.5333	376741	148.327	892.786	0.27896	3.87004	0.0624128	0.856838	68.9337	23.6843	0.0144587	0.203669	0.0081164	0.301385	0.0605804	0.379238	0.0303621	0.0171426	0.322031	0.101298	0.166139	73.5465	0.314561	2.15173	0.0532327	0.18812	9.74789e-05	0.0448986	0.00068294	0.159676	0.000115573	0.000408425	9.74789e-05			0.16155	9.96124	0.0371708	0.253945	0.27896	3.87004	0.0624128	0.782696	0.543549
33I-12.d	Sardes	epithermal	epithermal IS	pyrite	anhedral, cracked	17.5198	378410	74.0583	1694.73	3.10876	4.41685	0.063408	0.879819	119.647	27.278	0.526455	0.171364	0.012195	0.174044	4.86382	1.70221	0.0473368	0.0460438	8.74079	0.543916	0.0436993	3.12077	0.0622273	0.618974	0.0052677	0.55645	0.00710866	0.0602297	0.00734443	0.368332	0.000621724	0.0656755	0.00710866			0.389026	10.8292	0.029785	0.338623	0.229457	4.41685	0.063408	0.879819	1.61388
33I-13.d	Sardes	epithermal	epithermal IS	pyrite	anhedral, inclusions	22.0328	416121	1.05475	25.6124	127.778	3.75475	0.100561	0.959053	4376.64	6.76328	15.8032	0.173482	0.0121108	0.154166	227.212	4.35011	9.77298	7.15314	102.783	1.3123	0.0411812	0.0658018	0.0127678	0.000240995	0.0695949	2.21061	14.9829	0.153754	1.24419	6.41222	6.78184	215.418	14.9829			0.318818	10.0441	0.0526442	0.434248	0.351621	3.75475	0.100561	0.727934	2.23129
33I-15.d	Sardes	epithermal	epithermal IS	pyrite	anhedral, inclusions	24.0768	423914	344.761	1519.56	5.68127	3.00411	0.12503	0.82973	939.732	14.2195	0.0574795	0.198528	0.0102713	0.208138	17.6023	4.89108	0.269826	0.0452597	21.206	1.33977	0.226883	0.670539	0.063179	0.366872	0.00213429	0.830062	0.000166723	0.00271053	0.00388609	0.0412444	0.000131279	0.0510565	0.000166723			0.539533	11.7315	0.0626952	0.241626	0.326381	3.00411	0.0373046	0.82973	2.22981
33I-17.d	Sardes	epithermal	epithermal IS	pyrite	anhedral	18.1429	381976	92.111	3983.33	6.58011	4.40409	0.0522706	0.872246	305.981	109.284	0.0225769	0.124091	0.016717	0.183917	0.0346885	1.21539	0.0446231	0.010582	2.51479	0.159754	0.0231241	43.4564	0.0635256	0.301035	0.00420792	0.0137938	0.000245105	0.00897764	0.00173436	1.18643	0.000114884	0.000376594	0.000245105			0.286853	9.57087	0.0654593	0.343252	0.203361	4.40409	0.0522706	0.872246	1.61791
33I-3.d	Sardes	epithermal	epithermal IS	marcasite	aggregate of euhedral grains	17.9775	392757	10.3536	106.083	133.894	4.2759	0.0443651	1.06182	42234.1	11.6717	20.3439	0.343833	0.0151761	0.811967	657.952	7.61601	9.97517	8.80945	178.084	0.598511	0.0975989	0.0655404	0.00336084	0.000245148	0.0494681	3.69463	1.96491	0.114238	0.0578069	1.1273	0.850857	63.548	1.96491			0.285948	17.4416	0.0644661	0.259038	0.392762	4.2759	0.0286233	0.802348	0.799872
33I-4.d	Sardes	epithermal	epithermal IS	marcasite	aggregate of euhedral grains	19.4651	404329	13.7397	54.4442	202.914	6.38438	0.0654918	1.09815	48806.9	10.2752	27.7213	0.149046	0.016536	0.440314	1228.98	7.63872	4.5932	10.9734	142.331	0.405934	0.252363	0.0721923	0.00285204	0.000281512	0.077098	8.63463	2.01761	0.194766	0.0295446	0.747849	0.798667	89.4471	2.01761			0.453297	10.1301	0.0742056	0.34105	0.321984	6.38438	0.0654918	0.566345	0.563105
33I-5.d	Sardes	epithermal	epithermal IS	marcasite	aggregate of euhedral grains	22.0613	451057	16.6171	121.173	254.13	7.05039	0.744273	1.02377	60400.8	20.0341	50.0308	0.319398	0.0199585	0.344963	1263.49	26.6651	13.5198	7.05368	247.775	1.22354	0.137135	0.0808558	0.00493809	0.000275114	0.0284681	5.09932	3.0108	0.20192	0.0736312	1.20563	0.424484	76.0353	3.0108			0.53825	10.2863	0.0632052	0.362136	0.298462	7.05039	0.0677822	0.874883	1.26664
33I-6.d	Sardes	epithermal	epithermal IS	marcasite	aggregate of euhedral grains	34.2231	518330	11.4415	141.993	420.451	10.686	1.3382	0.976115	329306	58.902	68.6227	0.476037	0.110269	1.23933	5233.48	81.8801	32.3799	8.51592	575.066	1.93521	0.0805779	0.102427	0.0033652	3.47442e-05	0.0148086	9.10067	5.99773	0.11933	0.16914	5.14812	0.744304	457.414	5.99773			0.416716	16.76	0.0975858	0.364749	0.424161	4.74781	0.0747642	0.976115	1.49641
33I-7.d	Sardes	epithermal	epithermal IS	marcasite	aggregate of euhedral grains	17.4652	300928	9.56974	76.9977	173.43	4.35672	0.428667	0.613647	98252.8	28.6289	40.4775	0.269818	0.10388	0.282611	1250.37	27.8923	14.3164	4.64179	197.04	1.3381	0.124286	0.145295	0.00679101	9.73992e-05	0.0235576	6.34575	4.22974	0.205428	0.139826	2.99161	0.485049	130.658	4.22974			0.366765	10.9765	0.0462692	0.280932	0.19538	3.41749	0.046016	0.586561	1.94012
33I-8.d	Sardes	epithermal	epithermal IS	marcasite	aggregate of euhedral grains	22.1302	416473	8.67279	97.1858	293.675	3.81551	0.573266	0.666369	66951.1	26.2266	51.5165	0.344285	0.0531537	0.191109	1301.6	30.0952	25.0929	8.17138	200.731	1.12105	0.0892393	0.130656	0.00558483	0.000129539	0.0407081	6.48429	5.94002	0.256645	0.12926	3.02401	0.942186	150.078	5.94002			0.357541	9.65643	0.0433167	0.310884	0.278166	3.81551	0.0695944	0.666369	1.37147
33I-10.d	Sardes	epithermal	epithermal IS	marcasite	aggregate of euhedral grains	21.1244	312807	8.5659	76.9664	327.569	6.56282	0.985022	0.544157	229644	47.5968	45.4068	0.3281	0.173003	0.476125	2973.94	94.3042	14.6106	6.12208	337.95	1.23053	0.111294	0.14084	0.00364115	3.73007e-05	0.0181154	8.79995	5.30088	0.13436	0.143654	5.55654	0.714704	347.184	5.30088			0.426725	12.34	0.0310487	0.491763	0.167784	3.76548	0.0590613	0.501088	3.02834
33I-14.d	Sardes	epithermal	epithermal IS	marcasite	aggregate of euhedral grains	22.7017	440141	10.709	173.349	99.3974	3.86842	0.0448908	0.746418	30806.8	7.86503	54.5068	0.24203	0.0289269	5.74448	747.131	14.1245	5.82737	10.6411	458.931	2.09732	0.0617772	0.0171377	0.00457001	0.000347618	0.0231868	1.62798	5.08981	0.118769	0.195846	0.734432	0.993662	69.7666	5.08981			0.237986	11.2411	0.0369053	0.340244	0.391742	2.95192	0.0448908	0.746418	2.09916
33I-16.d	Sardes	epithermal	epithermal IS	marcasite	aggregate of euhedral grains	21.1754	442093	5.85435	155.187	169.886	4.98805	0.0820312	0.987678	29997.1	9.70654	69.6033	0.274592	0.0135018	2.5204	920.194	7.23248	3.33468	21.875	1377.22	1.91185	0.0377244	0.0070479	0.00138819	0.000195164	0.0158834	0.668151	11.8892	0.0505388	0.326569	1.658	3.73654	157.181	11.8892			0.324843	10.8383	0.0741262	0.388693	0.230449	4.98805	0.0591931	0.987678	1.83228
33I-9.d	Sardes	epithermal	epithermal IS	sulfosalt/mix?		1232.21	2.70956e+06	11.1155	80.2406	8030.71	1761.12	74.7421	10.1708	4.89914e+06	92.3721	33.0439	12.5477	20.6272	45.8966	80373.6	4588.8	32.2578	51.5649	13926.3	6.0712	0.138528	0.00663291	0.000435951	2.26888e-06	0.00370269	5.77134	2.97277	0.00237277	0.54619	8.31018	4.63899	7230.74	2.97277			6.5336	151.768	0.486166	6.82897	3.75618	77.2943	0.694204	8.54102	27.9235
[truncated: 92 more columns]

## Sheet: Fakos
sample ID Fakos	loc Fakos	type Fakos	subtype Fakos	mineral Fakos	texture Fakos	Mn (ppm) Fakos	Fe (ppm) Fakos	Co (ppm) Fakos	Ni (ppm) Fakos	Cu (ppm) Fakos	Zn (ppm) Fakos	Ga (ppm) Fakos	Ge (ppm) Fakos	As (ppm) Fakos	Se (ppm) Fakos	Ag (ppm) Fakos	Cd (ppm) Fakos	In (ppm) Fakos	Sn (ppm) Fakos	Sb (ppm) Fakos	Te (ppm) Fakos	Au (ppm) Fakos	Tl (ppm) Fakos	Pb (ppm) Fakos	Bi (ppm) Fakos	Co/Ni (ppm) Fakos	Se/Pb (ppm) Fakos	Bi/Pb (ppm) Fakos	Co/As (ppm) Fakos	Tl/Pb (ppm) Fakos	Sb/Pb (ppm) Fakos	Ag/Co (ppm) Fakos	Ag/Pb (ppm) Fakos	Bi/Co (ppm) Fakos	Se/Co (ppm) Fakos	Tl/Co (ppm) Fakos	Sb/Co (ppm) Fakos	Ag/Co (ppm) Fakos			Mn L.O.D. Howell Fakos	Fe L.O.D. Howell Fakos	Co L.O.D. Howell Fakos	Ni L.O.D. Howell Fakos	Cu L.O.D. Howell Fakos	Zn L.O.D. Howell Fakos	Ga L.O.D. Howell Fakos	Ge L.O.D. Howell Fakos	As L.O.D. Howell Fakos
LM-JB-03-01	Fakos	epithermal	transitional	pyrite	euhedral	16.014	506180	496.209	189.348	12.1017	0.998927	0.0623608	0.568709	532.467	100.887	0.0290871	0.136548	0.0108623	0.109964	0.051584	23.3743	0.0149241	0.019782	10.5668	2.00867	2.62061	9.54753	0.190092	0.931905	0.00187208	0.00488169	5.86186e-05	0.00275267	0.00404803	0.203316	3.98663e-05	0.000103956	5.86186e-05			0.218973	10.3753	0.0269157	0.258888	0.175972	0.998927	0.0623608	0.34962	0.243839
LM-JB-03-02	Fakos	epithermal	transitional	pyrite	euhedral	16.0743	468838	296.726	167.167	4.55879	1.44955	0.0535802	0.486989	1041.89	199.174	0.0200791	0.235825	0.00744728	0.139919	0.045639	7.09645	0.0332366	0.0110894	4.14054	0.904979	1.77503	48.1035	0.218566	0.284795	0.00267825	0.0110225	6.76686e-05	0.00484939	0.00304988	0.671239	3.73725e-05	0.000153808	6.76686e-05			0.331777	9.59622	0.0514392	0.378407	0.307671	1.44955	0.0535802	0.486989	0.380672
LM-JB-03-03	Fakos	epithermal	transitional	pyrite	euhedral	16.9628	479187	219.892	122.022	3.45383	1.29193	0.0344076	0.698271	916.034	114.637	0.0691368	0.141533	0.0056306	0.365042	0.47856	69.0829	0.344386	0.0210496	37.4402	5.47897	1.80207	3.06185	0.146339	0.240048	0.000562218	0.012782	0.000314413	0.00184659	0.0249166	0.521332	9.5727e-05	0.00217635	0.000314413			0.156371	9.75204	0.0322224	0.367912	0.231162	1.29193	0.0344076	0.352353	0.206153
LM-JB-03-04	Fakos	epithermal	transitional	pyrite	euhedral	16.2108	505920	146.634	83.4375	0.299545	1.25361	0.0367376	0.494048	914.964	368.711	0.0181868	0.251385	0.0180579	0.0919792	0.058363	1.21558	0.000552272	0.0125969	0.174241	0.0372547	1.75741	2116.1	0.213811	0.160262	0.072296	0.334956	0.000124029	0.104378	0.000254066	2.5145	8.59072e-05	0.000398019	0.000124029			0.21996	4.91956	0.0220747	0.327981	0.221498	1.25361	0.0367376	0.494048	0.243834
LM-JB-03-05	Fakos	epithermal	transitional	pyrite	euhedral	15.388	498718	9.5036	275.607	8.51514	1.061	0.0479396	0.513741	314.983	12.3167	0.0246798	0.122197	0.0116892	0.094423	1.12288	0.2188	0.0343737	0.0121848	22.8356	0.0637276	0.0344824	0.539365	0.00279071	0.0301718	0.000533589	0.0491724	0.00259689	0.00108076	0.00670563	1.29601	0.00128213	0.118153	0.00259689			0.289051	9.97945	0.0403265	0.189491	0.183668	1.061	0.0479396	0.513741	0.234442
LM-JB-03-06	Fakos	epithermal	transitional	pyrite	euhedral	26.637	472107	462.077	61.3362	8.80932	1.39264	0.24097	1.43216	559.85	76.8218	0.0842038	0.0898936	0.0179838	0.128344	0.625622	12.1794	0.0946745	0.0290419	109.514	7.71979	7.53351	0.701478	0.0704911	0.825358	0.000265188	0.0057127	0.000182229	0.000768884	0.0167067	0.166253	6.28508e-05	0.00135394	0.000182229			0.28153	9.76034	0.0285163	0.232787	0.284349	1.39264	0.0492158	0.295464	0.174872
LM-JB-03-07	Fakos	epithermal	transitional	pyrite	euhedral	15.3315	498013	654.787	47.3501	22.6317	0.995471	0.0561187	0.688213	305.621	62.7842	0.0435965	0.124923	0.0163974	0.145325	0.184315	17.1425	0.0263107	0.0182648	6.38439	0.357169	13.8286	9.83402	0.0559441	2.14248	0.00286086	0.0288695	6.65811e-05	0.0068286	0.000545473	0.0958849	2.78943e-05	0.000281488	6.65811e-05			0.2688	6.8751	0.028291	0.294074	0.212055	0.995471	0.0561187	0.401499	0.189608
LM-JB-03-08	Fakos	epithermal	transitional	pyrite	euhedral	16.1317	488997	1960.61	64.175	38.8329	1.05344	0.0361009	0.543859	390.061	47.0115	0.197223	0.209406	0.0107557	0.139823	0.163704	11.6325	0.0452256	0.0159274	52.8619	9.96168	30.551	0.889326	0.188447	5.02642	0.000301302	0.00309682	0.000100593	0.00373091	0.0050809	0.023978	8.1237e-06	8.34964e-05	0.000100593			0.224328	7.84088	0.0497975	0.279885	0.224821	1.05344	0.0361009	0.396216	0.19966
LM-JB-03-09	Fakos	epithermal	transitional	pyrite	euhedral	14.996	479119	1226.04	16.3416	0.861285	0.800658	0.0367239	0.567204	488.033	238.311	0.037233	0.0904761	0.0124566	0.0733319	0.0601253	53.4886	0.1029	0.0124291	2.71996	0.330067	75.0253	87.6158	0.12135	2.5122	0.00456961	0.0221052	3.03686e-05	0.0136888	0.000269215	0.194375	1.01377e-05	4.90403e-05	3.03686e-05			0.282767	15.1656	0.0328794	0.378184	0.22091	0.800658	0.0367239	0.567204	0.295365
LM-JB-03-10	Fakos	epithermal	transitional	pyrite	euhedral	62.6771	455376	771.159	331.864	40.6988	4.92359	0.145021	0.57788	2043.92	107.22	0.379489	0.193797	0.00866604	0.154318	0.881466	33.6877	0.353305	0.0221966	135.501	39.8829	2.32372	0.791281	0.294336	0.377295	0.000163811	0.00650522	0.000492102	0.00280063	0.0517181	0.139037	2.87835e-05	0.00114304	0.000492102			0.275491	9.86585	0.0303623	0.294611	0.171689	1.12766	0.0406459	0.57788	0.224592
LM-JB-03-11	Fakos	epithermal	transitional	pyrite	euhedral	15.3347	474468	310.444	386.033	0.22508	0.933152	0.0669077	0.581661	809.757	75.0503	0.0345789	0.223703	0.0134936	0.0851366	0.0344649	1.44088	0.0243359	0.0157409	0.322683	0.0656246	0.804192	232.582	0.203371	0.383379	0.0487814	0.106807	0.000111385	0.10716	0.000211389	0.241751	5.07046e-05	0.000111018	0.000111385			0.230636	13.9924	0.0635007	0.295779	0.22508	0.933152	0.0669077	0.389944	0.264881
LM-JB-03-12	Fakos	epithermal	transitional	pyrite	euhedral	15.069	491274	115.77	3594.58	1.56073	1.54055	0.063382	0.730079	3505.43	190.081	0.07187	0.260597	0.0149388	0.0809514	0.0978055	0.889212	0.0634999	0.0142853	6.43304	1.13677	0.0322067	29.5477	0.176709	0.0330258	0.00222062	0.0152036	0.000620802	0.011172	0.00981928	1.64189	0.000123394	0.000844829	0.000620802			0.278235	4.06849	0.0412577	0.324268	0.26671	1.54055	0.063382	0.456011	0.224518
LM-JB-03-13	Fakos	epithermal	transitional	pyrite	subhedral	14.7908	492395	312.337	110.235	0.303412	0.937585	0.0264662	0.755348	391.158	146.151	0.0373143	0.163344	0.00970484	0.120947	0.0437241	43.0377	0.0333553	0.0158768	0.269681	0.0347418	2.83337	541.94	0.128825	0.798494	0.0588724	0.162133	0.000119468	0.138364	0.000111232	0.467927	5.08322e-05	0.00013999	0.000119468			0.229482	8.69765	0.0401464	0.380431	0.303412	0.937585	0.0264662	0.337173	0.272611
LM-JB-03-14	Fakos	epithermal	transitional	pyrite	subhedral	15.7266	472709	1080.23	38.4462	3.33173	1.27006	0.0269489	0.837424	978.958	129.434	0.0667729	0.089625	0.00499516	0.104439	0.248213	101.342	0.542146	0.0244945	27.5533	4.53058	28.0973	4.69758	0.16443	1.10345	0.000888984	0.00900845	6.18134e-05	0.00242341	0.00419408	0.11982	2.26752e-05	0.000229777	6.18134e-05			0.316267	6.41606	0.0285593	0.270707	0.2061	1.27006	0.0269489	0.366169	0.239847
LM-JB-03-15	Fakos	epithermal	transitional	pyrite	subhedral	16.5804	511816	34.4514	58.5752	2.91936	1.02171	0.0365618	0.678329	807.363	243.901	0.0626288	0.102421	0.0066722	0.124281	0.0483132	3.24855	0.0227506	0.0157265	21.1999	4.61688	0.588158	11.5048	0.217778	0.0426716	0.000741822	0.00227894	0.00181789	0.0029542	0.134011	7.07957	0.000456484	0.00140236	0.00181789			0.266616	11.0859	0.0420902	0.560518	0.136114	0.542776	0.0365618	0.316648	0.28563
LM-JB-03-16	Fakos	epithermal	transitional	pyrite	subhedral	16.0681	498922	443.742	58.1175	0.445224	1.2645	0.0846073	0.56572	762.834	123.647	0.0300676	0.22153	0.0122169	0.120293	0.0494525	28.8944	0.0847369	0.0128254	7.14998	1.37053	7.63525	17.2934	0.191682	0.581702	0.00179377	0.00691645	6.77592e-05	0.00420527	0.00308857	0.278647	2.89029e-05	0.000111444	6.77592e-05			0.297059	9.07564	0.0462528	0.379946	0.1979	1.2645	0.0846073	0.56572	0.232996
LM-JB-03-17	Fakos	epithermal	transitional	pyrite	subhedral	15.5844	517290	430.582	43.369	1.23255	0.696212	0.0510426	0.609553	844.785	144.618	0.0137035	0.0038473	0.00662761	0.106436	0.0482508	61.3496	0.296722	0.016827	11.734	3.15284	9.92835	12.3247	0.268693	0.509695	0.00143404	0.00411206	3.18255e-05	0.00116785	0.00732227	0.335865	3.90796e-05	0.000112059	3.18255e-05			0.348596	8.12702	0.0220633	0.250315	0.193299	0.696212	0.0510426	0.609553	0.282143
LM-JB-03-18	Fakos	epithermal	transitional	pyrite	subhedral	15.4596	473000	647.063	172.606	1.43835	1.45568	0.0454401	0.581405	500.196	165.042	0.0379686	0.200598	0.0114448	0.0795548	0.0610759	63.9393	0.181805	0.0210424	9.47785	1.77452	3.7488	17.4135	0.187228	1.29362	0.00222017	0.00644407	5.86785e-05	0.00400604	0.00274243	0.255063	3.25199e-05	9.43894e-05	5.86785e-05			0.242866	9.21594	0.0565628	0.236887	0.226785	1.08847	0.0454401	0.363153	0.328182
LM-JB-14-01	Fakos	epithermal	transitional	pyrite	anhedral, inclusions	15.363	486648	464.771	225.042	0.20656	1.14624	0.178532	1.13971	486.068	102.448	0.0226014	0.161239	0.00508955	0.150371	0.0509532	1.5186	0.111276	0.0181503	1.25611	2.42339	2.06526	81.5595	1.92928	0.956186	0.0144496	0.0405642	4.86291e-05	0.0179931	0.00521416	0.220427	3.90521e-05	0.000109631	4.86291e-05			0.307321	6.97457	0.0265675	0.178268	0.20656	1.14624	0.0545609	0.398031	0.181122
LM-JB-14-02	Fakos	epithermal	transitional	pyrite	anhedral, inclusions	17.2662	488510	166.98	189.104	0.26693	0.822528	0.0293731	0.667588	393.597	115.454	0.0228226	0.244708	0.0120482	0.125934	0.0652682	0.717009	0.0356735	0.0196875	0.560873	0.894685	0.883006	205.847	1.59516	0.424241	0.0351015	0.116369	0.000136679	0.0406913	0.00535804	0.691424	0.000117903	0.000390875	0.000136679			0.287791	11.2635	0.0274868	0.318307	0.236188	0.822528	0.0293731	0.328379	0.168173
LM-JB-14-03	Fakos	epithermal	transitional	pyrite	anhedral, inclusions	15.6717	473360	191.45	986.566	0.444257	1.18497	0.0447428	1.09426	264.328	83.1332	0.02748	0.196325	0.0043681	0.144859	0.0476949	0.273341	0.0130721	0.0110813	0.0363428	0.0167941	0.194057	2287.47	0.462103	0.724287	0.304911	1.31236	0.000143536	0.756134	8.77207e-05	0.43423	5.7881e-05	0.000249125	0.000143536			0.274188	9.27544	0.0381965	0.17748	0.169988	1.18497	0.0447428	0.301976	0.233439
LM-JB-14-04	Fakos	epithermal	transitional	pyrite	anhedral, inclusions	16.344	498146	78.7872	359.505	0.229095	1.05829	0.0306737	0.616792	124.72	197.346	0.0256643	0.218194	0.0100136	0.0936753	0.034348	0.388632	0.0219978	0.0127631	0.0904747	0.299407	0.219155	2181.23	3.30929	0.631712	0.141068	0.379642	0.000325742	0.283663	0.0038002	2.5048	0.000161994	0.000435959	0.000325742			0.170741	7.43384	0.0378123	0.212234	0.229095	1.05829	0.0306737	0.317245	0.151798
LM-JB-14-05	Fakos	epithermal	transitional	pyrite	anhedral, inclusions	16.4772	473278	243.903	644.729	0.161396	0.858597	0.0490142	0.663774	69.753	68.7859	0.0193333	0.18068	0.00947876	0.099277	0.0594717	0.525495	0.0181589	0.00936516	0.0314373	0.19737	0.378304	2188.03	6.2782	3.49668	0.297899	1.89175	7.92664e-05	0.61498	0.000809214	0.282021	3.8397e-05	0.000243833	7.92664e-05			0.219823	8.52566	0.0254347	0.258086	0.161396	0.858597	0.0490142	0.337842	0.130573
LM-JB-14-06	Fakos	epithermal	transitional	pyrite	anhedral, inclusions	15.1027	470046	160.464	529.872	0.189663	0.923966	0.0481507	0.78623	531.878	124.68	0.0333104	0.174393	0.00988402	0.105427	0.0675098	1.98532	0.4559	0.0217316	0.271507	0.0846712	0.302835	459.216	0.311857	0.301693	0.0800407	0.248649	0.000207589	0.122687	0.000527666	0.776999	0.00013543	0.000420717	0.000207589			0.262516	5.69035	0.038365	0.285207	0.189663	0.923966	0.0481507	0.295606	0.160831
LM-JB-14-07	Fakos	epithermal	transitional	pyrite	anhedral, inclusions	15.6028	471273	268.118	371.413	0.160274	1.32619	0.0316853	1.05296	124.854	77.5292	0.0335333	0.131724	0.00856798	0.11982	0.0722202	0.162284	0.0490028	0.0163678	0.020153	0.0280745	0.721887	3847.03	1.39307	2.14745	0.812174	3.58359	0.000125069	1.66394	0.000104709	0.28916	6.10468e-05	0.000269359	0.000125069			0.41713	6.5981	0.0299415	0.255951	0.160274	1.32619	0.0316853	0.293921	0.22161
LM-JB-14-08	Fakos	epithermal	transitional	pyrite	anhedral, inclusions	16.5756	494675	106.169	495.43	0.204949	1.21385	0.0265183	0.882269	761.448	153.577	0.0297225	0.190555	0.0074694	0.100978	0.068035	0.404877	0.080024	0.0110586	0.389474	0.109913	0.214298	394.32	0.282209	0.139431	0.0283937	0.174685	0.000279954	0.0763146	0.00103526	1.44653	0.00010416	0.000640816	0.000279954			0.380455	10.6302	0.0245588	0.392461	0.175796	1.21385	0.0265183	0.367977	0.253841
LM-JB-14-09	Fakos	epithermal	transitional	pyrite	subhedral	18.827	475663	481.22	1123.83	2.95868	1.21289	0.0831583	1.03103	252.578	109.676	1.59929	0.180433	0.00969102	0.129953	15.1849	6.16097	0.0334134	0.757868	30.389	3.48415	0.428197	3.60906	0.114652	1.90523	0.0249389	0.499683	0.00332341	0.0526273	0.00724025	0.227912	0.00157489	0.031555	0.00332341			0.217395	8.81037	0.0472569	0.236245	0.117285	1.21289	0.0710977	0.23206	0.244351
LM-JB-14-10	Fakos	epithermal	transitional	pyrite	subhedral	16.2109	489418	841.037	765.882	0.359749	0.846139	0.0385843	0.494654	258.85	102.922	0.033437	0.119729	0.0126808	0.087478	0.0575609	3.8259	0.0380983	0.0183833	85.3586	1.86795	1.09813	1.20576	0.0218835	3.24912	0.000215366	0.000674342	3.97569e-05	0.000391724	0.002221	0.122375	2.18579e-05	6.84404e-05	3.97569e-05			0.280999	7.09524	0.0612619	0.375076	0.219918	0.846139	0.0385843	0.397594	0.189658
LM-JB-14-11	Fakos	epithermal	transitional	pyrite	anhedral, inclusions	20.0687	470879	57.1731	1432.01	24.455	2.30173	0.498395	0.615202	1829.02	1.50585	4.55185	0.202435	0.00644813	1.44194	197.82	3.28888	0.370645	5.09172	536.883	25.4989	0.0399251	0.00280481	0.0474944	0.0312588	0.00948384	0.368459	0.0796153	0.00847828	0.445996	0.0263385	0.089058	3.46002	0.0796153			0.264194	9.77912	0.0345373	0.224167	0.234834	1.3177	0.0540313	0.479731	0.150339
LM-JB-14-12	Fakos	epithermal	transitional	pyrite	anhedral, inclusions	29.185	466187	106.201	273.548	0.271495	1.2884	0.61116	0.513764	370.286	97.4951	0.0306577	0.0699619	0.0138076	0.234771	0.0664712	1.05435	0.0260697	0.0822128	11.3174	3.18457	0.388233	8.61465	0.281388	0.286807	0.00726432	0.00587339	0.000288678	0.00270891	0.0299864	0.918027	0.000774128	0.000625902	0.000288678			0.269735	7.28322	0.0466515	0.235505	0.224614	0.812671	0.041897	0.392342	0.188881
LM-JB-14-13	Fakos	epithermal	transitional	pyrite	anhedral, inclusions	15.212	462792	60.1126	426.359	14.1226	1.00605	0.0393956	0.83199	3291.2	34.7513	1.79174	0.112864	0.00635465	0.0672402	15.7775	3.38338	0.39483	0.23298	192.965	43.4602	0.140991	0.180091	0.225223	0.0182646	0.00120737	0.0817633	0.0298064	0.00928532	0.722979	0.578104	0.00387573	0.262465	0.0298064			0.154904	9.80397	0.0244646	0.218912	0.190854	1.00605	0.0393956	0.468408	0.224913
LM-JB-14-14	Fakos	epithermal	transitional	pyrite	anhedral, inclusions	15.8027	449750	55.1189	125.658	0.211276	1.4116	0.0349999	1.17325	326.854	130.507	0.0172815	0.13708	0.0066832	0.0525805	0.0577722	0.218635	0.0456182	0.0120728	0.030163	0.0159195	0.438642	4326.73	0.527784	0.168635	0.400253	1.91533	0.000313532	0.572939	0.000288822	2.36774	0.000219033	0.00104814	0.000313532			0.228525	7.98297	0.0267876	0.373606	0.211276	1.4116	0.0349999	0.483258	0.222805
LM29_I_py_1.1	Fakos	epithermal	epithermal HS	pyrite	0	n.a.	461315	12.5003	126.578	166.466	71.5351	n.a.	n.a.	2.94925	64.6585	8.93745	0.303009	n.a.	n.a.	1.2225	33.9846	2.57787	0.0588674	1820.96	7.99979	0.0987558	0.0355078	0.00439316	4.23846	3.23276e-05	0.000671347	0.71498	0.00490809	0.639968	5.17256	0.00470928	0.0977977	0.71498			n.a.	14.0054	0.0332581	0.373262	0.453385	3.41247	n.a.	n.a.	0.2465
LM29_I_py_1.2	Fakos	epithermal	epithermal HS	pyrite	0	n.a.	504089	7.98322	184.431	75.1961	36.9151	n.a.	n.a.	31.4341	104.723	10.7201	0.46208	n.a.	n.a.	148.409	3.19359	0.389341	0.807356	3686.76	7.63518	0.0432857	0.0284053	0.00207097	0.253967	0.000218988	0.0402547	1.34283	0.00290773	0.956403	13.1179	0.101132	18.5902	1.34283			n.a.	41.2524	0.135691	0.803809	1.14921	14.3893	n.a.	n.a.	0.927719
LM29_I_py_1.3	Fakos	epithermal	epithermal HS	pyrite	0	n.a.	526525	213.791	1796.72	1189.87	2.19045	n.a.	n.a.	30.6634	11.9654	13.6219	0.124575	n.a.	n.a.	1.16849	14.9554	0.564912	0.202852	33.8165	57.9038	0.118989	0.353834	1.7123	6.97218	0.00599861	0.0345539	0.0637161	0.402818	0.270843	0.0559679	0.000948834	0.00546559	0.0637161			n.a.	13.7223	0.036138	0.270166	0.659413	2.19045	n.a.	n.a.	0.205525
LM29_I_py_1.6	Fakos	epithermal	epithermal HS	pyrite	0	n.a.	447951	65.7652	563.114	63.1298	3.38182	n.a.	n.a.	212.895	6.21274	3.55125	0.161408	n.a.	n.a.	9.66373	13.3275	0.260536	0.029567	13.9998	0.846125	0.116788	0.443773	0.0604384	0.30891	0.00211195	0.690276	0.053999	0.253664	0.0128659	0.0944685	0.000449584	0.146943	0.053999			n.a.	14.3631	0.0397278	0.338472	0.569697	3.38182	n.a.	n.a.	0.269305
LM29_I_py_3	Fakos	epithermal	epithermal HS	pyrite	0	n.a.	448107	0.0956869	56.4668	2.46589	3.20335	n.a.	n.a.	0.320004	38.5335	0.0245091	0.269203	n.a.	n.a.	0.172226	0.251032	0.0196546	0.0105054	0.127101	0.0540641	0.00169457	303.172	0.425363	0.299018	0.0826537	1.35503	0.256138	0.192831	0.565011	402.704	0.109789	1.79989	0.256138			n.a.	17.6686	0.0453679	0.322825	0.475495	3.20335	n.a.	n.a.	0.320004
LM29_I_py_5	Fakos	epithermal	epithermal HS	pyrite	0	n.a.	471460	0.0366508	2.75697	1019.03	3.36799	n.a.	n.a.	0.210904	48.3467	0.423363	0.198505	n.a.	n.a.	0.158597	2.43723	0.0522743	0.00665406	0.581837	3.03678	0.0132939	83.0932	5.2193	0.17378	0.0114363	0.27258	11.5513	0.727631	82.8572	1319.12	0.181553	4.32725	11.5513			n.a.	19.3235	0.0366508	0.243241	0.527846	3.36799	n.a.	n.a.	0.210904
LM29_I_py_2	Fakos	epithermal	epithermal HS	pyrite	0	n.a.	453406	0.0410502	10.741	534.093	4.56609	n.a.	n.a.	0.251869	2.90687	2.38826	0.087807	n.a.	n.a.	0.287062	2.23947	0.128548	0.0111797	1.65954	8.66374	0.00382182	1.75162	5.22058	0.162983	0.00673664	0.172977	58.1789	1.43911	211.052	70.8125	0.272342	6.99293	58.1789			n.a.	11.4049	0.0285563	0.279787	0.483556	4.56609	n.a.	n.a.	0.176401
LM29_III_py_1	Fakos	epithermal	epithermal HS	pyrite	0	n.a.	459134	1810.57	5996.31	662.104	13.9102	n.a.	n.a.	52.0134	44.6732	36.9058	0.100222	n.a.	n.a.	0.96785	38.3289	0.391053	0.0942204	98.0318	146.632	0.301947	0.455701	1.49576	34.8097	0.00096112	0.00987281	0.0203836	0.376468	0.0809868	0.0246735	5.20391e-05	0.000534555	0.0203836			n.a.	23.1474	0.0416695	0.49189	0.782229	3.47942	n.a.	n.a.	0.277477
LM29_III_py_2	Fakos	epithermal	epithermal HS	pyrite	0	n.a.	447497	0.156828	0.755956	630.187	3.41661	n.a.	n.a.	0.231621	27.2086	0.044345	0.137725	n.a.	n.a.	0.078179	2.0791	0.0578562	0.0104775	0.0931002	9.638	0.207457	292.251	103.523	0.67709	0.11254	0.839729	0.282762	0.476314	61.4559	173.493	0.0668091	0.498502	0.282762			n.a.	14.7267	0.0409448	0.188218	0.519343	3.41661	n.a.	n.a.	0.231621
LM29_III_py_4	Fakos	epithermal	epithermal HS	pyrite	0	n.a.	428116	1.4497	6.44191	485.726	4.2671	n.a.	n.a.	0.375403	5.29023	1.34184	0.118331	n.a.	n.a.	0.169153	3.27568	0.114388	0.0105496	3.26384	8.08375	0.225042	1.62086	2.47676	3.86172	0.00323226	0.0518266	0.925599	0.411125	5.57614	3.64918	0.00727706	0.116681	0.925599			n.a.	14.8258	0.0526024	0.349684	0.569238	4.2671	n.a.	n.a.	0.192634
LM29_III_py_5	Fakos	epithermal	epithermal HS	pyrite	0	n.a.	451763	0.0480007	1.1914	1259.71	2.64921	n.a.	n.a.	0.293174	265.772	0.0270243	0.187995	n.a.	n.a.	0.0761265	0.349245	0.0343937	0.00657842	0.144321	0.673222	0.0402894	1841.53	4.66476	0.163728	0.0455819	0.527481	0.562997	0.187251	14.0253	5536.83	0.137048	1.58595	0.562997			n.a.	11.677	0.0480007	0.295667	0.477878	2.64921	n.a.	n.a.	0.293174
LM29_V_py_1.1	Fakos	epithermal	epithermal HS	pyrite	0	n.a.	439050	9.75783	62.7045	1105.6	3.68517	n.a.	n.a.	0.544063	66.1025	1.22327	0.261382	n.a.	n.a.	0.363386	0.854145	0.0478813	0.0114765	1.01652	19.361	0.155616	65.0283	19.0464	17.9351	0.01129	0.357481	0.125363	1.20339	1.98416	6.77431	0.00117613	0.0372405	0.125363			n.a.	19.7785	0.0388708	0.272507	0.541063	3.68517	n.a.	n.a.	0.476369
LM29_V_py_1.2	Fakos	epithermal	epithermal HS	pyrite	0	n.a.	427826	2.16113	3.34678	360.019	3.81323	n.a.	n.a.	0.33085	13.631	0.041032	0.203059	n.a.	n.a.	0.0682594	0.354809	0.0243866	0.0161459	0.207637	1.75828	0.645734	65.6482	8.46806	6.53206	0.0777605	0.328744	0.0189863	0.197614	0.813593	6.30734	0.00747106	0.031585	0.0189863			n.a.	18.548	0.0427707	0.204957	0.564511	3.81323	n.a.	n.a.	0.33085
LM29_V_py_1.3	Fakos	epithermal	epithermal HS	pyrite	0	n.a.	446561	0.0753178	20.686	1368.91	2.70659	n.a.	n.a.	1.08275	15.3788	14.6518	0.182025	n.a.	n.a.	1.01733	10.0671	0.52135	0.00733499	5.51889	50.8856	0.003641	2.78657	9.22025	0.0695615	0.00132907	0.184337	194.533	2.65484	675.612	204.185	0.0973873	13.5072	194.533			n.a.	15.8775	0.0322717	0.297297	0.558151	2.70659	n.a.	n.a.	0.325306
LM29_VII_py_1	Fakos	epithermal	epithermal HS	pyrite	0	n.a.	434357	0.40564	26.9351	1632.08	2.53976	n.a.	n.a.	0.630644	81.9611	2.33769	0.102297	n.a.	n.a.	0.660445	10.027	0.335272	0.00763326	3.30252	23.4172	0.0150599	24.8178	7.0907	0.643216	0.00231134	0.199982	5.76296	0.707851	57.7289	202.054	0.0188178	1.62815	5.76296			n.a.	13.7022	0.0351005	0.178903	0.347994	2.23242	n.a.	n.a.	0.278086
LM29_VII_py_3	Fakos	epithermal	epithermal HS	pyrite	0	n.a.	461855	52.6443	329.646	5890.66	4.68937	n.a.	n.a.	18.1802	160.253	16.9692	0.0950162	n.a.	n.a.	27.1224	17.2069	0.47972	0.0817624	145.986	54.8175	0.159699	1.09772	0.375498	2.89568	0.000560069	0.185788	0.322336	0.116238	1.04128	3.04407	0.00155311	0.515202	0.322336			n.a.	15.5411	0.0271932	0.217877	0.425322	3.13845	n.a.	n.a.	0.206252
LM29_IX_py_1.1	Fakos	epithermal	epithermal HS	pyrite	0	n.a.	444279	0.0496106	0.27145	123.258	2.3296	n.a.	n.a.	0.222411	2.32393	0.02502	0.158458	n.a.	n.a.	0.0367309	0.410347	0.0168718	0.0111623	0.137492	0.789488	0.182761	16.9023	5.74205	0.223059	0.0811847	0.267148	0.504328	0.181974	15.9137	46.8434	0.224998	0.740383	0.504328			n.a.	16.1613	0.0496106	0.27145	0.595839	2.3296	n.a.	n.a.	0.222411
LM29_IX_py_1.2	Fakos	epithermal	epithermal HS	pyrite	0	n.a.	472948	1.74709	9.73049	521.26	3.58167	n.a.	n.a.	0.307973	90.0213	0.0351734	0.165296	n.a.	n.a.	0.047831	0.13528	0.0262999	0.014743	0.140116	0.0944859	0.179547	642.476	0.674339	5.67285	0.10522	0.341367	0.0201326	0.25103	0.054082	51.5266	0.00843862	0.0273776	0.0201326			n.a.	34.7449	0.0443378	0.402404	0.589829	3.58167	n.a.	n.a.	0.307973
LM29_IX_py_1.3	Fakos	epithermal	epithermal HS	pyrite	0	n.a.	422973	30.0258	71.9007	603.452	2.38203	n.a.	n.a.	47.1684	59.8794	0.090913	0.0953318	n.a.	n.a.	5.74835	0.286632	0.115652	0.00820931	1.84954	26.9025	0.417601	32.3752	14.5455	0.636566	0.00443855	3.10798	0.00302783	0.0491542	0.895978	1.99426	0.000273408	0.191447	0.00302783			n.a.	17.4311	0.0319315	0.173377	0.401219	2.38203	n.a.	n.a.	0.199932
LM29_X_py_1	Fakos	epithermal	epithermal HS	pyrite	0	n.a.	423216	0.0488194	1.24677	562.995	2.17229	n.a.	n.a.	0.174603	3.9776	0.067707	0.16325	n.a.	n.a.	0.0691708	2.19585	0.0325539	0.0106414	0.0587106	5.6615	0.0391568	67.7492	96.4306	0.279603	0.181251	1.17816	1.38689	1.15323	115.968	81.4757	0.217974	1.41687	1.38689			n.a.	22.6312	0.0473765	0.196811	0.550294	2.17229	n.a.	n.a.	0.174603
LM29_X_py_2	Fakos	epithermal	epithermal HS	pyrite	0	n.a.	385683	0.0309652	7.35443	584.144	3.00584	n.a.	n.a.	0.490365	4.21975	0.898126	0.108445	n.a.	n.a.	0.829941	4.57438	0.108605	0.00853135	0.412797	20.4145	0.00421042	10.2223	49.454	0.0631474	0.0206672	2.01053	29.0043	2.17571	659.271	136.274	0.275514	26.8023	29.0043			n.a.	15.5517	0.0309652	0.224407	0.505574	3.00584	n.a.	n.a.	0.259081
LM29_XI_py_6	Fakos	epithermal	epithermal HS	pyrite	0	n.a.	350756	0.0573237	3.77514	881.812	3.447	n.a.	n.a.	0.207927	163.733	0.411431	0.182593	n.a.	n.a.	0.0787694	2.24044	0.0167611	0.00770044	0.70288	5.28304	0.0151845	232.946	7.51627	0.275692	0.0109555	0.112067	7.17732	0.58535	92.1615	2856.29	0.134333	1.37411	7.17732			n.a.	14.4483	0.0265451	0.195457	0.518369	3.447	n.a.	n.a.	0.207927
LM29_XI_py_8	Fakos	epithermal	epithermal HS	pyrite	0	n.a.	362964	85.9647	200.371	599.414	3.61377	n.a.	n.a.	3.3519	38.9861	1.47829	0.110061	n.a.	n.a.	8.69079	2.16113	0.137371	0.0190161	452.462	15.3544	0.429028	0.0861642	0.0339352	25.6466	4.2028e-05	0.0192078	0.0171964	0.00326721	0.178613	0.453513	0.000221208	0.101097	0.0171964			n.a.	14.6882	0.0213262	0.246191	0.33672	3.61377	n.a.	n.a.	0.228434
LM-JB-6a-01	Fakos	epithermal	epithermal IS	pyrite	euhedral	23.4568	543004	4.03531	269.775	167.734	1.97522	0.0507804	0.896111	17598.3	5.48364	9.84708	0.216102	0.020496	0.153709	286.163	6.89568	13.0443	0.726975	931.788	0.30944	0.0149581	0.00588508	0.000332092	0.000229301	0.000780194	0.307112	2.44023	0.0105679	0.076683	1.35892	0.180154	70.9147	2.44023			0.516951	12.8465	0.052073	0.628236	0.324543	1.97522	0.0507804	0.717021	0.453755
LM-JB-6A-02	Fakos	epithermal	epithermal IS	pyrite	euhedral	21.6916	543829	18.5059	1482.43	167.845	1.23862	0.0477013	0.606441	14254.8	4.65439	8.84828	0.296109	0.0149709	0.138811	226.599	10.2726	8.19395	0.331088	769.625	0.318419	0.0124835	0.00604761	0.000413732	0.00129822	0.000430193	0.294428	0.478133	0.0114969	0.0172063	0.251509	0.0178909	12.2447	0.478133			0.368208	10.5164	0.0386488	0.443952	0.405929	1.23862	0.0477013	0.606441	0.352984
LM-JB-6A-03	Fakos	epithermal	epithermal IS	pyrite	euhedral	45.6612	552486	4.69481	504.594	164.692	1.63542	0.0650203	1.42095	27952.5	3.92012	2.64768	0.274988	0.0100494	0.156922	62.6847	3.30542	9.10496	0.233022	378.465	0.0879477	0.00930414	0.0103579	0.00023238	0.000167957	0.000615702	0.165629	0.563959	0.00699585	0.018733	0.834989	0.0496339	13.3519	0.563959			0.468027	8.34495	0.0718314	0.369954	0.347109	1.63542	0.0650203	0.634816	0.253713
LM-JB-6A-04	Fakos	epithermal	epithermal IS	pyrite	subhedral	22.3517	525431	122.019	683.733	1.8665	1.42593	0.0673284	1.19667	948.332	41.4231	0.0421799	0.152585	0.0109616	0.141415	0.958703	6.22039	0.363123	0.0297929	9.63189	1.22995	0.178459	4.30062	0.127695	0.128667	0.00309315	0.0995343	0.000345684	0.00437919	0.01008	0.339482	0.000244167	0.00785703	0.000345684			0.524307	11.3408	0.0513104	0.511272	0.28444	1.42593	0.0673284	1.19667	0.436895
LM-JB-6A-05	Fakos	epithermal	epithermal IS	pyrite	subhedral	28.7631	478526	91.348	536.628	30.7153	10.2626	0.556364	0.558773	7839.08	19.1686	0.337243	0.151909	0.00775497	0.183745	35.6577	3.18026	0.194111	0.0503109	328.077	25.6184	0.170226	0.0584271	0.0780865	0.0116529	0.000153351	0.108687	0.00369185	0.00102794	0.280448	0.209842	0.000550761	0.39035	0.00369185			0.330519	7.26857	0.0720823	0.357503	0.274319	1.45835	0.0334385	0.32695	0.388585
LM-JB-6A-06	Fakos	epithermal	epithermal IS	pyrite	euhedral, dissolution	18.6309	472834	29.2701	79.7154	54.8463	1.16638	0.0580168	0.540928	13083.4	17.5978	0.395791	0.100676	0.00520336	0.103654	74.4112	4.50654	1.6224	0.0143108	712.647	71.3034	0.367182	0.0246936	0.100054	0.00223719	2.00811e-05	0.104415	0.013522	0.000555382	2.43605	0.601222	0.00048892	2.54223	0.013522			0.306453	8.15009	0.0423069	0.449816	0.282036	1.16638	0.0580168	0.540928	0.444441
LM-JB-6A-07	Fakos	epithermal	epithermal IS	pyrite	subhedral	20.4585	530227	0.0842752	3.97043	10.3977	2.32988	0.0527005	0.869609	0.464819	2.46861	0.0663334	0.283544	0.0104332	0.142512	0.0618493	0.00243903	0.0284108	0.0121568	1.79568	0.0251601	0.0212257	1.37475	0.0140114	0.181307	0.00677003	0.0344434	0.787105	0.0369406	0.298546	29.2922	0.144251	0.733896	0.787105			0.303912	8.52944	0.0842752	0.247617	0.268429	2.32988	0.0527005	0.869609	0.464819
LM-JB-6A-08	Fakos	epithermal	epithermal IS	pyrite	subhedral	20.255	542170	0.0459432	5.84141	17.2178	1.77402	0.0610279	0.412478	0.410482	2.62886	0.0453196	0.120992	0.0156148	0.10871	0.0950707	0.181651	0.0260051	0.0269122	0.455714	0.0173907	0.00786509	5.76868	0.0381615	0.111925	0.0590552	0.208619	0.986425	0.0994474	0.378526	57.2199	0.585772	2.06931	0.986425			0.293879	9.25284	0.0459432	0.320401	0.347905	1.77402	0.0610279	0.412478	0.410482
LM-JB-6A-09	Fakos	epithermal	epithermal IS	pyrite	subhedral	21.8327	539905	0.0499147	0.704976	6.29098	2.11962	0.0734674	1.13335	0.725606	2.57563	0.153212	0.299383	0.0115763	0.13512	0.0871594	0.750821	0.000623701	0.027516	1.77043	0.028392	0.0708034	1.45481	0.0160368	0.0687904	0.015542	0.0492308	3.06949	0.0865399	0.56881	51.6006	0.551261	1.74617	3.06949			0.402409	9.13068	0.0499147	0.704976	0.297379	2.11962	0.0734674	0.692422	0.725606
LM-JB-6A-12	Fakos	epithermal	epithermal IS	pyrite	subhedral	67.0304	488150	14.517	54.7696	15.4269	5.14547	0.487224	0.574426	27.1709	26.5489	0.683794	0.0931174	0.0102922	0.105464	0.392291	8.15265	0.060788	0.0271953	20.8957	3.9853	0.265055	1.27055	0.190724	0.534284	0.00130148	0.0187738	0.047103	0.0327242	0.274527	1.82882	0.00187334	0.0270229	0.047103			0.353589	10.0028	0.0511664	0.434712	0.332559	1.68643	0.115378	0.574426	0.437606
LM-JB-6A-13	Fakos	epithermal	epithermal IS	pyrite	subhedral	38.257	465754	69.6854	494.714	9.58577	71.4517	0.119669	0.607741	89.4461	6.02433	0.41091	0.307491	0.00771543	0.064061	1.68601	2.39278	0.226258	0.0363742	136.979	1.68293	0.14086	0.0439798	0.012286	0.779077	0.000265545	0.0123085	0.00589664	0.00299979	0.0241504	0.0864503	0.000521977	0.0241946	0.00589664			0.469747	6.87612	0.0405619	0.344006	0.187083	1.22399	0.0394572	0.329482	0.321448
LM-JB-6A-14	Fakos	epithermal	epithermal IS	pyrite	anhedral	48.6585	455972	345.718	830.375	5.92838	3.68312	0.620045	0.547721	990.867	51.8065	0.336124	0.352249	0.0130399	0.329797	5.5694	5.94508	0.119209	0.255116	53.0182	9.5259	0.41634	0.977145	0.179672	0.348904	0.00481186	0.105047	0.000972249	0.00633978	0.027554	0.149852	0.000737931	0.0161097	0.000972249			0.224986	8.61428	0.0249671	0.293149	0.322421	1.59379	0.0841861	0.547721	0.464232
LM-JB-6A-15	Fakos	epithermal	epithermal IS	pyrite	subhedral	38.8753	502154	288.129	972.715	1.67323	4.35084	0.0908903	0.808927	137.405	44.9226	0.225461	0.269056	0.00946758	0.183862	0.180288	1.6532	0.0298103	0.0281495	2.57979	4.40696	0.296211	17.4133	1.70826	2.09693	0.0109115	0.0698849	0.0007825	0.0873951	0.0152951	0.155911	9.76974e-05	0.000625721	0.0007825			0.325752	14.0952	0.0603385	0.308907	0.251399	1.38018	0.0908903	0.808927	0.380111
LM-JB-6A-16	Fakos	epithermal	epithermal IS	pyrite	subhedral	64.1256	509907	50.7119	930.321	29.2573	89.9518	0.194236	0.628438	453.193	41.8671	5.6313	0.221106	0.0263377	0.268194	2.0188	7.93316	0.527482	0.136707	242.098	1.44067	0.0545101	0.172935	0.00595077	0.111899	0.000564674	0.00833875	0.111045	0.0232604	0.0284089	0.825587	0.00269575	0.0398091	0.111045			0.40321	9.75098	0.0477304	0.391004	0.330884	1.21675	0.0591161	0.628438	0.502996
LM-JB-6A-17	Fakos	epithermal	epithermal IS	pyrite	subhedral	35.7954	448311	84.1995	576.952	1.09162	1.3331	0.054759	0.593472	266.007	37.7778	0.060692	0.255296	0.013631	0.111013	0.142828	3.76822	0.0282495	0.0101295	2.83189	0.80901	0.145938	13.3401	0.285678	0.316531	0.00357693	0.0504355	0.000720812	0.0214316	0.00960825	0.448671	0.000120304	0.0016963	0.000720812			0.289019	8.84527	0.0499485	0.279668	0.293367	1.3331	0.054759	0.593472	0.299717
LM-JB-6A-18	Fakos	epithermal	epithermal IS	pyrite	euhedral	28.8296	466355	49.6802	247.23	147.356	1.88802	0.0679306	1.2935	435.855	79.4594	367.7	0.293602	0.0176434	0.106882	11.3191	223.469	0.462336	0.0822866	920.175	15.7156	0.200947	0.0863525	0.0170789	0.113983	8.94249e-05	0.0123011	7.40133	0.399598	0.316335	1.59942	0.00165632	0.22784	7.40133			0.284289	10.0791	0.0702799	0.394301	0.231128	1.88802	0.0679306	0.503015	0.323224
LM-JB-7A-04	Fakos	epithermal	epithermal IS	pyrite	subhedral	18.8504	464009	19.6651	40.3854	404.622	31.3706	0.19096	0.815863	662.048	4.06986	14.4986	1.26265	0.282379	0.584237	71.6302	7.07138	0.646972	0.201891	100.492	0.136799	0.486935	0.0404996	0.0013613	0.0297034	0.00200904	0.712798	0.737273	0.144276	0.00695643	0.206959	0.0102665	3.6425	0.737273			0.293101	10.6933	0.041741	0.247027	0.304787	1.07912	0.0585152	0.409976	0.367582
LM-JB-7A-05	Fakos	epithermal	epithermal IS	pyrite	subhedral	16.6767	441734	9.42466	28.9226	1303.1	59.5106	1.06356	0.889554	123.9	2.88333	11.8513	3.55254	0.475352	2.77536	27.1117	4.40712	0.295546	0.164237	61.2641	0.127278	0.325858	0.047064	0.00207753	0.0760666	0.0026808	0.442537	1.25748	0.193446	0.0135048	0.305935	0.0174263	2.87667	1.25748			0.265963	9.14509	0.027264	0.373262	0.230883	1.11197	0.0557569	0.467045	0.346782
LM-JB-7A-06	Fakos	epithermal	epithermal IS	pyrite	subhedral	30.0315	463372	55.0666	284.039	54.9884	4.47829	0.0500808	0.787574	342.284	6.87595	9.3249	0.329351	0.0180156	0.0826489	4.8012	42.4131	0.687653	0.143121	45.7895	0.0249531	0.19387	0.150164	0.000544952	0.16088	0.00312563	0.104854	0.169339	0.203647	0.000453144	0.124866	0.00259905	0.0871889	0.169339			0.277982	7.35748	0.0306238	0.331137	0.325717	0.989942	0.0500808	0.787574	0.352241
LM-JB-7A-07	Fakos	epithermal	epithermal IS	pyrite	subhedral	112.629	464496	69.1906	245.043	20.8419	2.11453	0.175021	0.804715	540.289	4.61163	9.05188	0.231671	0.0123832	0.147167	6.98846	21.9698	2.60082	0.418578	97.4232	0.0533635	0.282361	0.047336	0.000547749	0.128062	0.00429649	0.071733	0.130825	0.0929129	0.000771253	0.066651	0.00604964	0.101003	0.130825			0.233161	8.43603	0.0495433	0.509548	0.267043	1.09773	0.0382903	0.804715	0.314773
LM-JB-7A-13	Fakos	epithermal	epithermal IS	pyrite	subhedral	32.0837	415108	2.88091	18.3541	41.7762	1.47131	0.0769639	0.545971	32.8485	3.26039	4.29353	0.23339	0.0101218	0.113868	3.3651	14.4753	0.429468	0.0825278	67.4046	0.0144684	0.156963	0.0483704	0.00021465	0.0877031	0.00122436	0.0499239	1.49034	0.0636979	0.00502215	1.13172	0.0286464	1.16807	1.49034			0.290354	8.98439	0.0532517	0.295027	0.249942	1.47131	0.0769639	0.328585	0.218602
LM-JB-7A-14	Fakos	epithermal	epithermal IS	pyrite	subhedral	36.4403	443418	6.20899	16.3027	1.5715	1.14408	0.0512826	0.625374	16.8899	4.13914	0.341008	0.137853	0.0178231	0.153975	2.48806	8.56799	0.0278779	0.0451079	49.4187	0.00935935	0.380858	0.0837565	0.000189389	0.367615	0.00091277	0.0503465	0.0549217	0.00690039	0.00150739	0.666636	0.00726493	0.400719	0.0549217			0.260346	6.6743	0.0331353	0.257467	0.230059	1.14408	0.0372579	0.625374	0.172327
LM-JB-7A-15	Fakos	epithermal	epithermal IS	pyrite	subhedral	36.5749	424669	12.9655	33.8078	2.21086	1.52328	0.0555403	0.748629	142.628	4.2867	0.498296	0.21152	0.0105382	0.145086	5.06511	12.7966	0.211515	0.0431923	68.5968	0.00973565	0.383507	0.0624913	0.000141926	0.0909045	0.000629654	0.0738389	0.0384325	0.00726413	0.000750889	0.330624	0.00333132	0.39066	0.0384325			0.24706	7.49314	0.0387576	0.271444	0.3269	1.52328	0.0555403	0.748629	0.279752
LM-JB-7A-16	Fakos	epithermal	epithermal IS	pyrite	euhedral	23.0797	412710	13.2951	31.8981	10.512	1.03325	0.042821	0.400725	69.239	4.50366	1.00722	0.155789	0.00924742	0.111557	0.843522	11.0044	0.0487452	0.0173896	12.6092	0.0158572	0.4168	0.357172	0.00125759	0.192018	0.00137912	0.0668973	0.0757585	0.0798797	0.00119271	0.338745	0.00130796	0.0634459	0.0757585			0.228087	8.48712	0.0395201	0.299205	0.209792	1.03325	0.042821	0.372619	0.225402
LM-JB-7A-17	Fakos	epithermal	epithermal IS	pyrite	euhedral	52.534	431039	83.5753	292.159	15.194	1.73269	0.055224	0.521112	52.2252	5.7876	24.7011	0.183299	0.00546919	0.120024	9.60124	60.4423	2.08073	0.512224	150.339	0.896774	0.286061	0.038497	0.00596501	1.60028	0.00340713	0.0638639	0.295556	0.164303	0.0107301	0.0692502	0.0061289	0.114881	0.295556			0.270922	4.48811	0.0695569	0.311575	0.210681	1.73269	0.055224	0.481581	0.247155
LM-JB-7A-21	Fakos	epithermal	epithermal IS	pyrite	subhedral	116.147	398259	81.7884	363.001	22.0291	2.1962	0.470718	0.46539	508.357	9.19799	4.30356	0.298765	0.00773479	0.0999794	19.6829	59.5665	0.476495	0.728406	170.431	0.180362	0.225312	0.053969	0.00105827	0.160888	0.00427391	0.115489	0.0526182	0.025251	0.00220522	0.112461	0.00890598	0.240656	0.0526182			0.304215	7.53113	0.0379819	0.315993	0.258112	1.47905	0.0394547	0.46539	0.243808
LM-JB-7A-22	Fakos	epithermal	epithermal IS	pyrite	subhedral	28.8235	423640	79.6795	220.604	5.39882	2.02776	1.00172	0.722477	26.0514	10.7823	1.69893	0.176053	0.0134688	0.178107	1.54581	6.15353	0.131644	0.0764197	27.8408	0.0583931	0.361187	0.387283	0.00209739	3.05855	0.00274488	0.0555231	0.021322	0.061023	0.00073285	0.135321	0.000959089	0.0194003	0.021322			0.309365	10.8354	0.0366924	0.450049	0.321141	2.02776	0.0685181	0.722477	0.3789
LM-JB-7A-23	Fakos	epithermal	epithermal IS	pyrite	subhedral	54.2087	414229	2.70812	9.42945	6.55827	2.09456	0.0905524	0.706615	49.6543	3.06466	7.32934	0.155611	0.00701197	0.123637	3.396	16.3843	0.609834	0.0325307	67.3119	0.0100518	0.287199	0.0455292	0.000149332	0.0545396	0.000483284	0.0504517	2.70643	0.108886	0.00371173	1.13165	0.0120123	1.254	2.70643			0.242619	9.49867	0.051234	0.323615	0.291216	2.09456	0.0905524	0.706615	0.348905
LM-JB-7A-24	Fakos	epithermal	epithermal IS	pyrite	subhedral	54.9668	400211	57.235	83.2807	3.33828	2190.55	0.117689	0.622201	364.416	3.74245	1.53028	29.6802	0.0614043	0.0739465	2.46662	37.3478	0.353132	0.0188799	56.0343	0.0463773	0.687254	0.0667884	0.000827659	0.15706	0.000336935	0.0440197	0.0267368	0.0273097	0.000810296	0.0653873	0.000329867	0.0430963	0.0267368			0.281467	6.45113	0.0574675	0.255961	0.190609	0.860295	0.0459892	0.622201	0.203977
LM-JB-7d-01	Fakos	epithermal	epithermal IS	pyrite	anhedral	151.667	504971	8.83998	294.581	6.60214	5.54944	0.142765	1.16957	1274.02	14.165	2.67911	0.398911	0.00904581	0.176295	5.52609	13.0909	0.288173	0.0569907	68.0736	0.0533571	0.0300087	0.208083	0.000783815	0.00693862	0.000837192	0.0811781	0.303068	0.0393562	0.00603589	1.60237	0.00644692	0.625125	0.303068			0.473917	12.6592	0.0743213	0.420435	0.542372	2.09246	0.0784697	1.16957	0.386768
LM-JB-7D-03	Fakos	epithermal	epithermal IS	pyrite	anhedral, cracked	17.0044	497841	37.2448	0.532336	0.605117	1.88323	0.0512659	0.636875	0.279835	141.195	0.027959	0.221633	0.00947981	0.142058	0.093878	0.530779	0.0234176	0.0230175	0.0353968	0.0117328	69.9649	3988.91	0.331464	133.096	0.650272	2.65216	0.000750681	0.789873	0.000315017	3.79099	0.000618006	0.00252057	0.000750681			0.377717	14.2223	0.0738228	0.532336	0.237036	1.88323	0.0512659	0.636875	0.279835
LM-JB-7D-04	Fakos	epithermal	epithermal IS	pyrite	anhedral, cracked	15.9809	502946	1861.28	11.4481	25.2511	1.13682	0.0614599	0.456839	26.581	239.059	0.0169296	0.244918	0.0125649	0.135876	0.0719579	16.4633	0.0225691	0.0238852	0.997726	0.114842	162.584	239.604	0.115104	70.0231	0.0239396	0.0721219	9.09567e-06	0.0169682	6.17006e-05	0.128438	1.28326e-05	3.86603e-05	9.09567e-06			0.380885	7.03693	0.0451413	0.288397	0.201295	1.13682	0.0614599	0.451928	0.195692
LM-JB-7D-05	Fakos	epithermal	epithermal IS	pyrite	anhedral, cracked	15.6464	473950	26.4474	0.519694	179.615	0.921575	0.0547952	0.509129	60.3651	181.446	0.0299258	0.304397	0.00566982	0.130802	0.073355	12.4484	0.031148	0.0256945	0.197231	0.0379767	50.8903	919.969	0.192549	0.438123	0.130276	0.371924	0.00113152	0.15173	0.00143593	6.86066	0.000971533	0.00277362	0.00113152			0.292656	7.92142	0.07096	0.368972	0.386497	0.921575	0.0547952	0.509129	0.227785
LM-JB-7D-06	Fakos	epithermal	epithermal IS	pyrite	anhedral, cracked	19.0799	490259	83.2054	5.04596	122.694	32.4112	0.0493152	0.676497	44.7674	79.304	0.381132	0.971102	0.0595652	0.201034	0.117119	20.7228	0.067893	0.0187026	11.2038	1.79475	16.4895	7.0783	0.160191	1.85862	0.0016693	0.0104535	0.00458061	0.034018	0.0215701	0.953111	0.000224776	0.00140759	0.00458061			0.266142	11.5222	0.057799	0.408027	0.226368	1.45741	0.0493152	0.676497	0.188732
LM-JB-7D-08	Fakos	epithermal	epithermal IS	pyrite	anhedral	17.0781	523908	1.88929	2.5355	7562.72	1.17421	0.0679269	0.541719	0.680833	559.738	7.2366	0.24116	1.0511	0.141966	1.00198	2.97293	0.0363943	0.015882	292.941	5.00828	0.745134	1.91075	0.0170965	2.77497	5.42158e-05	0.0034204	3.83033	0.0247033	2.65088	296.269	0.00840636	0.530345	3.83033			0.277243	10.3174	0.0583445	0.258657	0.248949	0.861417	0.0679269	0.322853	0.243399
LM-JB-7D-09	Fakos	epithermal	epithermal IS	pyrite	anhedral	17.163	513283	5.60766	29.1954	142.424	1.1879	0.0549899	0.45871	5.70166	430.659	0.453504	0.219426	0.0174671	0.11339	0.0681257	0.514209	0.0290356	0.0105442	173.56	1.08847	0.192073	2.48133	0.00627143	0.983513	6.07525e-05	0.000392519	0.0808723	0.00261295	0.194104	76.7984	0.00188032	0.0121487	0.0808723			0.39528	6.7148	0.071674	0.387196	0.164672	1.1879	0.0549899	0.45871	0.2481
LM-JB-7D-12	Fakos	epithermal	epithermal IS	pyrite	anhedral, cracked	17.6376	511409	5.57604	0.375165	5.99276	1.57185	0.0610153	0.694019	0.294947	84.3199	0.0161357	0.142443	0.00736588	0.137162	0.0630129	0.266539	0.0292413	0.0109865	0.0311154	0.0151098	14.8629	2709.91	0.485605	18.9053	0.35309	2.02513	0.00289375	0.518574	0.00270977	15.1218	0.00197031	0.0113006	0.00289375			0.225855	5.22854	0.0379114	0.375165	0.280303	1.57185	0.0610153	0.571213	0.294947
LM-JB-7D-13	Fakos	epithermal	epithermal IS	pyrite	anhedral, cracked	16.0561	521135	7.53798	3.30376	2.75897	1.22713	0.031809	0.603997	0.304141	393.839	0.0391414	0.28558	0.00875971	0.0852642	0.0459808	5.45117	0.0328978	0.0103614	0.14029	0.0307214	2.28164	2807.32	0.218985	24.7845	0.0738569	0.327755	0.00519256	0.279003	0.00407555	52.2473	0.00137456	0.00609988	0.00519256			0.302595	9.41671	0.0553106	0.404601	0.216971	1.22713	0.031809	0.544781	0.304141
LM-JB-7D-14	Fakos	epithermal	epithermal IS	pyrite	subhedral, inclusions	16.7659	494215	0.573944	1.02883	1059.02	1.35781	0.0508209	0.620934	0.271448	136.352	0.139982	0.154562	0.0975182	0.0684063	0.0393309	0.338265	0.027463	0.0101837	1.18247	0.0530067	0.557858	115.311	0.0448269	2.11438	0.0086122	0.0332615	0.243895	0.118381	0.0923552	237.571	0.0177434	0.0685275	0.243895			0.270057	13.5568	0.042238	0.300083	0.273649	1.35781	0.0508209	0.497774	0.271448
LM-JB-7D-15	Fakos	epithermal	epithermal IS	pyrite	subhedral, inclusions	16.8482	521495	1.0809	2.12995	2508.18	2.17019	0.0532435	0.643965	0.222076	94.1127	2.27924	0.506893	1.29482	0.132366	0.0427046	0.740929	0.0353603	0.0132669	161.114	4.61151	0.507475	0.584136	0.0286226	4.86724	8.23446e-05	0.000265058	2.10866	0.0141467	4.26638	87.0692	0.012274	0.0395085	2.10866			0.270093	6.57536	0.0413153	0.466632	0.226392	0.867	0.0532435	0.643965	0.222076
LM-JB-7D-16	Fakos	epithermal	epithermal IS	pyrite	subhedral, inclusions	16.8592	508735	8.36718	12.0851	1683.81	44.6355	0.0461568	0.728054	3.31749	69.7976	25.7244	0.489711	9.18281	0.130212	0.336022	1.4774	1.06535	0.0228793	277.812	12.5236	0.692353	0.251241	0.0450794	2.52215	8.23554e-05	0.00120953	3.07444	0.0925965	1.49675	8.34183	0.00273441	0.0401595	3.07444			0.28784	5.72093	0.0459673	0.601954	0.260699	0.875355	0.0461568	0.728054	0.260246
LM-JB-7D-17	Fakos	epithermal	epithermal IS	pyrite	subhedral, inclusions	22.7575	501049	1.72544	5.27322	61.4669	10.2179	0.0785744	0.548474	4.9259	13.7487	52.8978	0.424469	0.0800434	0.0956544	14.5604	59.7781	0.427644	0.132999	679.944	4.14889	0.327208	0.0202204	0.00610182	0.35028	0.000195604	0.0214142	30.6575	0.0777972	2.40454	7.96825	0.0770814	8.43867	30.6575			0.237706	11.6244	0.0567252	0.301672	0.247014	0.87336	0.0785744	0.548474	0.174082
LM-JB-7D-19	Fakos	epithermal	epithermal IS	pyrite	anhedral, inclusions	16.1896	504190	6.88153	14.7922	8.06466	186.749	0.0838072	0.756082	0.307889	126.409	0.27371	3.27713	8.4941	0.19148	0.0719941	86.2297	0.0592738	0.024129	2.08341	0.711729	0.465213	60.6742	0.341617	22.3507	0.0115815	0.0345559	0.0397746	0.131376	0.103426	18.3693	0.00350635	0.0104619	0.0397746			0.242494	8.20609	0.0502277	0.324322	0.342895	1.06339	0.0789347	0.756082	0.307889
LM-JB-7D-20	Fakos	epithermal	epithermal IS	pyrite	anhedral, inclusions	16.7626	506899	0.0350395	0.362771	17.6733	300.552	0.0598558	0.573513	0.188354	47.3132	1.35485	7.4047	19.8221	0.0943613	0.0495572	6.41034	0.0460349	0.013826	3.78463	1.27082	0.0965885	12.5014	0.335785	0.18603	0.0036532	0.0130943	38.6663	0.357987	36.2683	1350.28	0.394584	1.41432	38.6663			0.321618	7.46951	0.0334382	0.362771	0.36823	1.51954	0.0598558	0.452651	0.188354
LM-JB-7D-23	Fakos	epithermal	epithermal IS	pyrite	subhedral, inclusions	16.6755	531101	27.4078	0.384699	51.7654	1.10465	0.0498258	0.564371	1.46329	70.8629	1.53832	0.266786	0.112386	0.136648	0.0779622	9.80019	0.0224581	0.0191179	5.85972	0.127243	71.2449	12.0932	0.0217149	18.7302	0.0032626	0.0133048	0.056127	0.262524	0.00464259	2.5855	0.000697534	0.00284452	0.056127			0.334088	12.1248	0.0385801	0.384699	0.335942	1.10465	0.0498258	0.564371	0.308845
LM-JB-7D-24	Fakos	epithermal	epithermal IS	pyrite	subhedral, inclusions	15.7698	502147	8.481	0.187204	8.7169	1.23177	0.0351908	0.995467	9.66555	97.8972	0.853714	0.208507	0.0110039	0.135473	0.0886123	15.7907	0.0452077	0.0107676	9.07732	0.0175778	45.3036	10.7848	0.00193645	0.877446	0.00118621	0.00976194	0.100662	0.0940491	0.00207261	11.5431	0.00126961	0.0104483	0.100662			0.260831	8.11322	0.0384475	0.187204	0.294237	1.23177	0.030589	0.995467	0.214123
LM-JB-7D-25	Fakos	epithermal	epithermal IS	pyrite	subhedral, inclusions	17.0505	505580	11.5247	0.312783	12.4199	1.58613	0.0477309	0.829474	5.53578	108.205	0.0185304	0.107005	0.00754103	0.133585	0.0491215	14.4249	0.040099	0.0182317	0.215376	0.00882168	36.8457	502.402	0.0409594	2.08186	0.0846507	0.228073	0.00160789	0.0860376	0.000765459	9.389	0.00158197	0.00426229	0.00160789			0.500863	10.4583	0.027181	0.312783	0.309034	1.58613	0.0477309	0.65084	0.321842
LM-JB-7D-26	Fakos	epithermal	epithermal IS	pyrite	subhedral, inclusions	18.589	497980	1478.7	2.66401	38.8246	1.06738	0.0956747	0.443386	23.2053	62.4049	0.125269	0.108424	0.0090611	0.143702	0.816646	19.8128	0.0299782	0.016474	25.4532	0.451758	555.065	2.45175	0.0177486	63.7223	0.000647227	0.0320842	8.47161e-05	0.00492155	0.000305511	0.0422026	1.11409e-05	0.000552274	8.47161e-05			0.32868	10.7491	0.0594046	0.303674	0.359044	1.06738	0.0956747	0.443386	0.303635
LM-JB-7D-27	Fakos	epithermal	epithermal IS	pyrite	subhedral, inclusions	15.5046	489875	0.0296355	0.352591	30.4685	1.22949	0.055118	0.838579	64.9476	209.228	0.0466158	0.206292	0.0166221	0.0775157	0.0506337	5.23604	0.0449941	0.0184499	2.34742	0.132828	0.0840506	89.131	0.0565848	0.000456298	0.00785968	0.02157	1.57297	0.0198583	4.48206	7060.04	0.622562	1.70855	1.57297			0.212342	7.52012	0.0296355	0.352591	0.321125	1.22949	0.055118	0.585975	0.253251
LM-JB-7D-28	Fakos	epithermal	epithermal IS	pyrite	subhedral, inclusions	16.7067	508115	232.852	0.684003	57.2776	3.53067	0.0549499	0.396425	51.7155	186.5	0.1334	0.222498	0.382466	0.143901	0.0715164	9.37374	0.0305812	0.0168569	5.18391	0.0325418	340.426	35.9766	0.00627746	4.50257	0.00325177	0.0137958	0.000572895	0.0257334	0.000139753	0.800936	7.23931e-05	0.000307132	0.000572895			0.160844	8.66477	0.0297073	0.45413	0.171686	1.07634	0.0549499	0.396425	0.33959
LM-JB-7D-29	Fakos	epithermal	epithermal IS	pyrite	subhedral, inclusions	16.3026	494072	188.936	5.29443	606.199	29.2584	0.0908714	0.593853	98.0738	71.6663	0.526209	1.68611	10.4137	0.280714	0.429215	9.16936	0.07433	0.0097725	78.5734	0.923394	35.6858	0.912094	0.011752	1.92647	0.000124374	0.0054626	0.00278512	0.00669704	0.00488734	0.379315	5.17239e-05	0.00227175	0.00278512			0.239338	10.1876	0.0461849	0.211035	0.239885	2.30144	0.0540141	0.457417	0.290347
LM-JB-7D-30	Fakos	epithermal	epithermal IS	pyrite	subhedral, inclusions	16.3006	510629	0.908463	0.242192	2.34179	0.988217	0.0379026	0.659103	1.38649	83.7317	0.0388865	0.158374	0.00512105	0.0925781	0.0596794	0.206803	0.0425779	0.0169337	0.264927	0.0171354	3.751	316.056	0.0646796	0.655225	0.0639183	0.225267	0.0428047	0.146782	0.0188619	92.1686	0.0186399	0.0656927	0.0428047			0.280759	9.03962	0.0397242	0.242192	0.258308	0.988217	0.0379026	0.659103	0.214145
LM33a_I_py3	Fakos	epithermal	epithermal IS	pyrite	0	n.a.	431579	61.2942	388.67	20.3307	3.10006	n.a.	n.a.	1511.99	13.2977	13.4275	0.0897362	n.a.	n.a.	4.62575	49.7651	1.14153	0.0472069	84.973	1.39368	0.157702	0.156493	0.0164014	0.0405387	0.000555551	0.0544379	0.219067	0.158021	0.0227375	0.216948	0.000770169	0.0754681	0.219067			n.a.	16.608	0.0373539	0.305225	0.460472	3.10006	n.a.	n.a.	0.385017
LM33a_I_py1	Fakos	epithermal	epithermal IS	pyrite	0	n.a.	410933	116.794	543.816	4.49945	10.3405	n.a.	n.a.	66.7544	4.35939	0.526549	0.201974	n.a.	n.a.	1.80345	7.20585	0.105969	0.0170486	20.1226	0.15997	0.214768	0.216641	0.00794977	1.74961	0.000847236	0.0896229	0.00450834	0.026167	0.00136968	0.0373253	0.000145971	0.0154412	0.00450834			n.a.	16.6229	0.0394962	0.250388	0.337407	2.30805	n.a.	n.a.	0.326938
LM33a_II_py1	Fakos	epithermal	epithermal IS	pyrite	0	n.a.	423817	114.292	274.697	6.88046	6.02032	n.a.	n.a.	703.709	29.5476	1.26008	0.0915452	n.a.	n.a.	3.56365	23.2925	1.35911	0.0625243	43.9161	1.29695	0.416064	0.672818	0.0295323	0.162413	0.00142372	0.0811467	0.0110251	0.0286928	0.0113477	0.258528	0.000547059	0.0311804	0.0110251			n.a.	15.3892	0.0365869	0.251548	0.406403	2.47906	n.a.	n.a.	0.196488
LM33a_III_py1	Fakos	epithermal	epithermal IS	pyrite	0	n.a.	395206	8.01197	329.181	2275.25	62.6075	n.a.	n.a.	2.30311	5.14492	7.51318	1.22574	n.a.	n.a.	3.91955	0.719318	0.0268288	0.0201995	18.2219	0.0239654	0.0243391	0.282347	0.0013152	3.47877	0.00110853	0.2151	0.937744	0.412315	0.0029912	0.642153	0.00252116	0.489211	0.937744			n.a.	19.4934	0.03036	0.207747	0.462363	5.43736	n.a.	n.a.	0.253969
LM33a_III_py3	Fakos	epithermal	epithermal IS	pyrite	0	n.a.	422151	0.0300305	7.05561	579.03	225.726	n.a.	n.a.	3.12767	3.58328	7.59083	4.30022	n.a.	n.a.	30.83	4.51414	0.158425	0.275312	64.12	0.0105211	0.00425626	0.0558839	0.000164085	0.00960156	0.00429369	0.480817	252.771	0.118385	0.350348	119.321	9.16774	1026.62	252.771			n.a.	16.4325	0.0300305	0.208342	0.516911	2.00024	n.a.	n.a.	0.299528
LM33a_XIII_py1	Fakos	epithermal	epithermal IS	pyrite	0	n.a.	370165	13.3021	721.463	188.598	33.1988	n.a.	n.a.	351.99	4.49794	62.6907	0.922692	n.a.	n.a.	112.65	12.9695	0.891806	3.89228	308.404	0.0133341	0.0184377	0.0145846	4.32359e-05	0.0377913	0.0126207	0.365268	4.71283	0.203274	0.0010024	0.338136	0.292605	8.46857	4.71283			n.a.	19.7917	0.0374695	0.465805	0.655187	2.98348	n.a.	n.a.	0.513602
LM33a_VIII_py1	Fakos	epithermal	epithermal IS	pyrite	0	n.a.	382441	0.0587199	3.40093	16.577	1480.39	n.a.	n.a.	0.258102	2.34586	3.37438	10.8381	n.a.	n.a.	1.2044	1.06373	0.115042	0.0071589	20.6065	0.0076038	0.0172658	0.113841	0.000369	0.227507	0.000347409	0.0584472	57.4657	0.163753	0.129493	39.95	0.121916	20.5109	57.4657			n.a.	14.6575	0.0431605	0.253503	0.52005	2.33355	n.a.	n.a.	0.258102
LM33b_III_py6	Fakos	epithermal	epithermal IS	pyrite	0	n.a.	419026	188.856	228.08	22.3712	4.42816	n.a.	n.a.	262.807	5.94272	0.345695	0.12275	n.a.	n.a.	0.205829	1.77283	0.790566	0.017981	27.4222	3.45637	0.828027	0.216712	0.126043	0.718612	0.000655712	0.00750595	0.00183047	0.0126064	0.0183016	0.0314669	9.52102e-05	0.00108987	0.00183047			n.a.	8.58377	0.0358108	0.211937	0.538624	4.22916	n.a.	n.a.	0.253259
LM33b_X_py1	Fakos	epithermal	epithermal IS	pyrite	0	n.a.	417083	0.103693	1.68606	67.2355	483.813	n.a.	n.a.	0.236336	3.27751	1.69522	2.3562	n.a.	n.a.	0.0926819	1.20201	0.115565	0.00842076	11.1331	0.00974893	0.0615	0.294394	0.000875673	0.43875	0.000756373	0.00832492	16.3485	0.152269	0.0940177	31.608	0.0812089	0.893815	16.3485			n.a.	13.9184	0.0340594	0.229479	0.534695	4.61298	n.a.	n.a.	0.236336
LM33b_X_py3 (61)	Fakos	epithermal	epithermal IS	pyrite	0	n.a.	492940	26.9117	600.138	5437.15	1372.3	n.a.	n.a.	218.324	5.8055	2536.88	3.97339	n.a.	n.a.	6.04358	1403.95	373.096	0.0292998	39.2142	0.0178345	0.0448425	0.148046	0.000454797	0.123265	0.000747174	0.154117	94.2667	64.6929	0.000662703	0.215724	0.00108874	0.224571	94.2667			n.a.	55.294	0.0656144	1.29706	1.78459	11.7477	n.a.	n.a.	0.587479
LM33b_III_py9 (170)	Fakos	epithermal	epithermal IS	pyrite	0	n.a.	422534	43.0964	415.523	619.324	912.406	n.a.	n.a.	20.6934	6.03453	1236.05	11.1015	n.a.	n.a.	11.4961	1630.26	219.135	0.0284052	182.719	0.0443988	0.103716	0.0330263	0.00024299	2.08261	0.000155458	0.0629169	28.6811	6.76477	0.00103022	0.140024	0.000659108	0.266753	28.6811			n.a.	13.5189	0.0288933	0.415593	0.581365	4.06986	n.a.	n.a.	0.301699
LM33b_III_py5	Fakos	epithermal	epithermal IS	pyrite	0	n.a.	450672	1.51883	8.64878	23.3892	601.149	n.a.	n.a.	4.16739	3.67765	14.4531	4.91046	n.a.	n.a.	1.25239	52.2379	0.144813	0.0159123	82.7354	0.0401718	0.175612	0.0444508	0.000485545	0.364455	0.000192327	0.0151373	9.51599	0.174691	0.0264492	2.42137	0.0104767	0.824577	9.51599			n.a.	13.3812	0.0524535	0.255277	0.743092	3.16581	n.a.	n.a.	0.377309
LM33b_III_py4	Fakos	epithermal	epithermal IS	pyrite	0	n.a.	421515	0.394717	43.684	33.9009	71.2611	n.a.	n.a.	0.354425	5.1636	0.971166	3.22741	n.a.	n.a.	0.137074	71.4461	0.0338022	0.0147784	0.751197	0.00939033	0.00903574	6.87383	0.0125005	1.11368	0.0196731	0.182474	2.46041	1.29283	0.02379	13.0818	0.0374404	0.347272	2.46041			n.a.	14.4682	0.0342033	0.194296	0.437184	3.02703	n.a.	n.a.	0.354425
LM33b_III_py2	Fakos	epithermal	epithermal IS	pyrite	0	n.a.	378958	1.74622	10.6548	17.7398	530.494	n.a.	n.a.	0.268611	2.75669	1.12869	2.58371	n.a.	n.a.	0.179185	1.03002	0.058149	0.00969747	5.1724	0.00743482	0.16389	0.532962	0.0014374	6.50092	0.00187485	0.0346425	0.646364	0.218214	0.00425767	1.57866	0.00555342	0.102613	0.646364			n.a.	13.6783	0.0449843	0.25139	0.601948	3.40178	n.a.	n.a.	0.248569
LM33b_II_py2	Fakos	epithermal	epithermal IS	pyrite	0	n.a.	418514	3.8851	210.871	40951.2	155.109	n.a.	n.a.	129.578	4.02343	125.115	2.62814	n.a.	n.a.	39.7233	49.7166	0.462683	0.888681	969.815	0.17273	0.0184241	0.00414866	0.000178106	0.0299826	0.00091634	0.0409597	32.2039	0.129009	0.0444596	1.03561	0.228741	10.2245	32.2039			n.a.	48.4526	0.0846343	0.701387	1.29418	7.75379	n.a.	n.a.	0.923573
LM33b_IV_py10	Fakos	epithermal	epithermal IS	pyrite	0	n.a.	436712	23.8862	269.728	92.3409	110.9	n.a.	n.a.	22.2294	17.0535	104.298	0.382916	n.a.	n.a.	16.1231	90.6638	0.902691	0.525558	7818	2.13621	0.0885563	0.00218131	0.000273243	1.07453	6.72241e-05	0.00206231	4.36645	0.0133407	0.0894331	0.713947	0.0220026	0.674998	4.36645			n.a.	15.9811	0.0330602	0.334295	0.623822	3.25271	n.a.	n.a.	0.218433
LM33b_IV_py8	Fakos	epithermal	epithermal IS	pyrite	0	n.a.	414506	0.153755	0.624475	88.6564	407.504	n.a.	n.a.	0.445055	4.92489	1.57133	2.39104	n.a.	n.a.	0.17826	0.509886	0.0754723	0.00929775	9.77591	0.00969658	0.246215	0.503778	0.000991885	0.345474	0.000951088	0.0182346	10.2197	0.160735	0.063065	32.0307	0.0604711	1.15938	10.2197			n.a.	13.537	0.0438619	0.229891	0.760751	3.19323	n.a.	n.a.	0.229445
LM33b_IV_py4	Fakos	epithermal	epithermal IS	pyrite	0	n.a.	430408	4.20228	1820.89	116.458	3.24742	n.a.	n.a.	2164.53	6.71763	1.90252	0.128106	n.a.	n.a.	21.3278	13.086	2.35093	0.0592654	1234.69	0.262346	0.00230782	0.00544074	0.000212479	0.00194143	4.80003e-05	0.0172738	0.452736	0.00154089	0.0624295	1.59857	0.0141032	5.07531	0.452736			n.a.	13.9932	0.0298493	0.128818	0.428783	3.24742	n.a.	n.a.	0.156664
LM33b_XI_py5 (154)	Fakos	epithermal	epithermal IS	pyrite	0	n.a.	413649	26.8455	905.713	170.831	480.43	n.a.	n.a.	50.2004	6.15408	1085.75	2.29545	n.a.	n.a.	8.34018	857.869	71.2433	0.0169818	65.0493	0.016847	0.0296401	0.0946064	0.000258988	0.534765	0.00026106	0.128213	40.4444	16.6912	0.000627554	0.229241	0.000632575	0.310674	40.4444			n.a.	15.3276	0.0339274	0.278985	0.527522	3.21092	n.a.	n.a.	0.264598
LM33b_XI_py1 (150)	Fakos	epithermal	epithermal IS	pyrite	0	n.a.	431455	15.9343	264.239	243.447	8.34724	n.a.	n.a.	11.0646	5.56379	517.966	0.148376	n.a.	n.a.	2.036	576.044	36.8152	0.0273142	367.491	0.0946646	0.0603028	0.0151399	0.000257597	1.44012	7.43261e-05	0.00554027	32.5063	1.40946	0.00594092	0.34917	0.00171417	0.127774	32.5063			n.a.	16.9575	0.0387823	0.192004	0.639084	3.37758	n.a.	n.a.	0.295176
LM64_I_py7	Fakos	porphyry	sercicitic	pyrite	0	n.a.	464335	9.89023	168.237	26.6747	6.2637	n.a.	n.a.	1.57531	134.602	10.072	0.411169	n.a.	n.a.	0.857881	11.8656	1.63171	0.0419805	44.2881	2.70419	0.0587876	3.03925	0.0610592	6.27826	0.000947897	0.0193705	1.01838	0.22742	0.273421	13.6096	0.00424464	0.0867402	1.01838			n.a.	40.056	0.0586233	0.541892	0.785922	6.2637	n.a.	n.a.	0.457151
LM64_I_py8	Fakos	porphyry	sercicitic	pyrite	0	n.a.	454129	21.7447	122.124	5.85716	3.58619	n.a.	n.a.	2.63816	94.3649	3.59956	0.186186	n.a.	n.a.	0.751872	2.90849	0.361917	0.0161309	3.01826	0.212062	0.178054	31.2647	0.0702596	8.24238	0.00534443	0.249108	0.165537	1.19259	0.00975233	4.33967	0.000741829	0.0345772	0.165537			n.a.	40.2394	0.0668619	0.474939	0.527356	3.58619	n.a.	n.a.	0.355345
LM64_II_py7	Fakos	porphyry	sercicitic	pyrite	0	n.a.	469155	60.8115	442.468	2.90157	4.44752	n.a.	n.a.	5.09	66.6489	0.057785	0.168647	n.a.	n.a.	0.330723	6.25926	0.0223796	0.0116104	0.669133	0.491774	0.137437	99.6048	0.734942	11.9473	0.0173515	0.494256	0.000950232	0.086358	0.00808687	1.09599	0.000190925	0.0054385	0.000950232			n.a.	21.632	0.0525071	0.326894	0.575626	4.44752	n.a.	n.a.	0.278344
LM64_II_py6	Fakos	porphyry	sercicitic	pyrite	0	n.a.	495110	47.4193	201.726	1909.21	3.9816	n.a.	n.a.	2663.88	38.796	0.8779	0.229217	n.a.	n.a.	15.8526	43.8247	0.534965	0.0894072	68.0857	19.5819	0.235067	0.569811	0.287606	0.0178008	0.00131316	0.232833	0.0185136	0.012894	0.412952	0.818149	0.00188546	0.334307	0.0185136			n.a.	19.8953	0.0324672	0.288155	0.672952	3.9816	n.a.	n.a.	0.289646
LM64_II_py2.3	Fakos	porphyry	sercicitic	pyrite	0	n.a.	462390	16.3317	111.523	4.14906	5.08123	n.a.	n.a.	0.676478	48.0654	2.00322	0.2662	n.a.	n.a.	0.177743	25.3735	1.13208	0.0346736	4.30628	4.94959	0.146443	11.1617	1.14939	24.1423	0.00805186	0.0412753	0.122658	0.465186	0.303065	2.94307	0.00212308	0.0108833	0.122658			n.a.	28.3514	0.0439042	0.445473	0.682152	5.08123	n.a.	n.a.	0.345664
LM64_II_py2.2	Fakos	porphyry	sercicitic	pyrite	0	n.a.	474418	188.7	555.19	15.0295	3.88573	n.a.	n.a.	10.0968	50.1984	0.465761	0.239047	n.a.	n.a.	1.35932	55.5887	0.70267	0.126879	62.8799	6.06098	0.339883	0.798322	0.0963897	18.689	0.00201779	0.0216177	0.00246827	0.00740715	0.0321197	0.266023	0.000672384	0.00720362	0.00246827			n.a.	21.7297	0.0735296	0.336724	0.75168	3.88573	n.a.	n.a.	0.288666
LM64_II_py2.1	Fakos	porphyry	sercicitic	pyrite	0	n.a.	506618	192.586	713.469	15.5645	3.08022	n.a.	n.a.	13.9671	82.8357	0.898808	0.336795	n.a.	n.a.	1.26808	29.5994	0.212964	0.0258809	29.1079	0.398206	0.26993	2.84581	0.0136803	13.7885	0.000889137	0.0435647	0.00466704	0.0308784	0.00206768	0.430122	0.000134386	0.00658446	0.00466704			n.a.	26.839	0.0359838	0.265161	0.743391	3.08022	n.a.	n.a.	0.180838
LM64_III_py4	Fakos	porphyry	sercicitic	pyrite	0	n.a.	413648	157.547	412.46	8.65714	5.18288	n.a.	n.a.	9.09159	103.72	0.42646	0.217569	n.a.	n.a.	2.9188	47.5918	0.285852	0.0262218	9.39655	7.22312	0.381968	11.0381	0.768699	17.3288	0.00279058	0.310625	0.00270688	0.0453847	0.0458475	0.658342	0.000166439	0.0185266	0.00270688			n.a.	17.4905	0.0565795	0.283668	0.601053	5.18288	n.a.	n.a.	0.36728
LM64_III_py5	Fakos	porphyry	sercicitic	pyrite	0	n.a.	547134	238.733	603.413	6.00551	4.56089	n.a.	n.a.	7.22985	88.956	10.5622	0.294227	n.a.	n.a.	0.28049	12.8029	0.397931	0.0219933	5.23636	0.241681	0.395638	16.9881	0.0461544	33.0205	0.00420012	0.0535658	0.0442427	2.01709	0.00101235	0.372617	9.21252e-05	0.00117491	0.0442427			n.a.	39.6184	0.0795382	0.497813	1.02449	4.56089	n.a.	n.a.	0.601082
LM64_V_py_2	Fakos	porphyry	sercicitic	pyrite	0	n.a.	504860	1.59344	31.4637	2.76671	3.184	n.a.	n.a.	1.95186	156.412	0.0322234	0.145474	n.a.	n.a.	0.0920832	4.33358	0.0220984	0.0167324	0.691363	0.466961	0.0506437	226.237	0.675421	0.81637	0.024202	0.133191	0.0202226	0.0466085	0.293053	98.1602	0.0105008	0.057789	0.0202226			n.a.	19.4891	0.0274566	0.55602	0.705629	3.184	n.a.	n.a.	0.251652
LM64_V_py_9	Fakos	porphyry	sercicitic	pyrite	0	n.a.	447101	53.7158	518.766	5.05417	4.43057	n.a.	n.a.	1.58429	103.95	0.0362608	0.285718	n.a.	n.a.	0.0787278	2.72526	0.0328598	0.0131096	1.74672	0.226473	0.103545	59.5115	0.129656	33.9052	0.00750526	0.0450718	0.00067505	0.0207594	0.00421614	1.93518	0.000244054	0.00146564	0.00067505			n.a.	25.8271	0.0458048	0.269845	0.853309	4.43057	n.a.	n.a.	0.275213
LM64_V_py_6	Fakos	porphyry	sercicitic	pyrite	0	n.a.	462961	94.8712	721.481	1.60948	2.78946	n.a.	n.a.	2.93288	186.558	0.150701	0.108041	n.a.	n.a.	0.511674	3.91659	0.0285826	0.0164398	0.714037	0.272306	0.131495	261.272	0.381361	32.3475	0.0230237	0.716593	0.00158848	0.211054	0.00287027	1.96644	0.000173285	0.00539336	0.00158848			n.a.	23.5607	0.0424915	0.381641	0.646358	2.78946	n.a.	n.a.	0.258208
LM64_V_py_3	Fakos	porphyry	sercicitic	pyrite	0	n.a.	564193	6.60105	169.561	3.23433	5.50263	n.a.	n.a.	3.14359	250.434	1.02982	0.149394	n.a.	n.a.	0.640084	9.85976	0.0999766	0.0230276	475.193	2.50178	0.0389302	0.527016	0.00526477	2.09984	4.84594e-05	0.001347	0.156008	0.00216716	0.378998	37.9385	0.00348847	0.096967	0.156008			n.a.	37.1203	0.0625632	0.441092	1.05881	5.44413	n.a.	n.a.	0.189457
LM64_VI_py6	Fakos	porphyry	sercicitic	pyrite	0	n.a.	482849	137.713	918.509	4.50244	4.13012	n.a.	n.a.	3.24402	60.043	0.10421	0.34781	n.a.	n.a.	0.0787774	8.32255	0.0357353	0.015278	10.1197	0.876392	0.149931	5.93328	0.0866025	42.4514	0.00150973	0.00778455	0.000756719	0.0102977	0.00636389	0.436001	0.000110941	0.000572039	0.000756719			n.a.	33.84	0.0372318	0.416025	1.08001	4.13012	n.a.	n.a.	0.550606
LM64_VI_py5	Fakos	porphyry	sercicitic	pyrite	0	n.a.	528138	59.2429	149.395	9.53361	5.79789	n.a.	n.a.	10.1616	272.641	0.3352	0.188297	n.a.	n.a.	1.81225	14.7384	0.493389	0.0213946	18.2353	2.37598	0.396551	14.9513	0.130296	5.8301	0.00117325	0.0993817	0.00565806	0.018382	0.0401058	4.60209	0.000361134	0.0305902	0.00565806			n.a.	31.7535	0.0595255	0.404208	0.619386	5.79789	n.a.	n.a.	0.310137
LM64_VI_py4	Fakos	porphyry	sercicitic	pyrite	0	n.a.	581810	217.548	293.34	41.8705	5.77814	n.a.	n.a.	40.5753	202.02	1.3774	0.132897	n.a.	n.a.	7.4432	45.191	1.5514	0.058417	45.5318	1.37023	0.741627	4.4369	0.0300939	5.36159	0.00128299	0.163473	0.00633146	0.0302513	0.00629851	0.928622	0.000268524	0.034214	0.00633146			n.a.	34.6799	0.0541779	0.466097	0.870156	5.77814	n.a.	n.a.	0.304943
LM64_VII_py1	Fakos	porphyry	sercicitic	pyrite	0	n.a.	447863	43.568	290.067	0.865085	5.95267	n.a.	n.a.	8.4067	141.487	0.036803	0.0954902	n.a.	n.a.	0.103269	0.391376	0.0149684	0.0141132	0.158048	0.0121301	0.1502	895.22	0.0767497	5.18253	0.089297	0.653403	0.000844725	0.23286	0.000278418	3.24751	0.000323935	0.00237029	0.000844725			n.a.	32.3538	0.0523601	0.406929	0.470907	5.95267	n.a.	n.a.	0.361125
LM64_VII_py5	Fakos	porphyry	sercicitic	pyrite	0	n.a.	466311	7.18194	115.336	0.824387	4.3216	n.a.	n.a.	7.57375	176.683	0.0666324	0.175717	n.a.	n.a.	0.155102	1.24857	0.862802	0.0149865	2.2016	0.701597	0.0622696	80.2519	0.318676	0.948267	0.00680711	0.0704498	0.00927778	0.0302655	0.0976891	24.601	0.0020867	0.0215962	0.00927778			n.a.	23.444	0.0584124	0.419534	0.73136	4.3216	n.a.	n.a.	0.293915
LM64_VII_py7	Fakos	porphyry	sercicitic	pyrite	0	n.a.	522908	332.913	396.056	4.73512	3.6125	n.a.	n.a.	85.0329	127.576	0.289509	0.182979	n.a.	n.a.	0.836951	35.7115	0.181827	0.0594731	30.5321	0.39051	0.840571	4.17842	0.0127902	3.91511	0.00194789	0.0274122	0.000869625	0.00948213	0.00117301	0.383211	0.000178645	0.00251403	0.000869625			n.a.	25.0448	0.0378817	0.460774	0.592928	3.6125	n.a.	n.a.	0.284094
LM64_VIII_py5	Fakos	porphyry	sercicitic	pyrite	0	n.a.	518187	51.7246	120.103	3.78793	3.97069	n.a.	n.a.	4.55823	125.023	0.112384	0.196013	n.a.	n.a.	0.739209	12.1058	0.111165	0.0105387	12.968	1.44456	0.430668	9.64088	0.111395	11.3475	0.000812675	0.0570027	0.00217274	0.00866628	0.027928	2.41708	0.000203747	0.0142913	0.00217274			n.a.	15.8783	0.0461011	0.484728	0.521001	3.97069	n.a.	n.a.	0.346977
LM64_VIII_py6	Fakos	porphyry	sercicitic	pyrite	0	n.a.	477736	260.561	874.929	34.4329	2.56387	n.a.	n.a.	7.27252	114.566	0.309591	0.102286	n.a.	n.a.	0.464441	70.9209	0.393853	0.0682869	27.0886	11.6701	0.297808	4.22931	0.43081	35.8282	0.00252087	0.0171453	0.00118817	0.0114288	0.0447881	0.439689	0.000262076	0.00178247	0.00118817			n.a.	19.258	0.0451586	0.419234	0.535459	2.56387	n.a.	n.a.	0.160359
LM64_VIII_py3	Fakos	porphyry	sercicitic	pyrite	0	n.a.	500624	99.8626	292.527	4.07749	4.21926	n.a.	n.a.	10.2885	163.877	0.801523	0.276007	n.a.	n.a.	1.57289	5.39113	0.170746	0.0224776	3.36681	0.278486	0.341379	48.6742	0.0827153	9.70625	0.00667624	0.467176	0.00802625	0.238066	0.0027887	1.64102	0.000225085	0.0157506	0.00802625			n.a.	13.1663	0.0398801	0.180437	1.31065	4.21926	n.a.	n.a.	0.652488
LM64_VIII_py2	Fakos	porphyry	sercicitic	pyrite	0	n.a.	467761	27.7511	174.179	5.52585	143.81	n.a.	n.a.	7.66771	92.6807	0.292535	0.21039	n.a.	n.a.	0.315022	13.5902	0.641973	0.0116393	7.11661	1.23305	0.159325	13.0232	0.173264	3.61921	0.00163551	0.0442657	0.0105414	0.0411059	0.0444325	3.33972	0.000419417	0.0113517	0.0105414			n.a.	34.2601	0.0730168	0.529241	0.884715	5.68642	n.a.	n.a.	0.383437
LM64_IX_py1.3	Fakos	porphyry	sercicitic	pyrite	0	n.a.	434376	17.0198	69.3701	5.09552	7.92524	n.a.	n.a.	2.77782	164.472	0.0593863	0.225132	n.a.	n.a.	0.195073	1.8201	0.0224841	0.00681608	4.84517	0.0104956	0.245348	33.9457	0.0021662	6.12704	0.00140678	0.0402614	0.00348925	0.0122568	0.000616668	9.66359	0.000400479	0.0114615	0.00348925			n.a.	24.5451	0.0502939	0.412408	0.616677	7.92524	n.a.	n.a.	0.267903
LM64_IX_py1.4	Fakos	porphyry	sercicitic	pyrite	0	n.a.	466825	32.606	142.619	1.8355	2.75603	n.a.	n.a.	2.86329	440.194	0.0438277	0.315625	n.a.	n.a.	0.0894717	1.67757	0.0359128	0.0120245	0.492783	0.0174225	0.228623	893.282	0.0353553	11.3876	0.0244012	0.181564	0.00134416	0.0889392	0.000534334	13.5004	0.000368781	0.00274403	0.00134416			n.a.	38.5265	0.0414967	0.471896	1.18032	2.75603	n.a.	n.a.	0.268337
LM64_IX_py1.4	Fakos	porphyry	sercicitic	pyrite	0	n.a.	474880	76.4332	681.052	306.983	3.65262	n.a.	n.a.	15.587	475.623	0.0509643	0.15123	n.a.	n.a.	0.318842	5.5521	0.0286609	0.0187637	5.70401	0.228133	0.112228	83.3839	0.0399952	4.90364	0.00328957	0.0558978	0.000666783	0.00893482	0.00298474	6.22272	0.000245492	0.0041715	0.000666783			n.a.	17.7994	0.0510971	0.279928	0.753792	3.65262	n.a.	n.a.	0.27725
LM64_X_py1	Fakos	porphyry	sercicitic	pyrite	0	n.a.	474007	108.602	279.195	1.02986	5.44466	n.a.	n.a.	1.35443	173.18	0.0427408	0.164077	n.a.	n.a.	0.205888	3.81195	0.0201828	0.0113894	0.789364	0.140917	0.388982	219.392	0.17852	80.1826	0.0144286	0.260828	0.000393556	0.054146	0.00129756	1.59464	0.000104873	0.00189581	0.000393556			n.a.	24.6532	0.0533666	0.393142	1.01044	5.44466	n.a.	n.a.	0.289072
LM64_X_py6	Fakos	porphyry	sercicitic	pyrite	0	n.a.	507164	120.475	317.048	5.81776	3.69231	n.a.	n.a.	6.90318	175.028	0.236808	0.186735	n.a.	n.a.	1.41528	24.6387	0.21214	0.0147827	8.6549	0.672822	0.37999	20.223	0.0777388	17.4521	0.00170801	0.163524	0.00196562	0.0273612	0.00558474	1.45282	0.000122703	0.0117475	0.00196562			n.a.	33.3838	0.0394615	0.357036	0.58936	3.69231	n.a.	n.a.	0.358814
LM64_XII_py1	Fakos	porphyry	sercicitic	pyrite	0	n.a.	459699	40.4528	214.034	6.54645	4.16528	n.a.	n.a.	8.30195	265.197	1.11197	0.175544	n.a.	n.a.	0.155928	17.9388	0.520921	0.016638	3.65286	1.09573	0.189001	72.6	0.299964	4.87268	0.00455479	0.0426867	0.027488	0.30441	0.0270866	6.55573	0.000411294	0.00385458	0.027488			n.a.	17.9117	0.0504184	0.28	0.616584	4.16528	n.a.	n.a.	0.18881
LM64_XII_py3	Fakos	porphyry	sercicitic	pyrite	0	n.a.	511028	59.4257	216.19	11.4494	8.58957	n.a.	n.a.	10.4796	233.962	2.00881	0.403591	n.a.	n.a.	2.77554	25.2615	0.350947	0.0269826	28.2356	3.07227	0.274877	8.28607	0.108808	5.67058	0.000955624	0.0982995	0.0338038	0.0711448	0.0516993	3.93705	0.000454056	0.0467061	0.0338038			n.a.	31.1654	0.0766448	0.413827	1.19708	8.58957	n.a.	n.a.	0.571029
LEM 89-1.d	Fakos	epithermal	epithermal IS	pyrite	euhedral	338.672	576576	151.458	241.876	19.7848	122.034	0.432705	1.50425	837.56	6.9786	6.68751	3.19411	0.0181294	0.158879	12.4844	23.9091	4.41313	0.151816	868.382	0.0118753	0.626182	0.00803632	1.36752e-05	0.180833	0.000174826	0.0143767	0.0441542	0.00770112	7.84065e-05	0.0460761	0.00100236	0.0824284	0.0441542	0	0	0.447955	15.0734	0.0221477	0.208792	0.242341	3.68337	0.0781453	0.671208	0.659591
LEM 89-2.d	Fakos	epithermal	epithermal IS	pyrite	anhedral	22.5926	445881	490.236	1.06267	0.560367	3.18306	0.028951	0.907996	98.4178	46.75	0.0132869	0.104811	0.0057466	0.119264	0.0184233	7.81767	0.0150887	0.00556044	1.4799	0.993717	461.326	31.59	0.671478	4.98117	0.00375732	0.0124491	2.71031e-05	0.00897827	0.00202702	0.0953622	1.13424e-05	3.75806e-05	2.71031e-05	0	0	0.139548	6.11628	0.014256	0.164699	0.0830891	3.18306	0.028951	0.24931	0.269825
LEM 89-3.d	Fakos	epithermal	epithermal IS	pyrite	subhedral	19.1374	393300	5258.16	74.409	0.490176	2.7113	0.0423226	0.789518	259.627	38.8258	0.0479094	0.143919	0.00867511	0.130106	0.0417118	3.58756	0.038154	0.0082174	9.28368	1.80666	70.6657	4.18215	0.194606	20.2527	0.000885145	0.00449302	9.11144e-06	0.00516061	0.000343591	0.00738391	1.56279e-06	7.93277e-06	9.11144e-06	0	0	0.287618	7.97534	0.017095	0.215184	0.142498	2.7113	0.0423226	0.312801	0.456036
LEM 89-4.d	Fakos	epithermal	epithermal IS	pyrite	subhedral	80.7886	470972	29.4996	480.681	156.838	21.6804	0.198525	0.600208	130.666	32.8679	3.45313	0.235568	0.00876343	0.158407	1.15379	7.91091	0.553999	0.0176448	19.1027	1.49291	0.0613705	1.72059	0.0781516	0.225763	0.00092368	0.0603992	0.117057	0.180767	0.0506076	1.11418	0.000598135	0.0391119	0.117057	0	0	0.144327	6.7026	0.0382611	0.176825	0.124091	3.174	0.0328856	0.479103	0.320074
LEM 89-6.d	Fakos	epithermal	epithermal IS	pyrite	euhedral	22.4652	467452	142.868	101.688	3.00304	3.09826	0.391701	0.95832	111.554	26.9799	2.85058	0.0581091	0.0034003	0.130754	0.786295	2.5215	0.32476	0.00841323	5.37152	0.915835	1.40497	5.02276	0.170498	1.28072	0.00156627	0.146382	0.0199525	0.530683	0.00641034	0.188844	5.8888e-05	0.00550364	0.0199525	0	0	0.15318	9.16634	0.0296651	0.203455	0.177566	3.09826	0.0260341	0.158766	0.268407
LEM 89-7.d	Fakos	epithermal	epithermal IS	pyrite	anhedral	52.5471	437952	41.33	237.215	20.6568	75.6579	0.224132	0.612982	142.032	31.1012	0.342491	2.20404	0.00421094	0.115124	0.789172	0.711934	0.156578	0.0255897	319.889	1.32744	0.17423	0.0972251	0.00414968	0.290991	7.99956e-05	0.00246702	0.00828676	0.00107066	0.032118	0.75251	0.000619156	0.0190944	0.00828676	0	0	0.15531	7.68899	0.0187322	0.222463	0.187079	2.21266	0.0274064	0.49352	0.244328
LEM 89-10.d	Fakos	epithermal	epithermal IS	pyrite	subhedral	134.866	434296	1282.05	192.001	39.5163	7.31109	0.506622	0.57253	207.109	28.105	0.228107	0.266002	0.00386994	0.104025	2.50462	6.6042	0.194059	0.0709172	143.815	2.98601	6.67731	0.195425	0.0207629	6.19024	0.000493115	0.0174156	0.000177923	0.00158612	0.00232909	0.0219218	5.53153e-05	0.0019536	0.000177923	0	0	0.20987	5.33924	0.0153251	0.196477	0.22167	1.58215	0.0271285	0.57253	0.316243
LEM 89-11.d	Fakos	epithermal	epithermal IS	pyrite	subhedral	287.182	444257	45.122	97.4642	220.906	11.178	5.71153	0.805579	84.2841	8.48875	19.5592	0.157432	0.0146945	0.125182	8.65988	33.6603	1.42341	0.22564	92.3772	0.819714	0.46296	0.0918922	0.00887355	0.535356	0.00244259	0.0937448	0.433475	0.211732	0.0181666	0.188129	0.00500066	0.191922	0.433475	0	0	0.250996	6.38558	0.0183288	0.23499	0.264926	1.89193	0.0324447	0.684782	0.378193
LEM 89-12.d	Fakos	epithermal	epithermal IS	pyrite	anhedral, cracked	20.8588	437863	2.3349	140.259	0.287186	2.65499	0.0268482	0.372064	5.58291	45.8186	0.0147324	0.092724	7.8188e-05	0.0877679	0.0183331	0.609772	0.0109752	0.0060024	3.0567	1.46372	0.016647	14.9895	0.478855	0.418223	0.00196368	0.00599766	0.00630966	0.00481971	0.626887	19.6234	0.00257073	0.00785176	0.00630966	0	0	0.133942	5.63015	0.0156759	0.174528	0.163258	2.65499	0.0268482	0.372064	0.201356
LEM 89-13.d	Fakos	epithermal	epithermal IS	pyrite	anhedral, cracked	39.1367	431788	5.82426	48.8083	0.17226	3.84628	0.0471212	0.364511	3.33082	44.2806	0.0153082	0.0978373	0.00529124	0.11264	0.0249066	1.13402	0.0164762	0.00342405	1.65154	0.651596	0.119329	26.8117	0.394539	1.7486	0.00207325	0.0150808	0.00262835	0.00926906	0.111876	7.60279	0.000587896	0.00427635	0.00262835	0	0	0.196974	6.86148	0.0183789	0.135853	0.17226	3.84628	0.0471212	0.36012	0.215672
LEM 89-18.d	Fakos	epithermal	epithermal IS	pyrite	anhedral	49.4048	387123	18.0586	802.335	6.82759	3.32633	0.0679226	0.694258	10.4755	40.2182	0.0394341	0.206415	0.00382661	0.101799	0.0494983	1.82953	0.0202912	0.00842473	3.29051	2.8812	0.0225076	12.2225	0.875609	1.72389	0.00256031	0.0150427	0.00218367	0.0119842	0.159547	2.22709	0.000466521	0.00274098	0.00218367	0	0	0.114611	7.43612	0.0205945	0.175368	0.133032	3.32633	0.0679226	0.352948	0.311166
LEM 89-19.d	Fakos	epithermal	epithermal IS	pyrite	anhedral	4373.09	388249	8.62171	38.5606	2.15915	3.17837	0.0747011	0.920226	321.618	2.32739	0.523299	0.0942928	0.00591537	0.104424	1.09461	1.35352	0.137584	0.0116788	14.0946	0.00690296	0.223589	0.165127	0.000489759	0.0268073	0.000828602	0.0776619	0.0606955	0.0371277	0.000800648	0.269945	0.00135458	0.12696	0.0606955	0	0	0.230227	7.27802	0.0146624	0.265433	0.211047	3.17837	0.0438405	0.278157	0.293201
LEM 89-20.d	Fakos	epithermal	epithermal IS	pyrite	anhedral	20.5458	402571	1.80065	347.381	1.70766	4.76181	0.0533498	0.758686	11.8577	47.5442	0.0367745	0.384294	0.00691735	0.134075	0.157584	0.602995	0.0137574	0.00963107	1.44559	0.716066	0.00518349	32.8891	0.495345	0.151854	0.00666238	0.10901	0.0204229	0.025439	0.397672	26.4039	0.00534867	0.0875153	0.0204229	0	0	0.295525	11.8551	0.0765776	0.352389	0.35304	4.76181	0.0533498	0.723579	0.598085
LEM 89-22.d	Fakos	epithermal	epithermal IS	pyrite	anhedral	18.6164	396286	360.053	1.37295	0.162559	2.86806	0.0295065	0.494467	40.5708	47.8391	0.0190731	0.0941525	0.00462402	0.0795077	0.02616	0.525702	0.0163325	0.00828242	0.788945	1.2673	262.248	60.6369	1.60633	8.87467	0.0104981	0.0331583	5.29731e-05	0.0241755	0.00351977	0.132867	2.30034e-05	7.26561e-05	5.29731e-05	0	0	0.250537	6.15741	0.0302608	0.227436	0.162559	2.86806	0.0295065	0.442275	0.29165
LEM 89-23.d	Fakos	epithermal	epithermal IS	pyrite	anhedral	17.6342	368120	2112.67	5.20055	0.154632	2.72971	0.0280871	0.595759	45.0168	45.9157	0.0181473	0.0895848	0.00440144	0.0756605	0.0248985	2.66596	0.000454918	0.00788321	0.731956	0.741207	406.241	62.7301	1.01264	46.9308	0.0107701	0.0340164	8.58972e-06	0.0247929	0.000350838	0.0217334	3.73139e-06	1.17853e-05	8.58972e-06	0	0	0.238485	5.86126	0.028806	0.216505	0.154632	2.72971	0.0280871	0.421035	0.277604
LEM 89-14.d	Fakos	epithermal	epithermal IS	galena	anhedral	0.747711	13.6588	0.0309268	0.329492	0.517918	5.44925	0.119165	1.05261	1.03012	1072.94	744.496	91.4854	0.0178762	0.326158	797.033	104.326	1.00608	76.5283	3.7917e+06	205.635	0.0938622	0.000282972	5.42329e-05	0.0300226	2.01831e-05	0.000210205	24072.8	0.000196349	6649.08	34693	2474.49	25771.6	24072.8	0	0	0.747711	13.6588	0.0309268	0.329492	0.369671	5.44925	0.119165	1.05261	1.03012
LEM 89-15.d	Fakos	epithermal	epithermal IS	galena	anhedral	0.631353	17.7298	0.0476115	0.545711	0.74839	7.30842	0.109946	1.37384	0.71935	1194.81	731.282	104.163	0.0151977	0.252703	701.122	142.581	1.25224	82.5683	3.85848e+06	303.484	0.0872468	0.000309659	7.86537e-05	0.0661868	2.13992e-05	0.000181709	15359.3	0.000189526	6374.17	25095	1734.21	14725.9	15359.3	0	0	0.631353	17.7298	0.0476115	0.545711	0.400785	7.30842	0.109946	1.37384	0.71935
LEM 89-8.d	Fakos	epithermal	epithermal IS	galena	anhedral	1.83966	79.9713	0.173227	1.9188	0.786823	21.5743	0.337303	3.40043	3.18256	2208.7	1533.22	118.317	0.0861113	1.19511	929.258	223.38	0.168528	119.912	5.92743e+06	1634.62	0.0902792	0.000372624	0.000275772	0.0544302	2.02301e-05	0.000156773	8850.93	0.000258666	9436.26	12750.3	692.225	5364.39	8850.93	0	0	1.83966	79.9713	0.173227	1.9188	0.616509	21.5743	0.337303	3.40043	3.18256
LEM 89-9.d	Fakos	epithermal	epithermal IS	galena	anhedral	1.4531	50.8813	0.156782	0.932687	1.16451	18.435	0.324897	2.23749	2.35703	1991.97	1615.59	143.945	0.0407027	0.547879	1533.78	115.637	0.304482	121.54	5.58596e+06	939.882	0.168097	0.000356602	0.000168258	0.0665166	2.1758e-05	0.000274577	10304.7	0.000289224	5994.85	12705.4	775.216	9782.89	10304.7	0	0	1.23467	50.8813	0.156782	0.729343	1.16451	18.435	0.324897	2.23749	2.35703
LEM 89-16.d	Fakos	epithermal	epithermal IS	sphalerite	subhedral, inclusions	5316.99	5492.43	45.8479	0.292222	914.572	740606	0.611709	0.73569	0.423558	3.26598	5.20767	3337.11	4.42371	0.971075	0.5514	0.129392	0.0170341	0.00760507	13.7768	0.0116329	156.894	0.237063	0.000844384	108.245	0.000552018	0.0400237	0.113586	0.378002	0.000253729	0.0712351	0.000165876	0.0120267	0.113586	0	0	0.338075	9.49395	0.0254953	0.292222	0.214542	3.91324	0.0588734	0.73569	0.385186
LEM 89-17.d	Fakos	epithermal	epithermal IS	sphalerite	subhedral, inclusions	4303.74	5303.48	62.3281	0.200902	2037.58	683925	1.20015	0.404322	0.95523	4.79948	5.21534	3321.97	2.40401	0.703779	0.202117	0.189675	0.0131935	0.0100564	5.41384	0.008685	310.241	0.88652	0.00160422	65.2493	0.00185754	0.0373334	0.0836757	0.963335	0.000139343	0.0770035	0.000161346	0.00324279	0.0836757	0	0	0.131304	8.51914	0.0235935	0.200902	0.152512	3.81135	0.0778157	0.404322	0.356508
LM-JB-7a-01	Fakos	epithermal	epithermal IS	spahlerite	anhedral	2978.41	5903.21	4.78776	0.345178	7546.39	597328	1.4953	1.15143	0.410453	2.87891	9.11365	3839.07	0.667863	0.182202	0.897532	0.550535	0.0335711	0.0208953	8.70796	0.0299994	13.8704	0.330607	0.00344506	11.6646	0.00239957	0.10307	1.90353	1.04659	0.00626585	0.601306	0.00436432	0.187464	1.90353			0.277683	11.3744	0.052566	0.345178	0.289916	2.2348	0.0675127	1.15143	0.410453
LM-JB-7a-08	Fakos	epithermal	epithermal IS	spahlerite	anhedral	3748.33	5991.95	18.4988	0.463308	6439.82	597372	2.32726	0.707725	0.464019	2.10563	11.4736	3668.27	2.07694	3.05034	0.863179	2.05741	0.0359996	0.0188482	6.21207	0.017321	39.9276	0.338958	0.00278828	39.8664	0.00303413	0.138952	0.620236	1.84699	0.000936331	0.113825	0.00101889	0.0466613	0.620236			0.464653	14.0762	0.0407442	0.463308	0.389955	1.15613	0.0928619	0.707725	0.464019
LM-JB-7a-09	Fakos	epithermal	epithermal IS	spahlerite	anhedral	4884.32	5668.97	20.6785	1.51554	7180.75	577025	2.23968	0.985067	0.508293	2.22035	14.9909	3679.04	0.259245	1.76409	0.12734	0.426095	0.0307778	0.017835	0.265229	0.0193809	13.6443	8.37143	0.0730723	40.6821	0.0672439	0.480111	0.724951	56.5204	0.000937252	0.107375	0.000862494	0.00615808	0.724951			0.306806	12.7403	0.0483024	0.575673	2.05186	1.1331	0.06099	0.985067	0.508293
LM-JB-7a-10	Fakos	epithermal	epithermal IS	spahlerite	anhedral	3434.61	8270.21	17.4825	0.914725	9286.35	588819	1.78261	0.683173	0.453201	3.65213	21.3761	3848.19	0.4677	0.190517	21.2971	0.676589	0.0794038	0.0964515	11.3437	0.0157994	19.1123	0.321953	0.0013928	38.5756	0.00850267	1.87745	1.22271	1.88441	0.000903725	0.208901	0.00551702	1.2182	1.22271			0.458807	12.4777	0.0634068	0.368782	0.429481	1.77599	0.0760063	0.683173	0.453201
LM-JB-7a-11	Fakos	epithermal	epithermal IS	spahlerite	anhedral	5779.92	7823.03	11.1034	1.22271	6348.43	708995	5.86053	0.555722	1.72423	2.20358	13.7854	4036.5	0.520094	1.45013	10.207	0.522207	0.0459719	0.0341675	3.1921	0.0283644	9.08099	0.690323	0.00888581	6.43966	0.0107038	3.19757	1.24155	4.31861	0.00255456	0.198459	0.0030772	0.919261	1.24155			0.254227	11.4797	0.0547667	0.401941	0.239319	1.80093	0.101392	0.555722	0.612792
LM-JB-7a-12	Fakos	epithermal	epithermal IS	spahlerite	anhedral	3650.32	6984.49	15.4286	0.873614	7126.31	599618	4.63918	0.777774	0.407708	2.97824	14.2067	3638.66	2.10731	2.67857	0.15812	0.455685	0.0584806	0.0232523	0.575189	0.022882	17.6607	5.17785	0.0397818	37.8423	0.0404255	0.2749	0.920803	24.6992	0.00148309	0.193033	0.00150709	0.0102485	0.920803			0.312477	13.9802	0.0577805	0.456352	0.250626	1.48874	0.106597	0.777774	0.407708
LM-JB-7a-18	Fakos	epithermal	epithermal IS	spahlerite	anhedral	1631.04	5388.42	1.824	0.351408	896.376	585083	0.494993	1.00245	0.273198	2.32852	2.77571	3496.47	0.0704009	0.36145	0.0878262	0.27061	0.0272692	0.0173118	0.17023	0.0129451	5.19054	13.6787	0.0760447	6.67648	0.101697	0.515927	1.52177	16.3057	0.0070971	1.2766	0.00949115	0.0481504	1.52177			0.264949	9.2286	0.0663165	0.351408	0.379756	1.99154	0.100605	1.00245	0.273198
LM-JB-7a-19	Fakos	epithermal	epithermal IS	spahlerite	anhedral	863.683	5475.81	63.4412	0.679339	2908.45	579416	1.35456	0.720111	0.441993	2.4972	2.79816	3697.49	1.74235	0.086784	1.33786	0.482751	0.0268749	0.0422556	1.15397	0.01759	93.3865	2.16402	0.0152431	143.534	0.0366178	1.15936	0.0441064	2.42482	0.000277265	0.0393625	0.00066606	0.0210883	0.0441064			0.243275	9.36791	0.0287133	0.472622	0.229975	2.12179	0.0666869	0.720111	0.441993
LM-JB-7a-20	Fakos	epithermal	epithermal IS	spahlerite	anhedral	1476.4	4803.04	60.2299	0.379609	1802.97	580644	0.917769	0.903732	0.415385	2.17771	3.76051	3505.84	0.916618	2.17047	0.104701	0.480886	0.0333383	0.0170242	0.111638	0.0175726	158.663	19.5068	0.157406	144.998	0.152494	0.937856	0.0624359	33.6847	0.000291758	0.0361566	0.000282654	0.00173835	0.0624359			0.319627	7.47768	0.0294815	0.379609	0.255886	1.9756	0.0862682	0.903732	0.415385
LM-27B	Fakos	epithermal	epithermal IS	spahlerite	anhedral	n.a.	5703.91	85.6768	2.14881	1904.96	827636	n.a.	n.a.	0.68548	7.77043	3.07911	3848.56	n.a.	n.a.	0.079845	0.438411	0.0357424	0.0265895	1.13634	0.0135778	39.8718	6.83811	0.0119487	124.988	0.0233992	0.0702649	0.0359387	2.70967	0.000158477	0.0906946	0.000310346	0.000931932	0.0359387			n.a.	24.2696	0.0742806	0.452541	1.44834	3.7057	n.a.	n.a.	0.68548
LM-27B	Fakos	epithermal	epithermal IS	spahlerite	anhedral	n.a.	5832.58	89.0116	1.53622	2374.38	838811	n.a.	n.a.	0.500359	3.87949	5.2408	3779.71	n.a.	n.a.	0.103246	0.268183	0.0360712	0.0104967	0.651745	0.0154869	57.9421	5.95247	0.0237623	177.895	0.0161055	0.158414	0.0588778	8.04119	0.000173988	0.0435841	0.000117925	0.00115991	0.0588778			n.a.	19.6261	0.0464341	0.431477	0.962779	8.25586	n.a.	n.a.	0.327862
LM27B_VI_sp1	Fakos	epithermal	epithermal IS	spahlerite	anhedral	n.a.	9939.04	51.0557	2.7749	9523.02	889953	n.a.	n.a.	2.75873	3.80618	18.4701	4778.48	n.a.	n.a.	0.80288	0.615043	0.0381633	0.0207416	1.64102	0.0185089	18.3991	2.3194	0.0112789	18.5069	0.0126395	0.489256	0.361763	11.2552	0.000362523	0.0745496	0.000406255	0.0157256	0.361763			n.a.	34.5574	0.0888709	0.596748	1.39611	6.04129	n.a.	n.a.	0.983572
LM-27B	Fakos	epithermal	epithermal IS	spahlerite	anhedral	n.a.	10621.8	22.0927	2.84436	11312.2	821133	n.a.	n.a.	0.539442	2.61763	14.7327	4154.84	n.a.	n.a.	0.0707207	0.461241	0.0379518	0.0182757	1.48904	0.0167992	7.76722	1.75793	0.0112819	40.9548	0.0122735	0.047494	0.666859	9.89409	0.000760395	0.118484	0.000827227	0.00320108	0.666859			n.a.	25.5456	0.0511643	0.580311	0.673146	4.62332	n.a.	n.a.	0.539442
LM-27B	Fakos	epithermal	epithermal IS	spahlerite	anhedral	n.a.	8702.29	69.4337	3.58266	9197.29	820204	n.a.	n.a.	0.431091	3.37746	9.6522	4065.76	n.a.	n.a.	0.462647	0.446507	0.042421	0.103112	5.12355	0.016548	19.3805	0.659204	0.00322979	161.065	0.0201251	0.090298	0.139013	1.88389	0.000238328	0.048643	0.00148504	0.00666314	0.139013			n.a.	19.814	0.0543389	0.326883	0.85737	5.12684	n.a.	n.a.	0.296231
LM-27B	Fakos	epithermal	epithermal IS	spahlerite	anhedral	n.a.	7566.58	73.6746	1.97391	8361.88	818615	n.a.	n.a.	0.383478	3.9831	15.0223	3939.87	n.a.	n.a.	19.1945	0.581881	0.0337299	0.12848	2944.97	1.51007	37.3242	0.00135251	0.000512764	192.122	4.3627e-05	0.00651771	0.203901	0.00510102	0.0204965	0.0540633	0.00174389	0.26053	0.203901			n.a.	20.1021	0.0457769	0.334277	0.607536	4.3825	n.a.	n.a.	0.383478
LM-27B-72	Fakos	epithermal	epithermal IS	spahlerite	anhedral	2247.88	5465.24	31.8371	0.504601	7292.24	687021	7.28138	0.277411	2.17802	1.1489	7.36714	3420.23	2.01627	1.47929	1.23391	1.14685	0.320909	0.131962	1082.29	0.122153	63.0937	0.00106155	0.000112866	14.6175	0.000121929	0.0011401	0.231401	0.00680702	0.0038368	0.0360869	0.00414489	0.038757	0.231401			0.120834	6.01511	0.017253	0.179411	0.100708	2.15695	0.0242151	0.262022	0.479236
LM-27B-71	Fakos	epithermal	epithermal IS	spahlerite	anhedral	6265.25	13208.3	18.0654	1.13539	18120.4	662513	2.19896	0.28853	0.538398	3.05633	2.20298	3035.3	2.61814	6.41843	0.746328	0.203924	0.0433268	0.0583189	8.011	0.0047788	15.9112	0.381517	0.000596529	33.554	0.00727985	0.0931629	0.121945	0.274995	0.000264527	0.169182	0.00322821	0.0413125	0.121945			0.150191	5.7466	0.0155052	0.112737	0.161379	3.40258	0.0310147	0.28853	0.488988
LM-27B-74	Fakos	epithermal	epithermal IS	spahlerite	anhedral	4627.23	5549.15	11.4488	1.46352	3882.95	683150	6.66316	0.338051	0.342112	1.64232	4.84139	3447.58	0.758359	3.33064	0.0237108	0.273828	0.0331468	0.00338365	0.493104	0.0132347	7.82281	3.33058	0.0268396	33.4651	0.00686195	0.0480848	0.422872	9.81819	0.00115599	0.143449	0.000295546	0.00207103	0.422872			0.117641	4.66419	0.0195013	0.233065	0.143194	2.99029	0.0319001	0.338051	0.342112
LM-27B-60	Fakos	epithermal	epithermal IS	spahlerite	anhedral	5991.12	5317.22	53.6224	2.13795	6826.3	669934	0.858243	0.29327	0.336531	2.83416	13.9876	3108.87	4.63354	2.28127	0.0179156	0.084539	0.0168659	0.00901937	0.604473	0.00653111	25.0813	4.68865	0.0108046	159.339	0.0149211	0.0296383	0.260853	23.1401	0.000121798	0.0528541	0.000168202	0.000334106	0.260853			0.147376	7.12464	0.023243	0.1636	0.154534	4.21721	0.0362481	0.29327	0.336531
LM-27B-62	Fakos	epithermal	epithermal IS	spahlerite	anhedral	5306.13	5290.85	59.2895	1.95794	6772.09	686349	1.25092	0.183737	0.557827	3.6102	12.8381	3105.89	7.90316	1.94466	0.0175502	0.02942	0.0166669	0.00806662	0.779529	0.00615814	30.2815	4.63126	0.00789982	106.286	0.0103481	0.0225139	0.216533	16.4691	0.000103866	0.0608911	0.000136055	0.000296009	0.216533			0.152154	7.97284	0.0271145	0.143301	0.13325	5.0167	0.0240845	0.183737	0.557827
LM-27B-63	Fakos	epithermal	epithermal IS	spahlerite	anhedral	3977.05	5796.44	20.1497	2.03672	5668.75	672566	7.69632	0.411438	0.555905	1.57468	5.49766	3079.93	1.44913	20.1197	0.365019	0.176919	0.0303124	0.00951757	3.85656	0.00671839	9.89322	0.408313	0.00174206	36.2467	0.00246789	0.0946488	0.272841	1.42553	0.000333424	0.0781493	0.000472343	0.0181154	0.272841			0.195767	8.49543	0.0272221	0.184786	0.207174	5.52079	0.0243296	0.411438	0.555905
LM-27B-52	Fakos	epithermal	epithermal IS	spahlerite	anhedral	4656.79	4819.4	88.3341	1.76279	2837.34	664388	0.432553	0.536717	0.348721	1.73297	3.31813	2926.96	2.59765	0.191287	0.0903601	0.141115	0.027693	0.00619611	1.08464	0.00413508	50.1103	1.59774	0.00381242	253.309	0.00571262	0.0833091	0.0375634	3.05921	4.68119e-05	0.0196183	7.0144e-05	0.00102294	0.0375634			0.173244	2.63469	0.0218355	0.210091	0.177949	2.54053	0.0419165	0.536717	0.348721
LM-27B-53	Fakos	epithermal	epithermal IS	spahlerite	anhedral	3393.25	9056.15	58.2441	2.28378	8708.65	646590	8.13743	0.482009	0.233912	0.970651	9.20474	3115.35	0.718071	0.828932	0.0244136	0.11964	0.0165486	0.00631211	0.348431	0.00612084	25.5033	2.78578	0.0175669	249	0.0181158	0.0700674	0.158037	26.4177	0.00010509	0.0166652	0.000108373	0.000419161	0.158037			0.1572	5.41165	0.0261738	0.186245	0.114251	5.00508	0.0248808	0.482009	0.233912
LM-27B-54	Fakos	epithermal	epithermal IS	spahlerite	anhedral	3190.98	4642.46	90.1171	1.41572	2542.82	662794	0.985101	0.374395	0.452637	3.00835	1.90967	2969.3	4.3734	4.35658	0.162552	6.26462e-05	0.0129134	0.00541599	1.38053	0.00477508	63.6547	2.17914	0.00345888	199.094	0.00392314	0.117746	0.0211909	1.38329	5.29875e-05	0.0333827	6.00994e-05	0.00180379	0.0211909			0.204556	6.46492	0.0288269	0.167415	0.136414	4.89865	0.0245325	0.25072	0.452637
LM-27B-86	Fakos	epithermal	epithermal IS	spahlerite	anhedral	2941.26	4715.84	88.7142	1.24939	1897.31	664220	1.48411	0.380691	0.347689	5.29657	1.46898	2971.89	13.8497	4.40471	0.138806	0.0912019	0.0131181	0.00633006	1.56876	0.0112412	71.0062	3.37629	0.00716568	255.154	0.00403508	0.0884814	0.0165586	0.936397	0.000126713	0.0597038	7.13534e-05	0.00156464	0.0165586			0.159154	5.49997	0.0198387	0.13437	0.166605	4.7888	0.02138	0.380691	0.347689
LM-27B-88	Fakos	epithermal	epithermal IS	spahlerite	anhedral	2588.07	4615.14	72.7847	2.31544	1600.72	661439	0.525334	0.307599	0.291421	2.99326	2.12971	3017.91	5.50574	0.953327	0.0476202	0.236718	0.0157127	0.00562001	0.523541	0.00665897	31.4345	5.71734	0.0127191	249.758	0.0107346	0.090958	0.0292604	4.0679	9.14886e-05	0.0411249	7.72142e-05	0.000654262	0.0292604			0.210215	6.51714	0.035569	0.243952	0.145962	5.56868	0.023319	0.307599	0.291421
LM-29	Fakos	epithermal	high sulfidation	spahlerite	0	n.a.	1233.02	0.191475	1.63599	374.781	887034	n.a.	n.a.	31.4545	2.54099	0.95536	2632.05	n.a.	n.a.	9.42509	0.490826	0.0302763	0.502394	11.6564	0.0648119	0.117039	0.217991	0.00556021	0.00608738	0.0431003	0.808579	4.98947	0.0819604	0.338487	13.2706	2.62381	49.2236	4.98947			n.a.	21.9819	0.0317707	0.38866	0.941012	4.64115	n.a.	n.a.	0.294052
LM-29-94	Fakos	epithermal	high sulfidation	spahlerite	0	80.6838	512.596	0.0390909	0.366139	156.753	692147	68.0585	1.29846	7.87365	1.09435	2.0295	2257.18	0.0192811	0.170162	3.70355	0.123708	0.0204861	2.41496	4.28722	0.00833645	0.106765	0.255258	0.00194449	0.00496478	0.563293	0.863859	51.9176	0.473385	0.213258	27.9949	61.778	94.7421	51.9176			0.167313	7.24486	0.0195833	0.178147	0.183936	2.74121	0.0310256	0.297794	0.341246
LM-29-99	Fakos	epithermal	high sulfidation	spahlerite	0	375.815	978.304	0.152457	0.892168	291.6	711813	58.1693	3.60988	29.9039	1.45758	5.7462	2542.26	0.0299202	0.683783	10.7458	0.203312	0.0684956	1.13285	16.0622	0.0512185	0.170884	0.0907461	0.00318876	0.00509825	0.0705287	0.669009	37.6906	0.357747	0.335953	9.56059	7.43058	70.4837	37.6906			0.200371	5.34876	0.018434	0.211715	0.0979853	4.60806	0.0248906	0.409861	0.521129
LM-29-97	Fakos	epithermal	high sulfidation	spahlerite	0	18.3878	280.669	0.0661403	0.24609	97.318	697740	34.7657	0.754525	2.89627	0.719369	0.971344	2727.24	0.0109075	0.957444	4.05554	0.241328	0.0121426	1.82893	6.36441	0.0114366	0.268764	0.11303	0.00179696	0.0228363	0.287368	0.637221	14.6861	0.152621	0.172914	10.8764	27.6522	61.3172	14.6861			0.187389	2.77395	0.0306714	0.185328	0.198847	2.19377	0.0358673	0.384495	0.392332
LM-29-150	Fakos	epithermal	high sulfidation	spahlerite	0	1991.33	1685.71	0.820436	2.03746	92.6055	718090	48.2095	1.09165	0.772959	1.87811	0.24522	2235.18	1.03573	0.155947	0.428015	0.139286	0.0196529	0.0470168	2.37644	0.012718	0.402675	0.790304	0.0053517	1.06142	0.0197846	0.180108	0.29889	0.103188	0.0155015	2.28916	0.0573071	0.521693	0.29889			0.200983	8.26831	0.0154311	0.111961	0.0945705	4.20517	0.0579908	0.359996	0.604189
LM-29-148	Fakos	epithermal	high sulfidation	spahlerite	0	194.603	456.19	0.0501864	0.754945	54.0681	740509	23.635	0.317515	0.556061	1.2744	1.47736	2090.89	0.0172508	0.413867	0.0177904	0.175911	0.0155512	1.23516	4.44984	0.0153687	0.0664769	0.286393	0.00345376	0.0902534	0.277574	0.00399799	29.4375	0.332003	0.306232	25.3934	24.6114	0.354486	29.4375			0.183689	10.9673	0.0196772	0.270033	0.192244	4.58271	0.0421909	0.317515	0.556061
LM-29-149	Fakos	epithermal	high sulfidation	spahlerite	0	1342.35	1104.75	1.15033	0.876813	150.529	696910	170.482	1.46601	0.308946	1.56218	1.21451	2067.93	0.0183331	0.403367	0.0146631	0.103346	0.0175684	1.01615	0.704837	0.00553294	1.31194	2.21636	0.00784995	3.72339	1.44169	0.0208035	1.0558	1.72311	0.00480988	1.35803	0.883362	0.0127469	1.0558			0.120883	8.09408	0.044364	0.221728	0.140062	5.74335	0.0370128	0.391204	0.308946
LM-29-125	Fakos	epithermal	high sulfidation	spahlerite	0	37.1725	311.113	0.229127	0.211388	115.389	701655	21.1554	0.395237	0.703638	1.27227	0.64108	3580.81	0.103305	2.34396	0.816592	0.101593	0.0147575	0.0329607	0.94867	0.0173926	1.08392	1.34111	0.0183337	0.325633	0.0347442	0.860776	2.79792	0.675767	0.0759081	5.55268	0.143853	3.56392	2.79792			0.160949	5.66097	0.0225027	0.204204	0.128062	3.50646	0.0536082	0.34444	0.532861
LM-29-126	Fakos	epithermal	high sulfidation	spahlerite	0	23.2018	258.976	0.0434261	0.259195	108.694	716550	52.148	1.27112	3.02967	1.46172	0.669436	2576.73	0.0393226	1.27134	1.55148	0.156245	0.0220257	0.38877	1.77319	0.0101575	0.167542	0.824344	0.00572838	0.0143336	0.219248	0.874963	15.4155	0.377531	0.233903	33.66	8.95244	35.7268	15.4155			0.21416	7.85008	0.038295	0.259195	0.229283	4.8695	0.0398788	0.560626	0.338233
LM-29-127	Fakos	epithermal	high sulfidation	spahlerite	0	155.692	492.788	0.0331139	0.59405	177	700980	51.9913	1.99751	11.6928	1.51536	1.44211	2237.03	0.0124205	0.271737	3.98109	1.46778e-05	0.0251828	0.840873	12.3168	0.054857	0.0557425	0.123032	0.00445382	0.002832	0.0682702	0.323223	43.55	0.117084	1.65662	45.7622	25.3934	120.224	43.55			0.278591	10.8739	0.0331139	0.184891	0.256303	3.57172	0.0232307	0.375437	0.589239
LM-33b	Fakos	epithermal	epithermal IS	spahlerite	0	n.a.	1922.41	1.57177	1.17883	34.4594	843502	n.a.	n.a.	0.533425	5.16163	0.181918	4339.31	n.a.	n.a.	0.0625864	0.373385	0.0250809	0.0180776	0.294087	0.0111891	1.33332	17.5514	0.0380471	2.94656	0.0614704	0.212816	0.115741	0.618588	0.00711882	3.28397	0.0115014	0.0398191	0.115741			n.a.	25.8277	0.0619829	0.346395	0.593826	5.20984	n.a.	n.a.	0.533425
LM-33b	Fakos	epithermal	epithermal IS	spahlerite	0	n.a.	1897.94	0.492176	0.576538	29.3505	857487	n.a.	n.a.	0.499455	2.71521	0.219801	4544.07	n.a.	n.a.	0.156897	0.315525	0.0391475	0.0170323	1.0395	0.0124747	0.853675	2.61205	0.0120007	0.985426	0.0163851	0.150936	0.44659	0.21145	0.0253461	5.51675	0.0346061	0.318783	0.44659			n.a.	32.1966	0.0534103	0.25829	0.718468	5.41982	n.a.	n.a.	0.499455
LM-33b	Fakos	epithermal	epithermal IS	spahlerite	0	n.a.	5002.87	6.20037	0.785126	2853.97	834856	n.a.	n.a.	168.733	3.71084	234.273	4252.51	n.a.	n.a.	2048.81	0.636012	0.123718	0.0145754	4.67121	0.0633739	7.8973	0.794406	0.0135669	0.0367466	0.00312026	438.605	37.7838	50.1527	0.010221	0.598486	0.00235072	330.434	37.7838			n.a.	19.3487	0.0662971	0.255594	0.751603	4.20504	n.a.	n.a.	0.478195
LM-33a	Fakos	epithermal	epithermal IS	spahlerite	0	n.a.	7311.02	45.7805	0.852319	1906.16	808593	n.a.	n.a.	0.603138	4.42314	4.05948	4047.65	n.a.	n.a.	0.0795832	0.248094	0.0330684	0.0079694	2.23861	0.013809	53.7129	1.97584	0.00616856	75.9038	0.00355998	0.0355503	0.0886727	1.81339	0.000301635	0.0966162	0.000174079	0.00173836	0.0886727			n.a.	22.8942	0.051529	0.286745	0.714614	4.27603	n.a.	n.a.	0.603138
LM-33a	Fakos	epithermal	epithermal IS	spahlerite	0	n.a.	7532.71	55.7608	1.10813	3089.57	791527	n.a.	n.a.	0.534308	3.67086	7.47819	4069.59	n.a.	n.a.	3.88583	0.531296	0.0365186	0.0156404	3.25389	0.0112925	50.3198	1.12815	0.00347047	104.361	0.00480668	1.19421	0.134112	2.29823	0.000202517	0.0658322	0.000280491	0.0696875	0.134112			n.a.	17.1323	0.0689229	0.463789	0.728657	6.60562	n.a.	n.a.	0.534308
LM-33a	Fakos	epithermal	epithermal IS	spahlerite	0	n.a.	1777.25	0.197799	0.531164	59.1056	868630	n.a.	n.a.	5.09815	2.82773	0.265893	4184.15	n.a.	n.a.	1.54435	0.378355	0.025211	0.0192354	0.66925	0.0134051	0.372389	4.22522	0.02003	0.0387983	0.0287418	2.30758	1.34426	0.3973	0.0677712	14.2959	0.0972472	7.80764	1.34426			n.a.	17.543	0.0370237	0.531164	0.670726	3.88756	n.a.	n.a.	0.581886
LM-33a-251	Fakos	epithermal	epithermal IS	spahlerite	0	4176.22	6509.12	40.1635	1.39742	2790.34	696762	2.91084	0.306002	0.281241	0.886136	8.2343	2880.15	0.237753	2.76296	1.50909	0.113862	0.0429747	0.005733	17.9407	0.0108049	28.7412	0.0493925	0.000602255	142.808	0.000319553	0.0841153	0.20502	0.458973	0.000269022	0.0220632	0.000142742	0.0375736	0.20502			0.193882	6.01778	0.0263474	0.152654	0.161804	2.22157	0.0233068	0.306002	0.281241
LM-33a-254	Fakos	epithermal	epithermal IS	spahlerite	0	2710.41	6615.57	9.66713	1.09987	3358.01	704159	3.39876	0.34766	0.355589	1.24906	5.23772	2956.14	0.796258	2.40077	0.0898779	0.115852	0.0183037	0.00445314	7.08511	0.0150227	8.78937	0.176294	0.00212032	27.1863	0.000628521	0.0126855	0.541807	0.739258	0.001554	0.129207	0.000460648	0.00929727	0.541807			0.18812	5.47011	0.018519	0.144458	0.0882903	2.26461	0.0364398	0.34766	0.355589
LM-33a-262	Fakos	epithermal	epithermal IS	spahlerite	0	4721.5	4258.51	10.8477	1.30953	1023.25	712355	4.94421	0.264465	0.303729	3.4665	4.11347	3155.48	3.11987	3.10382	0.239564	0.462575	0.0194249	0.00412803	8.61465	0.0146502	8.28368	0.402396	0.00170062	35.7152	0.000479188	0.0278089	0.379202	0.477497	0.00135053	0.31956	0.000380544	0.0220842	0.379202			0.145126	5.71049	0.0252453	0.111168	0.144088	3.56004	0.0214351	0.264465	0.254441
LM-33a-263	Fakos	epithermal	epithermal IS	spahlerite	0	4159.75	2768.17	1.51061	1.1485	194.143	711202	13.4702	0.37149	0.35764	1.10266	2.65056	2888.39	7.46795	5.35806	0.321278	0.0716432	0.0257016	0.0134523	1.53144	0.00912461	1.31529	0.720015	0.00595818	4.22383	0.00878405	0.209788	1.75463	1.73076	0.00604035	0.729945	0.00890519	0.212681	1.75463			0.161323	4.78717	0.0186883	0.133884	0.105345	2.2308	0.0259648	0.37149	0.35764
LM-33a-275	Fakos	epithermal	epithermal IS	spahlerite	0	5731.93	2203.74	5.37334	1.86989	25.8734	720895	8.68346	0.292934	0.396885	2.51795	0.18374	3207.14	1.3426	0.614062	0.0493913	0.0989399	0.017961	0.00800061	2.227	0.00660502	2.87362	1.13064	0.00296588	13.5388	0.00359255	0.0221784	0.0341947	0.0825054	0.00122922	0.4686	0.00148894	0.00919191	0.0341947			0.119509	5.78808	0.0266448	0.0935223	0.0953401	2.6836	0.0397242	0.292934	0.396885
LM-33a306	Fakos	epithermal	epithermal IS	spahlerite	0	5348.69	1728.62	5.09018	3.13839	26.2738	682683	6.70085	0.244608	0.347958	3.05213	0.209982	3246.4	2.74284	3.29615	0.22695	0.0768296	0.0165027	0.00630811	1.41144	0.00701608	1.62191	2.16242	0.00497087	14.6287	0.00446928	0.160793	0.0412525	0.148772	0.00137836	0.599611	0.00123927	0.0445859	0.0412525			0.127777	5.2993	0.0222772	0.163331	0.148051	2.59532	0.038649	0.244608	0.347958
LM-33a-302	Fakos	epithermal	epithermal IS	spahlerite	0	2636.6	4622.65	7.94788	0.447107	5822.97	665333	4.86059	0.511543	0.639692	2.31778	9.66971	3188.24	3.60663	4.53339	0.925607	0.376395	0.0403507	0.0156427	18.1855	0.0170069	17.7762	0.127452	0.00093519	12.4245	0.000860175	0.050898	1.21664	0.531726	0.00213981	0.291623	0.00196816	0.11646	1.21664			0.380892	6.12095	0.0286486	0.447107	0.226282	6.02184	0.0443442	0.511543	0.639692
LM-64-75	Fakos	porphyry	overprinting epithermal vein	spahlerite	0	2724.98	3937.73	3.71167	0.632757	2027.33	642337	6.27421	0.635511	0.807933	7.47833	1.62335	3160.39	549.622	72.0722	0.0308389	0.276092	0.029333	0.0115989	0.30986	0.0139153	5.86587	24.1346	0.0449083	4.59403	0.0374329	0.0995253	0.437364	5.23899	0.00374906	2.01482	0.00312499	0.00830863	0.437364			0.431869	12.9123	0.0386439	0.243256	0.255561	8.44523	0.0484169	0.635511	0.807933
LM-64-76	Fakos	porphyry	overprinting epithermal vein	spahlerite	0	2305.56	3818.03	4.57492	0.406032	801.263	640221	6.43667	0.552675	0.478719	5.79019	1.46707	3141.17	341.359	138.656	0.210081	0.188615	0.0388849	0.00973889	2.54807	0.331206	11.2674	2.27238	0.129983	9.55658	0.00382206	0.0824472	0.320676	0.575756	0.072396	1.26564	0.00212876	0.0459202	0.320676			0.279126	9.0667	0.0547922	0.406032	0.244583	11.6599	0.0693869	0.552675	0.472451
LM-64-78	Fakos	porphyry	overprinting epithermal vein	spahlerite	0	4426.85	3190.85	0.753364	1.11959	2735.34	646764	0.753641	0.492955	0.844128	5.24781	7.50211	3106.85	66.6028	0.304576	0.527136	0.59799	0.04907	0.0211371	4.47809	0.970846	0.672893	1.17189	0.216799	0.892475	0.00472012	0.117715	9.95816	1.67529	1.28868	6.96584	0.028057	0.699711	9.95816			0.330715	11.6188	0.0589255	0.323923	0.300641	8.42091	0.0615284	0.492955	0.844128
LM-JB-7D-02	Fakos	epithermal	epithermal IS	chalcopyrite	subhedral	11.8249	333617	0.121311	1.55946	331221	116.902	0.29249	2.26282	0.882123	7.43632	44.2822	0.59501	5.02837	0.330825	0.205344	0.98183	0.407983	0.0599177	12.2117	0.0550511	0.0777905	0.608951	0.00450807	0.137521	0.00490659	0.0168154	365.031	3.62622	0.453802	61.2997	0.493919	1.69271	365.031			1.47619	33.0211	0.121311	1.55946	1.07949	5.4505	0.198791	2.26282	0.882123
LM-JB-7D-07	Fakos	epithermal	epithermal IS	chalcopyrite	subhedral	11.8616	289097	0.237519	1.55956	337939	194.559	0.384419	2.61956	1.87878	25.7294	1.39427	3.02282	62.4491	0.846541	1.54572	0.864172	0.170753	0.0969704	14.0389	0.0787236	0.152299	1.83273	0.00560754	0.126422	0.00690727	0.110103	5.87016	0.0993151	0.331441	108.326	0.408264	6.5078	5.87016			2.20896	59.244	0.237519	1.55956	1.44215	4.98166	0.384419	2.61956	1.87878
LM-JB-7D-18	Fakos	epithermal	epithermal IS	chalcopyrite	subhedral	12.8766	378311	0.241328	1.05953	354352	125.843	2.44864	2.57291	1.09619	70.9051	17.1853	2.63296	63.5886	2.24919	4.03203	1.70318	0.132627	0.0625234	579.923	0.143706	0.22777	0.122267	0.000247803	0.220151	0.000107813	0.0069527	71.2115	0.0296338	0.595482	293.812	0.259081	16.7077	71.2115			1.39905	28.6669	0.241328	1.05953	1.01029	7.02521	0.198742	2.57291	1.09619
LM-JB-7A-02	Fakos	epithermal	epithermal IS	chalcopyrite	subhedral	12.9507	285629	0.184503	1.58443	306006	95.4911	0.240211	2.69604	5.78427	7.45644	18.952	0.939995	0.525864	0.403371	5.08019	0.879752	0.0654845	0.0764307	8.08016	0.0577542	0.116447	0.922808	0.00714766	0.0318973	0.00945905	0.628724	102.719	2.3455	0.313027	40.4138	0.414253	27.5345	102.719			1.14083	31.5823	0.184503	1.58443	1.01728	7.85624	0.170866	1.6112	1.08576
LM--JB-7A-03	Fakos	epithermal	epithermal IS	chalcopyrite	subhedral	12.655	294998	0.263556	1.84367	305190	105.694	0.345892	3.39533	2.95963	9.42682	69.1637	1.22225	0.347594	0.441824	0.991861	0.792036	0.0799701	0.0770848	1.0629	0.0512862	0.142951	8.86896	0.0482512	0.0890502	0.0725231	0.933165	262.426	65.0707	0.194594	35.7679	0.29248	3.76338	262.426			1.21222	51.4851	0.263556	1.84367	1.14511	4.0538	0.345892	3.39533	1.71468
LM-33b_X_66	Fakos	epithermal	epithermal IS	chalcopyrite	0	n.a.	169528	0.118456	0.779085	212229	159.054	n.a.	n.a.	0.894874	9.79394	29.1764	1.15814	n.a.	n.a.	0.503581	0.867517	0.0495482	0.0216538	1.36391	0.031299	0.152045	7.18079	0.022948	0.132372	0.0158763	0.369219	246.305	21.3918	0.264224	82.6798	0.1828	4.2512	246.305			n.a.	61.7016	0.118456	0.779085	1.08512	8.15555	n.a.	n.a.	0.894874
LM-33b_III_173	Fakos	epithermal	epithermal IS	chalcopyrite	0	n.a.	219151	0.107114	0.585959	249724	381.264	n.a.	n.a.	0.997379	5.86207	53.7882	3.67724	n.a.	n.a.	0.260484	0.443166	0.0772271	0.0272076	0.433063	0.0185253	0.182801	13.5363	0.0427774	0.107395	0.0628259	0.601492	502.159	124.204	0.17295	54.7274	0.254006	2.43184	502.159			n.a.	41.7563	0.107114	0.585959	1.16447	5.69044	n.a.	n.a.	0.997379
LM-33b_III_174	Fakos	epithermal	epithermal IS	chalcopyrite	0	n.a.	224132	0.0806921	0.918867	289209	1069.91	n.a.	n.a.	0.602861	6.67998	72.0064	10.3208	n.a.	n.a.	0.184958	0.962722	0.046024	0.0215877	0.61515	0.0212055	0.087817	10.8591	0.0344721	0.133849	0.0350934	0.300672	892.359	117.055	0.262795	82.7835	0.267532	2.29215	892.359			n.a.	21.8774	0.0806921	0.918867	1.47129	7.04455	n.a.	n.a.	0.602861
LM-33b_II_101	Fakos	epithermal	epithermal IS	chalcopyrite	0	n.a.	192852	0.188679	0.781184	221809	188.343	n.a.	n.a.	0.85402	2.48818	21.9053	4.50072	n.a.	n.a.	0.965943	0.670022	0.0440516	0.0188931	16.9968	0	0.24153	0.146391	0	0.220931	0.00111157	0.056831	116.098	1.28879	0	13.1873	0.100134	5.11949	116.098			n.a.	65.8053	0.188679	0.781184	1.64347	10.5395	n.a.	n.a.	0.85402
LM-33b_IV_149	Fakos	epithermal	epithermal IS	chalcopyrite	0	n.a.	172814	0.113409	0.607018	205931	404.952	n.a.	n.a.	0.885719	6.96207	135.641	5.58104	n.a.	n.a.	0.417924	1.13209	0.0669849	0.0309259	1.40933	0.037516	0.18683	4.93999	0.0266198	0.128042	0.0219437	0.296541	1196.03	96.245	0.330802	61.3888	0.272692	3.68509	1196.03			n.a.	56.8776	0.113409	0.607018	1.88581	7.5773	n.a.	n.a.	0.885719
LM-33b_IV_148	Fakos	epithermal	epithermal IS	chalcopyrite	0	n.a.	237447	0.14178	0.707798	262155	190.593	n.a.	n.a.	1.25196	4.07569	109.738	1.61723	n.a.	n.a.	0.153814	1.00329	0.0766588	0.0347103	1.36806	0.0207034	0.200311	2.97917	0.0151334	0.113246	0.0253719	0.112432	774.003	80.2143	0.146025	28.7466	0.244818	1.08488	774.003			n.a.	62.0688	0.14178	0.554038	1.45314	7.04559	n.a.	n.a.	1.25196
LM-33b_XI_158	Fakos	epithermal	epithermal IS	chalcopyrite	0	n.a.	208236	0.186303	0.704485	269179	1055.24	n.a.	n.a.	0.614019	5.66925	186.625	12.1901	n.a.	n.a.	0.364116	0.883406	0.103187	0.032207	0.421897	0.0234597	0.264453	13.4375	0.0556054	0.303416	0.0763386	0.863044	1001.73	442.347	0.125922	30.4302	0.172874	1.95443	1001.73			n.a.	56.2528	0.186303	0.704485	1.65773	10.5612	n.a.	n.a.	0.614019
LM-33b_XI_161	Fakos	epithermal	epithermal IS	chalcopyrite	0	n.a.	217685	0.0693272	1.78098	251929	481.809	n.a.	n.a.	1.14393	5.47689	173.663	18.2405	n.a.	n.a.	0.483434	0.604864	0.0529143	0.0311492	0.825255	0.0386835	0.0389265	6.6366	0.0468746	0.0606044	0.0377449	0.585799	2504.98	210.436	0.557985	79.0006	0.449307	6.97323	2504.98			n.a.	39.1899	0.0693272	1.78098	1.75077	8.48175e-05	n.a.	n.a.	1.14393
LM-33a_III_284	Fakos	epithermal	epithermal IS	chalcopyrite	0	n.a.	172866	0.170726	0.923577	218516	263.188	n.a.	n.a.	2.99773	5.70297	124.373	2.29447	n.a.	n.a.	2.95001	0.978584	0.0796766	0.029727	4.52246	0.0232618	0.184853	1.26103	0.00514361	0.0569516	0.0065732	0.652302	728.494	27.5011	0.136252	33.4043	0.174122	17.2792	728.494			n.a.	41.2222	0.170726	0.923577	1.7794	8.22221	n.a.	n.a.	1.09364
LM-33a_III_285	Fakos	epithermal	epithermal IS	chalcopyrite	0	n.a.	170900	0.164905	1.51217	201019	69.6768	n.a.	n.a.	2.38021	8.86572	106.222	0.77438	n.a.	n.a.	33.7452	1.29014	0.0705476	0.0718056	12.7365	0.0323136	0.109052	0.696086	0.00253709	0.0692818	0.00563778	2.64948	644.14	8.33994	0.195953	53.7626	0.435437	204.634	644.14			n.a.	91.8195	0.164905	1.51217	2.48535	11.7154	n.a.	n.a.	1.5195
LM-33a_XIII_296	Fakos	epithermal	epithermal IS	chalcopyrite	0	n.a.	217370	0.127982	0.71021	252866	2207.89	n.a.	n.a.	1.12471	4.15868	84.6241	17.6406	n.a.	n.a.	0.254388	0.67651	0.0555015	0.0335882	0.61307	0.0205765	0.180203	6.78338	0.0335631	0.113791	0.0547869	0.414942	661.218	138.033	0.160777	32.4943	0.262445	1.98769	661.218			n.a.	52.426	0.127982	0.71021	1.50014	8.13001	n.a.	n.a.	1.12471
LM-7D-21	Fakos	epithermal	epithermal IS	galena	anhedral	0.756164	8.57401	0.0812968	0.831134	1.14719	2.00553	0.0920126	0.850082	0.424947	367.43	549.197	47.0764	0.0935521	0.159032	384.347	184.222	0.287132	19.1231	1.52912e+06	211.259	0.0978144	0.000240288	0.000138157	0.191311	1.25059e-05	0.000251351	6755.45	0.000359158	2598.61	4519.61	235.226	4727.7	6755.45			0.329332	8.57401	0.0812968	0.831134	0.274102	2.00553	0.0920126	0.850082	0.424947
LM-7D-22	Fakos	epithermal	epithermal IS	galena	anhedral	3.55861	51.8453	0.0570812	0.681748	2.96192	1.64782	0.0774697	0.796561	0.39383	470.043	468.557	47.729	0.0326922	0.132894	295.167	124.158	0.635121	19.6802	1.49536e+06	263.421	0.0837277	0.000314333	0.000176158	0.144939	1.31608e-05	0.000197388	8208.59	0.000313339	4614.85	8234.63	344.775	5171.01	8208.59			0.378432	11.0159	0.0570812	0.681748	0.307342	1.64782	0.0774697	0.796561	0.343079
LM-7A-25	Fakos	epithermal	epithermal IS	galena	anhedral	10.7645	13.8635	0.0938821	0.698403	0.469168	2.21864	0.0673403	0.76802	0.678954	199.945	328.918	63.5853	0.0265757	0.154397	286.175	82.5381	0.143547	17.9158	1.35527e+06	123.62	0.134424	0.000147532	9.12144e-05	0.138275	1.32194e-05	0.000211157	3503.52	0.000242696	1316.76	2129.75	190.833	3048.24	3503.52			0.348947	13.8635	0.0938821	0.698403	0.469168	2.21864	0.0673403	0.76802	0.678954
LM-7A-26	Fakos	epithermal	epithermal IS	galena	anhedral	11.2532	14.2616	0.158359	0.471411	0.448034	3.06892	0.115186	0.588959	0.599219	512.261	158.347	64.3904	0.0231428	0.230579	150.288	45.3682	0.183654	18.0774	1.30438e+06	76.6865	0.335926	0.000392724	5.87915e-05	0.264276	1.3859e-05	0.000115218	999.921	0.000121396	484.257	3234.81	114.155	949.032	999.921			0.498674	14.2616	0.158359	0.471411	0.448034	3.06892	0.115186	0.588959	0.599219
LM-7A-27	Fakos	epithermal	epithermal IS	galena	anhedral	5.03597	11.4639	0.0545427	0.7872	0.820955	2.03428	0.0554916	1.00396	0.512546	186.702	397.915	45.2159	0.0141948	0.11682	451.823	43.2006	0.393883	17.049	1.34848e+06	19.58	0.069287	0.000138453	1.452e-05	0.106415	1.26431e-05	0.00033506	7295.48	0.000295084	358.984	3423.04	312.58	8283.83	7295.48			0.340314	11.4639	0.0545427	0.7872	0.3512	2.03428	0.0554916	1.00396	0.512546
LM-7A-28	Fakos	epithermal	epithermal IS	galena	anhedral	10.8143	13.0474	0.0557326	0.433352	3.67319	2.38584	0.0880908	0.63846	0.510798	20.4883	340.086	53.7332	0.0115876	0.187012	362.627	62.107	0.229063	18.2856	1.36876e+06	2.87136	0.128608	1.49685e-05	2.09778e-06	0.109109	1.33592e-05	0.00026493	6102.1	0.000248462	51.5203	367.618	328.094	6506.54	6102.1			0.546881	13.0474	0.0557326	0.433352	0.343115	2.38584	0.0880908	0.63846	0.510798
LM-7A-29	Fakos	epithermal	epithermal IS	galena	anhedral	0.788035	9.8968	0.0435639	0.373172	0.394901	1.8088	0.0567763	0.874099	0.497935	492.709	360.69	36.0526	0.0143283	0.195858	300.222	51.286	0.45465	16.7773	1.36887e+06	240.015	0.11674	0.000359938	0.000175338	0.0874892	1.22562e-05	0.00021932	8279.56	0.000263494	5509.5	11310	385.118	6891.52	8279.56			0.461893	9.8968	0.0435639	0.373172	0.394901	1.8088	0.0567763	0.874099	0.497935
LM-7A-30	Fakos	epithermal	epithermal IS	galena	anhedral	0.381017	11.8241	0.0573735	0.606383	0.543522	2.42729	0.0666873	1.05824	0.454953	306.386	400.853	37.6853	0.0233164	0.172637	294.505	81.5528	0.0891599	17.9396	1.37143e+06	241.789	0.094616	0.000223406	0.000176304	0.126108	1.3081e-05	0.000214743	6986.74	0.000292288	4214.3	5340.21	312.682	5133.12	6986.74			0.343083	11.8241	0.0573735	0.606383	0.543522	2.42729	0.0666873	1.05824	0.454953
LM-6A-19	Fakos	epithermal	epithermal IS	galena	subhedral	0.39464	13.0403	0.0834419	0.604865	0.519583	2.90301	0.0540426	1.30765	0.334759	181.709	223.898	30.7133	0.0159469	0.170181	240.295	30.0432	0.0296628	16.8475	1.28025e+06	45.6904	0.137951	0.000141933	3.56888e-05	0.24926	1.31596e-05	0.000187695	2683.28	0.000174887	547.571	2177.67	201.907	2879.79	2683.28			0.39464	13.0403	0.0834419	0.604865	0.519583	2.90301	0.0540426	1.30765	0.334759
LM-6A-20	Fakos	epithermal	epithermal IS	galena	subhedral	0.516963	13.9095	0.0891793	0.604309	0.537285	3.22538	0.126267	1.24236	0.503102	328.415	133.637	41.7581	-0.000318965	0.28886	129.942	7.28508	0.0707514	17.2489	1.34163e+06	122.75	0.147572	0.000244788	9.14935e-05	0.177259	1.28567e-05	9.68537e-05	1498.52	9.96082e-05	1376.44	3682.63	193.418	1457.08	1498.52			0.516963	13.9095	0.0891793	0.604309	0.537285	3.22538	0.126267	1.24236	0.503102
LM27B_III_55	Fakos	epithermal	epithermal IS	galena	anhedral	n.a.	14.3382	0.0560262	0.306373	0.92879	4.55467	n.a.	n.a.	0.613489	313.488	219.512	40.2743	n.a.	n.a.	231.031	48.3526	0.0501787	28.0918	1.29937e+06	137.038	0.182869	0.000241261	0.000105465	0.0913239	2.16195e-05	0.000177802	3918.03	0.000168937	2445.96	5595.38	501.404	4123.63	3918.03			n.a.	14.3382	0.0560262	0.306373	0.92879	4.55467	n.a.	n.a.	0.414833
LM27B_VII_90	Fakos	epithermal	epithermal IS	galena	anhedral	n.a.	13.982	0.0561001	0.209995	18.3819	659.444	n.a.	n.a.	0.165561	280.627	325.804	46.766	n.a.	n.a.	362.611	25.7215	0.0276516	23.2774	1.03304e+06	103.644	0.26715	0.000271651	0.000100329	0.338849	2.25328e-05	0.000351012	5807.55	0.000315383	1847.49	5002.25	414.926	6463.64	5807.55			n.a.	13.982	0.0194066	0.209995	0.478913	3.26579	n.a.	n.a.	0.165561
LM27B_XIII_85	Fakos	epithermal	epithermal IS	galena	anhedral	n.a.	88.5873	0.19936	0.215601	605.046	207.256	n.a.	n.a.	15.3847	284.363	318.21	44.188	n.a.	n.a.	650.871	98.8286	0.184882	23.3402	952734	120.506	0.92467	0.000298471	0.000126484	0.0129583	2.44982e-05	0.000683161	1596.16	0.000333996	604.464	1426.38	117.076	3264.8	1596.16			n.a.	12.0861	0.0345818	0.215601	0.372867	3.48902	n.a.	n.a.	0.345736
LM33b_III_177	Fakos	epithermal	epithermal IS	galena	anhedral	n.a.	38.8495	0.0304288	0.212284	0.380775	2.15021	n.a.	n.a.	0.373451	305.798	588.77	33.5749	n.a.	n.a.	457.41	111.233	0.603311	24.6292	1.01945e+06	94.3363	0.14334	0.000299964	9.25366e-05	0.08148	2.41594e-05	0.000448683	19349.1	0.000577537	3100.23	10049.6	809.406	15032.1	19349.1			n.a.	9.48947	0.0304288	0.212284	0.375709	2.15021	n.a.	n.a.	0.245174
LM33b_VI_127	Fakos	epithermal	epithermal IS	galena	anhedral	n.a.	11.1221	0.0240121	0.181236	0.467409	2.79828	n.a.	n.a.	0.184126	159.358	708.292	43.0029	n.a.	n.a.	854.467	128.195	0.0721012	24.9416	1.01464e+06	17.8323	0.132491	0.000157059	1.75751e-05	0.130411	2.45819e-05	0.000842142	29497.3	0.000698076	742.64	6636.56	1038.71	35584.9	29497.3			n.a.	11.1221	0.0240121	0.181236	0.467409	2.79828	n.a.	n.a.	0.184126
LM33b_II_98	Fakos	epithermal	epithermal IS	galena	anhedral	n.a.	8.76246	0.0306195	0.189381	0.363804	2.2333	n.a.	n.a.	0.216107	374.917	616.61	51.0953	n.a.	n.a.	602.262	100.935	0.255097	25.5262	1.01863e+06	73.6383	0.161682	0.000368059	7.22914e-05	0.141686	2.50593e-05	0.000591246	20137.8	0.000605331	2404.95	12244.4	833.66	19669.3	20137.8			n.a.	8.76246	0.0306195	0.189381	0.288015	2.2333	n.a.	n.a.	0.216107
LM33b_IV_145	Fakos	epithermal	epithermal IS	galena	anhedral	n.a.	7.93896	0.0304905	0.149421	0.29741	3.815	n.a.	n.a.	0.248408	389.169	743.907	55.4467	n.a.	n.a.	814.073	91.2425	0.65997	25.0202	961965	55.2898	0.204058	0.000404556	5.74759e-05	0.122744	2.60095e-05	0.00084626	24398	0.00077332	1813.35	12763.6	820.591	26699.2	24398			n.a.	7.93896	0.0304905	0.149421	0.29741	3.815	n.a.	n.a.	0.248408
LM33a_II_260	Fakos	epithermal	epithermal IS	galena	anhedral	n.a.	7.90378	0.0240577	0.167162	0.387836	2.68518	n.a.	n.a.	0.208133	528.634	348.392	34.867	n.a.	n.a.	413.076	30.9208	0.062262	24.9675	982508	77.3959	0.143919	0.000538045	7.87738e-05	0.115588	2.5412e-05	0.000420431	14481.5	0.000354595	3217.09	21973.5	1037.82	17170.2	14481.5			n.a.	7.90378	0.0240577	0.167162	0.387836	2.68518	n.a.	n.a.	0.208133
LM33a_III_288	Fakos	epithermal	epithermal IS	galena	anhedral	n.a.	24.1371	0.0336013	0.174771	0.443398	2.49931	n.a.	n.a.	0.192275	282.969	307.636	32.473	n.a.	n.a.	368.281	31.3734	0.0903833	24.8704	1.00491e+06	51.1198	0.192259	0.000281587	5.08701e-05	0.174757	2.4749e-05	0.000366482	9155.47	0.000306133	1521.36	8421.37	740.163	10960.3	9155.47			n.a.	12.261	0.0336013	0.174771	0.443398	2.49931	n.a.	n.a.	0.192275
[truncated: 97 more columns]

## Sheet: Kaspakas
sample ID Kaspakas	loc Kaspakas	type Kaspakas	subtype Kaspakas	mineral Kaspakas	texture Kaspakas	Mn (ppm) Kaspakas	Fe (ppm) Kaspakas	Co (ppm) Kaspakas	Ni (ppm) Kaspakas	Cu (ppm) Kaspakas	Zn (ppm) Kaspakas	Ga (ppm) Kaspakas	Ge (ppm) Kaspakas	As (ppm) Kaspakas	Se (ppm) Kaspakas	Ag (ppm) Kaspakas	Cd (ppm) Kaspakas	In (ppm) Kaspakas	Sn (ppm) Kaspakas	Sb (ppm) Kaspakas	Te (ppm) Kaspakas	Au (ppm) Kaspakas	Tl (ppm) Kaspakas	Pb (ppm) Kaspakas	Bi (ppm) Kaspakas	Co/Ni (ppm) Kaspakas	Se/Pb (ppm) Kaspakas	Bi/Pb (ppm) Kaspakas	Co/As (ppm) Kaspakas	Tl/Pb (ppm) Kaspakas	Sb/Pb (ppm) Kaspakas	Ag/Co (ppm) Kaspakas	Ag/Pb (ppm) Kaspakas	Bi/Co (ppm) Kaspakas	Se/Co (ppm) Kaspakas	Tl/Co (ppm) Kaspakas	Sb/Co (ppm) Kaspakas	Ag/Co (ppm) Kaspakas			Mn L.O.D. Howell Kaspakas	Fe L.O.D. Howell Kaspakas	Co L.O.D. Howell Kaspakas	Ni L.O.D. Howell Kaspakas	Cu L.O.D. Howell Kaspakas	Zn L.O.D. Howell Kaspakas	Ga L.O.D. Howell Kaspakas	Ge L.O.D. Howell Kaspakas	As L.O.D. Howell Kaspakas
19III-1.d	Kaspakas	epithermal	epithermal IS	pyrite	anhedral	330.613	492077	1.04652	3.90612	13.7377	3.19838	0.0472082	1.60519	552.277	4.43182	0.230024	0.0490979	0.00722819	0.111148	27.3507	24.425	0.0960756	0.0347959	306.665	0.152732	0.267917	0.0144517	0.000498041	0.00189492	0.000113466	0.0891877	0.219799	0.000750083	0.145943	4.23483	0.0332492	26.135	0.219799			0.18092	5.44561	0.0180548	0.122727	0.145145	3.19838	0.0233254	0.267858	0.322301
19III-2.d	Kaspakas	epithermal	epithermal IS	pyrite	subhedral	19.7727	451143	122.639	88.158	6.21055	2.79421	0.585169	1.32623	5447.62	7.44461	0.301306	0.0842334	0.00700499	0.115314	0.723604	16.4522	0.163369	0.0116388	44.6185	7.32225	1.39113	0.16685	0.164108	0.0225125	0.000260851	0.0162176	0.00245685	0.00675295	0.0597055	0.0607032	9.49022e-05	0.00590026	0.00245685			0.177453	7.3171	0.0210893	0.132489	0.0865878	2.79421	0.0245847	0.290106	0.224555
19III-3.d	Kaspakas	epithermal	epithermal IS	pyrite	subhedral	22.0174	528740	0.230828	5.93797	29.6341	3.94725	0.0845295	1.08138	337.015	4.58513	1.50259	0.140076	0.0129979	0.101431	97.1355	26.5574	0.0282058	0.317436	1338.86	0.683914	0.0388732	0.00342467	0.00051082	0.000684919	0.000237095	0.0725512	6.50957	0.00112229	2.96287	19.8639	1.37521	420.814	6.50957			0.200117	6.9286	0.0284221	0.126622	0.22106	3.94725	0.0181355	0.271871	0.311525
19III-6.d	Kaspakas	epithermal	epithermal IS	pyrite	euhedral	22.5981	422358	14.403	7.19299	440.22	503.358	0.0583807	1.63952	74.3319	6.08267	24.3666	8.50722	0.246109	3.4757	18.7728	12.5151	0.193116	0.0440969	635.063	0.572037	2.00237	0.00957805	0.000900756	0.193766	6.94369e-05	0.0295605	1.69177	0.0383688	0.0397165	0.42232	0.00306164	1.30339	1.69177			0.444165	11.5069	0.0237079	0.296955	0.391528	4.26666	0.0583807	0.931121	0.797142
19III-7.d	Kaspakas	epithermal	epithermal IS	pyrite	anhedral	24.137	430491	35.8663	54.1909	4.38458	4.34912	0.792805	1.32813	85.5195	2.57927	0.027654	0.126929	0.00974154	0.222882	4.41504	8.33016	0.0313426	0.030906	143.734	11.4923	0.661851	0.0179447	0.0799555	0.419394	0.000215022	0.0307167	0.00077103	0.000192397	0.320422	0.0719134	0.000861699	0.123097	0.00077103			0.290604	10.3462	0.0549864	0.255641	0.249557	4.34912	0.04814	0.434209	0.557319
19III-11.d	Kaspakas	epithermal	epithermal IS	pyrite	subhedral	19.7838	469178	68.2543	38.6177	10.9782	1.68343	0.0253946	1.25735	8776.09	4.2722	0.689012	0.101134	0.00381233	0.100768	4.24116	40.0599	1.58223	0.032782	280.706	15.9647	1.76744	0.0152195	0.0568733	0.0077773	0.000116784	0.0151089	0.0100948	0.00245457	0.2339	0.0625925	0.000480292	0.0621377	0.0100948			0.131322	4.96785	0.0119987	0.130588	0.0971658	1.68343	0.0123166	0.256504	0.309481
19III-12.d	Kaspakas	epithermal	epithermal IS	pyrite	anhedral	17.7379	468512	96.059	76.0745	18.4428	2.52398	0.114079	0.937553	6649.08	4.16577	0.552945	0.0874056	0.00609177	0.194592	14.6601	56.5548	0.610343	0.0725488	371.903	30.0633	1.2627	0.0112012	0.0808365	0.014447	0.000195075	0.0394192	0.00575631	0.0014868	0.312967	0.0433667	0.000755253	0.152616	0.00575631			0.131792	7.61575	0.016747	0.0431241	0.16509	2.52398	0.0150874	0.328408	0.37182
19III-17.d	Kaspakas	epithermal	epithermal IS	pyrite	euhedral	27.7815	452522	31.5252	37.1906	7.28092	3.11505	0.0689097	1.02173	1286.9	1.12348	0.0845671	0.213722	0.00397342	0.665411	2.15562	3.4188	0.413323	0.0282309	129.72	10.8472	0.847667	0.00866078	0.08362	0.0244971	0.00021763	0.0166175	0.00268252	0.00065192	0.344079	0.0356373	0.000895502	0.0683775	0.00268252			0.13445	3.79605	0.0125114	0.209721	0.142349	3.11505	0.0375496	0.184101	0.262692
19III-18.d	Kaspakas	epithermal	epithermal IS	pyrite	subhedral	19.3319	456183	118.418	49.8397	6.0693	2.15987	0.39903	1.1188	663.553	3.18657	0.254087	0.251239	0.00458967	0.119451	12.5307	16.0233	0.759881	0.0392873	226.884	8.0578	2.37598	0.0140449	0.0355151	0.178461	0.00017316	0.0552295	0.00214568	0.0011199	0.0680453	0.0269094	0.000331767	0.105817	0.00214568			0.165637	6.30618	0.0194191	0.0950024	0.108336	2.15987	0.0308776	0.360728	0.335399
19III-20.d	Kaspakas	epithermal	epithermal IS	pyrite	subhedral	19.7418	506170	89.2544	63.314	4.66419	9.66824	0.0541747	1.34882	10663.1	7.23566	0.0473086	0.857814	0.00659418	0.159149	0.196053	2.62964	0.36736	0.0161853	228.014	1.64665	1.40971	0.0317335	0.00722171	0.00837037	7.09839e-05	0.000859828	0.000530042	0.000207481	0.018449	0.0810679	0.000181339	0.00219656	0.000530042			0.339177	8.66292	0.0299131	0.252119	0.233455	4.38099	0.0541747	0.374436	0.415131
19III-21.d	Kaspakas	epithermal	epithermal IS	pyrite	anhedral	83.1637	486366	6.08966	38.5012	322.302	7189.69	3.68755	1.74251	380.547	1.67267	1.33344	66.2826	0.055197	7.57779	4.01098	1.30096	0.042499	0.763847	15029.1	2.75775	0.158168	0.000111296	0.000183494	0.0160024	5.08246e-05	0.000266881	0.218967	8.87239e-05	0.452858	0.274674	0.125433	0.658653	0.218967			0.393851	10.057	0.0208845	0.207375	0.305705	5.25901	0.0346026	0.628617	0.538581
19III-22.d	Kaspakas	epithermal	epithermal IS	pyrite	euhedral	18.1992	485561	78.343	80.4179	340.327	151.486	0.0882698	0.94665	5125.35	1.83556	4.53282	0.513208	2.75765	1.79927	69.7939	28.3104	7.06874	0.0954083	1551.06	21.8325	0.974199	0.00118342	0.0140759	0.0152854	6.15117e-05	0.0449976	0.0578586	0.0029224	0.278678	0.0234297	0.00121783	0.890876	0.0578586			0.175679	6.78009	0.0180726	0.097671	0.140617	2.3797	0.0282515	0.317651	0.40949
19III-23.d	Kaspakas	epithermal	epithermal IS	pyrite	euhedral	27.8629	434100	271.011	62.3264	8.87343	7.28369	0.368661	0.654165	743.332	2.53935	0.162312	0.253895	0.0115314	0.250318	5.7826	6.87697	0.345936	0.16827	242.766	16.6833	4.34825	0.0104601	0.0687218	0.364589	0.000693136	0.0238196	0.000598916	0.000668596	0.0615597	0.00936994	0.000620898	0.0213372	0.000598916			0.241776	5.36443	0.0264688	0.236664	0.221502	2.81898	0.0324805	0.276397	0.473704
19III-24.d	Kaspakas	epithermal	epithermal IS	pyrite	euhedral	17.3464	454672	37.8235	19.1383	9.62808	4.16346	0.0362904	0.993602	5532.1	1.58924	0.150704	0.326239	0.00701791	0.174978	1.30486	16.1118	0.914557	0.00442014	72.7123	9.10129	1.97633	0.0218565	0.125168	0.00683709	6.07894e-05	0.0179456	0.0039844	0.0020726	0.240625	0.0420172	0.000116862	0.0344988	0.0039844			0.238645	5.15598	0.0290568	0.377518	0.246965	4.16346	0.0362904	0.515008	0.526159
19III-27.d	Kaspakas	epithermal	epithermal IS	pyrite	subhedral	49.3903	460849	44.0714	47.8802	12.6642	4.24226	0.881322	1.6937	9926.26	1.10595	0.139261	0.295207	0.00570647	0.0942264	6.14748	0.22627	0.140116	0.101437	134.867	0.507209	0.92045	0.00820032	0.00376081	0.00443988	0.00075213	0.0455818	0.0031599	0.00103258	0.0115088	0.0250946	0.00230166	0.139489	0.0031599			0.170828	5.2803	0.0208272	0.141308	0.11841	4.24226	0.0278639	0.401695	0.340321
19III-28.d	Kaspakas	epithermal	epithermal IS	pyrite	euhedral	16.7812	398203	14.387	23.6521	6.37479	1.69237	0.0441816	0.720717	589.552	2.3392	2.694	0.207334	0.00568282	0.0662256	5.16507	9.28271	0.24134	0.0371956	59.1374	1.10101	0.608276	0.0395554	0.0186178	0.0244033	0.000628969	0.0873401	0.187252	0.0455548	0.076528	0.162592	0.00258536	0.359009	0.187252			0.177934	5.17885	0.0143128	0.113328	0.11649	1.69237	0.0156157	0.205936	0.264476
19III-29.d	Kaspakas	epithermal	epithermal IS	pyrite	subhedral	16.2215	401153	6.23622	4.54839	6.71796	2.12918	0.0370399	0.625644	5785.8	0.801787	0.276026	0.130619	0.00567551	0.097483	0.842941	11.9849	0.509473	0.0253556	636.426	6.58544	1.37108	0.00125983	0.0103475	0.00107785	3.98406e-05	0.00132449	0.0442618	0.000433713	1.056	0.128569	0.00406586	0.135169	0.0442618			0.103877	4.96646	0.0168308	0.107939	0.130907	2.12918	0.0370399	0.297899	0.372654
19III-30.d	Kaspakas	epithermal	epithermal IS	pyrite	subhedral	18.0943	440937	29.2518	25.1345	5.43373	3.298	0.0469123	1.1957	1244.5	1.02786	0.0884808	0.227072	0.00762441	0.404991	17.7572	15.709	0.537193	0.119913	520.38	17.6849	1.16381	0.00197522	0.0339845	0.0235049	0.000230434	0.0341235	0.0030248	0.000170031	0.604573	0.0351385	0.00409934	0.607046	0.0030248			0.177028	5.03985	0.0240963	0.171758	0.190513	3.298	0.0469123	0.304758	0.345897
19III-4.d	Kaspakas	epithermal	epithermal IS	sphalerite	anhedral	3295.51	5819.56	0.0853899	0.198157	1610.13	770632	91.9172	11.1807	0.451457	1.56237	2.83791	5442.22	5.67511	13.8556	0.183082	0.231361	0.0372818	0.00419604	2.00055	0.0142877	0.430921	0.780968	0.00714189	0.189143	0.00209744	0.0915156	33.2348	1.41856	0.167323	18.2969	0.0491398	2.14407	33.2348			0.180824	6.78268	0.0186716	0.198157	0.150133	2.09365	0.0284102	0.183839	0.423106
19III-5.d	Kaspakas	epithermal	epithermal IS	sphalerite	anhedral	2596.72	6922.69	0.0859626	0.0925909	623.169	792401	138.524	9.18127	0.375034	1.43092	1.52015	5821.95	7.53694	14.1329	0.0288919	0.121216	0.0169584	0.00582851	0.416525	0.010898	0.928413	3.43537	0.0261642	0.229213	0.0139932	0.069364	17.6838	3.64959	0.126776	16.6458	0.0678028	0.336098	17.6838			0.136166	6.97801	0.0331	0.0925909	0.142878	2.61315	0.0240726	0.197388	0.27698
19III-8.d	Kaspakas	epithermal	epithermal IS	sphalerite	anhedral	2577.86	7499.84	0.102709	0.166698	3583.44	765398	7.75337	0.423061	0.182871	1.38202	2.83812	5335.03	3.11184	0.959646	0.0676018	0.171697	0.020242	0.00994917	1.84375	0.00969264	0.616139	0.74957	0.00525703	0.56165	0.00539617	0.0366654	27.6326	1.53932	0.0943696	13.4556	0.0968673	0.658186	27.6326			0.194141	5.3399	0.0131582	0.166698	0.132353	2.45924	0.0275697	0.423061	0.182871
19III-9.d	Kaspakas	epithermal	epithermal IS	sphalerite	anhedral	2414.84	7230.07	0.791906	0.155654	1773.88	758703	18.3314	0.33689	0.362266	1.1428	1.57844	5898.08	8.43076	10.3057	0.133751	0.0986796	0.00823263	0.00769345	1.62987	0.0116633	5.08759	0.701159	0.00715593	2.18598	0.00472027	0.0820619	1.99322	0.968443	0.0147281	1.4431	0.0097151	0.168897	1.99322			0.200024	5.84138	0.0157748	0.155654	0.174902	3.69838	0.0374322	0.33689	0.362266
19III-10.d	Kaspakas	epithermal	epithermal IS	sphalerite	anhedral	2306.84	6597.21	0.740782	0.129899	1073.12	754450	5.3757	0.204455	0.329129	0.929097	1.53304	5322.76	2.56336	0.766704	0.111472	0.00112693	0.0152507	0.00572573	0.625902	0.0127193	5.70275	1.48441	0.0203216	2.25074	0.00914797	0.178099	2.06949	2.44933	0.0171701	1.25421	0.0077293	0.150479	2.06949			0.229228	6.26318	0.0258903	0.129899	0.0766262	2.68251	0.0275416	0.204455	0.329129
19III-13.d	Kaspakas	epithermal	epithermal IS	sphalerite	anhedral	3253.83	7226.68	0.0976199	0.156329	2344.44	765378	4.36157	0.329992	0.548268	0.982596	1.77485	5555.59	2.51983	0.278048	0.0225012	0.15491	0.0164463	0.00728021	0.368445	0.0118901	0.624452	2.66688	0.0322711	0.178051	0.0197593	0.0610707	18.1812	4.81714	0.1218	10.0655	0.0745771	0.230498	18.1812			0.287854	7.1297	0.0230132	0.137936	0.12853	2.37205	0.0233368	0.329992	0.548268
19III-14.d	Kaspakas	epithermal	epithermal IS	sphalerite	anhedral	3476.3	5434.25	0.14892	0.162045	777.5	736418	3.96519	0.34766	0.518073	1.69085	1.51407	5569.61	1.22392	15.4173	0.0399564	0.11531	0.0164935	0.00617323	0.420853	0.0107635	0.919003	4.01767	0.0255756	0.28745	0.0146684	0.0949414	10.167	3.59762	0.0722774	11.3541	0.0414534	0.268308	10.167			0.185994	8.6662	0.0238338	0.162045	0.208794	3.27799	0.017726	0.34766	0.518073
19III-15.d	Kaspakas	epithermal	epithermal IS	sphalerite	anhedral	3919.81	5478.86	0.379932	0.170449	2308.68	743823	18.9513	0.180726	0.263969	0.827769	2.44224	5160.4	3.10872	2.09868	0.0218712	0.0897711	0.0151209	0.00759055	1.79585	0.00787962	2.22901	0.460936	0.00438769	1.4393	0.00422673	0.0121788	6.4281	1.35994	0.0207396	2.17873	0.0199787	0.0575662	6.4281			0.116874	5.3103	0.0270387	0.170449	0.174565	2.8099	0.030279	0.180726	0.263969
19III-16.d	Kaspakas	epithermal	epithermal IS	sphalerite	anhedral	2490.59	5466.12	0.0318433	0.172007	236.417	748333	1.0467	0.356421	0.291272	1.1349	0.40771	5006.23	0.23237	0.113285	0.0248995	0.141966	0.0146635	0.0044657	0.480722	0.00650195	0.185128	2.36083	0.0135254	0.109325	0.00928956	0.0517959	12.8036	0.848119	0.204186	35.6402	0.14024	0.781936	12.8036			0.123483	5.36692	0.0189803	0.172007	0.218091	3.76529	0.0229913	0.291494	0.291272
19III-25.d	Kaspakas	epithermal	epithermal IS	sphalerite	anhedral	2557.67	5797.3	0.0770657	0.237707	693.002	734275	4.94563	0.324291	0.331265	1.00057	0.677925	4851.63	0.987503	0.31206	0.0141698	0.0787659	0.0156678	0.00386233	0.645412	0.0068774	0.324205	1.55027	0.0106558	0.23264	0.00598429	0.0219546	8.79671	1.05038	0.0892407	12.9833	0.0501174	0.183866	8.79671			0.150258	3.24638	0.0182955	0.237707	0.155381	2.62105	0.0228494	0.324291	0.331265
19III-26.d	Kaspakas	epithermal	epithermal IS	sphalerite	anhedral	3388.51	5635.57	0.308124	0.193099	2702.8	725364	5.61379	0.277084	0.446003	1.18991	2.00538	4934.19	2.39953	0.183778	0.52121	0.0945384	0.0225883	0.00453039	2.86748	0.0110353	1.59568	0.414969	0.00384843	0.690857	0.00157992	0.181766	6.50833	0.699351	0.0358144	3.8618	0.0147031	1.69156	6.50833			0.202512	5.83841	0.0306145	0.193099	0.170491	2.79525	0.0211412	0.277084	0.446003
19III-31.d	Kaspakas	epithermal	epithermal IS	sphalerite	anhedral	2809.57	5345.68	0.0313087	0.204921	643.683	705502	3.32267	0.276216	0.479958	1.11123	1.23939	4644.93	0.0455036	3.63096	0.0325604	0.105718	0.0165296	0.00669691	1.02192	0.00432012	0.152784	1.0874	0.00422746	0.0652323	0.00655327	0.031862	39.5862	1.21281	0.137984	35.4928	0.213899	1.03998	39.5862			0.203851	4.54687	0.021255	0.204921	0.155673	2.39528	0.0282288	0.276216	0.479958
19III-32.d	Kaspakas	epithermal	epithermal IS	sphalerite	anhedral	2945.04	5009.85	0.0799528	0.186766	296.002	728968	6.68237	0.269889	0.389937	1.42432	0.92895	5087.48	0.358325	0.226706	0.0828194	0.17439	0.00729513	0.00662884	1.91557	0.0118393	0.428092	0.743546	0.00618056	0.20504	0.0034605	0.0432348	11.6187	0.484946	0.148079	17.8145	0.0829095	1.03585	11.6187			0.19441	6.52661	0.0334466	0.186766	0.14756	4.40378	0.0282393	0.269889	0.389937
19III-33.d	Kaspakas	epithermal	epithermal IS	sphalerite	anhedral	3432.77	4888.56	0.13573	0.186959	2292.03	729467	18.8543	0.57564	0.424698	6.06511	2.50666	5404.94	7.87001	5.58469	0.59364	0.114324	0.0262264	0.00862935	10.2557	0.0284419	0.725987	0.591388	0.00277327	0.319591	0.000841418	0.0578838	18.468	0.244416	0.209548	44.6852	0.0635774	4.37369	18.468			0.0974524	7.20526	0.0354685	0.186959	0.188685	3.01458	0.0151561	0.57564	0.424698
19III-19.d	Kaspakas	epithermal	epithermal IS	galena	anhedral	39.1027	12.4408	0.0667111	0.421777	1.33027	7.45282	0.0524033	1.38678	1.22305	197.312	1169.97	276.358	0.0854779	0.412718	962.441	607.581	0.134224	76.044	4.21376e+06	140.918	0.158167	4.68256e-05	3.34423e-05	0.0545448	1.80466e-05	0.000228405	17537.9	0.000277656	2112.36	2957.7	1139.9	14427	17537.9			0.369273	12.4408	0.0667111	0.421777	0.32782	7.45282	0.0524033	1.38678	0.779219
18A-1.d	Kaspakas	epithermal	epithermal IS	pyrite	subhedral, inclusions	16.2122	419020	40.443	58.9654	7.66413	4.05851	0.0392486	0.818753	643.33	3.75743	0.360841	0.141273	0.00384578	0.0988256	4.81477	7.65236	0.136293	0.015185	95.9651	0.159742	0.685877	0.0391541	0.00166458	0.062865	0.000158234	0.0501721	0.00892222	0.00376013	0.0039498	0.0929068	0.000375466	0.119051	0.00892222			0.155584	3.6716	0.0194649	0.150468	0.133772	1.80867	0.0258226	0.415105	0.332781
18A-3.d	Kaspakas	epithermal	epithermal IS	pyrite	subhedral, inclusions	64.8963	457369	93.2847	20.3498	12.5558	2.51394	1.12134	1.09126	350.978	0.669754	0.127201	0.190733	0.00770391	0.0950015	8.13335	2.66082	0.0240612	0.220991	248.834	0.22091	4.58407	0.00269157	0.000887782	0.265785	0.000888105	0.0326859	0.00136357	0.000511187	0.00236813	0.00717968	0.00236899	0.0871885	0.00136357			0.179351	6.73962	0.0202027	0.170207	0.138192	2.38666	0.0148754	0.180544	0.267328
18A-4.d	Kaspakas	epithermal	epithermal IS	pyrite	subhedral, inclusions	16.7175	400922	25.2708	59.3561	7.32531	1.5212	0.26976	0.900357	883.478	2.98376	0.386287	0.232868	0.00621235	0.293159	13.5172	15.3056	0.116044	0.2439	111.753	2.30145	0.42575	0.0266996	0.0205941	0.0286038	0.00218249	0.120956	0.0152859	0.0034566	0.0910716	0.118071	0.00965145	0.534894	0.0152859			0.214764	6.81906	0.0157441	0.165924	0.114358	1.5212	0.0297186	0.173084	0.376585
18A-5.d	Kaspakas	epithermal	epithermal IS	pyrite	euhedral	18.8573	397562	22.1826	135.366	1.60502	3.03007	0.345193	0.913514	151.868	5.02304	0.0219385	0.215887	0.0087155	0.127806	0.214275	5.43661	0.0184628	0.0112861	4.74951	0.0855476	0.163871	1.05759	0.0180119	0.146065	0.00237627	0.0451151	0.000988995	0.00461911	0.00385651	0.22644	0.000508782	0.00965957	0.000988995			0.19001	7.66976	0.0304985	0.154905	0.171226	3.03007	0.0295535	0.527106	0.248681
18A-8.d	Kaspakas	epithermal	epithermal IS	pyrite	subhedral	17.6541	422950	13.4639	63.7037	0.545205	2.23724	0.0283142	0.711159	213.422	2.56633	0.0164692	0.0808933	0.00672451	0.0867483	0.171249	2.9653	0.00204899	0.00692729	3.50666	0.0519671	0.211352	0.731845	0.0148195	0.063086	0.00197547	0.0488355	0.00122321	0.00469655	0.00385972	0.190608	0.000514507	0.0127191	0.00122321			0.146643	4.07326	0.0142211	0.0467236	0.0841712	2.23724	0.0184291	0.342034	0.241208
18A-9.d	Kaspakas	epithermal	epithermal IS	pyrite	subhedral	31.2505	455153	5.53713	26.7587	54.191	18.0899	0.47435	1.20722	1413.04	2.43811	0.716303	0.779327	0.0172296	0.222209	41.4623	3.02577	0.0142124	0.282971	663.21	0.434435	0.206928	0.00367623	0.000655049	0.00391859	0.000426669	0.0625176	0.129364	0.00108005	0.0784586	0.44032	0.0511043	7.48805	0.129364			0.375744	10.437	0.0364397	0.119725	0.215521	5.73169	0.0472208	0.876463	0.618012
18A-11.d	Kaspakas	epithermal	epithermal IS	pyrite	subhedral	17.764	412292	4.13828	14.069	39.3901	4.01205	1.71905	7.00519	1549.76	4.44253	0.674536	0.157196	0.0084371	0.136735	122.603	6.01019	0.00375466	0.140007	712.226	1.41596	0.294141	0.00623753	0.00198808	0.00267027	0.000196577	0.172141	0.162999	0.000947081	0.342162	1.07352	0.0338323	29.6267	0.162999			0.300139	7.51933	0.0284941	0.2831	0.175348	4.01205	0.0438527	0.35646	0.325139
18A-12.d	Kaspakas	epithermal	epithermal IS	pyrite	subhedral	40.5325	439493	28.7443	154.347	301.62	5.43972	0.686923	0.837624	723.348	1.8804	2.594	0.647525	0.0154993	0.157515	43.3061	4.2911	0.146628	0.345449	281.533	0.49503	0.186232	0.00667916	0.00175834	0.0397379	0.00122703	0.153822	0.0902438	0.00921382	0.0172219	0.0654183	0.012018	1.5066	0.0902438			0.345802	8.66335	0.0328297	0.326178	0.201955	4.62212	0.0505245	0.410708	0.374595
18A-13.d	Kaspakas	epithermal	epithermal IS	pyrite	subhedral, inclusions	60.2055	398646	6.54085	15.112	9.4173	7.91251	3.05276	10.2453	473.05	4.42317	0.238065	0.470559	0.0110842	0.159715	10.4005	5.83121	0.0387679	0.0324933	47.2773	0.142898	0.432826	0.0935581	0.00302255	0.013827	0.000687291	0.21999	0.0363966	0.0050355	0.021847	0.676238	0.00496774	1.59009	0.0363966			0.234895	11.0495	0.0567898	0.322891	0.256481	3.07789	0.0311391	0.325742	0.558187
18A-14.d	Kaspakas	epithermal	epithermal IS	pyrite	subhedral, inclusions	35.4786	438250	2103.76	323.758	148.317	439.001	0.0563179	0.854663	6107.78	2.18507	1.72819	1.77716	0.0522997	0.162305	108.146	28.8053	1.00134	0.129826	2431.64	138.347	6.49795	0.000898603	0.0568945	0.344439	5.33904e-05	0.0444745	0.000821478	0.000710712	0.0657616	0.00103865	6.17113e-05	0.0514059	0.000821478			0.280985	9.93255	0.0428884	0.182326	0.278513	3.17268	0.0563179	0.854663	0.642529
18A-16.d	Kaspakas	epithermal	epithermal IS	pyrite	subhedral, inclusions	23.145	389243	58.1309	2.66678	3.39109	2.02641	0.0945491	0.776746	321.815	0.649144	0.0430639	0.105081	0.00617423	0.0944038	3.72239	1.14434	0.0190582	0.0516483	73.1921	0.046935	21.7982	0.00886905	0.000641257	0.180634	0.000705653	0.0508578	0.00074081	0.000588368	0.000807402	0.011167	0.000888483	0.0640346	0.00074081			0.128291	3.7034	0.0127182	0.131849	0.0841206	2.02641	0.0433114	0.362064	0.227205
18A-18.d	Kaspakas	epithermal	epithermal IS	pyrite	subhedral, inclusions	18.1159	419986	2352.73	57.2643	6.99972	2.40615	0.0407236	0.698606	4834.23	1.1442	0.0833927	0.145726	0.0087552	0.0802359	8.06209	6.41754	0.0527642	0.00906841	63.8998	0.284255	41.0854	0.0179062	0.00444844	0.486681	0.000141916	0.126168	3.54451e-05	0.00130505	0.000120819	0.000486329	3.85443e-06	0.0034267	3.54451e-05			0.149985	4.51862	0.0278514	0.109003	0.117003	2.40615	0.0407236	0.166379	0.213251
lem6-1.d	Kaspakas	epithermal	epithermal IS overprinting sericitic	pyrite	anhedral, inclusions	19.206	381458	42.6303	34.2535	1.01528	3.766	0.0627817	0.568554	76.2029	5.19358	0.031022	0.209637	0.00964346	0.155891	0.0890069	0.671489	0.0350009	0.0158764	5.42002	0.971392	1.24456	0.958222	0.179223	0.559432	0.00292921	0.0164219	0.000727697	0.00572359	0.0227864	0.121828	0.000372419	0.00208788	0.000727697			0.276887	8.69269	0.0509732	0.346875	0.16328	3.766	0.0627817	0.422502	0.273331
LEM6-3.d	Kaspakas	epithermal	epithermal IS overprinting sericitic	pyrite	anhedral, inclusions	18.7053	381805	2.83587	41.3201	0.577212	4.42079	0.0569701	0.637847	5.8132	5.96136	0.0279493	0.240571	0.0124323	0.180777	0.0650475	0.652868	0.0710917	0.00895341	0.304181	0.0618218	0.0686316	19.5981	0.20324	0.487832	0.0294345	0.213845	0.00985565	0.0918839	0.0217999	2.10213	0.0031572	0.0229374	0.00985565			0.389086	9.4385	0.0308195	0.339336	0.281146	4.42079	0.0569701	0.637847	0.443904
LEM6-5.d	Kaspakas	epithermal	epithermal IS overprinting sericitic	pyrite	anhedral, inclusions	17.6148	389002	19.2219	59.139	0.286267	2.85615	0.0535404	0.659985	38.8792	6.7421	0.0230096	0.276757	0.0141529	0.101529	0.0317846	0.984301	0.0277939	0.0125163	1.1309	0.426752	0.325029	5.96174	0.377357	0.4944	0.0110676	0.0281057	0.00119705	0.0203463	0.0222014	0.350752	0.000651147	0.00165356	0.00119705			0.31191	11.2865	0.0332236	0.186502	0.286267	2.85615	0.0535404	0.592009	0.38447
LEM6-6a.d	Kaspakas	epithermal	epithermal IS overprinting sericitic	pyrite	anhedral, inclusions	248.192	419362	162.034	25.8723	17.5887	3.28941	1.36461	0.510429	6.05651	11.8195	0.0738677	0.133305	0.0467736	0.105703	0.0337615	2.91813	0.0347951	0.0978902	31.2489	14.0011	6.26283	0.378239	0.448051	26.7537	0.0031326	0.00108041	0.000455877	0.00236385	0.0864083	0.0729446	0.000604133	0.000208361	0.000455877			0.285561	4.92484	0.0257069	0.147324	0.19221	3.28941	0.0262974	0.510429	0.151271
LEM6-7.d	Kaspakas	epithermal	epithermal IS overprinting sericitic	pyrite	anhedral, inclusions	30.614	402691	19.7195	49.5234	0.73655	3.2892	0.067149	0.992663	10.5571	6.51136	0.0165049	0.125494	0.00497621	0.0826352	0.0507368	0.298656	0.021339	0.0139517	8.07992	5.64091	0.398187	0.805869	0.698139	1.8679	0.00172671	0.00627937	0.000836983	0.00204271	0.286057	0.330198	0.000707505	0.00257292	0.000836983			0.373043	7.24167	0.045549	0.245922	0.201587	3.2892	0.0511032	0.518704	0.351072
LEM6-8.d	Kaspakas	epithermal	epithermal IS overprinting sericitic	pyrite	anhedral, inclusions	47.1547	423782	78.6526	30.9368	6.59313	3.76534	0.506248	3.20957	18.9724	17.0216	0.0188912	0.143641	0.00569686	0.0945902	0.0336818	0.341866	0.0244346	0.0274889	6.73556	4.49007	2.54237	2.52712	0.666622	4.14564	0.00408117	0.00500059	0.000240186	0.0028047	0.0570874	0.216415	0.000349498	0.000428235	0.000240186			0.427073	8.29056	0.0521469	0.281547	0.230707	3.76534	0.0585049	0.593856	0.40191
LEM6-9.d	Kaspakas	epithermal	epithermal IS overprinting sericitic	pyrite	anhedral, inclusions	22.3324	444704	82.1932	59.1775	3.994	11.1637	2.77447	0.755254	69.9428	3.34158	0.278448	0.279906	0.00629591	0.196924	0.0916038	0.635754	0.0347855	0.173951	228.968	1.73276	1.38893	0.0145941	0.00756773	1.17515	0.00075972	0.000400073	0.00338773	0.0012161	0.0210816	0.0406552	0.00211637	0.00111449	0.00338773			0.316896	10.8843	0.0530664	0.36039	0.200368	5.39108	0.0661324	0.755254	0.723853
LEM6-10.d	Kaspakas	epithermal	epithermal IS overprinting sericitic	pyrite	anhedral, inclusions	48.4283	415400	712.165	78.1822	3.52537	3.72622	0.437096	0.570841	182.928	5.05861	0.0302557	0.168853	0.00658703	0.214793	0.0278107	0.953974	0.0316259	0.0151827	11.6898	3.89292	9.10904	0.432737	0.333019	3.89314	0.0012988	0.00237905	4.24842e-05	0.00258822	0.00546632	0.00710314	2.1319e-05	3.90509e-05	4.24842e-05			0.219237	6.01761	0.0337987	0.506552	0.172552	3.72622	0.0431791	0.570841	0.594534
LEM6-11.d	Kaspakas	epithermal	epithermal IS overprinting sericitic	pyrite	anhedral, inclusions	211.546	393683	23.1148	36.4718	3.45401	11.5988	0.938921	0.621048	1.04598	36.4133	0.0376886	0.260397	0.0122877	0.135628	0.0448336	0.348789	0.000727167	0.0452087	29.5376	9.4658	0.633772	1.23278	0.320466	22.0988	0.00153055	0.00151785	0.0016305	0.00127595	0.409512	1.57532	0.00195583	0.0019396	0.0016305			0.326257	12.005	0.0359338	0.260013	0.189046	4.89145	0.0627389	0.479201	0.377439
LEM6-12.d	Kaspakas	epithermal	epithermal IS overprinting sericitic	pyrite	anhedral, inclusions	34.537	458790	137.681	73.9701	2.41829	13.748	0.201603	0.986809	267.517	10.6731	0.15552	0.00257922	0.00586913	0.211473	0.113318	0.980868	0.0555147	0.0422284	284.09	8.19719	1.8613	0.0375695	0.0288542	0.514662	0.000148645	0.000398882	0.00112957	0.000547432	0.0595378	0.077521	0.000306713	0.000823053	0.00112957			0.303688	5.47488	0.0394317	0.27274	0.343544	4.19956	0.0611514	0.687851	0.816562
LEM6-13.d	Kaspakas	epithermal	epithermal IS overprinting sericitic	pyrite	anhedral, inclusions	19.6351	444751	315.096	48.8791	2.32261	3.30151	0.389012	1.11197	299.507	2.18028	0.0205493	0.238788	0.00615677	0.203862	0.305236	4.211	0.0449624	0.0244834	11.9527	6.01706	6.44644	0.18241	0.503407	1.05205	0.00204836	0.0255371	6.5216e-05	0.00171923	0.0190959	0.00691941	7.77012e-05	0.000968707	6.5216e-05			0.331334	10.9556	0.0386425	0.385845	0.283421	3.30151	0.0797998	0.680133	0.578664
LEM6-15.d	Kaspakas	epithermal	epithermal IS overprinting sericitic	pyrite	anhedral, inclusions	22.2563	401108	414.022	9.30606	5.32785	3.04139	0.472079	0.264061	8.56196	12.2755	22.0293	0.0586404	0.00812464	0.103656	0.675552	2.49558	0.0333745	0.137265	2442.74	17.4776	44.4895	0.00502532	0.00715493	48.356	5.6193e-05	0.000276555	0.0532081	0.00901829	0.0422143	0.0296495	0.00033154	0.00163168	0.0532081			0.228089	4.32416	0.0172396	0.201368	0.092191	3.04139	0.0421184	0.244095	0.361778
LEM6-16.d	Kaspakas	epithermal	epithermal IS overprinting sericitic	pyrite	anhedral, inclusions	19.5424	415322	35.3285	32.8129	1.23898	2.37333	0.0334198	0.508118	84.3484	15.2463	11.4879	0.116008	0.00689419	0.0617372	0.238548	2.4707	0.0130499	0.147989	5996.3	30.4749	1.07666	0.00254261	0.00508229	0.41884	2.468e-05	3.97825e-05	0.325174	0.00191583	0.862617	0.431557	0.00418894	0.00675229	0.325174			0.189402	4.47731	0.0233654	0.167336	0.10672	2.37333	0.0334198	0.330019	0.243071
LEM6-17.d	Kaspakas	epithermal	epithermal IS overprinting sericitic	pyrite	anhedral, inclusions	24.6153	444525	232.446	41.1202	12.2617	5.50293	2.11246	0.627145	732.873	2.86948	0.715321	0.268635	0.00803034	0.608072	26.2273	3.65254	0.0253729	0.273727	381.07	6.74405	5.65284	0.00753006	0.0176977	0.317171	0.000718312	0.0688255	0.00307736	0.00187714	0.0290134	0.0123447	0.00117759	0.112832	0.00307736			0.287896	12.9705	0.0597852	0.403845	0.196632	5.50293	0.0625802	0.627145	0.466753
LEM6-18.d	Kaspakas	epithermal	epithermal IS overprinting sericitic	pyrite	anhedral, inclusions	612.93	435406	240.321	36.7878	24.2209	3.18248	0.489766	0.877036	111.748	3.26933	71.494	0.791745	0.00916324	0.199996	0.26873	32.2555	0.274505	0.0367186	602.178	15.9996	6.53262	0.00542917	0.0265696	2.15056	6.09763e-05	0.000446263	0.297494	0.118726	0.0665762	0.013604	0.00015279	0.00111821	0.297494			0.309636	8.29146	0.0377778	0.309471	0.307102	3.18248	0.0530144	0.474906	0.43053
LEM6-19.d	Kaspakas	epithermal	epithermal IS overprinting sericitic	pyrite	anhedral, inclusions	27.5636	429897	87.9673	180.789	7.60061	4.62858	1.081	0.53143	464.684	3.21606	0.0553802	0.0797525	0.00633457	0.286729	2.83142	7.13547	0.125641	0.0166226	85.4268	40.0675	0.486575	0.0376469	0.469027	0.189306	0.000194583	0.0331443	0.000629554	0.000648277	0.455481	0.0365597	0.000188963	0.0321871	0.000629554			0.204994	8.89236	0.0341584	0.269376	0.226436	4.62858	0.0398011	0.460034	0.283835
LEM6-2.d	Kaspakas	epithermal	epithermal IS overprinting sericitic	sphalerite	subhedral	240.56	1897.66	13.0479	0.41402	519.248	693329	6.20656	0.650292	0.476698	7.08825	26.8724	4455.22	43.6222	20.7909	4.11535	6.68203	1.20853	0.0133324	16.3672	11.7003	31.515	0.433076	0.71486	27.3713	0.000814577	0.251438	2.05953	1.64184	0.896721	0.54325	0.00102181	0.315404	2.05953			0.476111	7.85706	0.0379405	0.41402	0.238867	4.98733	0.0519697	0.650292	0.476698
7II-2.d	Kaspakas	porphyry	sericitic	pyrite	anhedral, inclusions	17.1867	366280	22.0145	284.164	0.469623	6.8023	0.0804775	0.803367	179.1	9.91503	0.0339871	0.792308	0.0129965	0.196308	0.07085	10.1003	0.0993451	0.0194091	0.59208	1.80775	0.0774708	16.7461	3.05322	0.122917	0.0327813	0.119663	0.00154386	0.057403	0.0821165	0.450387	0.000881654	0.00321834	0.00154386			0.306161	9.63994	0.0349796	0.372333	0.321869	6.8023	0.0504309	0.515492	0.861196
7II-3.d	Kaspakas	porphyry	sericitic	pyrite	anhedral	30.202	253855	56.5703	582.498	676.931	95.522	10.4796	8.79589	411.175	29.6147	8.86469	7.40086	0.159044	22.7659	2.37419	3874.93	8.53016	0.580216	2553.91	423.532	0.0971167	0.0115958	0.165837	0.137582	0.000227188	0.00092963	0.156702	0.00347103	7.48682	0.523503	0.0102566	0.0419689	0.156702			5.33073	155.681	0.596604	4.61237	4.02676	95.522	0.945917	8.79589	7.84078
7II-4.d	Kaspakas	porphyry	sericitic	pyrite	anhedral	15.9247	337060	14.623	471.573	0.146815	3.25313	0.0266831	0.613711	4.01109	65.0285	0.0122086	0.288458	0.00399772	0.0724499	0.0173322	0.257824	0.0104373	0.0102614	0.464014	0.0734049	0.031009	140.143	0.158195	3.64565	0.0221144	0.0373527	0.000834891	0.0263109	0.00501982	4.447	0.00070173	0.00118527	0.000834891			0.194082	5.39127	0.0352171	0.219499	0.146815	3.25313	0.0266831	0.35194	0.38923
7II-5.d	Kaspakas	porphyry	sericitic	pyrite	anhedral	16.8956	339350	8.64947	1556.59	0.176836	2.17644	0.0340307	0.724317	5.53907	86.3151	0.00683184	0.17484	0.00383381	0.0949082	0.00687929	0.127828	0.0158315	0.00484318	0.769989	0.00842591	0.00555668	112.099	0.0109429	1.56154	0.00628994	0.00893427	0.000789856	0.00887265	0.000974153	9.97923	0.000559939	0.000795342	0.000789856			0.154944	5.34154	0.022544	0.169639	0.136105	2.17644	0.0340307	0.452646	0.346936
7II-6.d	Kaspakas	porphyry	sericitic	pyrite	anhedral	17.9651	361864	100.301	2.31432	0.182072	1.61655	0.0317964	0.793492	2.01106	28.4076	0.0258478	0.315144	0.00913861	0.091885	0.0460518	0.442577	0.0131244	0.00791241	1.34472	0.102717	43.3394	21.1253	0.0763852	49.8749	0.00588407	0.0342464	0.000257702	0.0192217	0.00102408	0.283223	7.88866e-05	0.000459136	0.000257702			0.222327	5.5983	0.0204861	0.144013	0.182072	1.61655	0.0317964	0.42018	0.327486
7II-8.d	Kaspakas	porphyry	sericitic	pyrite	anhedral, inclusions	17.195	364356	83.3732	21.0143	0.586077	3.93614	0.0353946	0.548262	1.75797	60.5757	0.0137731	0.267319	0.00384246	0.0644432	0.019901	2.43185	0.0508844	0.00486245	1.31758	1.39538	3.96745	45.9751	1.05905	47.4258	0.00369045	0.0151043	0.000165198	0.0104533	0.0167366	0.726561	5.83215e-05	0.000238698	0.000165198			0.160645	7.64754	0.0268793	0.178805	0.138321	3.93614	0.0353946	0.268119	0.30311
7II-9.d	Kaspakas	porphyry	sericitic	pyrite	anhedral	17.8935	369844	105.343	325.956	3.00807	2.95281	0.278796	1.1336	35.6856	40.2253	0.241114	0.243511	0.0084518	0.118108	0.771153	34.2857	0.390813	0.0102242	60.5677	10.2074	0.323184	0.664138	0.168529	2.95199	0.000168805	0.0127321	0.00228884	0.0039809	0.0968965	0.381849	9.70555e-05	0.00732037	0.00228884			0.170538	5.9497	0.0112942	0.222819	0.125807	2.95281	0.0234703	0.291796	0.259034
7II-10.d	Kaspakas	porphyry	sericitic	pyrite	anhedral, inclusions	16.5878	352247	128.766	18.1146	0.189963	3.14566	0.02677	0.694559	1.5779	29.2946	0.010463	0.253728	0.00461339	0.0767061	0.0223054	0.0837205	0.0120538	0.00703725	0.0495859	0.00933929	7.10842	590.785	0.188346	81.6062	0.14192	0.449833	8.12553e-05	0.211007	7.25289e-05	0.227502	5.46513e-05	0.000173223	8.12553e-05			0.112585	5.6944	0.022479	0.210639	0.189963	3.14566	0.02677	0.344483	0.228931
7II-11.d	Kaspakas	porphyry	sericitic	pyrite	anhedral, inclusions	49.2419	844876	0.393272	6564.98	1.28794	44.7142	0.276586	7.06864	6.50428	151.8	0.235826	4.33454	0.272226	1.50582	0.307959	1.67796	0.237002	0.0896169	3.85625	1.75049	5.99045e-05	39.3647	0.453936	0.0604636	0.0232394	0.0798598	0.599651	0.0611543	4.45109	385.992	0.227875	0.783069	0.599651			2.7082	94.6628	0.393272	1.23469	1.28794	44.7142	0.276586	7.06864	6.50428
7II-12.d	Kaspakas	porphyry	sericitic	pyrite	anhedral, inclusions	15.4773	304406	364.273	165.987	0.92134	11.3619	0.160474	0.900134	1.49652	30.044	0.118303	0.717742	0.0308288	1.37786	0.0897073	4.79403	0.114638	0.0242661	110.432	4.90485	2.19459	0.272059	0.0444151	243.413	0.000219739	0.000812331	0.000324764	0.00107127	0.0134648	0.0824765	6.66153e-05	0.000246264	0.000324764			0.616464	18.7235	0.0769828	0.405226	0.725852	11.3619	0.160474	0.900134	1.49652
3BII-2.d	Kaspakas	porphyry	sericitic	pyrite	anhedral, inclusions	20.4137	371994	16.175	26.254	12.98	2.42986	0.163521	0.64066	1.54798	21.0561	0.0195596	0.274891	0.00847385	0.129686	0.351812	1.15578	0.0404018	0.0296762	27.535	1.97188	0.616095	0.764701	0.0716135	10.4491	0.00107776	0.0127769	0.00120925	0.000710353	0.121909	1.30177	0.0018347	0.0217504	0.00120925			0.156383	5.32235	0.0204428	0.0927747	0.19833	2.42986	0.0437245	0.478505	0.256084
3BII-3.d	Kaspakas	porphyry	sericitic	pyrite	anhedral	39.6191	354017	16.3391	5.24618	6.12717	2.62811	0.214071	0.691473	400.899	76.8257	1.0159	0.138828	0.00762665	0.323208	0.169079	2.33504	0.0625904	0.0939003	15.3027	4.31469	3.11448	5.02042	0.281957	0.0407562	0.00613621	0.011049	0.062176	0.0663873	0.264071	4.70195	0.00574696	0.0103481	0.062176			0.222145	5.27172	0.0131883	0.181483	0.164354	2.62811	0.0354171	0.364335	0.355709
3BII-4.d	Kaspakas	porphyry	sericitic	pyrite	anhedral	18.3402	380364	153.372	6.43224	1.0091	2.14465	0.143318	0.562136	140.741	191.158	0.00938669	0.130366	0.00967525	0.130578	3.58134	2.27261	0.496252	0.0301569	201.516	0.0726677	23.8442	0.948602	0.000360606	1.08974	0.00014965	0.017772	6.12023e-05	4.65804e-05	0.000473802	1.24637	0.000196626	0.0233508	6.12023e-05			0.165285	7.19591	0.0286501	0.201737	0.189306	2.14465	0.0558758	0.388307	0.332563
3BII-5.d	Kaspakas	porphyry	sericitic	pyrite	anhedral, inclusions	27.791	399395	27.03	16.7722	0.296954	1.93646	0.159503	0.28323	59.3498	149.127	0.0274678	0.211386	0.00873867	0.158555	0.0296924	0.409032	0.0253098	0.0732868	7.33851	0.498246	1.61159	20.3212	0.0678948	0.455435	0.0099866	0.00404611	0.0010162	0.00374297	0.0184331	5.51711	0.00271132	0.0010985	0.0010162			0.154228	6.29128	0.0427233	0.281063	0.126011	1.93646	0.029425	0.207706	0.460914
3BII-6.d	Kaspakas	porphyry	sericitic	pyrite	anhedral, inclusions	52.5812	378647	48.4068	59.212	33.7555	2.28025	0.942764	0.606463	23.6089	35.4606	0.0247054	0.151192	0.00834091	0.507297	0.385778	5.3275	0.0821792	0.22822	35.0596	4.40622	0.817517	1.01144	0.125678	2.05036	0.0065095	0.0110035	0.00051037	0.000704669	0.0910247	0.732553	0.00471463	0.0079695	0.00051037			0.112878	4.03527	0.0244309	0.1702	0.166302	2.20229	0.0284135	0.213393	0.334933
3BII-7.d	Kaspakas	porphyry	sericitic	pyrite	subhedral	17.3289	360338	20.0659	14.0414	22.3208	2.31901	0.488275	0.65614	12.5974	37.9785	0.13757	0.182943	0.0125902	0.36801	33.67	1.05706	0.143018	0.171079	707.37	1.51036	1.42905	0.0536897	0.00213517	1.59285	0.000241852	0.0475988	0.00685594	0.000194482	0.0752699	1.89269	0.00852585	1.67797	0.00685594			0.199337	9.60902	0.0270658	0.179492	0.347543	2.31901	0.0200154	0.397506	0.37292
3BII-8.d	Kaspakas	porphyry	sericitic	pyrite	anhedral	17.3125	365203	36.2096	27.8208	42.8234	2.03214	0.0714218	0.861869	1.93368	17.9164	0.0913642	0.18332	0.0103392	0.0997623	3.81928	0.25204	0.152848	0.165761	72.3295	0.531314	1.30153	0.247706	0.00734575	18.7257	0.00229175	0.052804	0.0025232	0.00126317	0.0146733	0.494798	0.00457782	0.105477	0.0025232			0.115462	4.99074	0.0125503	0.226938	0.247273	2.03214	0.0712466	0.343205	0.327011
3BII-9.d	Kaspakas	porphyry	sericitic	pyrite	anhedral, inclusions	16.7233	361613	14.4297	5.18692	74.8925	2.58053	0.0248877	0.667774	0.310999	58.5105	0.0122296	0.125386	0.00529721	0.099151	0.017663	0.20482	0.013772	0.00291421	0.293803	0.214507	2.78194	199.149	0.730106	46.3979	0.00991891	0.0601187	0.000847529	0.0416251	0.0148657	4.05486	0.000201959	0.00122408	0.000847529			0.161775	7.04376	0.0122868	0.13233	0.142234	2.58053	0.017078	0.352676	0.310999
3BII-1.d	Kaspakas	porphyry	sericitic	chalcopyrite	subhedral	20.0458	396950	0.430738	1.76723	439413	149.19	0.842338	3.30544	4.72911	89.9107	4.2985	13.4505	11.9001	1.04809	0.172889	1.23554	1.05774e-05	0.0847271	9.93119	0.303143	0.243737	9.05337	0.0305243	0.0910822	0.00853141	0.0174087	9.97939	0.432829	0.703776	208.736	0.196702	0.401379	9.97939			1.11705	36.7684	0.321396	1.76723	1.10055	14.0673	0.257008	3.30544	4.72911
lem1a-1.d	Kaspakas	porphyry	sericitic	pyrite	anhedral, inclusions	36.454	380923	36.4275	22.8121	32.67	2.67754	0.156636	0.904246	144.434	125.236	1.87966	0.151227	0.00533312	3.0537	4.27264	28.3869	0.126384	0.127766	277.477	30.2668	1.59685	0.451339	0.109078	0.252209	0.000460457	0.0153982	0.0516001	0.00677411	0.830878	3.43797	0.00350742	0.117292	0.0516001			0.207676	3.98497	0.0132389	0.127049	0.183379	2.67754	0.0497263	0.322633	0.360144
LEM1A-5.d	Kaspakas	porphyry	sericitic	pyrite	anhedral, inclusions	17.8577	383307	155.429	17.1641	0.391831	1.19954	0.0206625	0.528115	4.60528	68.0209	0.00667818	0.0977033	0.00289008	0.0704161	0.0225307	0.441458	0.00755034	0.00367287	3.69717	0.590392	9.05546	18.3981	0.159688	33.7501	0.000993429	0.00609404	4.29663e-05	0.0018063	0.00379848	0.437634	2.36306e-05	0.000144959	4.29663e-05			0.131707	5.07148	0.0160237	0.126427	0.126226	1.19954	0.0206625	0.317267	0.227479
LEM1A-6.d	Kaspakas	porphyry	sericitic	pyrite	anhedral, inclusions	17.3875	378999	68.6121	11.9443	0.50127	1.28182	0.0351666	0.392485	2.82315	94.1196	0.0121941	0.114804	0.00390493	0.25595	0.00830118	0.171668	0.0150923	0.00945306	5.8474	1.01966	5.74432	16.096	0.174378	24.3034	0.00161663	0.00141964	0.000177725	0.00208538	0.0148612	1.37176	0.000137775	0.000120987	0.000177725			0.0979931	3.82134	0.0175588	0.194341	0.116024	1.28182	0.0351666	0.333586	0.18163
LEM1A-7.d	Kaspakas	porphyry	sericitic	pyrite	anhedral, inclusions	17.8544	382908	63.592	3.31911	0.100311	1.44817	0.0352704	0.365886	1.03118	62.2686	0.00669581	0.0889566	0.00907493	0.0568397	0.0233455	0.126769	0.020946	0.00636657	2.16823	0.0871029	19.1594	28.7186	0.0401722	61.6691	0.00293629	0.0107671	0.000105293	0.00308814	0.00136971	0.97919	0.000100116	0.000367114	0.000105293			0.122187	4.48204	0.0190129	0.146361	0.0905612	1.44817	0.0352704	0.275958	0.255399
LEM1A-8.d	Kaspakas	porphyry	sericitic	pyrite	anhedral, inclusions	16.9655	360387	34.1756	0.675824	0.314803	2.13118	0.0300447	0.492758	0.612873	61.1912	0.0081052	0.167014	0.00637733	0.0621631	0.0101006	0.198049	0.012201	0.00438227	6.63064	0.335709	50.5688	9.22856	0.0506299	55.7629	0.000660913	0.00152332	0.000237163	0.00122239	0.00982306	1.7905	0.000128228	0.000295549	0.000237163			0.113739	3.28058	0.0259361	0.170098	0.118823	2.13118	0.0300447	0.173817	0.263787
LEM1A-3.d	Kaspakas	porphyry	sericitic	pyrite	anhedral, inclusions	17.8016	396080	49.3948	0.431889	0.124858	1.06079	0.0269019	0.632047	3.59286	104.814	0.00836224	0.115046	0.00361111	0.0631923	0.0318376	0.733217	0.0144239	0.0075792	2.1524	0.00472845	114.369	48.6964	0.00219683	13.748	0.00352128	0.0147917	0.000169294	0.00388507	9.57279e-05	2.12197	0.000153441	0.000644554	0.000169294			0.13488	3.7645	0.0199618	0.160803	0.124858	1.06079	0.0269019	0.401287	0.26363
LEM1A-4.d	Kaspakas	epithermal	sericitic	pyrite	anhedral, inclusions	191.875	376576	252.785	91.8508	4.67677	50.0292	4.99858	0.631509	7.63019	48.4053	0.0423442	0.20859	0.0158525	0.119355	0.0870019	2.91858	0.0115794	0.0210648	32.0322	6.8294	2.75212	1.51115	0.213204	33.1295	0.000657615	0.00271608	0.000167511	0.00132193	0.0270167	0.191488	8.33312e-05	0.000344174	0.000167511			0.174322	4.6299	0.0359599	0.157374	0.189452	1.9157	0.02438	0.631509	0.297979
LEM8I-1.d	Kaspakas	epithermal	sericitic	pyrite	anhedral, inclusions	35.8221	337860	327.592	375.349	2.90704	47.6309	4.0188	8.03895	76.001	173.346	0.233332	3.94495	0.409625	22.4099	0.340518	23.0298	0.193956	0.24412	126.81	3.608	0.872765	1.36697	0.028452	4.31036	0.00192508	0.00268525	0.000712265	0.00184001	0.0110137	0.529154	0.000745197	0.00103946	0.000712265			3.19354	122.014	0.368509	3.36165	2.25782	47.6309	0.587485	8.03895	6.48746
LEM8I-2.d	Kaspakas	epithermal	sericitic	pyrite	anhedral, inclusions	36.609	377195	21.8636	17.2569	16.522	2.99282	0.269764	0.300994	11.4492	52.0877	3.23145	0.183382	0.00353677	0.0640749	0.0752579	5.71353	0.118994	0.00655682	66.553	4.05638	1.26695	0.78265	0.0609497	1.90962	9.85204e-05	0.0011308	0.147801	0.0485546	0.185531	2.38239	0.000299897	0.00344216	0.147801			0.0938412	5.84805	0.0401267	0.0645754	0.124996	1.08854	0.014651	0.290657	0.241778
LEM8I-3.d	Kaspakas	epithermal	sericitic	pyrite	euhedral, inclusions, dissolution	20.9707	364182	11.1302	5.98599	0.273652	1.81411	0.0228699	0.590611	8.09342	49.8842	0.0312835	0.0862834	0.00551626	0.079743	0.012381	0.83408	0.014315	0.00567572	8.06102	4.21717	1.85938	6.18832	0.523156	1.37522	0.000704094	0.00153591	0.00281068	0.00388083	0.378894	4.48187	0.000509938	0.00111238	0.00281068			0.0757397	5.90014	0.0189218	0.0604086	0.059052	1.78231	0.0228699	0.312179	0.337221
LEM8I-4.d	Kaspakas	epithermal	sericitic	pyrite	euhedral, inclusions, dissolution	23.4906	369506	96.266	179.781	0.414763	1.63325	0.64274	1.01787	5.92934	31.4596	0.010428	0.0726476	0.00397143	0.0507133	0.0175309	0.34805	0.0121191	0.0093369	3.18326	2.35394	0.535463	9.88283	0.739476	16.2355	0.00293313	0.00550721	0.000108324	0.00327588	0.0244525	0.326799	9.69906e-05	0.000182109	0.000108324			0.109077	3.662	0.0220958	0.118795	0.0821464	1.63325	0.030327	0.304205	0.38165
LEM8I-5.d	Kaspakas	epithermal	sericitic	pyrite	anhedral, inclusions	119.578	381518	87.8832	253.551	1.51117	9.27616	1.09306	0.404048	9.93666	31.1478	0.018852	0.135957	0.00463385	0.100216	0.154007	1.77543	0.0230444	0.038702	11.3878	8.56879	0.346609	2.7352	0.752456	8.84434	0.00339856	0.0135239	0.000214512	0.00165546	0.0975021	0.354423	0.00044038	0.00175241	0.000214512			0.149471	2.96201	0.0185979	0.164914	0.143057	1.42286	0.0150834	0.313542	0.258122
LEM8I-6.d	Kaspakas	epithermal	sericitic	pyrite	anhedral, inclusions	51.1963	384312	149.512	122.828	1.00288	3.4242	3.01272	0.844136	4.75908	34.2539	0.0172315	0.0926335	0.00441278	0.105658	0.0510607	0.835949	0.0422727	0.0657222	5.97495	7.86318	1.21725	5.73291	1.31602	31.4161	0.0109996	0.0085458	0.000115252	0.00288396	0.0525923	0.229105	0.000439578	0.000341516	0.000115252			0.0486872	2.82531	0.0117511	0.211701	0.130349	2.02798	0.0400841	0.297542	0.185928
LEM8I-7.d	Kaspakas	epithermal	sericitic	pyrite	anhedral	27.8463	364371	106.075	97.4792	1.39353	1.6547	0.969024	0.652929	5.85816	17.7459	0.0134402	0.155236	0.00267634	0.204917	0.0315275	0.600412	0.0198908	0.0289796	5.72191	2.97011	1.08819	3.10139	0.519077	18.1073	0.00506468	0.00550995	0.000126704	0.00234891	0.028	0.167295	0.000273199	0.000297217	0.000126704			0.127037	3.05358	0.0130014	0.128505	0.106731	1.6547	0.0190204	0.347531	0.276171
LEM8I-9.d	Kaspakas	porphyry	potassic	pyrite	euhedral	48.1339	349270	28.4334	169.84	1.72498	6.20826	0.348217	0.617339	30.008	20.8914	0.0297953	0.352237	0.0114415	0.541611	0.164195	1.56238	0.0159541	0.0101977	8.09475	4.84912	0.167413	2.58086	0.599044	0.947526	0.0012598	0.0202841	0.0010479	0.00368082	0.170543	0.734751	0.000358654	0.00577473	0.0010479			0.375827	5.1596	0.0255061	0.362465	0.267963	1.98435	0.0406854	0.617339	0.402194
[truncated: 96 more columns]

## Sheet: Sardes
sample ID Sardes	loc Sardes	type Sardes	subtype Sardes	mineral Sardes	texture Sardes	Mn (ppm) Sardes	Fe (ppm) Sardes	Co (ppm) Sardes	Ni (ppm) Sardes	Cu (ppm) Sardes	Zn (ppm) Sardes	Ga (ppm) Sardes	Ge (ppm) Sardes	As (ppm) Sardes	Se (ppm) Sardes	Ag (ppm) Sardes	Cd (ppm) Sardes	In (ppm) Sardes	Sn (ppm) Sardes	Sb (ppm) Sardes	Te (ppm) Sardes	Au (ppm) Sardes	Tl (ppm) Sardes	Pb (ppm) Sardes	Bi (ppm) Sardes	Co/Ni (ppm) Sardes	Se/Pb (ppm) Sardes	Bi/Pb (ppm) Sardes	Co/As (ppm) Sardes	Tl/Pb (ppm) Sardes	Sb/Pb (ppm) Sardes	Ag/Co (ppm) Sardes	Ag/Pb (ppm) Sardes	Bi/Co (ppm) Sardes	Se/Co (ppm) Sardes	Tl/Co (ppm) Sardes	Sb/Co (ppm) Sardes	Ag/Co (ppm) Sardes			Mn L.O.D. Howell Sardes	Fe L.O.D. Howell Sardes	Co L.O.D. Howell Sardes	Ni L.O.D. Howell Sardes	Cu L.O.D. Howell Sardes	Zn L.O.D. Howell Sardes	Ga L.O.D. Howell Sardes	Ge L.O.D. Howell Sardes	As L.O.D. Howell Sardes
lem35-1.d	Sardes	porphyry	potassic	pyrite	anhedral	65.2826	355220	178.681	64.3265	0.267144	4.6327	0.0404411	0.568055	0.851233	29.6684	0.025122	0.234232	0.00815789	0.100761	0.0151559	0.406217	0.017689	0.00432516	1.48965	1.27884	2.77772	19.9164	0.858488	209.908	0.00290348	0.0101742	0.000140597	0.0168644	0.00715713	0.166041	2.42061e-05	8.4821e-05	0.000140597			0.13006	4.21396	0.024825	0.161076	0.151158	2.9029	0.0404411	0.223729	0.342439
LEM35-3.d	Sardes	porphyry	potassic	pyrite	anhedral, inclusions	20.0812	365670	80.2493	55.1799	1.40382	3.00121	0.412283	1.22863	9.14942	13.1366	0.0852299	0.183522	0.0043422	1.59131	0.21942	0.954803	0.0314831	0.00506024	3.86686	2.0402	1.45432	3.39722	0.527612	8.77098	0.00130862	0.0567437	0.00106206	0.0220411	0.0254233	0.163697	6.30565e-05	0.00273423	0.00106206			0.174134	3.94774	0.0236387	0.0983378	0.191116	3.00121	0.0167433	0.298089	0.277665
LEM35-4.d	Sardes	porphyry	potassic	pyrite	anhedral, inclusions	16.0411	357958	1264.82	4.19112	0.243861	4.01823	0.0508307	0.766093	18.199	12.1127	0.0203267	0.273524	0.00760983	0.137413	0.0490983	1.182	0.0145788	0.012457	0.54859	0.0124348	301.785	22.0796	0.0226668	69.4992	0.0227073	0.0894991	1.60709e-05	0.0370527	9.83128e-06	0.00957662	9.84887e-06	3.88186e-05	1.60709e-05			0.274118	9.88558	0.0309243	0.286172	0.243861	4.01823	0.0508307	0.766093	0.69087
LEM35-5.d	Sardes	porphyry	potassic	pyrite	anhedral, inclusions	16.5295	386282	107.199	85.9452	0.273511	4.43056	0.0317713	0.614614	19.3678	12.8884	0.0372969	0.436449	0.016408	0.103945	0.158384	1.01828	0.0189957	0.0794102	5.5882	3.68515	1.24729	2.30636	0.659452	5.5349	0.0142103	0.0283426	0.000347922	0.00667422	0.0343768	0.120229	0.000740775	0.00147748	0.000347922			0.33605	8.22718	0.0447987	0.181663	0.226551	4.43056	0.0317713	0.614614	0.841573
LEM35-6.d	Sardes	porphyry	potassic	pyrite	anhedral	15.7632	347854	304.813	23.4216	0.265101	1.69481	0.01677	0.7753	20.3523	10.6898	0.0142031	0.223657	0.00843761	0.0822628	0.0128675	0.088065	0.0148286	0.00433206	0.0173864	0.00478761	13.0142	614.836	0.275365	14.9769	0.249163	0.74009	4.65962e-05	0.816909	1.57067e-05	0.03507	1.42122e-05	4.22145e-05	4.65962e-05			0.100824	4.21798	0.0185399	0.188726	0.0854862	1.69481	0.01677	0.340168	0.180388
LEM35-7.d	Sardes	porphyry	potassic	pyrite	anhedral	16.9601	370856	338.235	19.0571	0.127132	1.55445	0.0323824	0.631156	11.4541	15.9333	0.00888387	0.209519	0.00571721	0.0614806	0.0217598	0.143458	0.013361	0.00768397	0.133332	0.000394319	17.7485	119.5	0.00295742	29.5295	0.0576302	0.1632	2.62654e-05	0.0666295	1.16581e-06	0.0471071	2.27178e-05	6.43334e-05	2.62654e-05			0.164713	5.13707	0.015929	0.240069	0.127132	1.55445	0.0323824	0.190704	0.243995
LEM35-8.d	Sardes	porphyry	potassic	pyrite	anhedral	15.9665	347473	1.7849	8.51437	0.110292	2.11901	0.0251373	0.708331	9.10182	14.7743	0.0174946	0.197004	0.00312594	0.124194	0.0147432	0.594837	0.0125138	0.00341813	0.088103	0.00535713	0.209633	167.693	0.0608053	0.196103	0.0387969	0.167341	0.00980145	0.19857	0.00300136	8.27738	0.00191503	0.00825999	0.00980145			0.0853744	2.10831	0.0132987	0.197482	0.0844378	2.11901	0.0251373	0.191115	0.241381
LEM35-9.d	Sardes	porphyry	potassic	pyrite	anhedral	15.6378	338838	0.16132	3.11035	0.105111	1.74782	0.0293793	0.698179	6.02946	14.8425	0.0063229	0.172931	0.0118454	0.0763015	0.0154903	0.417308	0.0127348	0.00818659	0.0252912	0.00366318	0.0518657	586.864	0.14484	0.0267553	0.323694	0.612478	0.0391947	0.250004	0.0227075	92.0062	0.0507475	0.0960219	0.0391947			0.130795	4.26193	0.0138567	0.125373	0.0776285	1.74782	0.0293793	0.149579	0.207209
LEM35-10.d	Sardes	porphyry	potassic	pyrite	anhedral	16.1817	345588	0.674766	1.63847	0.11257	1.84209	0.0256763	0.756343	5.84884	17.3356	0.0101136	0.129562	0.00444427	0.0803775	0.00784528	0.200721	0.0116202	0.00567664	0.178679	0.00272567	0.411826	97.021	0.0152546	0.115367	0.03177	0.043907	0.0149884	0.0566022	0.00403944	25.6914	0.00841275	0.0116267	0.0149884			0.119691	2.62236	0.0224403	0.18878	0.11257	1.84209	0.0256763	0.250948	0.293372
LEM35-11.d	Sardes	porphyry	potassic	pyrite	anhedral	17.7519	358660	993.648	2.19951	0.413002	1.79982	0.0570212	0.660753	22.1573	14.0163	0.0447085	0.222528	0.00527358	0.0846267	0.0171434	2.07219	0.0220061	0.0126684	3.76841	0.582428	451.758	3.71941	0.154555	44.8451	0.00336174	0.00454924	4.49943e-05	0.011864	0.000586151	0.0141059	1.27494e-05	1.7253e-05	4.49943e-05			0.152656	4.94843	0.0203008	0.133604	0.124116	1.79982	0.0570212	0.288412	0.351578
lem65-1.d	Sardes	porphyry	potassic	pyrite	anhedral, inclusions	36.5597	374370	50.7817	16.1158	0.344492	2.91418	0.065867	0.590601	14.0313	15.2243	0.0280941	0.162404	0.00352022	0.104006	0.0227386	1.36269	0.021484	0.00561468	3.20966	0.375476	3.15106	4.74328	0.116983	3.61918	0.00174931	0.00708445	0.000553232	0.00875299	0.00739392	0.299798	0.000110565	0.000447772	0.000553232			0.0892834	4.80805	0.0189834	0.145856	0.136244	2.91418	0.0237769	0.519599	0.319051
LEM65-2.d	Sardes	porphyry	potassic	pyrite	anhedral, inclusions	233.845	518474	32.9245	98.7738	7.11775	9.15233	0.298462	0.991375	5.09729	39.4893	2.44735	0.599278	0.599278	700.663	83.4033	0.656584	0.0265272	0.27024	11168.2	2.98603	0.333333	0.00353587	0.000267369	6.45922	2.41972e-05	0.00746792	0.074332	0.000219135	0.0906933	1.19939	0.00820785	2.53317	0.074332			0.41044	13.2106	0.045717	0.279965	0.407058	3.81871	0.0601227	0.827621	0.783209
LEM65-3.d	Sardes	porphyry	potassic	pyrite	anhedral, inclusions	23.4235	410730	880.001	35.5507	0.135441	1.72475	0.0330534	1.22184	15.2062	38.468	0.0106124	0.127837	1.17748e-05	0.0954992	0.0676286	2.72351	0.0164538	0.00589168	0.200974	0.0327956	24.7534	191.408	0.163184	57.8713	0.0293157	0.336505	1.20595e-05	0.052805	3.72677e-05	0.0437136	6.69508e-06	7.68506e-05	1.20595e-05			0.20144	4.78848	0.0228441	0.245346	0.127953	1.72475	0.0330534	0.216529	0.197006
LEM65-5.d	Sardes	porphyry	potassic	pyrite	anhedral, inclusions	70.072	446520	63.7733	24.7184	94.8961	6.79873	0.173573	0.719323	0.875155	29.4625	0.150714	0.0914128	0.000717255	1.2712	0.0983417	0.17325	0.0364575	0.010802	8.89536	1.94764	2.57999	3.31212	0.21895	72.8709	0.00121434	0.0110554	0.00236328	0.016943	0.03054	0.461987	0.000169381	0.00154205	0.00236328			0.2058	5.08222	0.0230525	0.158455	0.163143	2.83207	0.0354441	0.288831	0.419534
LEM65-6.d	Sardes	porphyry	potassic	pyrite	anhedral, inclusions	31.3353	410606	88.3364	54.8902	0.537365	4.46249	3.86684	29.1821	15.0066	51.2916	0.0334714	0.247373	0.0154302	0.162665	0.337916	0.220783	0.0256107	0.0123589	8.24725	1.10448	1.60933	6.21925	0.133921	5.88651	0.00149855	0.0409732	0.000378909	0.0040585	0.0125031	0.58064	0.000139907	0.00382533	0.000378909			0.316274	10.4297	0.0295518	0.283472	0.206437	4.46249	0.0442223	0.507369	0.683039
LEM65-8.d	Sardes	porphyry	potassic	pyrite	anhedral, inclusions	53.3359	378491	1071.46	20.2104	70.3825	2714.41	0.0578901	0.437934	67.7026	72.5433	0.586653	36.2408	1.01312	0.138208	0.244392	4.81784	0.30974	0.00880243	27.132	3.16851	53.0153	2.67372	0.116781	15.826	0.00032443	0.00900751	0.000547526	0.0216222	0.00295718	0.067705	8.21536e-06	0.000228092	0.000547526			0.218631	7.3416	0.0391647	0.158749	0.206124	3.82081	0.036474	0.36634	0.490528
LEM65-9.d	Sardes	porphyry	potassic	pyrite	anhedral	23.5834	404739	308.478	38.6524	2.4394	2.61529	0.513942	0.974934	7.98477	63.8556	0.783358	0.165082	0.00817493	0.150821	0.0725369	0.49778	0.0164123	0.0728146	4.21839	0.909318	7.98082	15.1374	0.21556	38.6333	0.0172612	0.0171954	0.00253943	0.1857	0.00294776	0.207002	0.000236045	0.000235145	0.00253943			0.177419	3.16055	0.0221298	0.174133	0.0782558	2.61529	0.0329008	0.402708	0.417409
LEM65-10.d	Sardes	porphyry	potassic	pyrite	anhedral	21.4748	417915	625.474	2.95816	0.119267	1.48452	0.0302714	0.644771	17.588	122.886	0.021051	0.0879502	0.00414687	0.0862073	0.0192053	0.879146	1.98519e-05	0.00593168	0.0188087	0.00190869	211.44	6533.48	0.101479	35.5625	0.315369	1.02109	3.36561e-05	1.11922	3.0516e-06	0.196469	9.4835e-06	3.07052e-05	3.36561e-05			0.0945059	4.96479	0.0242359	0.147866	0.119267	1.48452	0.0302714	0.427363	0.306753
LEM40A2-2.d	Sardes	porphyry	potassic	pyrite	anhedral	149.49	439014	2.49112	454.838	15.7731	29.6916	0.373882	0.819656	1.25412	11.9811	0.511515	0.124644	0.00538438	0.105903	0.168542	1.33243	0.90143	0.012055	79.4707	5.60713	0.00547694	0.150761	0.0705559	1.98634	0.000151691	0.00212081	0.205336	0.00643653	2.25085	4.80951	0.00483918	0.0676572	0.205336			0.0758911	4.53977	0.0200458	0.162155	0.107809	2.35959	0.0232921	0.22671	0.39389
LEM40A2-10.d	Sardes	porphyry	potassic	pyrite	subhedral	74.0988	389109	11.1088	18.2584	19.1726	9.15686	0.648649	0.883574	47.6796	1.43047	2.71952	0.304097	0.0221519	0.125882	0.388492	0.191136	0.12157	0.00651783	100.339	1.62273	0.608425	0.0142565	0.0161725	0.23299	6.49584e-05	0.00387182	0.244806	0.0271034	0.146075	0.128769	0.000586725	0.0349714	0.244806			0.322206	10.8803	0.0288194	0.237926	0.434577	4.28752	0.0642195	0.883574	0.449968
LEM40A2-3.d	Sardes	porphyry	potassic	chalcopyrite	anhedral	21.8129	418414	1.06138	1.33542	454930	336.866	0.741409	1.98192	6.0052	123.365	3.00925	4.21633	9.30764	0.812435	0.290454	0.000540641	0.126752	0.0594976	16.8323	0.45616	0.794787	7.32907	0.0271003	0.176743	0.00353473	0.0172558	2.83524	0.178778	0.429782	116.231	0.0560571	0.273658	2.83524			0.873058	32.6208	0.237249	1.33542	0.832997	19.5637	0.45262	1.98192	6.0052
LEM40A2-9.d	Sardes	porphyry	potassic	chalcopyrite	anhedral	21.6906	387031	0.477436	1.54636	502068	163.005	0.617376	3.06306	2.53624	81.934	4.13932	12.4893	10.8958	0.822987	0.141994	4.12893	0.0816741	0.0513988	24.4955	0.131215	0.308749	3.34485	0.0053567	0.188246	0.00209829	0.00579673	8.6699	0.168983	0.274833	171.612	0.107656	0.29741	8.6699			1.294	45.1276	0.154701	1.54636	1.64801	19.4033	0.220196	3.06306	2.53624
lem51-1.d	Sardes	porphyry	potassic	pyrite	anhedral, inclusions	110.172	410940	22.1455	752.828	441.144	34.8439	0.810012	0.847228	133.002	73.8559	0.544162	0.264986	0.228823	1.22593	0.282711	2.84041	0.263202	0.0159556	31.2586	13.7807	0.0294164	2.36274	0.44086	0.166505	0.000510437	0.00904427	0.0245722	0.0174084	0.622279	3.33504	0.000720489	0.0127661	0.0245722			0.184731	4.69485	0.0541597	0.168909	0.122215	2.97822	0.0401411	0.317942	0.349015
LEM51-2.d	Sardes	porphyry	potassic	pyrite	anhedral	24.4358	370381	103.047	5.92617	61.7742	6.3997	0.199792	0.5478	238.171	58.0656	0.591991	1.09716	0.163732	0.305302	0.314701	3.92315	0.567943	0.113907	574.082	6.15933	17.3885	0.101145	0.010729	0.432661	0.000198416	0.000548181	0.00574485	0.0010312	0.0597719	0.563486	0.00110539	0.00305395	0.00574485			0.153163	5.82648	0.0297218	0.245771	0.186289	2.18792	0.0424829	0.5478	0.331554
LEM51-3.d	Sardes	porphyry	potassic	pyrite	anhedral	20.5282	340135	21.1936	2.12538	0.326564	2.13632	0.032712	0.629972	18.207	69.9315	0.031359	0.233922	0.00509664	0.861205	0.0172348	2.12495	0.0119284	0.014458	2.37135	0.433086	9.97164	29.4902	0.182633	1.16403	0.00609696	0.00726792	0.00147965	0.0132241	0.0204348	3.29966	0.000682189	0.000813207	0.00147965			0.165067	4.62772	0.0257521	0.203645	0.106076	2.13632	0.032712	0.283844	0.451444
LEM51-5.d	Sardes	porphyry	potassic	pyrite	anhedral	61.496	343570	106.738	0.851254	0.404631	1.59034	0.043546	0.968616	49.5413	99.5902	0.0198403	0.0888677	0.00616856	0.172329	0.0248092	1.61306	0.0291252	0.00976808	0.784769	0.194382	125.389	126.904	0.247693	2.15451	0.0124471	0.0316134	0.000185879	0.0252816	0.00182112	0.933038	9.15149e-05	0.000232432	0.000185879			0.15859	4.70962	0.0182953	0.198048	0.126336	1.59034	0.0368454	0.402084	0.286493
LEM51-6.d	Sardes	porphyry	potassic	pyrite	anhedral	15.023	336737	21.2421	11.9568	0.128621	1.96393	0.0333685	0.628409	4.88314	26.5215	1.98803e-06	0.0790298	0.0059912	0.0850207	0.0136691	0.190338	0.0180951	0.00514303	0.0262704	0.00341072	1.77658	1009.56	0.129831	4.35009	0.195773	0.520324	9.35893e-08	7.56759e-05	0.000160564	1.24853	0.000242115	0.000643492	9.35893e-08			0.133146	5.53482	0.00826574	0.218557	0.128621	1.96393	0.0333685	0.30151	0.300963
LEM51-8.d	Sardes	porphyry	potassic	pyrite	subhedral	15.2138	327494	11.5892	9.12839	0.234576	1.8706	0.0317891	0.714644	2.59573	19.6853	0.00333871	0.115576	0.00570593	0.0809845	0.0130213	0.181303	0.0172332	0.00489827	0.0376501	0.00324859	1.26957	522.848	0.0862838	4.4647	0.1301	0.345851	0.000288088	0.0886773	0.000280312	1.69859	0.000422659	0.00112357	0.000288088			0.126812	5.27252	0.00787304	0.208172	0.122528	1.8706	0.0317891	0.287284	0.286738
LEM51-9.d	Sardes	porphyry	potassic	pyrite	subhedral	40.4534	363310	149.143	99.4358	24.043	5.43807	0.0884055	0.326322	18.5336	130.327	0.0303192	0.114831	0.0245558	0.0911165	0.0185115	2.13753	0.00926772	0.00737287	3.98965	0.405894	1.49989	32.6663	0.101737	8.04719	0.001848	0.00463989	0.000203289	0.00759946	0.00272151	0.873839	4.94349e-05	0.000124119	0.000203289			0.175382	5.15301	0.0168352	0.192921	0.100186	1.23043	0.0140644	0.307373	0.218
33I-1.d	Sardes	epithermal	epithermal IS	pyrite	anhedral, inclusions	17.65	390673	53.3736	901.353	0.169834	1.17728	0.0224502	0.620718	261.94	11.4826	0.00797746	0.191149	0.00329302	0.0905022	0.0239204	0.192317	0.0105052	0.0104228	0.132584	0.00557277	0.0592149	86.6064	0.0420321	0.203763	0.0786128	0.180417	0.000149465	0.0601692	0.000104411	0.215136	0.00019528	0.000448169	0.000149465			0.16544	4.96721	0.026728	0.127144	0.131491	1.17728	0.0224502	0.355281	0.34144
33I-2.d	Sardes	epithermal	epithermal IS	pyrite	anhedral, inclusions	18.5333	376741	148.327	892.786	0.27896	3.87004	0.0624128	0.856838	68.9337	23.6843	0.0144587	0.203669	0.0081164	0.301385	0.0605804	0.379238	0.0303621	0.0171426	0.322031	0.101298	0.166139	73.5465	0.314561	2.15173	0.0532327	0.18812	9.74789e-05	0.0448986	0.00068294	0.159676	0.000115573	0.000408425	9.74789e-05			0.16155	9.96124	0.0371708	0.253945	0.27896	3.87004	0.0624128	0.782696	0.543549
33I-12.d	Sardes	epithermal	epithermal IS	pyrite	anhedral, cracked	17.5198	378410	74.0583	1694.73	3.10876	4.41685	0.063408	0.879819	119.647	27.278	0.526455	0.171364	0.012195	0.174044	4.86382	1.70221	0.0473368	0.0460438	8.74079	0.543916	0.0436993	3.12077	0.0622273	0.618974	0.0052677	0.55645	0.00710866	0.0602297	0.00734443	0.368332	0.000621724	0.0656755	0.00710866			0.389026	10.8292	0.029785	0.338623	0.229457	4.41685	0.063408	0.879819	1.61388
33I-13.d	Sardes	epithermal	epithermal IS	pyrite	anhedral, inclusions	22.0328	416121	1.05475	25.6124	127.778	3.75475	0.100561	0.959053	4376.64	6.76328	15.8032	0.173482	0.0121108	0.154166	227.212	4.35011	9.77298	7.15314	102.783	1.3123	0.0411812	0.0658018	0.0127678	0.000240995	0.0695949	2.21061	14.9829	0.153754	1.24419	6.41222	6.78184	215.418	14.9829			0.318818	10.0441	0.0526442	0.434248	0.351621	3.75475	0.100561	0.727934	2.23129
33I-15.d	Sardes	epithermal	epithermal IS	pyrite	anhedral, inclusions	24.0768	423914	344.761	1519.56	5.68127	3.00411	0.12503	0.82973	939.732	14.2195	0.0574795	0.198528	0.0102713	0.208138	17.6023	4.89108	0.269826	0.0452597	21.206	1.33977	0.226883	0.670539	0.063179	0.366872	0.00213429	0.830062	0.000166723	0.00271053	0.00388609	0.0412444	0.000131279	0.0510565	0.000166723			0.539533	11.7315	0.0626952	0.241626	0.326381	3.00411	0.0373046	0.82973	2.22981
33I-17.d	Sardes	epithermal	epithermal IS	pyrite	anhedral	18.1429	381976	92.111	3983.33	6.58011	4.40409	0.0522706	0.872246	305.981	109.284	0.0225769	0.124091	0.016717	0.183917	0.0346885	1.21539	0.0446231	0.010582	2.51479	0.159754	0.0231241	43.4564	0.0635256	0.301035	0.00420792	0.0137938	0.000245105	0.00897764	0.00173436	1.18643	0.000114884	0.000376594	0.000245105			0.286853	9.57087	0.0654593	0.343252	0.203361	4.40409	0.0522706	0.872246	1.61791
33I-3.d	Sardes	epithermal	epithermal IS	marcasite	aggregate of euhedral grains	17.9775	392757	10.3536	106.083	133.894	4.2759	0.0443651	1.06182	42234.1	11.6717	20.3439	0.343833	0.0151761	0.811967	657.952	7.61601	9.97517	8.80945	178.084	0.598511	0.0975989	0.0655404	0.00336084	0.000245148	0.0494681	3.69463	1.96491	0.114238	0.0578069	1.1273	0.850857	63.548	1.96491			0.285948	17.4416	0.0644661	0.259038	0.392762	4.2759	0.0286233	0.802348	0.799872
33I-4.d	Sardes	epithermal	epithermal IS	marcasite	aggregate of euhedral grains	19.4651	404329	13.7397	54.4442	202.914	6.38438	0.0654918	1.09815	48806.9	10.2752	27.7213	0.149046	0.016536	0.440314	1228.98	7.63872	4.5932	10.9734	142.331	0.405934	0.252363	0.0721923	0.00285204	0.000281512	0.077098	8.63463	2.01761	0.194766	0.0295446	0.747849	0.798667	89.4471	2.01761			0.453297	10.1301	0.0742056	0.34105	0.321984	6.38438	0.0654918	0.566345	0.563105
33I-5.d	Sardes	epithermal	epithermal IS	marcasite	aggregate of euhedral grains	22.0613	451057	16.6171	121.173	254.13	7.05039	0.744273	1.02377	60400.8	20.0341	50.0308	0.319398	0.0199585	0.344963	1263.49	26.6651	13.5198	7.05368	247.775	1.22354	0.137135	0.0808558	0.00493809	0.000275114	0.0284681	5.09932	3.0108	0.20192	0.0736312	1.20563	0.424484	76.0353	3.0108			0.53825	10.2863	0.0632052	0.362136	0.298462	7.05039	0.0677822	0.874883	1.26664
33I-6.d	Sardes	epithermal	epithermal IS	marcasite	aggregate of euhedral grains	34.2231	518330	11.4415	141.993	420.451	10.686	1.3382	0.976115	329306	58.902	68.6227	0.476037	0.110269	1.23933	5233.48	81.8801	32.3799	8.51592	575.066	1.93521	0.0805779	0.102427	0.0033652	3.47442e-05	0.0148086	9.10067	5.99773	0.11933	0.16914	5.14812	0.744304	457.414	5.99773			0.416716	16.76	0.0975858	0.364749	0.424161	4.74781	0.0747642	0.976115	1.49641
33I-7.d	Sardes	epithermal	epithermal IS	marcasite	aggregate of euhedral grains	17.4652	300928	9.56974	76.9977	173.43	4.35672	0.428667	0.613647	98252.8	28.6289	40.4775	0.269818	0.10388	0.282611	1250.37	27.8923	14.3164	4.64179	197.04	1.3381	0.124286	0.145295	0.00679101	9.73992e-05	0.0235576	6.34575	4.22974	0.205428	0.139826	2.99161	0.485049	130.658	4.22974			0.366765	10.9765	0.0462692	0.280932	0.19538	3.41749	0.046016	0.586561	1.94012
33I-8.d	Sardes	epithermal	epithermal IS	marcasite	aggregate of euhedral grains	22.1302	416473	8.67279	97.1858	293.675	3.81551	0.573266	0.666369	66951.1	26.2266	51.5165	0.344285	0.0531537	0.191109	1301.6	30.0952	25.0929	8.17138	200.731	1.12105	0.0892393	0.130656	0.00558483	0.000129539	0.0407081	6.48429	5.94002	0.256645	0.12926	3.02401	0.942186	150.078	5.94002			0.357541	9.65643	0.0433167	0.310884	0.278166	3.81551	0.0695944	0.666369	1.37147
33I-10.d	Sardes	epithermal	epithermal IS	marcasite	aggregate of euhedral grains	21.1244	312807	8.5659	76.9664	327.569	6.56282	0.985022	0.544157	229644	47.5968	45.4068	0.3281	0.173003	0.476125	2973.94	94.3042	14.6106	6.12208	337.95	1.23053	0.111294	0.14084	0.00364115	3.73007e-05	0.0181154	8.79995	5.30088	0.13436	0.143654	5.55654	0.714704	347.184	5.30088			0.426725	12.34	0.0310487	0.491763	0.167784	3.76548	0.0590613	0.501088	3.02834
33I-14.d	Sardes	epithermal	epithermal IS	marcasite	aggregate of euhedral grains	22.7017	440141	10.709	173.349	99.3974	3.86842	0.0448908	0.746418	30806.8	7.86503	54.5068	0.24203	0.0289269	5.74448	747.131	14.1245	5.82737	10.6411	458.931	2.09732	0.0617772	0.0171377	0.00457001	0.000347618	0.0231868	1.62798	5.08981	0.118769	0.195846	0.734432	0.993662	69.7666	5.08981			0.237986	11.2411	0.0369053	0.340244	0.391742	2.95192	0.0448908	0.746418	2.09916
33I-16.d	Sardes	epithermal	epithermal IS	marcasite	aggregate of euhedral grains	21.1754	442093	5.85435	155.187	169.886	4.98805	0.0820312	0.987678	29997.1	9.70654	69.6033	0.274592	0.0135018	2.5204	920.194	7.23248	3.33468	21.875	1377.22	1.91185	0.0377244	0.0070479	0.00138819	0.000195164	0.0158834	0.668151	11.8892	0.0505388	0.326569	1.658	3.73654	157.181	11.8892			0.324843	10.8383	0.0741262	0.388693	0.230449	4.98805	0.0591931	0.987678	1.83228
33I-9.d	Sardes	epithermal	epithermal IS	sulfosalt/mix?	0	1232.21	2.70956e+06	11.1155	80.2406	8030.71	1761.12	74.7421	10.1708	4.89914e+06	92.3721	33.0439	12.5477	20.6272	45.8966	80373.6	4588.8	32.2578	51.5649	13926.3	6.0712	0.138528	0.00663291	0.000435951	2.26888e-06	0.00370269	5.77134	2.97277	0.00237277	0.54619	8.31018	4.63899	7230.74	2.97277			6.5336	151.768	0.486166	6.82897	3.75618	77.2943	0.694204	8.54102	27.9235
[truncated: 96 more columns]

## Sheet: depth_profiles_05_08_21
sample IDdepth_profile	locdepth_profile	typedepth_profile	mineraldepth_profile	texturedepth_profile	Mn (ppm)depth_profile	Fe (ppm)depth_profile	Co (ppm)depth_profile	Ni (ppm)depth_profile	Cu (ppm)depth_profile	Zn (ppm)depth_profile	Ga (ppm)depth_profile	Ge (ppm)depth_profile	As (ppm)depth_profile	Se (ppm)depth_profile	Ag (ppm)depth_profile	Cd (ppm)depth_profile	In (ppm)depth_profile	Sn (ppm)depth_profile	Sb (ppm)depth_profile	Te (ppm)depth_profile	Au (ppm)depth_profile	Tl (ppm)depth_profile	Pb (ppm)depth_profile	Bi (ppm)depth_profile	Co/Ni (ppm)depth_profile	Se/Pb (ppm)depth_profile	Bi/Pb (ppm)depth_profile	Co/As (ppm)depth_profile	Tl/Pb (ppm)depth_profile	Sb/Pb (ppm)depth_profile	Ag/Co (ppm)depth_profile	Ag/Pb (ppm)depth_profile	Bi/Co (ppm)depth_profile	Se/Co (ppm)depth_profile	Tl/Co (ppm)depth_profile	Sb/Co (ppm)depth_profile	Ag/Co (ppm)depth_profile			Mn L.O.D. Howelldepth_profile	Fe L.O.D. Howelldepth_profile	Co L.O.D. Howelldepth_profile	Ni L.O.D. Howelldepth_profile	Cu L.O.D. Howelldepth_profile	Zn L.O.D. Howelldepth_profile	Ga L.O.D. Howelldepth_profile	Ge L.O.D. Howelldepth_profile	As L.O.D. Howelldepth_profile	Se L.O.D. Howelldepth_profile
LM-JB-7A-07	Fakos	epithermal	pyrite	subhedral	112.629	464496	69.1906	245.043	20.8419	2.11453	0.175021	0.804715	540.289	4.61163	9.05188	0.231671	0.0123832	0.147167	6.98846	21.9698	2.60082	0.418578	97.4232	0.0533635	0.282361	0.047336	0.000547749	0.128062	0.00429649	0.071733	0.130825	0.0929129	0.000771253	0.066651	0.00604964	0.101003	0.130825			0.233161	8.43603	0.0495433	0.509548	0.267043	1.09773	0.0382903	0.804715	0.314773	2.70016
18A-8.d	Kaspakas		pyrite	subhedral	17.6541	422950	13.4639	63.7037	0.545205	2.23724	0.0283142	0.711159	213.422	2.56633	0.0164692	0.0808933	0.00672451	0.0867483	0.171249	2.9653	0.00204899	0.00692729	3.50666	0.0519671	0.211352	0.731845	0.0148195	0.063086	0.00197547	0.0488355	0.00122321	0.00469655	0.00385972	0.190608	0.000514507	0.0127191	0.00122321			0.146643	4.07326	0.0142211	0.0467236	0.0841712	2.23724	0.0184291	0.342034	0.241208	0.904936
68BIII6.d	Sardes		pyrite	euhedral	22.4652	467452	142.868	101.688	3.00304	3.09826	0.391701	0.95832	111.554	26.9799	2.85058	0.0581091	0.0034003	0.130754	0.786295	2.5215	0.32476	0.00841323	5.37152	0.915835	1.40497	5.02276	0.170498	1.28072	0.00156627	0.146382	0.0199525	0.530683	0.00641034	0.188844	5.8888e-05	0.00550364	0.0199525			0.15318	9.16634	0.0296651	0.203455	0.177566	3.09826	0.0260341	0.158766	0.268407	0.743331
LM33b_III_py9 (170)	Fakos	epithermal	pyrite		n.a.	422534	43.0964	415.523	619.324	912.406	n.a.	n.a.	20.6934	6.03453	1236.05	11.1015	n.a.	n.a.	11.4961	1630.26	219.135	0.0284052	182.719	0.0443988	0.103716	0.0330263	0.00024299	2.08261	0.000155458	0.0629169	28.6811	6.76477	0.00103022	0.140024	0.000659108	0.266753	28.6811				13.5189	0.0288933	0.415593	0.581365	4.06986			0.301699	1.33703
[truncated: 93 more columns]

## Sheet: Fakos sericitic
sample ID Fakos I prop	loc Fakos I prop	type Fakos I prop	subtype Fakos I prop	mineral Fakos I prop	texture Fakos I prop	Mn (ppm) Fakos I prop	Fe (ppm) Fakos I prop	Co (ppm) Fakos I prop	Ni (ppm) Fakos I prop	Cu (ppm) Fakos I prop	Zn (ppm) Fakos I prop	Ga (ppm) Fakos I prop	Ge (ppm) Fakos I prop	As (ppm) Fakos I prop	Se (ppm) Fakos I prop	Ag (ppm) Fakos I prop	Cd (ppm) Fakos I prop	In (ppm) Fakos I prop	Sn (ppm) Fakos I prop	Sb (ppm) Fakos I prop	Te (ppm) Fakos I prop	Au (ppm) Fakos I prop	Tl (ppm) Fakos I prop	Pb (ppm) Fakos I prop	Bi (ppm) Fakos I prop	Co/Ni (ppm) Fakos I prop	Se/Pb (ppm) Fakos I prop	Bi/Pb (ppm) Fakos I prop	Co/As (ppm) Fakos I prop	Tl/Pb (ppm) Fakos I prop	Sb/Pb (ppm) Fakos I prop	Ag/Co (ppm) Fakos I prop	Ag/Pb (ppm) Fakos I prop	Bi/Co (ppm) Fakos I prop	Se/Co (ppm) Fakos I prop	Tl/Co (ppm) Fakos I prop	Sb/Co (ppm) Fakos I prop	Ag/Co (ppm) Fakos I prop			Mn L.O.D. Howell Fakos I prop	Fe L.O.D. Howell Fakos I prop	Co L.O.D. Howell Fakos I prop	Ni L.O.D. Howell Fakos I prop	Cu L.O.D. Howell Fakos I prop	Zn L.O.D. Howell Fakos I prop	Ga L.O.D. Howell Fakos I prop	Ge L.O.D. Howell Fakos I prop	As L.O.D. Howell Fakos I prop
LM64_I_py7	Fakos	porphyry	sercicitic	pyrite	0	n.a.	464335	9.89023	168.237	26.6747	6.2637	n.a.	n.a.	1.57531	134.602	10.072	0.411169	n.a.	n.a.	0.857881	11.8656	1.63171	0.0419805	44.2881	2.70419	0.0587876	3.03925	0.0610592	6.27826	0.000947897	0.0193705	1.01838	0.22742	0.273421	13.6096	0.00424464	0.0867402	1.01838			n.a.	40.056	0.0586233	0.541892	0.785922	6.2637	n.a.	n.a.	0.457151
LM64_I_py8	Fakos	porphyry	sercicitic	pyrite	0	n.a.	454129	21.7447	122.124	5.85716	3.58619	n.a.	n.a.	2.63816	94.3649	3.59956	0.186186	n.a.	n.a.	0.751872	2.90849	0.361917	0.0161309	3.01826	0.212062	0.178054	31.2647	0.0702596	8.24238	0.00534443	0.249108	0.165537	1.19259	0.00975233	4.33967	0.000741829	0.0345772	0.165537			n.a.	40.2394	0.0668619	0.474939	0.527356	3.58619	n.a.	n.a.	0.355345
LM64_II_py7	Fakos	porphyry	sercicitic	pyrite	0	n.a.	469155	60.8115	442.468	2.90157	4.44752	n.a.	n.a.	5.09	66.6489	0.057785	0.168647	n.a.	n.a.	0.330723	6.25926	0.0223796	0.0116104	0.669133	0.491774	0.137437	99.6048	0.734942	11.9473	0.0173515	0.494256	0.000950232	0.086358	0.00808687	1.09599	0.000190925	0.0054385	0.000950232			n.a.	21.632	0.0525071	0.326894	0.575626	4.44752	n.a.	n.a.	0.278344
LM64_II_py6	Fakos	porphyry	sercicitic	pyrite	0	n.a.	495110	47.4193	201.726	1909.21	3.9816	n.a.	n.a.	2663.88	38.796	0.8779	0.229217	n.a.	n.a.	15.8526	43.8247	0.534965	0.0894072	68.0857	19.5819	0.235067	0.569811	0.287606	0.0178008	0.00131316	0.232833	0.0185136	0.012894	0.412952	0.818149	0.00188546	0.334307	0.0185136			n.a.	19.8953	0.0324672	0.288155	0.672952	3.9816	n.a.	n.a.	0.289646
LM64_II_py2.3	Fakos	porphyry	sercicitic	pyrite	0	n.a.	462390	16.3317	111.523	4.14906	5.08123	n.a.	n.a.	0.676478	48.0654	2.00322	0.2662	n.a.	n.a.	0.177743	25.3735	1.13208	0.0346736	4.30628	4.94959	0.146443	11.1617	1.14939	24.1423	0.00805186	0.0412753	0.122658	0.465186	0.303065	2.94307	0.00212308	0.0108833	0.122658			n.a.	28.3514	0.0439042	0.445473	0.682152	5.08123	n.a.	n.a.	0.345664
LM64_II_py2.2	Fakos	porphyry	sercicitic	pyrite	0	n.a.	474418	188.7	555.19	15.0295	3.88573	n.a.	n.a.	10.0968	50.1984	0.465761	0.239047	n.a.	n.a.	1.35932	55.5887	0.70267	0.126879	62.8799	6.06098	0.339883	0.798322	0.0963897	18.689	0.00201779	0.0216177	0.00246827	0.00740715	0.0321197	0.266023	0.000672384	0.00720362	0.00246827			n.a.	21.7297	0.0735296	0.336724	0.75168	3.88573	n.a.	n.a.	0.288666
LM64_II_py2.1	Fakos	porphyry	sercicitic	pyrite	0	n.a.	506618	192.586	713.469	15.5645	3.08022	n.a.	n.a.	13.9671	82.8357	0.898808	0.336795	n.a.	n.a.	1.26808	29.5994	0.212964	0.0258809	29.1079	0.398206	0.26993	2.84581	0.0136803	13.7885	0.000889137	0.0435647	0.00466704	0.0308784	0.00206768	0.430122	0.000134386	0.00658446	0.00466704			n.a.	26.839	0.0359838	0.265161	0.743391	3.08022	n.a.	n.a.	0.180838
LM64_III_py4	Fakos	porphyry	sercicitic	pyrite	0	n.a.	413648	157.547	412.46	8.65714	5.18288	n.a.	n.a.	9.09159	103.72	0.42646	0.217569	n.a.	n.a.	2.9188	47.5918	0.285852	0.0262218	9.39655	7.22312	0.381968	11.0381	0.768699	17.3288	0.00279058	0.310625	0.00270688	0.0453847	0.0458475	0.658342	0.000166439	0.0185266	0.00270688			n.a.	17.4905	0.0565795	0.283668	0.601053	5.18288	n.a.	n.a.	0.36728
LM64_III_py5	Fakos	porphyry	sercicitic	pyrite	0	n.a.	547134	238.733	603.413	6.00551	4.56089	n.a.	n.a.	7.22985	88.956	10.5622	0.294227	n.a.	n.a.	0.28049	12.8029	0.397931	0.0219933	5.23636	0.241681	0.395638	16.9881	0.0461544	33.0205	0.00420012	0.0535658	0.0442427	2.01709	0.00101235	0.372617	9.21252e-05	0.00117491	0.0442427			n.a.	39.6184	0.0795382	0.497813	1.02449	4.56089	n.a.	n.a.	0.601082
LM64_V_py_2	Fakos	porphyry	sercicitic	pyrite	0	n.a.	504860	1.59344	31.4637	2.76671	3.184	n.a.	n.a.	1.95186	156.412	0.0322234	0.145474	n.a.	n.a.	0.0920832	4.33358	0.0220984	0.0167324	0.691363	0.466961	0.0506437	226.237	0.675421	0.81637	0.024202	0.133191	0.0202226	0.0466085	0.293053	98.1602	0.0105008	0.057789	0.0202226			n.a.	19.4891	0.0274566	0.55602	0.705629	3.184	n.a.	n.a.	0.251652
LM64_V_py_9	Fakos	porphyry	sercicitic	pyrite	0	n.a.	447101	53.7158	518.766	5.05417	4.43057	n.a.	n.a.	1.58429	103.95	0.0362608	0.285718	n.a.	n.a.	0.0787278	2.72526	0.0328598	0.0131096	1.74672	0.226473	0.103545	59.5115	0.129656	33.9052	0.00750526	0.0450718	0.00067505	0.0207594	0.00421614	1.93518	0.000244054	0.00146564	0.00067505			n.a.	25.8271	0.0458048	0.269845	0.853309	4.43057	n.a.	n.a.	0.275213
LM64_V_py_6	Fakos	porphyry	sercicitic	pyrite	0	n.a.	462961	94.8712	721.481	1.60948	2.78946	n.a.	n.a.	2.93288	186.558	0.150701	0.108041	n.a.	n.a.	0.511674	3.91659	0.0285826	0.0164398	0.714037	0.272306	0.131495	261.272	0.381361	32.3475	0.0230237	0.716593	0.00158848	0.211054	0.00287027	1.96644	0.000173285	0.00539336	0.00158848			n.a.	23.5607	0.0424915	0.381641	0.646358	2.78946	n.a.	n.a.	0.258208
LM64_V_py_3	Fakos	porphyry	sercicitic	pyrite	0	n.a.	564193	6.60105	169.561	3.23433	5.50263	n.a.	n.a.	3.14359	250.434	1.02982	0.149394	n.a.	n.a.	0.640084	9.85976	0.0999766	0.0230276	475.193	2.50178	0.0389302	0.527016	0.00526477	2.09984	4.84594e-05	0.001347	0.156008	0.00216716	0.378998	37.9385	0.00348847	0.096967	0.156008			n.a.	37.1203	0.0625632	0.441092	1.05881	5.44413	n.a.	n.a.	0.189457
LM64_VI_py6	Fakos	porphyry	sercicitic	pyrite	0	n.a.	482849	137.713	918.509	4.50244	4.13012	n.a.	n.a.	3.24402	60.043	0.10421	0.34781	n.a.	n.a.	0.0787774	8.32255	0.0357353	0.015278	10.1197	0.876392	0.149931	5.93328	0.0866025	42.4514	0.00150973	0.00778455	0.000756719	0.0102977	0.00636389	0.436001	0.000110941	0.000572039	0.000756719			n.a.	33.84	0.0372318	0.416025	1.08001	4.13012	n.a.	n.a.	0.550606
LM64_VI_py5	Fakos	porphyry	sercicitic	pyrite	0	n.a.	528138	59.2429	149.395	9.53361	5.79789	n.a.	n.a.	10.1616	272.641	0.3352	0.188297	n.a.	n.a.	1.81225	14.7384	0.493389	0.0213946	18.2353	2.37598	0.396551	14.9513	0.130296	5.8301	0.00117325	0.0993817	0.00565806	0.018382	0.0401058	4.60209	0.000361134	0.0305902	0.00565806			n.a.	31.7535	0.0595255	0.404208	0.619386	5.79789	n.a.	n.a.	0.310137
LM64_VI_py4	Fakos	porphyry	sercicitic	pyrite	0	n.a.	581810	217.548	293.34	41.8705	5.77814	n.a.	n.a.	40.5753	202.02	1.3774	0.132897	n.a.	n.a.	7.4432	45.191	1.5514	0.058417	45.5318	1.37023	0.741627	4.4369	0.0300939	5.36159	0.00128299	0.163473	0.00633146	0.0302513	0.00629851	0.928622	0.000268524	0.034214	0.00633146			n.a.	34.6799	0.0541779	0.466097	0.870156	5.77814	n.a.	n.a.	0.304943
LM64_VII_py1	Fakos	porphyry	sercicitic	pyrite	0	n.a.	447863	43.568	290.067	0.865085	5.95267	n.a.	n.a.	8.4067	141.487	0.036803	0.0954902	n.a.	n.a.	0.103269	0.391376	0.0149684	0.0141132	0.158048	0.0121301	0.1502	895.22	0.0767497	5.18253	0.089297	0.653403	0.000844725	0.23286	0.000278418	3.24751	0.000323935	0.00237029	0.000844725			n.a.	32.3538	0.0523601	0.406929	0.470907	5.95267	n.a.	n.a.	0.361125
LM64_VII_py5	Fakos	porphyry	sercicitic	pyrite	0	n.a.	466311	7.18194	115.336	0.824387	4.3216	n.a.	n.a.	7.57375	176.683	0.0666324	0.175717	n.a.	n.a.	0.155102	1.24857	0.862802	0.0149865	2.2016	0.701597	0.0622696	80.2519	0.318676	0.948267	0.00680711	0.0704498	0.00927778	0.0302655	0.0976891	24.601	0.0020867	0.0215962	0.00927778			n.a.	23.444	0.0584124	0.419534	0.73136	4.3216	n.a.	n.a.	0.293915
LM64_VII_py7	Fakos	porphyry	sercicitic	pyrite	0	n.a.	522908	332.913	396.056	4.73512	3.6125	n.a.	n.a.	85.0329	127.576	0.289509	0.182979	n.a.	n.a.	0.836951	35.7115	0.181827	0.0594731	30.5321	0.39051	0.840571	4.17842	0.0127902	3.91511	0.00194789	0.0274122	0.000869625	0.00948213	0.00117301	0.383211	0.000178645	0.00251403	0.000869625			n.a.	25.0448	0.0378817	0.460774	0.592928	3.6125	n.a.	n.a.	0.284094
LM64_VIII_py5	Fakos	porphyry	sercicitic	pyrite	0	n.a.	518187	51.7246	120.103	3.78793	3.97069	n.a.	n.a.	4.55823	125.023	0.112384	0.196013	n.a.	n.a.	0.739209	12.1058	0.111165	0.0105387	12.968	1.44456	0.430668	9.64088	0.111395	11.3475	0.000812675	0.0570027	0.00217274	0.00866628	0.027928	2.41708	0.000203747	0.0142913	0.00217274			n.a.	15.8783	0.0461011	0.484728	0.521001	3.97069	n.a.	n.a.	0.346977
LM64_VIII_py6	Fakos	porphyry	sercicitic	pyrite	0	n.a.	477736	260.561	874.929	34.4329	2.56387	n.a.	n.a.	7.27252	114.566	0.309591	0.102286	n.a.	n.a.	0.464441	70.9209	0.393853	0.0682869	27.0886	11.6701	0.297808	4.22931	0.43081	35.8282	0.00252087	0.0171453	0.00118817	0.0114288	0.0447881	0.439689	0.000262076	0.00178247	0.00118817			n.a.	19.258	0.0451586	0.419234	0.535459	2.56387	n.a.	n.a.	0.160359
LM64_VIII_py3	Fakos	porphyry	sercicitic	pyrite	0	n.a.	500624	99.8626	292.527	4.07749	4.21926	n.a.	n.a.	10.2885	163.877	0.801523	0.276007	n.a.	n.a.	1.57289	5.39113	0.170746	0.0224776	3.36681	0.278486	0.341379	48.6742	0.0827153	9.70625	0.00667624	0.467176	0.00802625	0.238066	0.0027887	1.64102	0.000225085	0.0157506	0.00802625			n.a.	13.1663	0.0398801	0.180437	1.31065	4.21926	n.a.	n.a.	0.652488
LM64_VIII_py2	Fakos	porphyry	sercicitic	pyrite	0	n.a.	467761	27.7511	174.179	5.52585	143.81	n.a.	n.a.	7.66771	92.6807	0.292535	0.21039	n.a.	n.a.	0.315022	13.5902	0.641973	0.0116393	7.11661	1.23305	0.159325	13.0232	0.173264	3.61921	0.00163551	0.0442657	0.0105414	0.0411059	0.0444325	3.33972	0.000419417	0.0113517	0.0105414			n.a.	34.2601	0.0730168	0.529241	0.884715	5.68642	n.a.	n.a.	0.383437
LM64_IX_py1.3	Fakos	porphyry	sercicitic	pyrite	0	n.a.	434376	17.0198	69.3701	5.09552	7.92524	n.a.	n.a.	2.77782	164.472	0.0593863	0.225132	n.a.	n.a.	0.195073	1.8201	0.0224841	0.00681608	4.84517	0.0104956	0.245348	33.9457	0.0021662	6.12704	0.00140678	0.0402614	0.00348925	0.0122568	0.000616668	9.66359	0.000400479	0.0114615	0.00348925			n.a.	24.5451	0.0502939	0.412408	0.616677	7.92524	n.a.	n.a.	0.267903
LM64_IX_py1.4	Fakos	porphyry	sercicitic	pyrite	0	n.a.	466825	32.606	142.619	1.8355	2.75603	n.a.	n.a.	2.86329	440.194	0.0438277	0.315625	n.a.	n.a.	0.0894717	1.67757	0.0359128	0.0120245	0.492783	0.0174225	0.228623	893.282	0.0353553	11.3876	0.0244012	0.181564	0.00134416	0.0889392	0.000534334	13.5004	0.000368781	0.00274403	0.00134416			n.a.	38.5265	0.0414967	0.471896	1.18032	2.75603	n.a.	n.a.	0.268337
LM64_IX_py1.4	Fakos	porphyry	sercicitic	pyrite	0	n.a.	474880	76.4332	681.052	306.983	3.65262	n.a.	n.a.	15.587	475.623	0.0509643	0.15123	n.a.	n.a.	0.318842	5.5521	0.0286609	0.0187637	5.70401	0.228133	0.112228	83.3839	0.0399952	4.90364	0.00328957	0.0558978	0.000666783	0.00893482	0.00298474	6.22272	0.000245492	0.0041715	0.000666783			n.a.	17.7994	0.0510971	0.279928	0.753792	3.65262	n.a.	n.a.	0.27725
LM64_X_py1	Fakos	porphyry	sercicitic	pyrite	0	n.a.	474007	108.602	279.195	1.02986	5.44466	n.a.	n.a.	1.35443	173.18	0.0427408	0.164077	n.a.	n.a.	0.205888	3.81195	0.0201828	0.0113894	0.789364	0.140917	0.388982	219.392	0.17852	80.1826	0.0144286	0.260828	0.000393556	0.054146	0.00129756	1.59464	0.000104873	0.00189581	0.000393556			n.a.	24.6532	0.0533666	0.393142	1.01044	5.44466	n.a.	n.a.	0.289072
LM64_X_py6	Fakos	porphyry	sercicitic	pyrite	0	n.a.	507164	120.475	317.048	5.81776	3.69231	n.a.	n.a.	6.90318	175.028	0.236808	0.186735	n.a.	n.a.	1.41528	24.6387	0.21214	0.0147827	8.6549	0.672822	0.37999	20.223	0.0777388	17.4521	0.00170801	0.163524	0.00196562	0.0273612	0.00558474	1.45282	0.000122703	0.0117475	0.00196562			n.a.	33.3838	0.0394615	0.357036	0.58936	3.69231	n.a.	n.a.	0.358814
LM64_XII_py1	Fakos	porphyry	sercicitic	pyrite	0	n.a.	459699	40.4528	214.034	6.54645	4.16528	n.a.	n.a.	8.30195	265.197	1.11197	0.175544	n.a.	n.a.	0.155928	17.9388	0.520921	0.016638	3.65286	1.09573	0.189001	72.6	0.299964	4.87268	0.00455479	0.0426867	0.027488	0.30441	0.0270866	6.55573	0.000411294	0.00385458	0.027488			n.a.	17.9117	0.0504184	0.28	0.616584	4.16528	n.a.	n.a.	0.18881
LM64_XII_py3	Fakos	porphyry	sercicitic	pyrite	0	n.a.	511028	59.4257	216.19	11.4494	8.58957	n.a.	n.a.	10.4796	233.962	2.00881	0.403591	n.a.	n.a.	2.77554	25.2615	0.350947	0.0269826	28.2356	3.07227	0.274877	8.28607	0.108808	5.67058	0.000955624	0.0982995	0.0338038	0.0711448	0.0516993	3.93705	0.000454056	0.0467061	0.0338038			n.a.	31.1654	0.0766448	0.413827	1.19708	8.58957	n.a.	n.a.	0.571029
minimum	0	0	0	0	0	0	413648	1.59344	31.4637	0.824387	2.56387	0	0	0.676478	38.796	0.0322234	0.0954902	0	0	0.0787278	0.391376	0.0149684	0.00681608	0.158048	0.0104956	0.0389302	0.527016	0.0021662	0.0178008	4.84594e-05	0.001347	0.000393556	0.00216716	0.000278418	0.266023	9.21252e-05	0.000572039	0.000393556
maximum	0	0	0	0	0	0	581810	332.913	918.509	1909.21	143.81	0	0	2663.88	475.623	10.5622	0.411169	0	0	15.8526	70.9209	1.63171	0.126879	475.193	19.5819	0.840571	895.22	1.14939	80.1826	0.089297	0.716593	1.01838	2.01709	0.412952	98.1602	0.0105008	0.334307	1.01838
SD	#DIV/0!	#DIV/0!	#DIV/0!	#DIV/0!	0	#DIV/0!	37755.4	86.6037	247.608	349.536	25.4603	#DIV/0!	#DIV/0!	484.773	103.087	2.58955	0.0840076	#DIV/0!	#DIV/0!	3.07509	18.571	0.436115	0.0267822	86.0627	4.16714	0.186313	225.699	0.276995	17.0178	0.0168507	0.191411	0.187132	0.415631	0.122942	18.8079	0.00205979	0.0625376	0.187132
MEDIAN	#NUM!	#NUM!	#NUM!	#NUM!	0	#NUM!	474649	59.3343	284.631	5.31069	4.27043	#NUM!	#NUM!	7.25118	138.045	0.301063	0.192155	#NUM!	#NUM!	0.488058	11.9857	0.212552	0.0177481	6.41031	0.687209	0.231845	15.9697	0.102599	8.97431	0.00265573	0.0637263	0.00407814	0.0359922	0.0089196	2.19176	0.00029623	0.0111175	0.00407814
[truncated: 108 more columns]

## Sheet: Fakos epithermal HS
sample ID Fakos II HS	loc Fakos II HS	type Fakos II HS	mineral Fakos II HS	texture Fakos II HS	Mn (ppm) Fakos II HS	Fe (ppm) Fakos II HS	Co (ppm) Fakos II HS	Ni (ppm) Fakos II HS	Cu (ppm) Fakos II HS	Zn (ppm) Fakos II HS	Ga (ppm) Fakos II HS	Ge (ppm) Fakos II HS	As (ppm) Fakos II HS	Se (ppm) Fakos II HS	Ag (ppm) Fakos II HS	Cd (ppm) Fakos II HS	In (ppm) Fakos II HS	Sn (ppm) Fakos II HS	Sb (ppm) Fakos II HS	Te (ppm) Fakos II HS	Au (ppm) Fakos II HS	Tl (ppm) Fakos II HS	Pb (ppm) Fakos II HS	Bi (ppm) Fakos II HS	Co/Ni (ppm) Fakos II HS	Se/Pb (ppm) Fakos II HS	Bi/Pb (ppm) Fakos II HS	Co/As (ppm) Fakos II HS	Tl/Pb (ppm) Fakos II HS	Sb/Pb (ppm) Fakos II HS	Ag/Co (ppm) Fakos II HS	Ag/Pb (ppm) Fakos II HS	Bi/Co (ppm) Fakos II HS	Se/Co (ppm) Fakos II HS	Tl/Co (ppm) Fakos II HS	Sb/Co (ppm) Fakos II HS	Ag/Co (ppm) Fakos II HS			Mn L.O.D. Howell Fakos II HS	Fe L.O.D. Howell Fakos II HS	Co L.O.D. Howell Fakos II HS	Ni L.O.D. Howell Fakos II HS	Cu L.O.D. Howell Fakos II HS	Zn L.O.D. Howell Fakos II HS	Ga L.O.D. Howell Fakos II HS	Ge L.O.D. Howell Fakos II HS	As L.O.D. Howell Fakos II HS	Se L.O.D. Howell Fakos II HS
LM29_I_py_1.1	Fakos	epithermal	pyrite	0	n.a.	461315	12.5003	126.578	166.466	71.5351	n.a.	n.a.	2.94925	64.6585	8.93745	0.303009	n.a.	n.a.	1.2225	33.9846	2.57787	0.0588674	1820.96	7.99979	0.0987558	0.0355078	0.00439316	4.23846	3.23276e-05	0.000671347	0.71498	0.00490809	0.639968	5.17256	0.00470928	0.0977977	0.71498			n.a.	14.0054	0.0332581	0.373262	0.453385	3.41247	n.a.	n.a.	0.2465	2.529
LM29_I_py_1.2	Fakos	epithermal	pyrite	0	n.a.	504089	7.98322	184.431	75.1961	36.9151	n.a.	n.a.	31.4341	104.723	10.7201	0.46208	n.a.	n.a.	148.409	3.19359	0.389341	0.807356	3686.76	7.63518	0.0432857	0.0284053	0.00207097	0.253967	0.000218988	0.0402547	1.34283	0.00290773	0.956403	13.1179	0.101132	18.5902	1.34283			n.a.	41.2524	0.135691	0.803809	1.14921	14.3893	n.a.	n.a.	0.927719	4.04226
LM29_I_py_1.3	Fakos	epithermal	pyrite	0	n.a.	526525	213.791	1796.72	1189.87	2.19045	n.a.	n.a.	30.6634	11.9654	13.6219	0.124575	n.a.	n.a.	1.16849	14.9554	0.564912	0.202852	33.8165	57.9038	0.118989	0.353834	1.7123	6.97218	0.00599861	0.0345539	0.0637161	0.402818	0.270843	0.0559679	0.000948834	0.00546559	0.0637161			n.a.	13.7223	0.036138	0.270166	0.659413	2.19045	n.a.	n.a.	0.205525	1.07983
LM29_I_py_1.6	Fakos	epithermal	pyrite	0	n.a.	447951	65.7652	563.114	63.1298	3.38182	n.a.	n.a.	212.895	6.21274	3.55125	0.161408	n.a.	n.a.	9.66373	13.3275	0.260536	0.029567	13.9998	0.846125	0.116788	0.443773	0.0604384	0.30891	0.00211195	0.690276	0.053999	0.253664	0.0128659	0.0944685	0.000449584	0.146943	0.053999			n.a.	14.3631	0.0397278	0.338472	0.569697	3.38182	n.a.	n.a.	0.269305	1.36605
LM29_I_py_3	Fakos	epithermal	pyrite	0	n.a.	448107	0.0956869	56.4668	2.46589	3.20335	n.a.	n.a.	0.320004	38.5335	0.0245091	0.269203	n.a.	n.a.	0.172226	0.251032	0.0196546	0.0105054	0.127101	0.0540641	0.00169457	303.172	0.425363	0.299018	0.0826537	1.35503	0.256138	0.192831	0.565011	402.704	0.109789	1.79989	0.256138			n.a.	17.6686	0.0453679	0.322825	0.475495	3.20335	n.a.	n.a.	0.320004	1.78857
LM29_I_py_5	Fakos	epithermal	pyrite	0	n.a.	471460	0.0366508	2.75697	1019.03	3.36799	n.a.	n.a.	0.210904	48.3467	0.423363	0.198505	n.a.	n.a.	0.158597	2.43723	0.0522743	0.00665406	0.581837	3.03678	0.0132939	83.0932	5.2193	0.17378	0.0114363	0.27258	11.5513	0.727631	82.8572	1319.12	0.181553	4.32725	11.5513			n.a.	19.3235	0.0366508	0.243241	0.527846	3.36799	n.a.	n.a.	0.210904	1.7927
LM29_I_py_2	Fakos	epithermal	pyrite	0	n.a.	453406	0.0410502	10.741	534.093	4.56609	n.a.	n.a.	0.251869	2.90687	2.38826	0.087807	n.a.	n.a.	0.287062	2.23947	0.128548	0.0111797	1.65954	8.66374	0.00382182	1.75162	5.22058	0.162983	0.00673664	0.172977	58.1789	1.43911	211.052	70.8125	0.272342	6.99293	58.1789			n.a.	11.4049	0.0285563	0.279787	0.483556	4.56609	n.a.	n.a.	0.176401	1.72433
LM29_III_py_1	Fakos	epithermal	pyrite	0	n.a.	459134	1810.57	5996.31	662.104	13.9102	n.a.	n.a.	52.0134	44.6732	36.9058	0.100222	n.a.	n.a.	0.96785	38.3289	0.391053	0.0942204	98.0318	146.632	0.301947	0.455701	1.49576	34.8097	0.00096112	0.00987281	0.0203836	0.376468	0.0809868	0.0246735	5.20391e-05	0.000534555	0.0203836			n.a.	23.1474	0.0416695	0.49189	0.782229	3.47942	n.a.	n.a.	0.277477	1.77057
LM29_III_py_2	Fakos	epithermal	pyrite	0	n.a.	447497	0.156828	0.755956	630.187	3.41661	n.a.	n.a.	0.231621	27.2086	0.044345	0.137725	n.a.	n.a.	0.078179	2.0791	0.0578562	0.0104775	0.0931002	9.638	0.207457	292.251	103.523	0.67709	0.11254	0.839729	0.282762	0.476314	61.4559	173.493	0.0668091	0.498502	0.282762			n.a.	14.7267	0.0409448	0.188218	0.519343	3.41661	n.a.	n.a.	0.231621	2.11708
LM29_III_py_4	Fakos	epithermal	pyrite	0	n.a.	428116	1.4497	6.44191	485.726	4.2671	n.a.	n.a.	0.375403	5.29023	1.34184	0.118331	n.a.	n.a.	0.169153	3.27568	0.114388	0.0105496	3.26384	8.08375	0.225042	1.62086	2.47676	3.86172	0.00323226	0.0518266	0.925599	0.411125	5.57614	3.64918	0.00727706	0.116681	0.925599			n.a.	14.8258	0.0526024	0.349684	0.569238	4.2671	n.a.	n.a.	0.192634	1.38318
LM29_III_py_5	Fakos	epithermal	pyrite	0	n.a.	451763	0.0480007	1.1914	1259.71	2.64921	n.a.	n.a.	0.293174	265.772	0.0270243	0.187995	n.a.	n.a.	0.0761265	0.349245	0.0343937	0.00657842	0.144321	0.673222	0.0402894	1841.53	4.66476	0.163728	0.0455819	0.527481	0.562997	0.187251	14.0253	5536.83	0.137048	1.58595	0.562997			n.a.	11.677	0.0480007	0.295667	0.477878	2.64921	n.a.	n.a.	0.293174	1.91148
LM29_V_py_1.1	Fakos	epithermal	pyrite	0	n.a.	439050	9.75783	62.7045	1105.6	3.68517	n.a.	n.a.	0.544063	66.1025	1.22327	0.261382	n.a.	n.a.	0.363386	0.854145	0.0478813	0.0114765	1.01652	19.361	0.155616	65.0283	19.0464	17.9351	0.01129	0.357481	0.125363	1.20339	1.98416	6.77431	0.00117613	0.0372405	0.125363			n.a.	19.7785	0.0388708	0.272507	0.541063	3.68517	n.a.	n.a.	0.476369	1.94113
LM29_V_py_1.2	Fakos	epithermal	pyrite	0	n.a.	427826	2.16113	3.34678	360.019	3.81323	n.a.	n.a.	0.33085	13.631	0.041032	0.203059	n.a.	n.a.	0.0682594	0.354809	0.0243866	0.0161459	0.207637	1.75828	0.645734	65.6482	8.46806	6.53206	0.0777605	0.328744	0.0189863	0.197614	0.813593	6.30734	0.00747106	0.031585	0.0189863			n.a.	18.548	0.0427707	0.204957	0.564511	3.81323	n.a.	n.a.	0.33085	1.63431
LM29_V_py_1.3	Fakos	epithermal	pyrite	0	n.a.	446561	0.0753178	20.686	1368.91	2.70659	n.a.	n.a.	1.08275	15.3788	14.6518	0.182025	n.a.	n.a.	1.01733	10.0671	0.52135	0.00733499	5.51889	50.8856	0.003641	2.78657	9.22025	0.0695615	0.00132907	0.184337	194.533	2.65484	675.612	204.185	0.0973873	13.5072	194.533			n.a.	15.8775	0.0322717	0.297297	0.558151	2.70659	n.a.	n.a.	0.325306	2.62747
LM29_VII_py_1	Fakos	epithermal	pyrite	0	n.a.	434357	0.40564	26.9351	1632.08	2.53976	n.a.	n.a.	0.630644	81.9611	2.33769	0.102297	n.a.	n.a.	0.660445	10.027	0.335272	0.00763326	3.30252	23.4172	0.0150599	24.8178	7.0907	0.643216	0.00231134	0.199982	5.76296	0.707851	57.7289	202.054	0.0188178	1.62815	5.76296			n.a.	13.7022	0.0351005	0.178903	0.347994	2.23242	n.a.	n.a.	0.278086	1.61431
LM29_VII_py_3	Fakos	epithermal	pyrite	0	n.a.	461855	52.6443	329.646	5890.66	4.68937	n.a.	n.a.	18.1802	160.253	16.9692	0.0950162	n.a.	n.a.	27.1224	17.2069	0.47972	0.0817624	145.986	54.8175	0.159699	1.09772	0.375498	2.89568	0.000560069	0.185788	0.322336	0.116238	1.04128	3.04407	0.00155311	0.515202	0.322336			n.a.	15.5411	0.0271932	0.217877	0.425322	3.13845	n.a.	n.a.	0.206252	2.20135
LM29_IX_py_1.1	Fakos	epithermal	pyrite	0	n.a.	444279	0.0496106	0.27145	123.258	2.3296	n.a.	n.a.	0.222411	2.32393	0.02502	0.158458	n.a.	n.a.	0.0367309	0.410347	0.0168718	0.0111623	0.137492	0.789488	0.182761	16.9023	5.74205	0.223059	0.0811847	0.267148	0.504328	0.181974	15.9137	46.8434	0.224998	0.740383	0.504328			n.a.	16.1613	0.0496106	0.27145	0.595839	2.3296	n.a.	n.a.	0.222411	1.25392
LM29_IX_py_1.2	Fakos	epithermal	pyrite	0	n.a.	472948	1.74709	9.73049	521.26	3.58167	n.a.	n.a.	0.307973	90.0213	0.0351734	0.165296	n.a.	n.a.	0.047831	0.13528	0.0262999	0.014743	0.140116	0.0944859	0.179547	642.476	0.674339	5.67285	0.10522	0.341367	0.0201326	0.25103	0.054082	51.5266	0.00843862	0.0273776	0.0201326			n.a.	34.7449	0.0443378	0.402404	0.589829	3.58167	n.a.	n.a.	0.307973	2.05757
LM29_IX_py_1.3	Fakos	epithermal	pyrite	0	n.a.	422973	30.0258	71.9007	603.452	2.38203	n.a.	n.a.	47.1684	59.8794	0.090913	0.0953318	n.a.	n.a.	5.74835	0.286632	0.115652	0.00820931	1.84954	26.9025	0.417601	32.3752	14.5455	0.636566	0.00443855	3.10798	0.00302783	0.0491542	0.895978	1.99426	0.000273408	0.191447	0.00302783			n.a.	17.4311	0.0319315	0.173377	0.401219	2.38203	n.a.	n.a.	0.199932	2.11376
LM29_X_py_1	Fakos	epithermal	pyrite	0	n.a.	423216	0.0488194	1.24677	562.995	2.17229	n.a.	n.a.	0.174603	3.9776	0.067707	0.16325	n.a.	n.a.	0.0691708	2.19585	0.0325539	0.0106414	0.0587106	5.6615	0.0391568	67.7492	96.4306	0.279603	0.181251	1.17816	1.38689	1.15323	115.968	81.4757	0.217974	1.41687	1.38689			n.a.	22.6312	0.0473765	0.196811	0.550294	2.17229	n.a.	n.a.	0.174603	0.717488
LM29_X_py_2	Fakos	epithermal	pyrite	0	n.a.	385683	0.0309652	7.35443	584.144	3.00584	n.a.	n.a.	0.490365	4.21975	0.898126	0.108445	n.a.	n.a.	0.829941	4.57438	0.108605	0.00853135	0.412797	20.4145	0.00421042	10.2223	49.454	0.0631474	0.0206672	2.01053	29.0043	2.17571	659.271	136.274	0.275514	26.8023	29.0043			n.a.	15.5517	0.0309652	0.224407	0.505574	3.00584	n.a.	n.a.	0.259081	1.08579
LM29_XI_py_6	Fakos	epithermal	pyrite	0	n.a.	350756	0.0573237	3.77514	881.812	3.447	n.a.	n.a.	0.207927	163.733	0.411431	0.182593	n.a.	n.a.	0.0787694	2.24044	0.0167611	0.00770044	0.70288	5.28304	0.0151845	232.946	7.51627	0.275692	0.0109555	0.112067	7.17732	0.58535	92.1615	2856.29	0.134333	1.37411	7.17732			n.a.	14.4483	0.0265451	0.195457	0.518369	3.447	n.a.	n.a.	0.207927	1.66943
LM29_XI_py_8	Fakos	epithermal	pyrite	0	n.a.	362964	85.9647	200.371	599.414	3.61377	n.a.	n.a.	3.3519	38.9861	1.47829	0.110061	n.a.	n.a.	8.69079	2.16113	0.137371	0.0190161	452.462	15.3544	0.429028	0.0861642	0.0339352	25.6466	4.2028e-05	0.0192078	0.0171964	0.00326721	0.178613	0.453513	0.000221208	0.101097	0.0171964			n.a.	14.6882	0.0213262	0.246191	0.33672	3.61377	n.a.	n.a.	0.228434	0.623281
minimum	0	0	0	0	0	350756	0.0309652	0.27145	2.46589	2.17229	0	0	0.174603	2.32393	0.0245091	0.087807	0	0	0.0367309	0.13528	0.0167611	0.00657842	0.0587106	0.0540641	0.00169457	0.0284053	0.00207097	0.0631474	3.23276e-05	0.000671347	0.00302783	0.00290773	0.0128659	0.0246735	5.20391e-05	0.000534555	0.00302783
maximum	0	0	0	0	0	526525	1810.57	5996.31	5890.66	71.5351	0	0	212.895	265.772	36.9058	0.46208	0	0	148.409	38.3289	2.57787	0.807356	3686.76	146.632	0.645734	1841.53	103.523	34.8097	0.181251	3.10798	194.533	2.65484	675.612	5536.83	0.275514	26.8023	194.533
SD	#DIV/0!	#DIV/0!	#DIV/0!	0	#DIV/0!	38822.6	376.014	1275.71	1177.74	15.6222	#DIV/0!	#DIV/0!	45.4413	65.3531	8.76004	0.0864352	#DIV/0!	#DIV/0!	30.9723	10.474	0.53202	0.168297	837.616	32.5647	0.166622	396.961	28.8361	9.05668	0.0492611	0.753048	41.5814	0.699547	190.487	1270.05	0.0959904	6.89365	41.5814
MEDIAN	#NUM!	#NUM!	#NUM!	0	#NUM!	447497	1.4497	20.686	599.414	3.41661	#NUM!	#NUM!	0.490365	38.9861	1.22327	0.161408	#NUM!	#NUM!	0.363386	2.24044	0.114388	0.0111623	1.65954	8.08375	0.116788	16.9023	5.2193	0.636566	0.00673664	0.267148	0.504328	0.376468	1.98416	46.8434	0.0188178	0.515202	0.504328
[truncated: 107 more columns]

## Sheet: Fakos trans
sample ID Fakos trans	loc Fakos trans	type Fakos trans	subtype Fakos trans	mineral Fakos trans	texture Fakos trans	Mn (ppm) Fakos trans	Fe (ppm) Fakos trans	Co (ppm) Fakos trans	Ni (ppm) Fakos trans	Cu (ppm) Fakos trans	Zn (ppm) Fakos trans	Ga (ppm) Fakos trans	Ge (ppm) Fakos trans	As (ppm) Fakos trans	Se (ppm) Fakos trans	Ag (ppm) Fakos trans	Cd (ppm) Fakos trans	In (ppm) Fakos trans	Sn (ppm) Fakos trans	Sb (ppm) Fakos trans	Te (ppm) Fakos trans	Au (ppm) Fakos trans	Tl (ppm) Fakos trans	Pb (ppm) Fakos trans	Bi (ppm) Fakos trans	Co/Ni (ppm) Fakos trans	Se/Pb (ppm) Fakos trans	Bi/Pb (ppm) Fakos trans	Co/As (ppm) Fakos trans	Tl/Pb (ppm) Fakos trans	Sb/Pb (ppm) Fakos trans	Ag/Co (ppm) Fakos trans	Ag/Pb (ppm) Fakos trans	Bi/Co (ppm) Fakos trans	Se/Co (ppm) Fakos trans	Tl/Co (ppm) Fakos trans	Sb/Co (ppm) Fakos trans	Ag/Co (ppm) Fakos trans	Fakos trans	Fakos trans	Mn L.O.D. Howell Fakos trans	Fe L.O.D. Howell Fakos trans	Co L.O.D. Howell Fakos trans	Ni L.O.D. Howell Fakos trans	Cu L.O.D. Howell Fakos trans	Zn L.O.D. Howell Fakos trans	Ga L.O.D. Howell Fakos trans	Ge L.O.D. Howell Fakos trans	As L.O.D. Howell Fakos trans
LM-JB-03-01	Fakos	epithermal	transitional	pyrite	euhedral	16.014	506180	496.209	189.348	12.1017	0.998927	0.0623608	0.568709	532.467	100.887	0.0290871	0.136548	0.0108623	0.109964	0.051584	23.3743	0.0149241	0.019782	10.5668	2.00867	2.62061	9.54753	0.190092	0.931905	0.00187208	0.00488169	5.86186e-05	0.00275267	0.00404803	0.203316	3.98663e-05	0.000103956	5.86186e-05			0.218973	10.3753	0.0269157	0.258888	0.175972	0.998927	0.0623608	0.34962	0.243839
LM-JB-03-02	Fakos	epithermal	transitional	pyrite	euhedral	16.0743	468838	296.726	167.167	4.55879	1.44955	0.0535802	0.486989	1041.89	199.174	0.0200791	0.235825	0.00744728	0.139919	0.045639	7.09645	0.0332366	0.0110894	4.14054	0.904979	1.77503	48.1035	0.218566	0.284795	0.00267825	0.0110225	6.76686e-05	0.00484939	0.00304988	0.671239	3.73725e-05	0.000153808	6.76686e-05			0.331777	9.59622	0.0514392	0.378407	0.307671	1.44955	0.0535802	0.486989	0.380672
LM-JB-03-03	Fakos	epithermal	transitional	pyrite	euhedral	16.9628	479187	219.892	122.022	3.45383	1.29193	0.0344076	0.698271	916.034	114.637	0.0691368	0.141533	0.0056306	0.365042	0.47856	69.0829	0.344386	0.0210496	37.4402	5.47897	1.80207	3.06185	0.146339	0.240048	0.000562218	0.012782	0.000314413	0.00184659	0.0249166	0.521332	9.5727e-05	0.00217635	0.000314413			0.156371	9.75204	0.0322224	0.367912	0.231162	1.29193	0.0344076	0.352353	0.206153
LM-JB-03-04	Fakos	epithermal	transitional	pyrite	euhedral	16.2108	505920	146.634	83.4375	0.299545	1.25361	0.0367376	0.494048	914.964	368.711	0.0181868	0.251385	0.0180579	0.0919792	0.058363	1.21558	0.000552272	0.0125969	0.174241	0.0372547	1.75741	2116.1	0.213811	0.160262	0.072296	0.334956	0.000124029	0.104378	0.000254066	2.5145	8.59072e-05	0.000398019	0.000124029			0.21996	4.91956	0.0220747	0.327981	0.221498	1.25361	0.0367376	0.494048	0.243834
LM-JB-03-05	Fakos	epithermal	transitional	pyrite	euhedral	15.388	498718	9.5036	275.607	8.51514	1.061	0.0479396	0.513741	314.983	12.3167	0.0246798	0.122197	0.0116892	0.094423	1.12288	0.2188	0.0343737	0.0121848	22.8356	0.0637276	0.0344824	0.539365	0.00279071	0.0301718	0.000533589	0.0491724	0.00259689	0.00108076	0.00670563	1.29601	0.00128213	0.118153	0.00259689			0.289051	9.97945	0.0403265	0.189491	0.183668	1.061	0.0479396	0.513741	0.234442
LM-JB-03-06	Fakos	epithermal	transitional	pyrite	euhedral	26.637	472107	462.077	61.3362	8.80932	1.39264	0.24097	1.43216	559.85	76.8218	0.0842038	0.0898936	0.0179838	0.128344	0.625622	12.1794	0.0946745	0.0290419	109.514	7.71979	7.53351	0.701478	0.0704911	0.825358	0.000265188	0.0057127	0.000182229	0.000768884	0.0167067	0.166253	6.28508e-05	0.00135394	0.000182229			0.28153	9.76034	0.0285163	0.232787	0.284349	1.39264	0.0492158	0.295464	0.174872
LM-JB-03-07	Fakos	epithermal	transitional	pyrite	euhedral	15.3315	498013	654.787	47.3501	22.6317	0.995471	0.0561187	0.688213	305.621	62.7842	0.0435965	0.124923	0.0163974	0.145325	0.184315	17.1425	0.0263107	0.0182648	6.38439	0.357169	13.8286	9.83402	0.0559441	2.14248	0.00286086	0.0288695	6.65811e-05	0.0068286	0.000545473	0.0958849	2.78943e-05	0.000281488	6.65811e-05			0.2688	6.8751	0.028291	0.294074	0.212055	0.995471	0.0561187	0.401499	0.189608
LM-JB-03-08	Fakos	epithermal	transitional	pyrite	euhedral	16.1317	488997	1960.61	64.175	38.8329	1.05344	0.0361009	0.543859	390.061	47.0115	0.197223	0.209406	0.0107557	0.139823	0.163704	11.6325	0.0452256	0.0159274	52.8619	9.96168	30.551	0.889326	0.188447	5.02642	0.000301302	0.00309682	0.000100593	0.00373091	0.0050809	0.023978	8.1237e-06	8.34964e-05	0.000100593			0.224328	7.84088	0.0497975	0.279885	0.224821	1.05344	0.0361009	0.396216	0.19966
LM-JB-03-09	Fakos	epithermal	transitional	pyrite	euhedral	14.996	479119	1226.04	16.3416	0.861285	0.800658	0.0367239	0.567204	488.033	238.311	0.037233	0.0904761	0.0124566	0.0733319	0.0601253	53.4886	0.1029	0.0124291	2.71996	0.330067	75.0253	87.6158	0.12135	2.5122	0.00456961	0.0221052	3.03686e-05	0.0136888	0.000269215	0.194375	1.01377e-05	4.90403e-05	3.03686e-05			0.282767	15.1656	0.0328794	0.378184	0.22091	0.800658	0.0367239	0.567204	0.295365
LM-JB-03-10	Fakos	epithermal	transitional	pyrite	euhedral	62.6771	455376	771.159	331.864	40.6988	4.92359	0.145021	0.57788	2043.92	107.22	0.379489	0.193797	0.00866604	0.154318	0.881466	33.6877	0.353305	0.0221966	135.501	39.8829	2.32372	0.791281	0.294336	0.377295	0.000163811	0.00650522	0.000492102	0.00280063	0.0517181	0.139037	2.87835e-05	0.00114304	0.000492102			0.275491	9.86585	0.0303623	0.294611	0.171689	1.12766	0.0406459	0.57788	0.224592
LM-JB-03-11	Fakos	epithermal	transitional	pyrite	euhedral	15.3347	474468	310.444	386.033	0.22508	0.933152	0.0669077	0.581661	809.757	75.0503	0.0345789	0.223703	0.0134936	0.0851366	0.0344649	1.44088	0.0243359	0.0157409	0.322683	0.0656246	0.804192	232.582	0.203371	0.383379	0.0487814	0.106807	0.000111385	0.10716	0.000211389	0.241751	5.07046e-05	0.000111018	0.000111385			0.230636	13.9924	0.0635007	0.295779	0.22508	0.933152	0.0669077	0.389944	0.264881
LM-JB-03-12	Fakos	epithermal	transitional	pyrite	euhedral	15.069	491274	115.77	3594.58	1.56073	1.54055	0.063382	0.730079	3505.43	190.081	0.07187	0.260597	0.0149388	0.0809514	0.0978055	0.889212	0.0634999	0.0142853	6.43304	1.13677	0.0322067	29.5477	0.176709	0.0330258	0.00222062	0.0152036	0.000620802	0.011172	0.00981928	1.64189	0.000123394	0.000844829	0.000620802			0.278235	4.06849	0.0412577	0.324268	0.26671	1.54055	0.063382	0.456011	0.224518
LM-JB-03-13	Fakos	epithermal	transitional	pyrite	subhedral	14.7908	492395	312.337	110.235	0.303412	0.937585	0.0264662	0.755348	391.158	146.151	0.0373143	0.163344	0.00970484	0.120947	0.0437241	43.0377	0.0333553	0.0158768	0.269681	0.0347418	2.83337	541.94	0.128825	0.798494	0.0588724	0.162133	0.000119468	0.138364	0.000111232	0.467927	5.08322e-05	0.00013999	0.000119468			0.229482	8.69765	0.0401464	0.380431	0.303412	0.937585	0.0264662	0.337173	0.272611
LM-JB-03-14	Fakos	epithermal	transitional	pyrite	subhedral	15.7266	472709	1080.23	38.4462	3.33173	1.27006	0.0269489	0.837424	978.958	129.434	0.0667729	0.089625	0.00499516	0.104439	0.248213	101.342	0.542146	0.0244945	27.5533	4.53058	28.0973	4.69758	0.16443	1.10345	0.000888984	0.00900845	6.18134e-05	0.00242341	0.00419408	0.11982	2.26752e-05	0.000229777	6.18134e-05			0.316267	6.41606	0.0285593	0.270707	0.2061	1.27006	0.0269489	0.366169	0.239847
LM-JB-03-15	Fakos	epithermal	transitional	pyrite	subhedral	16.5804	511816	34.4514	58.5752	2.91936	1.02171	0.0365618	0.678329	807.363	243.901	0.0626288	0.102421	0.0066722	0.124281	0.0483132	3.24855	0.0227506	0.0157265	21.1999	4.61688	0.588158	11.5048	0.217778	0.0426716	0.000741822	0.00227894	0.00181789	0.0029542	0.134011	7.07957	0.000456484	0.00140236	0.00181789			0.266616	11.0859	0.0420902	0.560518	0.136114	0.542776	0.0365618	0.316648	0.28563
LM-JB-03-16	Fakos	epithermal	transitional	pyrite	subhedral	16.0681	498922	443.742	58.1175	0.445224	1.2645	0.0846073	0.56572	762.834	123.647	0.0300676	0.22153	0.0122169	0.120293	0.0494525	28.8944	0.0847369	0.0128254	7.14998	1.37053	7.63525	17.2934	0.191682	0.581702	0.00179377	0.00691645	6.77592e-05	0.00420527	0.00308857	0.278647	2.89029e-05	0.000111444	6.77592e-05			0.297059	9.07564	0.0462528	0.379946	0.1979	1.2645	0.0846073	0.56572	0.232996
LM-JB-03-17	Fakos	epithermal	transitional	pyrite	subhedral	15.5844	517290	430.582	43.369	1.23255	0.696212	0.0510426	0.609553	844.785	144.618	0.0137035	0.0038473	0.00662761	0.106436	0.0482508	61.3496	0.296722	0.016827	11.734	3.15284	9.92835	12.3247	0.268693	0.509695	0.00143404	0.00411206	3.18255e-05	0.00116785	0.00732227	0.335865	3.90796e-05	0.000112059	3.18255e-05			0.348596	8.12702	0.0220633	0.250315	0.193299	0.696212	0.0510426	0.609553	0.282143
LM-JB-03-18	Fakos	epithermal	transitional	pyrite	subhedral	15.4596	473000	647.063	172.606	1.43835	1.45568	0.0454401	0.581405	500.196	165.042	0.0379686	0.200598	0.0114448	0.0795548	0.0610759	63.9393	0.181805	0.0210424	9.47785	1.77452	3.7488	17.4135	0.187228	1.29362	0.00222017	0.00644407	5.86785e-05	0.00400604	0.00274243	0.255063	3.25199e-05	9.43894e-05	5.86785e-05			0.242866	9.21594	0.0565628	0.236887	0.226785	1.08847	0.0454401	0.363153	0.328182
LM-JB-14-01	Fakos	epithermal	transitional	pyrite	anhedral, inclusions	15.363	486648	464.771	225.042	0.20656	1.14624	0.178532	1.13971	486.068	102.448	0.0226014	0.161239	0.00508955	0.150371	0.0509532	1.5186	0.111276	0.0181503	1.25611	2.42339	2.06526	81.5595	1.92928	0.956186	0.0144496	0.0405642	4.86291e-05	0.0179931	0.00521416	0.220427	3.90521e-05	0.000109631	4.86291e-05			0.307321	6.97457	0.0265675	0.178268	0.20656	1.14624	0.0545609	0.398031	0.181122
LM-JB-14-02	Fakos	epithermal	transitional	pyrite	anhedral, inclusions	17.2662	488510	166.98	189.104	0.26693	0.822528	0.0293731	0.667588	393.597	115.454	0.0228226	0.244708	0.0120482	0.125934	0.0652682	0.717009	0.0356735	0.0196875	0.560873	0.894685	0.883006	205.847	1.59516	0.424241	0.0351015	0.116369	0.000136679	0.0406913	0.00535804	0.691424	0.000117903	0.000390875	0.000136679			0.287791	11.2635	0.0274868	0.318307	0.236188	0.822528	0.0293731	0.328379	0.168173
LM-JB-14-03	Fakos	epithermal	transitional	pyrite	anhedral, inclusions	15.6717	473360	191.45	986.566	0.444257	1.18497	0.0447428	1.09426	264.328	83.1332	0.02748	0.196325	0.0043681	0.144859	0.0476949	0.273341	0.0130721	0.0110813	0.0363428	0.0167941	0.194057	2287.47	0.462103	0.724287	0.304911	1.31236	0.000143536	0.756134	8.77207e-05	0.43423	5.7881e-05	0.000249125	0.000143536			0.274188	9.27544	0.0381965	0.17748	0.169988	1.18497	0.0447428	0.301976	0.233439
LM-JB-14-04	Fakos	epithermal	transitional	pyrite	anhedral, inclusions	16.344	498146	78.7872	359.505	0.229095	1.05829	0.0306737	0.616792	124.72	197.346	0.0256643	0.218194	0.0100136	0.0936753	0.034348	0.388632	0.0219978	0.0127631	0.0904747	0.299407	0.219155	2181.23	3.30929	0.631712	0.141068	0.379642	0.000325742	0.283663	0.0038002	2.5048	0.000161994	0.000435959	0.000325742			0.170741	7.43384	0.0378123	0.212234	0.229095	1.05829	0.0306737	0.317245	0.151798
LM-JB-14-05	Fakos	epithermal	transitional	pyrite	anhedral, inclusions	16.4772	473278	243.903	644.729	0.161396	0.858597	0.0490142	0.663774	69.753	68.7859	0.0193333	0.18068	0.00947876	0.099277	0.0594717	0.525495	0.0181589	0.00936516	0.0314373	0.19737	0.378304	2188.03	6.2782	3.49668	0.297899	1.89175	7.92664e-05	0.61498	0.000809214	0.282021	3.8397e-05	0.000243833	7.92664e-05			0.219823	8.52566	0.0254347	0.258086	0.161396	0.858597	0.0490142	0.337842	0.130573
LM-JB-14-06	Fakos	epithermal	transitional	pyrite	anhedral, inclusions	15.1027	470046	160.464	529.872	0.189663	0.923966	0.0481507	0.78623	531.878	124.68	0.0333104	0.174393	0.00988402	0.105427	0.0675098	1.98532	0.4559	0.0217316	0.271507	0.0846712	0.302835	459.216	0.311857	0.301693	0.0800407	0.248649	0.000207589	0.122687	0.000527666	0.776999	0.00013543	0.000420717	0.000207589			0.262516	5.69035	0.038365	0.285207	0.189663	0.923966	0.0481507	0.295606	0.160831
LM-JB-14-07	Fakos	epithermal	transitional	pyrite	anhedral, inclusions	15.6028	471273	268.118	371.413	0.160274	1.32619	0.0316853	1.05296	124.854	77.5292	0.0335333	0.131724	0.00856798	0.11982	0.0722202	0.162284	0.0490028	0.0163678	0.020153	0.0280745	0.721887	3847.03	1.39307	2.14745	0.812174	3.58359	0.000125069	1.66394	0.000104709	0.28916	6.10468e-05	0.000269359	0.000125069			0.41713	6.5981	0.0299415	0.255951	0.160274	1.32619	0.0316853	0.293921	0.22161
LM-JB-14-08	Fakos	epithermal	transitional	pyrite	anhedral, inclusions	16.5756	494675	106.169	495.43	0.204949	1.21385	0.0265183	0.882269	761.448	153.577	0.0297225	0.190555	0.0074694	0.100978	0.068035	0.404877	0.080024	0.0110586	0.389474	0.109913	0.214298	394.32	0.282209	0.139431	0.0283937	0.174685	0.000279954	0.0763146	0.00103526	1.44653	0.00010416	0.000640816	0.000279954			0.380455	10.6302	0.0245588	0.392461	0.175796	1.21385	0.0265183	0.367977	0.253841
LM-JB-14-09	Fakos	epithermal	transitional	pyrite	subhedral	18.827	475663	481.22	1123.83	2.95868	1.21289	0.0831583	1.03103	252.578	109.676	1.59929	0.180433	0.00969102	0.129953	15.1849	6.16097	0.0334134	0.757868	30.389	3.48415	0.428197	3.60906	0.114652	1.90523	0.0249389	0.499683	0.00332341	0.0526273	0.00724025	0.227912	0.00157489	0.031555	0.00332341			0.217395	8.81037	0.0472569	0.236245	0.117285	1.21289	0.0710977	0.23206	0.244351
LM-JB-14-10	Fakos	epithermal	transitional	pyrite	subhedral	16.2109	489418	841.037	765.882	0.359749	0.846139	0.0385843	0.494654	258.85	102.922	0.033437	0.119729	0.0126808	0.087478	0.0575609	3.8259	0.0380983	0.0183833	85.3586	1.86795	1.09813	1.20576	0.0218835	3.24912	0.000215366	0.000674342	3.97569e-05	0.000391724	0.002221	0.122375	2.18579e-05	6.84404e-05	3.97569e-05			0.280999	7.09524	0.0612619	0.375076	0.219918	0.846139	0.0385843	0.397594	0.189658
LM-JB-14-11	Fakos	epithermal	transitional	pyrite	anhedral, inclusions	20.0687	470879	57.1731	1432.01	24.455	2.30173	0.498395	0.615202	1829.02	1.50585	4.55185	0.202435	0.00644813	1.44194	197.82	3.28888	0.370645	5.09172	536.883	25.4989	0.0399251	0.00280481	0.0474944	0.0312588	0.00948384	0.368459	0.0796153	0.00847828	0.445996	0.0263385	0.089058	3.46002	0.0796153			0.264194	9.77912	0.0345373	0.224167	0.234834	1.3177	0.0540313	0.479731	0.150339
[truncated: 7 more rows]
[truncated: 101 more columns]

## Sheet: Fakos epithermal IS
sample ID Fakos II IS-LS	loc Fakos II IS-LS	type Fakos II IS-LS	mineral Fakos II IS-LS	texture Fakos II IS-LS	Mn (ppm) Fakos II IS-LS	Fe (ppm) Fakos II IS-LS	Co (ppm) Fakos II IS-LS	Ni (ppm) Fakos II IS-LS	Cu (ppm) Fakos II IS-LS	Zn (ppm) Fakos II IS-LS	Ga (ppm) Fakos II IS-LS	Ge (ppm) Fakos II IS-LS	As (ppm) Fakos II IS-LS	Se (ppm) Fakos II IS-LS	Ag (ppm) Fakos II IS-LS	Cd (ppm) Fakos II IS-LS	In (ppm) Fakos II IS-LS	Sn (ppm) Fakos II IS-LS	Sb (ppm) Fakos II IS-LS	Te (ppm) Fakos II IS-LS	Au (ppm) Fakos II IS-LS	Tl (ppm) Fakos II IS-LS	Pb (ppm) Fakos II IS-LS	Bi (ppm) Fakos II IS-LS	Co/Ni (ppm) Fakos II IS-LS	Se/Pb (ppm) Fakos II IS-LS	Bi/Pb (ppm) Fakos II IS-LS	Co/As (ppm) Fakos II IS-LS	Tl/Pb (ppm) Fakos II IS-LS	Sb/Pb (ppm) Fakos II IS-LS	Ag/Co (ppm) Fakos II IS-LS	Ag/Pb (ppm) Fakos II IS-LS	Bi/Co (ppm) Fakos II IS-LS	Se/Co (ppm) Fakos II IS-LS	Tl/Co (ppm) Fakos II IS-LS	Sb/Co (ppm) Fakos II IS-LS	Ag/Co (ppm) Fakos II IS-LS			Mn L.O.D. Howell Fakos II IS-LS	Fe L.O.D. Howell Fakos II IS-LS	Co L.O.D. Howell Fakos II IS-LS	Ni L.O.D. Howell Fakos II IS-LS	Cu L.O.D. Howell Fakos II IS-LS	Zn L.O.D. Howell Fakos II IS-LS	Ga L.O.D. Howell Fakos II IS-LS	Ge L.O.D. Howell Fakos II IS-LS	As L.O.D. Howell Fakos II IS-LS	Se L.O.D. Howell Fakos II IS-LS
[truncated: 91 more rows]
[truncated: 111 more columns]

[truncated: 4 more sheets: Kaspakas sericitic, Kaspakas epithermal IS, Sardes porphyry potassic prop, Sardes epithermal IS]
