# Supplementary material for: In-situ trace element and S isotope systematics in pyrite from three porphyry-epithermal prospects, Limnos Island, Greece
Source: Frontiers journal article supplement (doi:10.3389/feart.2022.916107), 2022-10-10
Supplement: Table_6.DOCX [file Table_6.DOCX]

| Table A6: Laser and ICP settings for δ34S measurements | |
| --- | --- |
| **Laser** |  |
| Spot size | 50 µm |
| Fluence | 1.5 J/cm2 |
| Repetition rate | 10 Hz |
| He flow rate | 0.8 l/min |
|  |  |
| **ICP** |  |
| *Plasma* |  |
| RF power | 1150 W |
| RF matching | 0.80 V |
| Sample depth | 5 mm |
| Nebulizer gas | 0.80 l/min |
| Plasma gas | 15 l/min |
| Auxiliary gas | 0.9 l/min |
| *Lenses* |  |
| Extract 1 | -6.5 V |
| Extract 2 | -250 V |
| Omega bias | -130 V |
| Omega lens | 7.2 V |
| Q1 entrence | -50 V |
| Q1 exit | 1.0 V |
| Cell focus | -4.0 V |
| Cell entrance | -40 V |
| Cell exit | -60 V |
| Deflect | 12.4 V |
| Plate bias | -50 V |
| *Q1* |  |
| Q1 bias | 0 V |
| Q1 prefilter bias | -6.5 V |
| Q1 postfilter bias | -5 V |
| *Cell* |  |
| O2 gas flow | 0.165 l/min |
| OctP bias | -8.0 V |
| OctP RF | 120 V |
| Axial Acceleration | 2.0 V |
| Energy discrimination | -7.0 V |
