# Supplementary material for: In-situ trace element and S isotope systematics in pyrite from three porphyry-epithermal prospects, Limnos Island, Greece
Source: Frontiers journal article supplement (doi:10.3389/feart.2022.916107), 2022-10-10
Supplement: Table_7.XLSX [file Table_7.XLSX]

## Sheet: All_data
Table A7: Results of in-situ d34S measurements via LA-ICP-MS
Fakos I	Probe Fakos I	Zeit Fakos I	Zeit (min) Fakos I	34S/32S_back Fakos I	Stabw Fakos I	RSD (‰) Fakos I	RSD_mean (‰) Fakos I	34S/32S_back_drift Fakos I	d34S_VCDT_back_drift_corr_MBmeth2 Fakos I	d34S_VCDT_back_drift_corr_MBmeth1 Fakos I
24	LEM64_I_2	0.676435	184.85	0.0547886	0.00206361	37.665	1.86698	0.0552804	-8.80025	-4.0191	+-1.86698463710209
25	LEM64_II_1	0.678958	188.483	0.0547946	0.00198924	36.3036	1.7995	0.0552961	-8.44415	-3.73576	+-1.79950133659923
26	LEM64_II_2	0.681528	192.183	0.055012	0.0019166	34.8396	1.72694	0.0555234	-3.29878	0.358304	+-1.7269359223609
27	LEM64_V_1	0.69684	214.233	0.0547266	0.0018164	33.1903	1.64518	0.0552967	-8.43248	-3.72647	+-1.64518395397158
28	LEM64_V_2	0.699363	217.867	0.0547024	0.0018202	33.2746	1.64936	0.0552821	-8.7614	-3.98819	+-1.64935931432214
										1000	+-
	LM33_1	0.754745	81.2	0.0546788	0.00216933	39.6741	1.96657	0.0548209	-8.83462	-4.10232	+-1.96657421313949
7	LM33_2	0.757269	84.8333	0.0547457	0.00212921	38.8928	1.92784	0.0548942	-7.17515	-2.77096	+-1.92784389408224
8	LM33_3	0.75985	88.55	0.0544144	0.00190014	34.9198	1.73091	0.0545694	-14.5298	-8.67143	+-1.73091263693173
12	LM33_7	0.780255	117.933	0.0548277	0.00211445	38.5653	1.91161	0.0550341	-4.00579	-0.228233	+-1.91161340200177
13	LM33_8	0.782778	121.567	0.0544785	0.00198272	36.3946	1.80401	0.0546913	-11.77	-6.45734	+-1.80401302777225
35	LM89_I_1	0.879688	261.117	0.0545324	0.0021451	39.3362	1.94982	0.0549895	-5.01653	-1.03914	+-1.94982320219071					k
36	LM89_II_1	0.856748	228.083	0.0545339	0.00198589	36.4158	1.80506	0.0549331	-6.29395	-2.06399	+-1.80506192031488
37	LM89_II_2	0.869479	246.417	0.0547285	0.00189895	34.6977	1.7199	0.0551598	-1.16063	2.05439	+-1.7198991599537
38	LM89_III_1	0.87206	250.133	0.054639	0.00208628	38.1829	1.89266	0.0550769	-3.03887	0.54751	+-1.89265553242515
39	LM89_III_2	0.874583	253.767	0.0544928	0.00194035	35.6075	1.765	0.054937	-6.20651	-1.99384	+-1.76500041980698
40	LM89_III_3	0.877153	257.467	0.054435	0.00185428	34.0641	1.68849	0.0548857	-7.36771	-2.92545	+-1.6884931206231
41	LM89_V_1	0.892454	279.5	0.0545774	0.00197354	36.1604	1.79241	0.0550667	-3.2692	0.362721	+-1.7924052352928
42	LM89_V_2	0.894988	283.15	0.0546054	0.00199687	36.5692	1.81267	0.055101	-2.49192	0.986316	+-1.81266808617039
43	LM89_V_3	0.897558	286.85	0.0545082	0.00178301	32.7109	1.62142	0.0550103	-4.5449	-0.660755	+-1.62141754474779
										1000	+-
31	LM29_I_1	0.627951	115.033	0.0549176	0.00190132	34.6213	1.71611	0.0552237	-10.0853	-5.04162	+-1.71611427381476
32	LM29_I_2	0.630521	118.733	0.0548362	0.00203818	37.1685	1.84237	0.0551522	-11.7042	-6.32974	+-1.84237286621951
33	LM29_II_1	0.633044	122.367	0.0549528	0.00193178	35.1535	1.74249	0.0552784	-8.845	-4.05471	+-1.74249387355722
34	LM29_II_2	0.635625	126.083	0.0548683	0.00191549	34.9107	1.73046	0.0552038	-10.5346	-5.3991	+-1.73046099140508
35	LM29_III_1	0.638148	129.717	0.0550902	0.00198839	36.0933	1.78908	0.0554353	-5.29284	-1.22832	+-1.78908081577762
36	LM29_III_2	0.650926	148.117	0.0549857	0.00188902	34.3547	1.7029	0.0553798	-6.55009	-2.2287	+-1.70289980729454
37	LM29_IV_1	0.653449	151.75	0.0548534	0.00193527	35.2808	1.7488	0.0552572	-9.32717	-4.43836	+-1.74880285874698
38	LM29_IV_2	0.65603	155.467	0.0547498	0.0018431	33.6641	1.66867	0.0551635	-11.4487	-6.12645	+-1.66866839985739
										1000	+-
2	LEM7_II_1	0.569317	30.6	0.0549038	0.00202411	36.8666	1.82741	0.0549852	-15.4849	-9.33797	+-1.82740868689781
4	LEM7_II_I_2	0.561655	19.5667	0.0546101	0.00209061	38.2825	1.89759	0.0546622	-22.7987	-15.1574	+-1.89759393410779
5	LEM7_II_I_3	0.564225	23.2667	0.054763	0.00212834	38.8646	1.92644	0.0548249	-19.1143	-12.2258	+-1.92644423381398
6	LEM7_II_I_4	0.566748	26.9	0.054769	0.00224664	41.0203	2.0333	0.0548406	-18.7593	-11.9433	+-2.03329976864222
7	LEM7_II_II_2	0.582037	48.9167	0.0548609	0.00195651	35.6631	1.76776	0.0549911	-15.3518	-9.23205	+-1.7677564601189
8	LEM7_II_III_1	0.584618	52.6333	0.0546459	0.00188046	34.4117	1.70573	0.054786	-19.9963	-12.9276	+-1.70572522526574
9	LEM7_II_III_2	0.587141	56.2667	0.0546051	0.00196576	35.9997	1.78444	0.0547548	-20.7026	-13.4896	+-1.78443769683902
10	LEM7_II_III_3	0.589711	59.9667	0.0545272	0.00194433	35.6579	1.7675	0.0546868	-22.2421	-14.7145	+-1.76749774384049
11	LEM7_II_III_5	0.592245	63.6167	0.0547058	0.00203786	37.2512	1.84647	0.054875	-17.9798	-11.3231	+-1.84647447871005
										1000	+-
12	LEM8I_I_1	0.605023	82.0167	0.0548071	0.00222878	40.6659	2.01573	0.0550253	-14.5775	-8.61591	+-2.01573157944733
13	LEM8I_II	0.607535	85.6333	0.0549715	0.00198134	36.043	1.78658	0.0551993	-10.6364	-5.48011	+-1.78658450173425
14	LEM8I_III_1	0.610116	89.35	0.0550844	0.00209577	38.0466	1.8859	0.0553221	-7.85563	-3.26748	+-1.88589846999816
15	LEM8I_III_2	0.61265	93	0.0550668	0.00204695	37.1722	1.84256	0.0553142	-8.03516	-3.41033	+-1.84255978712121
16	LEM8I_IV	0.61522	96.7	0.0550468	0.00205234	37.2836	1.84808	0.0553041	-8.26509	-3.59329	+-1.84808170431517
14	LEM18_1	0.833773	195	0.0546053	0.00186297	34.1171	1.69112	0.0549466	-5.98809	-1.8186	+-1.69112021552118
15	LEM18_2	0.846562	213.417	0.0546879	0.00209957	38.3919	1.90301	0.0550615	-3.38752	0.267789	+-1.90301378520735
17	LEM18_4	0.851655	220.75	0.0545883	0.00199972	36.6327	1.81582	0.0549747	-5.35085	-1.30735	+-1.81581645472375
18	LEM18_I	0.823576	180.317	0.0550302	0.00214407	38.9616	1.93126	0.0553458	3.05117	5.43344	+-1.93125709302053
1	LEM8_IV_1	0.684051	195.817	0.0548666	0.00196529	35.8195	1.77551	0.0553876	-6.37324	-2.08798	+-1.77550619372397
19	LEM18_IV_1	0.826157	184.033	0.0548929	0.00201418	36.6929	1.8188	0.0552151	0.0909777	3.05853	+-1.81879892399759
21	LEM18_IV	0.83125	191.367	0.0547354	0.00208094	38.0182	1.88449	0.0550704	-3.18438	0.430765	+-1.88449008857349
22	LEM19III_1	0.708843	15.1	0.0544882	0.00200484	36.794	1.82381	0.0545146	-15.7703	-9.66672	+-1.8238113625535
23	LEM19III_2	0.711366	18.7333	0.0547072	0.00188651	34.4837	1.70929	0.05474	-10.6665	-5.57203	+-1.70929476117438
24	LEM19III_3	0.713947	22.45	0.0547235	0.00201342	36.7926	1.82374	0.0547628	-10.1494	-5.15718	+-1.82374211595962
25	LEM19III_4	0.71647	26.0833	0.0545904	0.00199199	36.4898	1.80873	0.0546361	-13.0194	-7.45973	+-1.80873165620667
26	LEM19III_5	0.719039	29.7833	0.0547746	0.00203647	37.1791	1.8429	0.0548267	-8.70331	-3.99698	+-1.842897491335
										1000	+-
27	LEM51_1	0.785347	125.267	0.0548371	0.00204009	37.2027	1.84407	0.0550563	-3.50322	0.174969	+-1.84406870925013
28	LEM51_2	0.78787	128.9	0.0546312	0.00203624	37.2724	1.84753	0.0548568	-8.02083	-3.44943	+-1.84752518385805
29	LEM51_3	0.800648	147.3	0.0549081	0.00207103	37.7181	1.86962	0.0551659	-1.02156	2.16596	+-1.86961621506768
30	LEM51_4	0.803171	150.933	0.0548816	0.00189274	34.4877	1.70949	0.0551458	-1.47741	1.80024	+-1.70948952610836
31	LEM51_5	0.805741	154.633	0.0549089	0.00195705	35.6417	1.76669	0.0551796	-0.712889	2.4136	+-1.76669221790269
32	LEM51_6	0.808264	158.267	0.0548826	0.00207478	37.804	1.87388	0.0551596	-1.1651	2.0508	+-1.87387521342309
33	LEM51_7	0.810833	161.967	0.0547982	0.00196021	35.7715	1.77313	0.0550817	-2.9284	0.636134	+-1.77312535055206
17	LEM35_1	0.701944	221.583	0.0547885	0.00222012	40.5216	2.00858	0.0553781	-6.58764	-2.25857	+-2.0085822106785
20	LEM35_IV_1	0.707037	228.917	0.0548621	0.00203377	37.0705	1.83752	0.0554712	-4.47995	-0.581523	+-1.83751761285848
21	LEM35_IV_2	0.719769	247.25	0.0547285	0.00194449	35.5298	1.76115	0.0553863	-6.40172	-2.11064	+-1.76114784123178
29	LEM65_I	0.658553	159.1	0.0548489	0.00204082	37.2081	1.84434	0.0552723	-8.98485	-4.16598	+-1.8443372159641
										1000	+-
5	LEM33I_5	0.741968	62.8	0.0546279	0.00205794	37.6719	1.86733	0.0547379	-10.7149	-5.61087	+-1.86732512196466

## Sheet: Tabelle1
	Probe	Zeit	Zeit (min)	34S/32S_back	Stabw	RSD (‰)	RSD_mean (‰)	34S/32S_back_drift	d34S_VCDT_back_drift_corr_MBmeth2	d34S_VCDT_back_drift_corr_MBmeth1
2	LEM7_II_1	0.569317	30.6	0.0549038	0.00202411	36.8666	1.82741	0.0549852	-15.4849	-9.33797
4	LEM7_II_I_2	0.561655	19.5667	0.0546101	0.00209061	38.2825	1.89759	0.0546622	-22.7987	-15.1574
5	LEM7_II_I_3	0.564225	23.2667	0.054763	0.00212834	38.8646	1.92644	0.0548249	-19.1143	-12.2258	2.93156
6	LEM7_II_I_4	0.566748	26.9	0.054769	0.00224664	41.0203	2.0333	0.0548406	-18.7593	-11.9433
7	LEM7_II_II_2	0.582037	48.9167	0.0548609	0.00195651	35.6631	1.76776	0.0549911	-15.3518	-9.23205
8	LEM7_II_III_1	0.584618	52.6333	0.0546459	0.00188046	34.4117	1.70573	0.054786	-19.9963	-12.9276	3.69551
9	LEM7_II_III_2	0.587141	56.2667	0.0546051	0.00196576	35.9997	1.78444	0.0547548	-20.7026	-13.4896
10	LEM7_II_III_3	0.589711	59.9667	0.0545272	0.00194433	35.6579	1.7675	0.0546868	-22.2421	-14.7145
11	LEM7_II_III_5	0.592245	63.6167	0.0547058	0.00203786	37.2512	1.84647	0.054875	-17.9798	-11.3231
12	LEM8I_I_1	0.605023	82.0167	0.0548071	0.00222878	40.6659	2.01573	0.0550253	-14.5775	-8.61591
13	LEM8I_II	0.607535	85.6333	0.0549715	0.00198134	36.043	1.78658	0.0551993	-10.6364	-5.48011
14	LEM8I_III_1	0.610116	89.35	0.0550844	0.00209577	38.0466	1.8859	0.0553221	-7.85563	-3.26748
15	LEM8I_III_2	0.61265	93	0.0550668	0.00204695	37.1722	1.84256	0.0553142	-8.03516	-3.41033
16	LEM8I_IV	0.61522	96.7	0.0550468	0.00205234	37.2836	1.84808	0.0553041	-8.26509	-3.59329
17	LEM35_1	0.701944	221.583	0.0547885	0.00222012	40.5216	2.00858	0.0553781	-6.58764	-2.25857
20	LEM35_IV_1	0.707037	228.917	0.0548621	0.00203377	37.0705	1.83752	0.0554712	-4.47995	-0.581523
21	LEM35_IV_2	0.719769	247.25	0.0547285	0.00194449	35.5298	1.76115	0.0553863	-6.40172	-2.11064	1.52912
24	LEM64_I_2	0.676435	184.85	0.0547886	0.00206361	37.665	1.86698	0.0552804	-8.80025	-4.0191
25	LEM64_II_1	0.678958	188.483	0.0547946	0.00198924	36.3036	1.7995	0.0552961	-8.44415	-3.73576
26	LEM64_II_2	0.681528	192.183	0.055012	0.0019166	34.8396	1.72694	0.0555234	-3.29878	0.358304
1	LEM64_IV_1	0.684051	195.817	0.0548666	0.00196529	35.8195	1.77551	0.0553876	-6.37324	-2.08798
27	LEM64_V_1	0.69684	214.233	0.0547266	0.0018164	33.1903	1.64518	0.0552967	-8.43248	-3.72647
28	LEM64_V_2	0.699363	217.867	0.0547024	0.0018202	33.2746	1.64936	0.0552821	-8.7614	-3.98819
29	LEM65_I	0.658553	159.1	0.0548489	0.00204082	37.2081	1.84434	0.0552723	-8.98485	-4.16598
31	LM29_I_1	0.627951	115.033	0.0549176	0.00190132	34.6213	1.71611	0.0552237	-10.0853	-5.04162
32	LM29_I_2	0.630521	118.733	0.0548362	0.00203818	37.1685	1.84237	0.0551522	-11.7042	-6.32974	1.28812
33	LM29_II_1	0.633044	122.367	0.0549528	0.00193178	35.1535	1.74249	0.0552784	-8.845	-4.05471
34	LM29_II_2	0.635625	126.083	0.0548683	0.00191549	34.9107	1.73046	0.0552038	-10.5346	-5.3991
35	LM29_III_1	0.638148	129.717	0.0550902	0.00198839	36.0933	1.78908	0.0554353	-5.29284	-1.22832
36	LM29_III_2	0.650926	148.117	0.0549857	0.00188902	34.3547	1.7029	0.0553798	-6.55009	-2.2287	1.00037
37	LM29_IV_1	0.653449	151.75	0.0548534	0.00193527	35.2808	1.7488	0.0552572	-9.32717	-4.43836
38	LM29_IV_2	0.65603	155.467	0.0547498	0.0018431	33.6641	1.66867	0.0551635	-11.4487	-6.12645
5	LEM33I_5	17:48:26	62.8	0.0546279	0.00205794	37.6719	1.86733	0.0547379	-10.7149	-5.61087
6	LM33_1	18:06:50	81.2	0.0546788	0.00216933	39.6741	1.96657	0.0548209	-8.83462	-4.10232										34S/32S_back_downhole_corrected
7	LM33_2	18:10:28	84.8333	0.0547457	0.00212921	38.8928	1.92784	0.0548942	-7.17515	-2.77096	1.33136
8	LM33_3	18:14:11	88.55	0.0544144	0.00190014	34.9198	1.73091	0.0545694	-14.5298	-8.67143
12	LM33_7	18:43:34	117.933	0.0548277	0.00211445	38.5653	1.91161	0.0550341	-4.00579	-0.228233
13	LM33_8	18:47:12	121.567	0.0544785	0.00198272	36.3946	1.80401	0.0546913	-11.77	-6.45734
14	LEM18_1	20:00:38	195	0.0546053	0.00186297	34.1171	1.69112	0.0549466	-5.98809	-1.8186
15	LEM18_2	20:19:03	213.417	0.0546879	0.00209957	38.3919	1.90301	0.0550615	-3.38752	0.267789
17	LEM18_4	20:26:23	220.75	0.0545883	0.00199972	36.6327	1.81582	0.0549747	-5.35085	-1.30735
18	LEM18_I	19:45:57	180.317	0.0550302	0.00214407	38.9616	1.93126	0.0553458	3.05117	5.43344
19	LEM18_IV_1	19:49:40	184.033	0.0548929	0.00201418	36.6929	1.8188	0.0552151	0.0909777	3.05853
21	LEM18_IV	19:57:00	191.367	0.0547354	0.00208094	38.0182	1.88449	0.0550704	-3.18438	0.430765
22	LEM19III_1	17:00:44	15.1	0.0544882	0.00200484	36.794	1.82381	0.0545146	-15.7703	-9.66672
23	LEM19III_2	17:04:22	18.7333	0.0547072	0.00188651	34.4837	1.70929	0.05474	-10.6665	-5.57203
24	LEM19III_3	17:08:05	22.45	0.0547235	0.00201342	36.7926	1.82374	0.0547628	-10.1494	-5.15718
25	LEM19III_4	17:11:43	26.0833	0.0545904	0.00199199	36.4898	1.80873	0.0546361	-13.0194	-7.45973
26	LEM19III_5	17:15:25	29.7833	0.0547746	0.00203647	37.1791	1.8429	0.0548267	-8.70331	-3.99698
27	LEM51_1	18:50:54	125.267	0.0548371	0.00204009	37.2027	1.84407	0.0550563	-3.50322	0.174969
28	LEM51_2	18:54:32	128.9	0.0546312	0.00203624	37.2724	1.84753	0.0548568	-8.02083	-3.44943
29	LEM51_3	19:12:56	147.3	0.0549081	0.00207103	37.7181	1.86962	0.0551659	-1.02156	2.16596
30	LEM51_4	19:16:34	150.933	0.0548816	0.00189274	34.4877	1.70949	0.0551458	-1.47741	1.80024
31	LEM51_5	19:20:16	154.633	0.0549089	0.00195705	35.6417	1.76669	0.0551796	-0.712889	2.4136
32	LEM51_6	19:23:54	158.267	0.0548826	0.00207478	37.804	1.87388	0.0551596	-1.1651	2.0508
33	LEM51_7	19:27:36	161.967	0.0547982	0.00196021	35.7715	1.77313	0.0550817	-2.9284	0.636134
35	LM89_I_1	21:06:45	261.117	0.0545324	0.0021451	39.3362	1.94982	0.0549895	-5.01653	-1.03914
36	LM89_II_1	20:33:43	228.083	0.0545339	0.00198589	36.4158	1.80506	0.0549331	-6.29395	-2.06399
37	LM89_II_2	20:52:03	246.417	0.0547285	0.00189895	34.6977	1.7199	0.0551598	-1.16063	2.05439
38	LM89_III_1	20:55:46	250.133	0.054639	0.00208628	38.1829	1.89266	0.0550769	-3.03887	0.54751
39	LM89_III_2	20:59:24	253.767	0.0544928	0.00194035	35.6075	1.765	0.054937	-6.20651	-1.99384
40	LM89_III_3	21:03:06	257.467	0.054435	0.00185428	34.0641	1.68849	0.0548857	-7.36771	-2.92545	2.37794
41	LM89_V_1	21:25:08	279.5	0.0545774	0.00197354	36.1604	1.79241	0.0550667	-3.2692	0.362721
42	LM89_V_2	21:28:47	283.15	0.0546054	0.00199687	36.5692	1.81267	0.055101	-2.49192	0.986316	0.623595
43	LM89_V_3	21:32:29	286.85	0.0545082	0.00178301	32.7109	1.62142	0.0550103	-4.5449	-0.660755
	max									-15.1574
	min									5.43344
	average									-4.07852
	median									-3.44943

## Sheet: Fakos I
Fakos I	Probe Fakos I	Zeit Fakos I	Zeit (min) Fakos I	34S/32S_back Fakos I	Stabw Fakos I	RSD (‰) Fakos I	RSD_mean (‰) Fakos I	34S/32S_back_drift Fakos I	d34S_VCDT_back_drift_corr_MBmeth2 Fakos I	d34S_VCDT_back_drift_corr_MBmeth1 Fakos I
24	LEM64_I_2	0.676435	184.85	0.0547886	0.00206361	37.665	1.86698	0.0552804	-8.80025	-4.0191
25	LEM64_II_1	0.678958	188.483	0.0547946	0.00198924	36.3036	1.7995	0.0552961	-8.44415	-3.73576
26	LEM_8_IV_1	0.684051	195.817	0.0548666	0.00196529	35.8195	1.77551	0.0553876	-6.37324	-2.08798
27	LEM64_II_2	0.681528	192.183	0.055012	0.0019166	34.8396	1.72694	0.0555234	-3.29878	0.358304
16	LEM64_IV	0.61522	96.7	0.0550468	0.00205234	37.2836	1.84808	0.0553041	-8.26509	-3.59329
28	LEM64_V_1	0.69684	214.233	0.0547266	0.0018164	33.1903	1.64518	0.0552967	-8.43248	-3.72647
29	LEM64_V_2	0.699363	217.867	0.0547024	0.0018202	33.2746	1.64936	0.0552821	-8.7614	-3.98819
min	0	0.61522	96.7	0.0547024	0.0018164	33.1903	1.64518	0.0552804	-8.80025	-4.0191
max	0	0.699363	217.867	0.0550468	0.00206361	37.665	1.86698	0.0555234	-3.29878	0.358304
median	#NUM!	0.681528	192.183	0.0547946	0.00196529	35.8195	1.77551	0.0552967	-8.43248	-3.72647

## Sheet: Fakos II IS
Fakos II IS	Probe Fakos II IS	Zeit Fakos II IS	Zeit (min) Fakos II IS	34S/32S_back Fakos II IS	Stabw Fakos II IS	RSD (‰) Fakos II IS	RSD_mean (‰) Fakos II IS	34S/32S_back_drift Fakos II IS	d34S_VCDT_back_drift_corr_MBmeth2 Fakos II IS	d34S_VCDT_back_drift_corr_MBmeth1 Fakos II IS
6	LM33_1	18:06:50	81.2	0.0546788	0.00216933	39.6741	1.96657	0.0548209	-8.83462	-4.10232										34S/32S_back_downhole_corrected
7	LM33_2	18:10:28	84.8333	0.0547457	0.00212921	38.8928	1.92784	0.0548942	-7.17515	-2.77096
8	LM33_3	18:14:11	88.55	0.0544144	0.00190014	34.9198	1.73091	0.0545694	-14.5298	-8.67143
12	LM33_7	18:43:34	117.933	0.0548277	0.00211445	38.5653	1.91161	0.0550341	-4.00579	-0.228233
13	LM33_8	18:47:12	121.567	0.0544785	0.00198272	36.3946	1.80401	0.0546913	-11.77	-6.45734
35	LM89_I_1	21:06:45	261.117	0.0545324	0.0021451	39.3362	1.94982	0.0549895	-5.01653	-1.03914
36	LM89_II_1	20:33:43	228.083	0.0545339	0.00198589	36.4158	1.80506	0.0549331	-6.29395	-2.06399
37	LM89_II_2	20:52:03	246.417	0.0547285	0.00189895	34.6977	1.7199	0.0551598	-1.16063	2.05439
38	LM89_III_1	20:55:46	250.133	0.054639	0.00208628	38.1829	1.89266	0.0550769	-3.03887	0.54751
39	LM89_III_2	20:59:24	253.767	0.0544928	0.00194035	35.6075	1.765	0.054937	-6.20651	-1.99384
40	LM89_III_3	21:03:06	257.467	0.054435	0.00185428	34.0641	1.68849	0.0548857	-7.36771	-2.92545
41	LM89_V_1	21:25:08	279.5	0.0545774	0.00197354	36.1604	1.79241	0.0550667	-3.2692	0.362721
42	LM89_V_2	21:28:47	283.15	0.0546054	0.00199687	36.5692	1.81267	0.055101	-2.49192	0.986316
43	LM89_V_3	21:32:29	286.85	0.0545082	0.00178301	32.7109	1.62142	0.0550103	-4.5449	-0.660755
min		0.754745	81.2	0.0544144	0.00178301	32.7109	1.62142	0.0545694	-14.5298	-8.67143
max		0.897558	286.85	0.0548277	0.00216933	39.6741	1.96657	0.0551598	-1.16063	2.05439
median		0.87077	248.275	0.0545556	0.00198431	36.4052	1.80454	0.0549632	-5.61152	-1.51649

## Sheet: Fakos II HS
Fakos II HS	Probe Fakos II HS	Zeit Fakos II HS	Zeit (min) Fakos II HS	34S/32S_back Fakos II HS	Stabw Fakos II HS	RSD (‰) Fakos II HS	RSD_mean (‰) Fakos II HS	34S/32S_back_drift Fakos II HS	d34S_VCDT_back_drift_corr_MBmeth2 Fakos II HS	d34S_VCDT_back_drift_corr_MBmeth1 Fakos II HS
31	LM29_I_1	0.627951	115.033	0.0549176	0.00190132	34.6213	1.71611	0.0552237	-10.0853	-5.04162
32	LM29_I_2	0.630521	118.733	0.0548362	0.00203818	37.1685	1.84237	0.0551522	-11.7042	-6.32974
33	LM29_II_1	0.633044	122.367	0.0549528	0.00193178	35.1535	1.74249	0.0552784	-8.845	-4.05471
34	LM29_II_2	0.635625	126.083	0.0548683	0.00191549	34.9107	1.73046	0.0552038	-10.5346	-5.3991
35	LM29_III_1	0.638148	129.717	0.0550902	0.00198839	36.0933	1.78908	0.0554353	-5.29284	-1.22832
36	LM29_III_2	0.650926	148.117	0.0549857	0.00188902	34.3547	1.7029	0.0553798	-6.55009	-2.2287
37	LM29_IV_1	0.653449	151.75	0.0548534	0.00193527	35.2808	1.7488	0.0552572	-9.32717	-4.43836
38	LM29_IV_2	0.65603	155.467	0.0547498	0.0018431	33.6641	1.66867	0.0551635	-11.4487	-6.12645
min		0.627951	115.033	0.0547498	0.0018431	33.6641	1.66867	0.0551522	-11.7042	-6.32974
max		0.65603	155.467	0.0550902	0.00203818	37.1685	1.84237	0.0554353	-5.29284	-1.22832
median		0.636887	127.9	0.054893	0.00192364	35.0321	1.73648	0.0552404	-9.70626	-4.73999

## Sheet: Kaspakas I
Kaspakas I	Probe Kaspakas I	Zeit Kaspakas I	Zeit (min) Kaspakas I	34S/32S_back Kaspakas I	Stabw Kaspakas I	RSD (‰) Kaspakas I	RSD_mean (‰) Kaspakas I	34S/32S_back_drift Kaspakas I	d34S_VCDT_back_drift_corr_MBmeth2 Kaspakas I	d34S_VCDT_back_drift_corr_MBmeth1 Kaspakas I
2	LEM7_II_1	0.569317	30.6	0.0549038	0.00202411	36.8666	1.82741	0.0549852	-15.4849	-9.33797
4	LEM7_II_I_2	0.561655	19.5667	0.0546101	0.00209061	38.2825	1.89759	0.0546622	-22.7987	-15.1574
5	LEM7_II_I_3	0.564225	23.2667	0.054763	0.00212834	38.8646	1.92644	0.0548249	-19.1143	-12.2258
6	LEM7_II_I_4	0.566748	26.9	0.054769	0.00224664	41.0203	2.0333	0.0548406	-18.7593	-11.9433
7	LEM7_II_II_2	0.582037	48.9167	0.0548609	0.00195651	35.6631	1.76776	0.0549911	-15.3518	-9.23205
8	LEM7_II_III_1	0.584618	52.6333	0.0546459	0.00188046	34.4117	1.70573	0.054786	-19.9963	-12.9276
9	LEM7_II_III_2	0.587141	56.2667	0.0546051	0.00196576	35.9997	1.78444	0.0547548	-20.7026	-13.4896
10	LEM7_II_III_3	0.589711	59.9667	0.0545272	0.00194433	35.6579	1.7675	0.0546868	-22.2421	-14.7145
11	LEM7_II_III_5	0.592245	63.6167	0.0547058	0.00203786	37.2512	1.84647	0.054875	-17.9798	-11.3231
min		0.561655	19.5667	0.0545272	0.00188046	34.4117	1.70573	0.0546622	-22.7987	-15.1574
max		0.592245	63.6167	0.0549038	0.00224664	41.0203	2.0333	0.0549911	-15.3518	-9.23205
median		0.582037	48.9167	0.0547058	0.00202411	36.8666	1.82741	0.0548249	-19.1143	-12.2258

## Sheet: Kaspakas II
Kaspakas II	Probe Kaspakas II	Zeit Kaspakas II	Zeit (min) Kaspakas II	34S/32S_back Kaspakas II	Stabw Kaspakas II	RSD (‰) Kaspakas II	RSD_mean (‰) Kaspakas II	34S/32S_back_drift Kaspakas II	d34S_VCDT_back_drift_corr_MBmeth2 Kaspakas II	d34S_VCDT_back_drift_corr_MBmeth1 Kaspakas II
14	LEM18_1	20:00:38	195	0.0546053	0.00186297	34.1171	1.69112	0.0549466	-5.98809	-1.8186
15	LEM18_2	20:19:03	213.417	0.0546879	0.00209957	38.3919	1.90301	0.0550615	-3.38752	0.267789
17	LEM18_4	20:26:23	220.75	0.0545883	0.00199972	36.6327	1.81582	0.0549747	-5.35085	-1.30735
18	LEM18_I	19:45:57	180.317	0.0550302	0.00214407	38.9616	1.93126	0.0553458	3.05117	5.43344
19	LEM18_IV_1	19:49:40	184.033	0.0548929	0.00201418	36.6929	1.8188	0.0552151	0.0909777	3.05853
21	LEM18_IV	19:57:00	191.367	0.0547354	0.00208094	38.0182	1.88449	0.0550704	-3.18438	0.430765
22	LEM19III_1	17:00:44	15.1	0.0544882	0.00200484	36.794	1.82381	0.0545146	-15.7703	-9.66672
23	LEM19III_2	17:04:22	18.7333	0.0547072	0.00188651	34.4837	1.70929	0.05474	-10.6665	-5.57203
24	LEM19III_3	17:08:05	22.45	0.0547235	0.00201342	36.7926	1.82374	0.0547628	-10.1494	-5.15718
25	LEM19III_4	17:11:43	26.0833	0.0545904	0.00199199	36.4898	1.80873	0.0546361	-13.0194	-7.45973
26	LEM19III_5	17:15:25	29.7833	0.0547746	0.00203647	37.1791	1.8429	0.0548267	-8.70331	-3.99698
12	LEM8I_I_1	0.605023	82.0167	0.0548071	0.00222878	40.6659	2.01573	0.0550253	-14.5775	-8.61591
13	LEM8I_II	0.607535	85.6333	0.0549715	0.00198134	36.043	1.78658	0.0551993	-10.6364	-5.48011
14	LEM8I_III_1	0.610116	89.35	0.0550844	0.00209577	38.0466	1.8859	0.0553221	-7.85563	-3.26748
15	LEM8I_III_2	0.61265	93	0.0550668	0.00204695	37.1722	1.84256	0.0553142	-8.03516	-3.41033
26	LEM_8_IV_1	0.684051	195.817	0.0548666	0.00196529	35.8195	1.77551	0.0553876	-6.37324	-2.08798
min		0.605023	15.1	0.0544882	0.00186297	34.1171	1.69112	0.0545146	-15.7703	-9.66672
max		0.851655	220.75	0.0550844	0.00222878	40.6659	2.01573	0.0553876	3.05117	5.43344
median		0.715208	91.175	0.054755	0.0020138	36.7933	1.82378	0.0550434	-7.94539	-3.33891

## Sheet: Sardes I
Sardes I	Probe Sardes I	Zeit Sardes I	Zeit (min) Sardes I	34S/32S_back Sardes I	Stabw Sardes I	RSD (‰) Sardes I	RSD_mean (‰) Sardes I	34S/32S_back_drift Sardes I	d34S_VCDT_back_drift_corr_MBmeth2 Sardes I	d34S_VCDT_back_drift_corr_MBmeth1 Sardes I
27	LEM51_1	18:50:54	125.267	0.0548371	0.00204009	37.2027	1.84407	0.0550563	-3.50322	0.174969
28	LEM51_2	18:54:32	128.9	0.0546312	0.00203624	37.2724	1.84753	0.0548568	-8.02083	-3.44943
29	LEM51_3	19:12:56	147.3	0.0549081	0.00207103	37.7181	1.86962	0.0551659	-1.02156	2.16596
30	LEM51_4	19:16:34	150.933	0.0548816	0.00189274	34.4877	1.70949	0.0551458	-1.47741	1.80024
31	LEM51_5	19:20:16	154.633	0.0549089	0.00195705	35.6417	1.76669	0.0551796	-0.712889	2.4136
32	LEM51_6	19:23:54	158.267	0.0548826	0.00207478	37.804	1.87388	0.0551596	-1.1651	2.0508
33	LEM51_7	19:27:36	161.967	0.0547982	0.00196021	35.7715	1.77313	0.0550817	-2.9284	0.636134
17	LEM35_1	0.701944	221.583	0.0547885	0.00222012	40.5216	2.00858	0.0553781	-6.58764	-2.25857
20	LEM35_IV_1	0.707037	228.917	0.0548621	0.00203377	37.0705	1.83752	0.0554712	-4.47995	-0.581523
21	LEM35_IV_2	0.719769	247.25	0.0547285	0.00194449	35.5298	1.76115	0.0553863	-6.40172	-2.11064
29	LEM65_I	0.658553	159.1	0.0548489	0.00204082	37.2081	1.84434	0.0552723	-8.98485	-4.16598
min		0.658553	125.267	0.0546312	0.00189274	34.4877	1.70949	0.0548568	-8.98485	-4.16598
max		0.810833	247.25	0.0549089	0.00222012	40.5216	2.00858	0.0554712	-0.712889	2.4136
median		0.78787	158.267	0.0548489	0.00203624	37.2027	1.84407	0.0551659	-3.50322	0.174969

## Sheet: Sardes II
Sardes II	Probe Sardes II	Zeit Sardes II	Zeit (min) Sardes II	34S/32S_back Sardes II	Stabw Sardes II	RSD (‰) Sardes II	RSD_mean (‰) Sardes II	34S/32S_back_drift Sardes II	d34S_VCDT_back_drift_corr_MBmeth2 Sardes II	d34S_VCDT_back_drift_corr_MBmeth1 Sardes II
5	LEM33I_5	17:48:26	62.8	0.0546279	0.00205794	37.6719	1.86733	0.0547379	-10.7149	-5.61087
